# Supplementary material for: Characterization of Coastal Urban Watershed Bacterial Communities Leads to Alternative Community-Based Indicators
Source: PLoS One. 2010 Jun 23;5(6):e11285. doi: 10.1371/journal.pone.0011285 (PMC2890573; doi:10.1371/journal.pone.0011285)
Supplement: Table S4 — Total OTUs detected by PhyloChip for all 30 samples. Positive fraction and normalized fluorescence intensity values are reported. (3.87 MB XLS) [file pone.0011285.s007.xls]

## Sheet: Processed data
Phylum	Class	Order	Family	Subfamily	OTU	Rep.ProkMSA ID	Rep. Accession	Rep. rokMSA Name	H positive fraction	S1 positive fraction	S2 positive fraction	M1a positive fraction	M1b positive fraction	M1c positive fraction	M2a positive fraction	M2b positive fraction	M2c positive fraction	M3a positive fraction	M3b positive fraction	M3c positive fraction	M4a positive fraction	M4b positive fraction	M4c positive fraction	M5a positive fraction	M5b positive fraction	M5c positive fraction	M6a positive fraction	M6b positive fraction	M6c positive fraction	M7a positive fraction	M7b positive fraction	M7c positive fraction	M8a positive fraction	M8b positive fraction	M8c positive fraction	M9a positive fraction	M9b positive fraction	M9c positive fraction		H Fluorescence Intensity	S1 Fluorescence Intensity	S2 Fluorescence Intensity	M1a Fluorescence Intensity	M1b Fluorescence Intensity	M1c Fluorescence Intensity	M2a Fluorescence Intensity	M2b Fluorescence Intensity	M2c Fluorescence Intensity	M3a Fluorescence Intensity
Proteobacteria	Epsilonproteobacteria	Campylobacterales	Campylobacteraceae	sf_3	10546	109732	NZ_AAFL01000009.1	Campylobacter coli str. RM2228	1	0.062	0.067	0	0	0.067	0	0.053	0.056	0	0	0	0	0	0	0	0	0	0.056	0	0	0	0	0	0.059	0	0	0	0.067	0		1419.42	3.83197	14.5452	1.95414	1.1235	7.28348	2.00551	4.32365	4.46665	2.71939
Firmicutes	Clostridia	Clostridiales	Lachnospiraceae	sf_5	3149	14038	L34627.1	Eubacterium rectale	1	1	1	0	0	0	0.071	0	0	0	0	0.091	0	0.111	0.083	0	0	0	0.929	0.231	0.077	0.091	0	0	0	0	0	0	0.091	0		2119.97	2287.69	1875.43	3.90829	2.247	7.28348	21.0578	6.48547	8.03997	7.25172
Bacteroidetes	Bacteroidetes	Bacteroidales	Bacteroidaceae	sf_12	5264	NA			1	0.833	0.944	0.125	0	0.25	0	0	0	0	0	0	0	0	0	0	0	0	0	0	0	0	0	0	0	0	0	0	0	0		1101.48	192.557	642.718	1.95414	1.1235	0.910435	4.01101	1.08091	0.89333	1.81293
Firmicutes	Clostridia	Clostridiales	Lachnospiraceae	sf_5	4603	81552	AY169429.1	Faecalibacterium prausnitzii	0.8	1	1	0	0	0.143	0	0	0	0.111	0	0	0.125	0.125	0	0	0	0	0.2	0	0	0	0	0	0.222	0	0	0	0.167	0		141.188	1167.79	769.08	12.7019	8.98798	24.5818	7.01928	7.56638	12.5066	7.25172
Bacteroidetes	Bacteroidetes	Bacteroidales	Bacteroidaceae	sf_12	6064	85849	AE016933.1	Bacteroides thetaiotaomicron str. VPI-5482 VPI-5482	1	0.909	0.909	0	0	0.5	0.125	0.143	0.2	0.286	0.286	0.5	0	0	0	0.167	0.25	0.167	0.727	0.222	0.222	0.167	0.2	0.2	0.333	0.333	0.333	0.125	0.286	0.286		3032.84	1158.21	2219.06	11.7249	21.3465	71.9244	19.0523	16.2137	26.7999	44.4168
Firmicutes	Clostridia	Clostridiales	Peptococc/Acidaminococc	sf_11	161	13860	X72867.1	Phascolarctobacterium faecium	1	1	0.846	0.125	0	0.25	0	0	0.111	0.125	0.111	0	0	0	0	0.143	0	0	0	0.111	0.111	0	0	0	0.4	0.333	0.111	0.125	0.286	0.286		2041.29	1038.46	575.446	19.5414	17.976	55.5366	4.01101	10.8091	14.2933	18.1293
Bacteroidetes	Bacteroidetes	Bacteroidales	Bacteroidaceae	sf_12	6309	60914	AY126616.1	isolate str. SMARLAB 84634	0.5	0.917	0.846	0.125	0.167	0.167	0	0	0	0	0	0	0.143	0.2	0	0	0	0	0.222	0.143	0.125	0	0	0	0.125	0	0	0	0	0		271.598	324.76	718.171	2.93121	4.49399	7.28348	9.02478	4.32365	8.03997	7.25172
Firmicutes	Clostridia	Clostridiales	Lachnospiraceae	sf_5	2814	36059	AJ408980.1	human colonic clone HuCA29	1	1	0.4	0	0	0	0	0	0	0	0	0	0	0	0	0	0	0	0.143	0	0	0	0	0	0.167	0	0	0	0	0		544.273	618.864	98.1804	0.977072	2.247	8.19392	13.0358	9.72821	8.03997	7.25172
Firmicutes	Clostridia	Clostridiales	Lachnospiraceae	sf_5	2732	54048	AF371663.1	swine intestine clone p-1676-b3	1	0.889	0.214	0	0.091	0	0.182	0	0	0	0	0.1	0	0	0	0.1	0	0.1	0	0.111	0	0.083	0.1	0	0	0	0	0.083	0.083	0.077		771.682	250.994	82.7261	4.88536	5.61749	22.7609	11.0303	8.64729	11.6133	5.43879
Firmicutes	Clostridia	Clostridiales	Lachnospiraceae	sf_5	4541	32948	AF132258.1	adult human fecal matter clone adhufec296	1	1	0.417	0	0	0	0.1	0.125	0	0.1	0.125	0.111	0	0	0	0	0	0	0.2	0.143	0.111	0	0	0	0.1	0.125	0	0	0.167	0		797.549	351.584	144.543	8.79364	6.74099	18.2087	5.01377	9.72821	8.03997	14.5034
Firmicutes	Clostridia	Clostridiales	Clostridiaceae	sf_12	3057	49274	AY033434.1	Clostridium lactatifermentans str. G17	0.909	0.833	0.667	0.111	0.125	0.125	0.083	0.091	0.125	0.083	0.091	0.091	0.125	0.143	0.125	0.2	0.125	0.111	0.167	0.111	0.091	0.143	0.143	0.111	0.5	0.091	0.083	0.091	0.091	0.1		628.339	844.95	386.358	3.90829	5.61749	8.19392	7.01928	8.64729	7.14664	9.97111
Proteobacteria	Betaproteobacteria	Burkholderiales	Alcaligenaceae	sf_1	7680	73771	AF371863.1	swine intestine clone p-3623-18B3	1	0.133	0.667	0	0	0.214	0.083	0.077	0.077	0.154	0.154	0.154	0	0.077	0	0	0	0.077	0	0	0	0.154	0	0	0.2	0.667	0.083	0.25	0.385	0.429		3146.01	44.0677	183.634	18.5644	20.223	40.0592	9.02478	19.4564	36.6265	30.8198
Firmicutes	Clostridia	Clostridiales	Peptococc/Acidaminococc	sf_11	59	48207	AF371694.1	swine intestine clone p-1941-s962-3	1	1	0.417	0.333	0.556	0.4	0	0.222	0.4	0.444	0.3	0.222	0.2	0.333	0	0.333	0.3	0	0	0.222	0	0.375	0.333	0	0.4	0.444	0	0.364	0.5	0.417		2228.83	925.422	189.088	35.1746	61.7924	84.6705	16.0441	25.9419	57.1731	33.5392
Firmicutes	Clostridia	Clostridiales	Lachnospiraceae	sf_5	2893	81645	AY169411.1	Ruminococcus obeum	0.857	0.857	0.929	0.1	0.3	0.3	0.364	0.3	0.364	0.5	0.333	0.556	0.273	0.333	0.1	0.2	0.273	0	0.643	0.357	0.429	0	0.2	0	0.667	0.444	0.222	0.273	0.455	0.5		2487.49	2019.45	1086.35	24.4268	24.717	60.9992	45.1239	35.6701	62.5331	81.5818
Proteobacteria	Gammaproteobacteria	Pasteurellales	Pasteurellaceae	sf_1	8308	9620	M75039.1	Haemophilus actinomycetemcomitans	0.842	0.909	0.2	0.059	0.125	0.133	0.05	0.056	0.111	0.053	0.056	0.158	0.056	0.059	0.1	0.176	0.059	0.1	0.19	0.111	0.2	0.125	0.059	0.053	0.136	0.167	0.056	0.111	0.059	0.059		1648.99	273.028	82.7261	12.7019	13.482	25.4922	10.0275	17.2946	25.9066	14.5034
Firmicutes	Clostridia	Clostridiales	Peptococc/Acidaminococc	sf_11	940	13820	X84006.1	Veillonella dispar str. DSM 20735	1	0.938	0.375	0	0	0	0	0.077	0	0.231	0.357	0	0	0	0	0	0	0	0	0	0.267	0	0	0	0	0	0	0.231	0.286	0.231		1472.23	332.424	120.907	7.81657	16.8525	22.7609	9.02478	19.4564	14.2933	23.5681
Bacteroidetes	Bacteroidetes	Bacteroidales	Bacteroidaceae	sf_12	5441	52020	AJ408983.1	human colonic clone HuCA36	0.786	0.786	0.929	0.1	0.1	0	0.222	0.222	0	0.333	0.222	0.4	0.111	0.111	0.111	0	0	0	0.615	0.7	0.6	0	0	0	0.625	0.125	0	0.2	0.222	0.111		1771.85	1052.83	2010.88	5.86243	3.37049	10.9252	35.0964	31.3464	16.0799	37.1651
Firmicutes	gut clone group	Unclassified	Unclassified	sf_1	4312	21985	AJ408959.1	human colonic clone HuCA3	0.2	0.95	0.95	0	0	0	0.067	0.059	0.071	0.118	0.067	0.056	0.067	0	0.067	0	0.062	0	0.059	0.062	0.062	0.067	0	0.059	0.176	0.077	0.059	0.133	0.188	0.2		18.3221	635.15	378.176	4.88536	3.37049	11.8357	4.01101	4.32365	7.14664	10.8776
Firmicutes	Clostridia	Clostridiales	Clostridiaceae	sf_12	2898	39079	AJ132842.1	Dorea longicatena str. III-35	1	0.929	1	0.429	0.571	0.625	0.429	0.571	0.625	0.75	0.625	0.75	0.286	0.571	0	0.429	0.286	0.143	0.5	0.25	0.2	0.429	0.125	0.143	0.545	0.714	0.286	0.375	0.857	0.556		3292.58	1575.9	936.35	55.6931	91.0033	132.924	57.157	65.9356	107.2	88.8336
Bacteroidetes	Bacteroidetes	Bacteroidales	Bacteroidaceae	sf_12	5979	105416	AP006841.1	Bacteroides fragilis str. YCH46	1	1	0.955	0.286	0.385	0.286	0.278	0.235	0.4	0.353	0.467	0.733	0.312	0.375	0.2	0.077	0.071	0.125	0.471	0.438	0.421	0.125	0.118	0.125	0.526	0.353	0.235	0.211	0.529	0.55		4091.21	471.333	1266.35	49.8307	35.9519	50.9844	33.0909	51.8838	60.7465	58.0138
Firmicutes	Clostridia	Clostridiales	Lachnospiraceae	sf_5	3016	14076	L34420.1	Eubacterium eligens	1	1	1	0.176	0.059	0.25	0.118	0.167	0.267	0.294	0.278	0.375	0.25	0.267	0.118	0.062	0.125	0.167	0.333	0.105	0.167	0.176	0.053	0.118	0.353	0.294	0.056	0.167	0.438	0.5		414.941	1482.02	635.445	21.4956	16.8525	39.1487	24.0661	35.6701	44.6665	38.978
Firmicutes	Mollicutes	Anaeroplasmatales	Erysipelotrichaceae	sf_3	4065	102627	AY699288.1	Clostridium ramosum M91	1	0.714	0.357	0	0	0	0.091	0.091	0	0.364	0.25	0.222	0.143	0.125	0.111	0	0.111	0.091	0	0	0	0.1	0	0.091	0.222	0	0	0.111	0.25	0.091		351.353	220.338	134.544	6.8395	13.482	10.9252	6.01652	10.8091	17.8666	40.7909
Firmicutes	Clostridia	Clostridiales	Lachnospiraceae	sf_5	2769	NA			0.947	0.95	0.95	0	0.071	0.133	0.125	0	0.059	0.214	0.294	0.143	0.133	0	0	0	0	0	0.118	0.2	0.118	0	0	0	0.438	0.267	0	0.25	0.312	0.312		588.462	755.857	534.538	13.679	17.976	38.2383	21.0578	25.9419	27.6932	36.2586
Firmicutes	Clostridia	Clostridiales	Lachnospiraceae	sf_5	2819	NA			0.667	0.833	0.917	0	0	0.125	0.182	0.083	0.125	0.417	0.333	0.364	0	0	0	0	0	0	0.182	0	0	0	0	0	0.364	0.714	0	0.1	0.222	0.3		442.963	499.115	725.444	11.7249	12.3585	37.3278	19.0523	12.9709	27.6932	58.0138
Firmicutes	Clostridia	Clostridiales	Clostridiaceae	sf_12	4570	16652	AJ408991.1	human colonic clone HuCB7	1	1	1	0.235	0.267	0.467	0.167	0.158	0.333	0.65	0.6	0.619	0.077	0.133	0.059	0.059	0.176	0.056	0.35	0.188	0.15	0.053	0.176	0.105	0.714	0.556	0.15	0.5	0.75	0.6		659.594	1502.13	1125.44	43.9682	44.9399	87.4018	32.0881	36.751	53.5998	71.6107
Unclassified	Unclassified	Unclassified	Unclassified	sf_160	2930	NA			0.867	1	1	0.273	0.182	0.364	0.417	0.091	0.417	0.25	0.25	0.231	0.333	0.2	0	0.25	0.25	0.167	0.538	0.667	0.583	0.273	0.364	0.167	0.444	0.6	0.1	0.417	0.75	0.583		2212.66	1553.87	1052.71	33.2204	32.5814	71.014	42.1157	34.5892	54.4931	42.6038
Firmicutes	Clostridia	Clostridiales	Lachnospiraceae	sf_5	3028	14012	L76604.1	Ruminococcus torques str. ATCC 27756	0.8	1	0.818	0	0	0.286	0	0	0	0	0	0	0	0	0	0	0	0	0	0	0	0	0	0	0.2	0	0	0	0.125	0.25		224.176	428.223	189.997	4.88536	7.86449	45.5218	2.00551	7.56638	27.6932	5.43879
Bacteroidetes	Bacteroidetes	Bacteroidales	Prevotellaceae	sf_1	5632	72142	AF132249.1	adult human fecal matter clone adhufec235	0.957	0.913	0.792	0.25	0.235	0.286	0.381	0.429	0.273	0.421	0.364	0.5	0.412	0.353	0.579	0.3	0.25	0.348	0.348	0.333	0.375	0.476	0.211	0.333	0.478	0.368	0.238	0.35	0.333	0.4		2308.58	1326.82	1170.89	102.593	120.214	171.162	112.308	98.363	153.653	130.531
Bacteroidetes	Bacteroidetes	Bacteroidales	Bacteroidaceae	sf_12	5489	1986	X83951.1	Bacteroides caccae str. ATCC 43185T	1	0.833	0.917	0.7	0.444	0.556	0.417	0.364	0.667	0.444	0.375	0.6	0.7	0.7	0.182	0.333	0.286	0.2	0.583	0.375	0.333	0.286	0.25	0.222	0.818	0.375	0.222	0.5	0.778	0.75		3271.03	831.538	1546.34	178.804	133.696	252.191	85.2341	77.8256	150.973	118.747
Firmicutes	Bacilli	Lactobacillales	Lactobacillaceae	sf_1	3379	15201	M58828.1	Lactobacillus ruminis	0	0.963	0.037	0	0	0	0	0	0	0.053	0	0	0	0	0	0.045	0	0	0	0	0	0	0	0	0.056	0.067	0	0	0.059	0		1.07777	191.599	54.5447	0.977072	1.1235	3.64174	4.01101	1.08091	4.46665	2.71939
Proteobacteria	Gammaproteobacteria	Pseudomonadales	Moraxellaceae	sf_3	8626	86658	AJ550856.1	Enhydrobacter aerosaccus str. LMG 21877 = ATCC 27	0.133	1	0.542	0.176	0.176	0.2	0.111	0.111	0.176	0.158	0.158	0.15	0.188	0.188	0.111	0.25	0.25	0.143	0.318	0.389	0.476	0.133	0.188	0.105	0.19	0.188	0.158	0.158	0.235	0.188		109.932	2052.02	238.178	19.5414	17.976	46.4322	33.0909	35.6701	43.7732	38.0715
Firmicutes	Clostridia	Clostridiales	Lachnospiraceae	sf_5	3037	NA			1	1	0.417	0.1	0.143	0.333	0.111	0.25	0.375	0.375	0.333	0.444	0.222	0.25	0.1	0.111	0.125	0.125	0.125	0.125	0.1	0.111	0.125	0.111	0.5	0.571	0.111	0.222	0.444	0.455		794.315	570.964	357.268	19.5414	19.0995	60.0887	15.0413	25.9419	44.6665	38.0715
Bacteroidetes	Bacteroidetes	Bacteroidales	Bacteroidaceae	sf_12	5551	2020	L16486.1	Bacteroides uniformis	1	0.947	0.947	0.214	0.231	0.214	0.353	0.429	0.286	0.467	0.429	0.375	0.308	0.308	0.2	0.25	0.231	0.2	0.389	0.294	0.235	0.2	0.231	0.2	0.467	0.5	0.2	0.533	0.6	0.643		1492.71	1103.61	1935.43	35.1746	23.5935	60.0887	66.1817	89.7157	66.1064	112.402
Firmicutes	Clostridia	Clostridiales	Lachnospiraceae	sf_5	2872	30895	AB050852.1	clone GA36	0.905	0.913	0.85	0.235	0.308	0.188	0.294	0.176	0.267	0.333	0.375	0.353	0.357	0.214	0.214	0.25	0.308	0.2	0.375	0.25	0.222	0.25	0.286	0.2	0.444	0.333	0.235	0.312	0.5	0.438		735.038	674.427	566.355	30.2892	42.6929	54.6261	45.1239	37.8319	51.8132	50.762
Firmicutes	Clostridia	Clostridiales	Lachnospiraceae	sf_5	2939	20421	AF371657.1	swine intestine clone p-444-o3	0.789	1	0.421	0.071	0.077	0.071	0.067	0.067	0.071	0.133	0.133	0.125	0.133	0.062	0.067	0.133	0.062	0.133	0.059	0.143	0.133	0.067	0.071	0.077	0.176	0.154	0.071	0.067	0.133	0.067		247.887	278.776	148.18	8.79364	7.86449	17.2983	9.02478	9.72821	12.5066	19.9422
Bacteroidetes	Bacteroidetes	Bacteroidales	Bacteroidaceae	sf_12	5285	2030	X83953.1	Bacteroides stercoris str. ATCC 43183T	1	0.955	1	0.263	0.176	0.235	0.762	0.438	0.353	0.562	0.471	0.529	0.471	0.222	0.211	0.222	0.176	0.222	0.857	0.667	0.773	0.316	0.278	0.278	0.588	0.5	0.235	0.526	0.706	0.588		2477.79	1193.66	2259.97	40.0599	34.8284	69.1931	175.482	109.172	104.52	133.25
Firmicutes	Clostridia	Clostridiales	Lachnospiraceae	sf_5	3185	33320	AF371645.1	swine intestine clone p-1692-b3	0.941	1	0.941	0.2	0.167	0.125	0.167	0.111	0.167	0.1	0.077	0.083	0.125	0.167	0	0.125	0.167	0.125	0.267	0.1	0.111	0.111	0.125	0.125	0.214	0.1	0.1	0.133	0.625	0.5		246.809	1051.88	367.267	12.7019	20.223	10.0148	8.02203	4.32365	10.72	12.6905
Firmicutes	Clostridia	Clostridiales	Lachnospiraceae	sf_5	2777	70219	AJ270474.2	faeces isolate str. L1-83	1	1	0.867	0.273	0.333	0.3	0.308	0.417	0.4	0.385	0.385	0.429	0.4	0.444	0.182	0.25	0.364	0.182	0.429	0.417	0.357	0.333	0.556	0.25	0.538	0.333	0.333	0.5	0.615	0.667		2528.44	1629.55	946.35	54.716	64.0394	81.9392	45.1239	61.612	83.0797	81.5818
Firmicutes	Clostridia	Clostridiales	Lachnospiraceae	sf_5	3032	24781	AJ409005.1	human colonic clone HuCB40	1	0.917	1	0	0	0.167	0.222	0.3	0.125	0.3	0.3	0.4	0	0	0.2	0	0	0	0.556	0.375	0.333	0.111	0	0.111	0.5	0.3	0.25	0.333	0.6	0.5		712.405	1125.64	961.804	18.5644	13.482	54.6261	22.0606	31.3464	34.8399	62.5461
Firmicutes	Clostridia	Clostridiales	Lachnospiraceae	sf_5	2882	14085	AF052416.1	human fecal sample clone A19	0.533	1	0.529	0.083	0.182	0.444	0.3	0.182	0.364	0.25	0.25	0.231	0.2	0.091	0	0.091	0.167	0	0.357	0.5	0.083	0.167	0.1	0	0.231	0.455	0.083	0.5	0.364	0.5		442.963	798.967	421.812	17.5873	19.0995	91.0435	21.0578	19.4564	45.5598	28.1004
Bacteroidetes	Bacteroidetes	Bacteroidales	Bacteroidaceae	sf_12	5326	114030	AY916342.1	human stool clone C703	1	0.889	0.9	0.25	0.214	0.333	0.667	0.722	0.765	0.588	0.471	0.611	0.647	0.667	0.632	0.444	0.611	0.368	0.737	0.588	0.7	0.444	0.389	0.556	0.588	0.562	0.444	0.5	0.562	0.5		3365.87	814.294	1763.61	34.1975	31.4579	60.9992	196.54	276.713	248.346	185.825
Bacteroidetes	Bacteroidetes	Bacteroidales	Bacteroidaceae	sf_12	5425	37022	AB050108.1	Bacteroides ovatus str. JCM 5824T	0.867	0.867	1	0.385	0.357	0.2	0.429	0.357	0.385	0.429	0.429	0.5	0.357	0.417	0.308	0.214	0.25	0.231	0.4	0.2	0.2	0.231	0.231	0.231	0.5	0.357	0.286	0.4	0.429	0.462		1892.56	503.905	1220.89	150.469	132.573	147.491	231.636	180.512	328.746	154.099
Firmicutes	Clostridia	Clostridiales	Lachnospiraceae	sf_5	3137	113664	AY916197.1	human cecum biopsy clone K375	1	0.909	0.682	0.158	0.056	0.235	0.222	0.222	0.278	0.353	0.444	0.316	0.263	0.125	0.125	0.188	0.211	0.176	0.45	0.278	0.316	0.211	0.235	0.235	0.474	0.412	0.222	0.368	0.529	0.45		2055.3	938.834	673.627	21.4956	15.729	30.9548	57.157	60.5311	58.0665	112.402
Firmicutes	Clostridia	Clostridiales	Lachnospiraceae	sf_5	3189	14032	L76597.1	Ruminococcus gnavus str. ATCC 29149	1	1	0.56	0.333	0.294	0.316	0.333	0.368	0.333	0.368	0.368	0.412	0.3	0.263	0.25	0.316	0.333	0.316	0.381	0.368	0.348	0.333	0.235	0.278	0.526	0.333	0.316	0.353	0.471	0.368		3465.03	749.151	381.813	43.9682	29.211	75.5661	61.168	89.7157	103.626	110.589
Bacteroidetes	Bacteroidetes	Bacteroidales	Prevotellaceae	sf_1	5846	71701	AF357576.1	mpn-isolate group 3	0.933	0.867	0.467	0.154	0.222	0.333	1	0.308	0.3	0.385	0.385	0.5	0.273	0.133	0.077	0.167	0.167	0.167	0.308	0.214	0.214	0.182	0.167	0.154	0.583	0.25	0.231	0.583	0.583	0.583		2491.8	443.551	271.814	29.3121	35.9519	65.5513	284.782	47.5601	43.7732	74.3301
Firmicutes	Clostridia	Clostridiales	Clostridiaceae	sf_12	4591	46835	AF371799.1	swine intestine clone p-953-s962-5	0.688	1	0.8	0.3	0.273	0.444	0.455	0.333	0.3	0.462	0.385	0.462	0.2	0.333	0	0.1	0.273	0	0.071	0.182	0.167	0.364	0.1	0.154	0.5	0.364	0.143	0.462	0.5	0.583		494.696	828.664	452.721	31.2663	34.8284	109.252	39.1074	37.8319	67.8931	77.956
Bacteroidetes	Bacteroidetes	Bacteroidales	Unclassified	sf_15	5299	NA			1	1	0.913	0.176	0.062	0.143	0.222	0.25	0.235	0.235	0.222	0.316	0.267	0.176	0.2	0.2	0.188	0.176	0.316	0.222	0.211	0.25	0.25	0.278	0.5	0.267	0.211	0.222	0.267	0.312		1611.26	732.865	1271.8	19.5414	12.3585	25.4922	96.2643	122.143	59.8531	170.415
Firmicutes	Clostridia	Clostridiales	Lachnospiraceae	sf_5	3138	24175	AF371944.1	swine intestine clone p-5263-4Wb5	0.643	0.917	0.6	0.167	0.182	0.083	0.25	0.333	0.167	0.462	0.462	0.692	0.167	0.182	0.071	0.154	0.167	0.083	0.5	0.273	0.25	0.214	0.167	0.077	0.667	0.5	0.231	0.462	0.583	0.583		681.15	807.588	406.358	18.5644	14.6055	30.9548	28.0771	39.9937	34.8399	66.1719
Firmicutes	Bacilli	Lactobacillales	Streptococcaceae	sf_1	3637	70091	AF227836.1	str. 37236	0.75	1	0.769	0	0.111	0.375	0.5	0.556	0.556	0.545	0.455	0.5	0.3	0.2	0.5	0.545	0.444	0.556	0.545	0.5	0.583	0.444	0.444	0.556	0.4	0.3	0.375	0.25	0.455	0.5		181.065	1648.71	1191.8	23.4497	12.3585	57.3574	73.201	111.334	166.159	99.7111
Firmicutes	Clostridia	Clostridiales	Lachnospiraceae	sf_5	4255	29495	AF371720.1	swine intestine clone p-2609-9F5	0.857	0.905	0.95	0.188	0.133	0.375	0.35	0.294	0.333	0.684	0.556	0.632	0.25	0.125	0	0.312	0.125	0.059	0.545	0.125	0.105	0.353	0.077	0.235	0.81	0.556	0.1	0.562	0.875	0.684		887.003	480.913	422.721	40.0599	29.211	77.387	38.1046	47.5601	50.9198	98.8047
Firmicutes	Clostridia	Clostridiales	Lachnospiraceae	sf_5	2919	28914	AF371611.1	swine intestine clone p-2418-55G5	0.875	0.812	0.929	0.583	0.636	0.636	0.438	0.385	0.5	0.533	0.571	0.4	0.583	0.308	0.167	0.545	0.333	0.231	0.25	0.615	0.429	0.333	0.417	0.182	0.467	0.462	0.286	0.571	0.615	0.538		871.915	876.564	839.988	114.317	157.29	227.609	52.1432	74.5829	125.066	118.747
Bacteroidetes	Bacteroidetes	Bacteroidales	Bacteroidaceae	sf_12	5450	1988	X89217.1	Bacteroides sp str. BV-1	1	1	0.867	0.455	0.4	0.545	0.462	0.333	0.545	0.727	0.615	0.769	0.364	0.4	0.5	0.125	0.333	0.25	0.667	0.5	0.5	0.3	0.1	0.308	0.786	0.6	0.308	0.538	0.643	0.5		1458.22	955.119	1669.98	119.203	113.473	173.893	82.2258	76.7447	185.813	145.034
Firmicutes	Clostridia	Clostridiales	Lachnospiraceae	sf_5	3223	44923	AF371578.1	swine intestine clone p-619-a5	0.684	0.941	0.526	0.071	0.083	0	0.2	0.231	0.1	0.25	0.308	0.267	0.1	0.091	0.067	0.167	0.071	0.062	0.294	0.214	0.267	0.154	0.091	0.143	0.333	0.333	0.176	0.308	0.364	0.545		556.129	586.292	305.45	10.7478	6.74099	20.0296	35.0964	32.4274	24.1199	56.2008
Bacteroidetes	Bacteroidetes	Bacteroidales	Bacteroidaceae	sf_12	5424	2035	L16485.1	Bacteroides eggerthii	0.929	0.933	1	0.231	0.231	0.25	0.385	0.308	0.429	0.538	0.462	0.733	0.231	0.231	0.385	0.308	0.308	0.308	0.538	0.308	0.308	0.357	0.308	0.308	0.714	0.308	0.231	0.385	0.462	0.462		1589.71	603.536	1459.07	92.8218	148.302	130.192	204.562	153.489	266.212	246.558
Proteobacteria	Betaproteobacteria	Burkholderiales	Comamonadaceae	sf_1	7660	40166	AF233878.1	Comamonas denitrificans str. 2.99g	0.188	1	1	0.429	0.2	0.214	0.6	0.526	0.667	0.5	0.5	0.524	0.619	0.619	0.55	0.619	0.35	0.5	0.818	0.619	0.429	0.474	0.316	0.429	0.632	0.526	0.263	0.526	0.7	0.6		19.3998	2026.16	2158.15	75.2345	40.4459	76.4766	245.675	264.823	382.345	218.458
Proteobacteria	Gammaproteobacteria	Pasteurellales	Pasteurellaceae	sf_1	8848	49556	AF227858.1	str. 86355	0.944	0.722	0.133	0.5	0.375	0.412	0.176	0.176	0.375	0.278	0.188	0.353	0.062	0.062	0.222	0.294	0.059	0.188	0.667	0.118	0.471	0.188	0.059	0.176	0.667	0.647	0.421	0.353	0.5	0.5		1163.99	131.245	62.7264	79.1428	59.5454	81.9392	26.0716	30.2655	65.2131	35.3521
Firmicutes	Clostridia	Clostridiales	Clostridiaceae	sf_12	4478	34412	AF371797.1	swine intestine clone p-956-s962-5	0.824	0.824	0.938	0.438	0.375	0.562	0.286	0.25	0.333	0.471	0.438	0.647	0.357	0.286	0.143	0.267	0.214	0.312	0.529	0.471	0.333	0.286	0.25	0.188	0.882	0.5	0.294	0.412	0.765	0.706		577.684	768.311	637.263	92.8218	79.7684	174.804	35.0964	45.3983	70.5731	68.8913
Firmicutes	Clostridia	Clostridiales	Lachnospiraceae	sf_5	2747	34649	AF371559.1	swine intestine clone p-3075-SwA5	0.938	1	0.938	0.214	0.25	0.333	0.312	0.438	0.333	0.688	0.625	0.688	0.533	0.286	0.067	0.267	0.188	0.067	0.625	0.625	0.562	0.267	0.308	0.062	1	0.688	0.375	0.75	0.938	0.875		756.593	1035.59	769.08	25.4039	26.964	69.1931	47.1294	78.9066	75.9331	116.934
Fusobacteria	Fusobacteria	Fusobacterales	Fusobacteriaceae	sf_3	368	11291	M58678.1	Sebaldella termitidis	0.533	1	0.95	0.467	0.286	0.467	0.438	0.5	0.467	0.529	0.5	0.588	0.467	0.231	0.267	0.438	0.357	0.294	0.6	0.667	0.588	0.375	0.375	0.353	0.667	0.6	0.375	0.5	0.667	0.533		614.328	2263.74	1976.33	87.9364	60.6689	125.64	102.281	149.166	196.533	176.761
Firmicutes	Clostridia	Clostridiales	Lachnospiraceae	sf_5	4313	16054	X85100.1	Ruminococcus callidus	0.143	1	0.043	0.133	0.111	0.118	0.053	0.111	0.118	0.1	0.158	0.1	0.118	0.118	0.118	0.059	0.188	0.105	0.048	0.105	0.048	0.056	0	0.105	0.158	0	0	0.095	0.143	0.111		23.7109	327.634	61.8173	11.7249	10.1115	19.1191	12.033	12.9709	16.0799	11.784
Firmicutes	Clostridia	Clostridiales	Unclassified	sf_17	3142	NA			0.826	0.952	0.727	0.286	0.214	0.643	0.2	0.143	0.357	0.412	0.294	0.333	0.333	0.143	0.143	0.2	0.143	0.214	0.421	0.353	0.375	0.071	0.214	0.143	0.3	0.438	0.125	0.222	0.5	0.333		643.428	592.04	342.722	36.1517	31.4579	102.879	22.0606	29.1846	58.0665	58.0138
Bacteroidetes	Bacteroidetes	Bacteroidales	Prevotellaceae	sf_1	5403	2048	AJ006457.1	Prevotella bryantii str. B14 (DSM 11371 species )	0.8	0.909	0.75	0.25	0.25	0.375	0.545	0.455	0.333	0.8	0.636	0.636	0.286	0.286	0.375	0.143	0.25	0.2	0.7	0.6	0.667	0.556	0.333	0.4	0.8	0.6	0.364	0.7	0.636	0.818		1948.61	976.195	958.168	44.9453	26.964	59.1783	66.1817	71.3402	56.2798	135.063
Firmicutes	Clostridia	Clostridiales	Peptococc/Acidaminococc	sf_11	302	33044	AF371707.1	swine intestine clone p-2464-18B5	0.714	1	0.571	0.091	0.111	0.273	0.364	0.333	0.167	0.417	0.417	0.5	0.182	0.091	0.154	0.286	0.083	0.25	0.462	0.636	0.385	0.333	0.154	0.308	0.667	0.364	0.273	0.25	0.455	0.455		453.741	829.622	500.902	21.4956	17.976	56.447	58.1597	75.6638	56.2798	94.2723
Firmicutes	Clostridia	Clostridiales	Lachnospiraceae	sf_5	2874	50166	AF371583.1	swine intestine clone p-389-o3	0.842	0.947	0.765	0.364	0.364	0.364	0.188	0.357	0.364	0.533	0.533	0.533	0.4	0.4	0.133	0.25	0.231	0	0.4	0.4	0.333	0.214	0.231	0.176	0.444	0.462	0.188	0.4	0.538	0.533		722.105	560.426	412.721	64.4867	58.4219	140.207	30.0826	37.8319	70.5731	76.143
Firmicutes	Clostridia	Clostridiales	Lachnospiraceae	sf_5	3114	14007	L76595.1	Ruminococcus productus str. ATCC 27340	0.68	1	0.667	0.278	0.056	0.3	0.3	0.19	0.476	0.364	0.381	0.333	0.158	0.222	0.381	0.222	0.118	0	0.364	0.2	0.25	0.294	0.105	0.056	0.636	0.421	0.211	0.333	0.524	0.591		369.675	470.375	315.45	40.0599	25.8405	66.4618	37.1019	47.5601	117.026	64.359
Firmicutes	Clostridia	Clostridiales	Lachnospiraceae	sf_5	3102	18619	AF371567.1	swine intestine clone p-662-a5	0.929	0.786	0.786	0.6	0.556	0.778	0.417	0.417	0.455	0.462	0.545	0.615	0.6	0.364	0.273	0.417	0.556	0.273	0.462	0.364	0.25	0.4	0.5	0.273	0.667	0.5	0.333	0.462	0.692	0.692		907.481	474.207	437.266	117.249	179.76	223.967	84.2313	91.8775	140.253	114.215
Firmicutes	Clostridia	Clostridiales	Lachnospiraceae	sf_5	2737	14043	AF001754.1	rumen clone RF22	1	0.929	1	0.364	0.4	0.545	0.714	0.571	0.417	0.643	0.714	0.667	0.5	0.375	0.083	0.5	0.462	0.231	0.8	0.692	0.667	0.615	0.583	0.538	0.867	0.615	0.643	0.571	0.643	0.643		2021.89	1726.3	1218.16	41.037	51.6809	101.058	157.432	134.033	92.9063	237.494
Bacteroidetes	Bacteroidetes	Bacteroidales	Prevotellaceae	sf_1	6118	NA			0.846	0.833	0.909	0.083	0.111	0.111	0.75	0.909	0.818	0.833	0.917	0.917	0.917	0.833	0.818	0.364	0.545	0.364	0.75	0.909	0.545	0.818	0.545	0.455	0.769	0.909	0.364	0.818	0.75	0.909		1766.46	903.388	1184.53	35.1746	17.976	21.8504	162.446	212.94	185.813	251.091
Firmicutes	Clostridia	Clostridiales	Peptococc/Acidaminococc	sf_11	778	73552	AF530309.1	Crohn adult fecal flora clone cadhufec079h7	0.429	1	0.5	0.2	0.2	0.444	0.2	0.4	0.333	0.3	0.333	0.4	0.375	0.2	0.222	0.222	0.25	0.222	0.333	0.3	0.333	0.3	0.333	0.333	0.333	0.429	0.333	0.3	0.333	0.429		430.03	662.931	364.54	37.1287	52.8044	123.819	28.0771	44.3174	88.4397	47.1362
Bacteroidetes	Bacteroidetes	Bacteroidales	Prevotellaceae	sf_1	5929	2200	AJ011683.1	Prevotella albensis str. M384	0.917	0.917	0.75	0.571	0.571	0.556	0.5	0.6	0.444	0.545	0.667	0.818	0.444	0.556	0.444	0.5	0.556	0.4	0.6	0.444	0.556	0.6	0.444	0.556	0.818	0.75	0.364	0.667	0.875	0.7		1391.4	762.563	794.534	108.455	175.266	166.61	96.2643	113.496	123.28	92.4594
Bacteroidetes	Bacteroidetes	Bacteroidales	Prevotellaceae	sf_1	5986	69910	AF218619.1	Prevotella ruminicola str. TC2-28	0.909	0.833	0.727	0.2	0.111	0.6	0.375	0.444	0.625	0.444	0.444	0.778	0.429	0.111	0.222	0.444	0.4	0.111	0.375	0.25	0.333	0.333	0.333	0.2	0.778	0.625	0.333	0.4	1	0.875		674.683	462.711	550.901	29.3121	26.964	92.8644	50.1377	65.9356	131.32	77.0495
Bacteroidetes	Bacteroidetes	Bacteroidales	Unclassified	sf_15	5650	49689	AJ307947.1	derived microbial 'pearl'- community clone sipK20	0.545	0.333	0.444	0.364	0.4	0.4	0.333	0.364	0.5	0.455	0.455	0.417	0.4	0.5	0.364	0.333	0.364	0.364	0.364	0.333	0.333	0.333	0.455	0.333	0.385	0.444	0.25	0.182	0.917	0.4		631.572	120.707	206.361	51.7848	52.8044	125.64	67.1845	88.6348	182.239	80.6754
Bacteroidetes	Flavobacteria	Flavobacteriales	Flavobacteriaceae	sf_1	5788	21236	X85208.1	Type 1863 isolate str. F006C	0	1	1	0	0	0	0.312	0.312	0.25	0.438	0.312	0.688	0.071	0.077	0.077	0.067	0.067	0.077	1	0.938	0.75	0.071	0.077	0.067	0.067	0.733	0.071	0.062	0.062	0.25		1.07777	957.035	1580.89	1.95414	1.1235	1.82087	38.1046	50.8028	63.4264	67.9849
Firmicutes	Clostridia	Clostridiales	Lachnospiraceae	sf_5	2798	13995	X94965.1	Ruminococcus schinkii str. B; CIP 105464; DSM 10518	0.733	0.667	0.917	0.3	0.25	0.5	0.1	0.167	0.5	0.417	0.364	0.455	0.4	0.25	0	0.222	0.333	0.1	0.308	0.444	0.333	0.182	0.429	0.1	0.727	0.5	0.167	0.455	0.818	0.75		487.151	456.005	439.085	43.9682	55.0514	105.61	25.0688	25.9419	110.773	51.6685
Firmicutes	Clostridia	Clostridiales	Clostridiaceae	sf_12	2924	44883	AF371594.1	swine intestine clone p-2486-18B5	0.913	0.826	0.762	0.6	0.375	0.412	0.333	0.389	0.529	0.588	0.556	0.45	0.625	0.4	0.118	0.471	0.353	0.095	0.286	0.35	0.2	0.5	0.294	0.3	0.429	0.684	0.278	0.5	0.765	0.611		571.217	329.55	318.177	68.395	61.7924	93.7748	47.1294	57.2883	96.4797	79.7689
Firmicutes	Clostridia	Clostridiales	Lachnospiraceae	sf_5	3047	33906	AJ408977.1	human colonic clone HuCA26	0.933	0.938	0.688	0.429	0.462	0.533	0.188	0.286	0.429	0.462	0.467	0.333	0.4	0.5	0.143	0.357	0.4	0.125	0.2	0.417	0.143	0.2	0.308	0.188	0.4	0.538	0.231	0.467	0.6	0.533		383.686	544.14	296.359	67.4179	87.6329	172.072	30.0826	36.751	116.133	56.2008
Firmicutes	Clostridia	Clostridiales	Lachnospiraceae	sf_5	4435	35786	AF371778.1	swine intestine clone p-2498-18B5	0.944	0.944	0.889	0.222	0.222	0.312	0.579	0.579	0.526	0.632	0.632	0.632	0.579	0.333	0.222	0.412	0.625	0.25	0.611	0.55	0.6	0.556	0.368	0.556	0.737	0.706	0.579	0.667	0.706	0.722		1446.37	1287.54	829.079	69.3721	66.2864	132.013	119.328	148.085	125.96	282.817
Firmicutes	Clostridia	Clostridiales	Lachnospiraceae	sf_5	2808	83226	AJ508452.1	Clostridium bolteae str. 16351	1	1	1	0.538	0.538	0.615	0.667	0.667	0.643	0.688	0.75	0.875	0.643	0.429	0.538	0.462	0.615	0.538	0.941	0.667	0.667	0.5	0.357	0.533	0.882	0.812	0.667	0.688	0.938	1		2959.55	2235	1897.25	413.301	392.101	373.278	427.173	483.168	390.385	539.347
Fusobacteria	Fusobacteria	Fusobacterales	Fusobacteriaceae	sf_1	488	111436	NZ_AABF02000111.1	Fusobacterium nucleatum subsp. vincentii str. ATCC 49256	0.955	0.952	0.909	0.3	0.211	0.368	0.619	0.619	0.7	0.773	0.727	0.857	0.474	0.05	0.263	0.6	0.25	0.1	0.818	0.818	0.773	0.632	0.368	0.429	0.95	0.81	0.591	0.571	0.85	0.65		1077.77	1165.88	1603.61	42.9912	35.9519	70.1035	152.419	177.27	210.826	300.04
Firmicutes	Clostridia	Clostridiales	Clostridiaceae	sf_12	3134	32467	AF371679.1	swine intestine clone p-4247-4Wa3	0.96	0.72	0.435	0.316	0.267	0.529	0.333	0.375	0.55	0.409	0.565	0.455	0.429	0.5	0.087	0.458	0.389	0.13	0.346	0.545	0.333	0.286	0.368	0.13	0.478	0.619	0.25	0.478	0.619	0.571		1223.27	288.356	282.723	99.6613	131.449	185.729	61.168	108.091	159.013	139.596
Bacteroidetes	Bacteroidetes	Bacteroidales	Unclassified	sf_15	6288	NA			0.636	0.9	1	0.5	0.5	0.667	0.625	0.625	0.714	0.625	0.625	0.857	0.5	0.429	0.667	0.444	0.625	0.833	0.75	0.375	0.444	0.5	0.5	0.5	1	0.5	0.5	0.5	0.625	0.5		947.359	837.286	1514.52	90.8677	101.115	222.146	268.738	234.558	566.371	241.12
Firmicutes	Clostridia	Clostridiales	Lachnospiraceae	sf_5	2830	25934	AF132278.1	adult human fecal matter clone adhufec68	1	0.909	0.818	0.4	0.3	0.4	0.455	0.6	0.455	0.8	0.727	0.727	0.455	0.364	0.3	0.4	0.364	0.2	0.6	0.7	0.545	0.273	0.364	0.273	0.636	0.6	0.545	0.545	0.818	0.818		984.003	788.429	506.356	44.9453	32.5814	81.0287	63.1735	78.9066	138.466	125.999
Firmicutes	Clostridia	Clostridiales	Lachnospiraceae	sf_5	2986	39350	AF371571.1	swine intestine clone p-2168-959-3	0.889	1	0.778	0.357	0.214	0.5	0.333	0.467	0.333	0.412	0.467	0.5	0.286	0.2	0.267	0.333	0.267	0.188	0.467	0.5	0.471	0.333	0.385	0.312	0.467	0.5	0.333	0.467	0.5	0.533		732.883	1232.94	629.991	75.2345	64.0394	143.849	89.2451	125.386	95.5863	170.415
Firmicutes	Clostridia	Clostridiales	Lachnospiraceae	sf_5	2965	68343	AF481221.1	oral endodontic infection clone MCE9_173	0.938	0.938	0.938	0.583	0.583	0.75	0.769	0.769	0.692	0.714	0.714	0.714	0.692	0.583	0.615	0.615	0.769	0.538	0.8	0.714	0.714	0.769	0.462	0.692	0.867	0.786	0.769	0.714	0.8	0.786		2700.89	2017.53	1663.61	373.241	383.113	625.469	519.426	546.941	602.998	637.245
Firmicutes	Clostridia	Clostridiales	Lachnospiraceae	sf_5	3238	14023	AF052412.1	human fecal sample clone A11	0.733	0.941	0.824	0.286	0.25	0.385	0.385	0.308	0.4	0.615	0.538	0.667	0.4	0.3	0.308	0.333	0.5	0.417	0.5	0.308	0.462	0.286	0.25	0.385	0.833	0.538	0.385	0.643	0.769	0.714		847.126	752.983	613.627	58.6243	55.0514	108.342	78.2148	111.334	204.573	173.135
Firmicutes	Bacilli	Lactobacillales	Aerococcaceae	sf_1	3553	15259	Y17300.1	Desemzia incerta str. DSM 20581	0.583	1	0.667	0.091	0.1	0.1	0.333	0.545	0.455	0.583	0.583	0.583	0.333	0.1	0.417	0.583	0.091	0.091	0.667	0.273	0.727	0.182	0.091	0.182	0.667	0.583	0.25	0.583	0.667	0.833		307.164	909.136	736.353	10.7478	10.1115	12.7461	43.1184	58.3692	68.7864	136.876
Firmicutes	Clostridia	Clostridiales	Lachnospiraceae	sf_5	4449	72970	AF132277.1	adult human fecal matter clone adhufec58	0.545	1	0.417	0.25	0.625	0.444	0.222	0.2	0.444	0.3	0.3	0.25	0.444	0.375	0.125	0.25	0.222	0	0.2	0.3	0.222	0.333	0.222	0	0.333	0.667	0.2	0.4	0.6	0.545		80.8326	617.906	125.453	82.074	75.2744	131.103	37.1019	61.612	60.7465	88.8336
Bacteroidetes	Bacteroidetes	Bacteroidales	Rikenellaceae	sf_5	6278	101020	AY188321.1	penguin droppings sediment clone KD6-12	0.625	0.556	0.5	0.333	0.2	0.2	0.7	0.556	0.5	0.9	0.889	0.9	0.2	0.2	0	0	0.5	0.2	0.444	0.556	0.444	0.778	0.6	0.7	0.917	0.8	0.6	1	1	0.909		1686.71	370.743	1052.71	40.0599	31.4579	58.2679	108.297	94.0393	77.7197	249.278
Firmicutes	Clostridia	Clostridiales	Lachnospiraceae	sf_5	2949	16475	AJ408999.1	human colonic clone HuCB25	0.789	1	0.65	0.312	0.357	0.429	0.333	0.312	0.4	0.6	0.467	0.467	0.333	0.357	0.286	0.267	0.357	0.214	0.444	0.467	0.438	0.267	0.4	0.308	0.562	0.6	0.267	0.357	0.643	0.562		621.872	614.074	383.631	63.5097	68.5334	122.909	151.416	147.004	186.706	126.905
Firmicutes	Clostridia	Clostridiales	Unclassified	sf_17	2675	NA			1	1	0.737	0.375	0.571	0.562	0.5	0.471	0.562	0.625	0.529	0.562	0.533	0.467	0.4	0.467	0.529	0.412	0.526	0.556	0.368	0.333	0.533	0.412	0.588	0.765	0.389	0.647	0.824	0.588		1297.63	1173.54	798.17	249.153	362.89	349.607	185.509	198.888	260.852	261.062
Firmicutes	Clostridia	Clostridiales	Lachnospiraceae	sf_5	3097	41212	AF132257.1	adult human fecal matter clone adhufec295	0.955	0.8	0.667	0.263	0.353	0.389	0.389	0.235	0.375	0.444	0.5	0.421	0.294	0.312	0.263	0.294	0.267	0.25	0.529	0.294	0.333	0.176	0.133	0.211	0.824	0.5	0.278	0.412	0.647	0.588		1305.18	821.958	502.72	348.815	386.483	374.189	59.1625	85.392	194.746	113.308
Firmicutes	Clostridia	Clostridiales	Lachnospiraceae	sf_5	3143	29937	AB034113.1	rumen clone 4C28d-24	0.913	0.87	0.7	0.556	0.526	0.55	0.5	0.571	0.667	0.667	0.737	0.591	0.632	0.55	0.316	0.579	0.571	0.286	0.478	0.6	0.55	0.429	0.667	0.45	0.591	0.65	0.55	0.6	0.7	0.7		773.838	682.091	808.17	190.529	284.245	306.817	96.2643	117.819	268.892	168.602
Bacteroidetes	Bacteroidetes	Bacteroidales	Prevotellaceae	sf_1	6216	NA			0.923	0.846	0.667	0.75	0.769	0.857	0.692	0.692	0.769	0.769	0.667	0.786	0.833	0.667	0.714	0.643	0.75	0.692	1	0.462	0.643	0.692	0.643	0.643	0.714	0.714	0.533	0.769	0.923	0.692		910.714	456.005	653.627	134.836	162.907	349.607	308.848	317.788	600.318	301.853
Firmicutes	Clostridia	Clostridiales	Peptostreptococcaceae	sf_5	2859	14175	M26494.1	Clostridium sticklandii	0.625	1	0.917	0.3	0.5	0.5	0.455	0.5	0.5	0.556	0.556	0.5	0.222	0.2	0.3	0.5	0.364	0.333	0.833	0.667	0.5	0.5	0.4	0.417	0.545	0.5	0.455	0.556	0.7	0.556		362.13	1379.51	1143.62	43.9682	51.6809	97.4166	91.2506	112.415	168.839	146.847
Firmicutes	Clostridia	Clostridiales	Lachnospiraceae	sf_5	2975	14015	AF153858.1	faecal clone adhufec80.25	0.938	0.875	0.786	0.5	0.667	0.615	0.545	0.5	0.455	0.5	0.5	0.5	0.5	0.5	0.364	0.462	0.455	0.333	0.4	0.5	0.357	0.545	0.357	0.364	0.429	0.5	0.385	0.5	0.667	0.615		717.794	661.015	664.536	170.988	150.549	315.921	99.2726	159.975	240.306	200.329
Proteobacteria	Gammaproteobacteria	Pseudomonadales	Moraxellaceae	sf_3	9404	NA			0.062	0.944	0.133	0.062	0.077	0.071	0.118	0.133	0.071	0.2	0.133	0.133	0.071	0	0	0.125	0.133	0.125	0.235	0.231	0.176	0.071	0.071	0.133	0.125	0.133	0.062	0.133	0.143	0.133		4.31107	271.112	26.3633	6.8395	7.86449	7.28348	23.0633	24.861	11.6133	36.2586
Firmicutes	Clostridia	Clostridiales	Lachnospiraceae	sf_5	3146	29867	AJ408974.1	human colonic clone HuCA22	0.941	1	0.882	0.417	0.25	0.545	0.385	0.417	0.545	0.357	0.417	0.462	0.333	0.455	0.25	0.455	0.417	0.308	0.571	0.385	0.357	0.455	0.333	0.273	0.467	0.5	0.455	0.357	0.5	0.538		1033.58	1127.56	809.988	155.354	106.732	175.714	241.664	216.182	266.212	302.759
Bacteroidetes	Bacteroidetes	Bacteroidales	Prevotellaceae	sf_1	5940	55854	AF481226.1	Prevotella sp. str. E7_34	0.923	1	0.917	0.818	0.833	0.909	0.818	0.636	1	0.818	0.727	0.818	0.833	0.818	0.7	0.889	0.9	0.5	0.727	0.889	0.7	0.889	0.727	0.778	0.727	1	0.636	0.909	0.909	0.909		3093.2	1906.41	1634.52	1300.48	1194.28	1216.34	631.735	517.757	900.477	507.62
Proteobacteria	Betaproteobacteria	Neisseriales	Neisseriaceae	sf_1	8004	16445	AF389085.1	Laribacter hongkongensis str. HKU1	0.267	1	0.955	0.4	0.438	0.375	0.632	0.55	0.5	0.579	0.579	0.55	0.556	0.389	0.474	0.412	0.556	0.353	0.45	0.5	0.474	0.471	0.278	0.444	0.789	0.6	0.526	0.611	0.667	0.579		81.9104	1106.48	1363.62	82.074	86.5094	140.207	181.498	176.189	184.919	212.113
Bacteroidetes	Bacteroidetes	Bacteroidales	Prevotellaceae	sf_1	6259	NA			0.929	0.857	0.846	0.667	0.889	0.75	0.727	0.727	0.818	0.833	0.833	0.929	0.6	0.667	0.786	0.444	0.889	0.583	1	0.909	0.909	0.818	0.889	0.818	1	0.889	0.667	0.727	0.818	0.727		2405.58	795.135	1354.53	381.058	607.812	711.05	334.92	321.031	725.384	359.867
Firmicutes	Clostridia	Clostridiales	Unclassified	sf_17	2730	NA			1	1	0.946	0.515	0.607	0.656	0.694	0.6	0.625	0.711	0.722	0.806	0.636	0.581	0.636	0.559	0.613	0.5	0.821	0.771	0.632	0.559	0.6	0.588	0.811	0.75	0.611	0.8	0.784	0.811		2796.81	2664.18	2299.97	571.587	601.071	680.095	773.123	756.638	845.09	812.193
Firmicutes	Clostridia	Clostridiales	Lachnospiraceae	sf_5	2726	27488	AF371597.1	swine intestine clone p-1561-b5	1	0.972	0.914	0.56	0.542	0.6	0.9	0.733	0.69	0.806	0.871	0.839	0.556	0.522	0.448	0.655	0.643	0.5	0.824	0.9	0.844	0.714	0.667	0.567	0.794	0.839	0.71	0.774	0.935	0.903		3601.9	2682.38	2304.51	603.83	543.773	583.589	779.14	749.072	603.891	820.351
Bacteroidetes	Bacteroidetes	Bacteroidales	Porphyromonadaceae	sf_1	5530	74492	AJ318110.1	Waste-gas biofilter clone BIci17	0.778	0.923	0.923	0.091	0.111	0.1	0.3	0.364	0.222	0.583	0.583	0.75	0.3	0.2	0.222	0.375	0.2	0.3	1	0.2	0.364	0.182	0.143	0.2	0.75	0.364	0.182	0.333	0.75	0.333		876.226	673.469	841.806	107.478	7.86449	113.804	181.498	241.043	259.959	247.465
Proteobacteria	Betaproteobacteria	Burkholderiales	Alcaligenaceae	sf_1	7970	6821	L37786.1	Sutterella wadsworthensis str. 9054	0.95	0.895	0.947	0.235	0.188	0.312	0.389	0.471	0.412	0.471	0.471	0.444	0.353	0.294	0.333	0.5	0.438	0.368	0.529	0.471	0.412	0.471	0.412	0.471	0.556	0.5	0.368	0.444	0.611	0.5		1207.1	358.29	469.084	49.8307	69.6569	83.7601	243.669	321.031	354.652	305.479
Firmicutes	Clostridia	Clostridiales	Lachnospiraceae	sf_5	2952	72430	AJ270480.2	faeces isolate str. L1-81	0.923	0.923	0.846	0.75	0.667	0.75	0.583	0.5	0.692	0.667	0.643	0.615	0.75	0.636	0.5	0.636	0.385	0.333	0.615	0.583	0.615	0.455	0.286	0.417	0.571	0.692	0.308	0.571	0.857	0.786		770.604	684.007	687.263	494.398	417.941	581.768	118.325	134.033	243.879	132.344
Firmicutes	Bacilli	Lactobacillales	Streptococcaceae	sf_1	3250	39742	AF396920.1	Streptococcus bovis str. B315	1	1	1	0.625	0.667	0.8	0.765	0.765	0.8	0.941	0.882	0.941	0.733	0.692	0.8	0.733	0.714	0.688	1	0.941	0.882	0.625	0.714	0.75	1	0.941	0.824	0.941	0.941	1		3248.39	3305.08	2728.14	692.744	784.202	936.838	550.512	668.003	632.478	829.415
Firmicutes	Bacilli	Lactobacillales	Streptococcaceae	sf_1	3906	15437	AF104114.1	Streptococcus bovis str.ATCC 43143	1	1	1	0.625	0.667	0.8	0.765	0.765	0.8	0.941	0.882	0.941	0.733	0.692	0.8	0.733	0.714	0.688	1	0.941	0.882	0.625	0.714	0.75	1	0.941	0.824	0.941	0.941	1		3248.39	3305.08	2728.14	692.744	784.202	936.838	550.512	668.003	632.478	829.415
Proteobacteria	Gammaproteobacteria	Pasteurellales	Pasteurellaceae	sf_1	8952	9579	M75068.1	Actinobacillus lignieresii	1	0.889	0.833	0.765	0.688	0.647	0.824	0.867	0.778	0.765	0.765	0.867	0.667	0.611	0.647	0.588	0.625	0.562	0.875	0.75	0.722	0.714	0.438	0.529	0.765	0.812	0.588	0.688	0.75	0.765		2819.44	818.126	563.628	271.626	131.449	225.788	569.564	901.48	479.718	756.898
Firmicutes	Bacilli	Lactobacillales	Aerococcaceae	sf_1	3866	20396	AF349724.1	Turicibacter sanguinis	0.455	1	0.929	0.5	0.545	0.455	0.846	0.846	0.786	0.857	0.867	0.933	0.5	0.5	0.733	0.929	0.769	0.6	0.714	0.385	0.769	0.846	0.75	0.786	0.867	0.917	0.583	0.571	0.714	0.75		146.577	1029.84	631.809	77.1887	96.6208	104.7	199.548	198.888	309.092	212.113
Firmicutes	Clostridia	Clostridiales	Clostridiaceae	sf_12	4198	19089	AF132255.1	adult human fecal matter clone adhufec269	0.692	0.692	0.917	0.6	0.545	0.636	0.6	0.636	0.727	0.727	0.7	0.833	0.7	0.636	0.636	0.6	0.6	0.6	0.545	0.6	0.7	0.6	0.6	0.545	0.667	0.818	0.6	0.636	0.818	0.727		919.337	1466.69	1271.8	404.508	377.495	416.069	371.019	272.39	427.905	344.457
Firmicutes	Clostridia	Clostridiales	Unclassified	sf_17	2683	NA			1	0.917	1	1	0.9	0.818	0.818	0.818	0.818	0.818	0.818	0.818	0.818	0.727	0.818	0.9	0.9	0.818	0.833	0.818	0.818	0.818	0.818	0.818	0.818	0.818	0.818	0.818	0.818	0.818		4266.89	3234.19	2969.05	1387.44	1122.37	1472.17	668.837	820.412	856.704	974.45
Firmicutes	Clostridia	Clostridiales	Lachnospiraceae	sf_5	3007	NA			1	1	0.833	0.727	0.636	0.7	0.818	0.727	0.727	0.909	0.818	0.818	0.818	0.636	0.727	0.727	0.636	0.545	0.727	0.8	0.727	0.727	0.636	0.545	0.909	0.727	0.636	0.818	0.818	0.909		1790.17	1225.27	610.9	385.943	449.399	546.261	422.159	346.973	276.932	492.21
Bacteroidetes	Bacteroidetes	Bacteroidales	Prevotellaceae	sf_1	5946	72779	AF385511.1	tongue dorsa clone DO027	1	1	1	1	0.889	1	0.842	0.947	0.947	0.947	1	1	1	0.882	0.632	0.647	0.778	0.526	1	0.842	0.842	0.842	0.765	0.842	0.947	0.895	0.842	0.895	0.895	0.895		2670.71	1464.77	1574.52	961.438	814.536	1270.06	501.377	538.294	1008.57	712.481
Firmicutes	Clostridia	Clostridiales	Lachnospiraceae	sf_5	2963	NA			1	1	1	0.333	0.333	0.444	0.5	0.5	0.444	0.5	0.5	0.5	0.444	0.444	0.364	0.444	0.4	0.4	1	0.556	0.5	0.5	0.444	0.4	0.5	0.556	0.556	0.5	0.7	0.9		350.275	960.867	596.355	49.8307	49.4339	91.0435	295.812	292.927	673.571	295.508
Firmicutes	Clostridia	Clostridiales	Lachnospiraceae	sf_5	2748	NA			0.842	0.889	0.824	0.429	0.462	0.429	0.4	0.429	0.429	0.688	0.733	0.625	0.429	0.286	0.267	0.385	0.357	0.267	0.611	0.643	0.438	0.4	0.357	0.286	0.611	0.733	0.5	0.875	1	0.875		583.073	561.384	743.626	126.042	177.513	277.683	97.2671	109.172	186.706	154.099
Firmicutes	Clostridia	Clostridiales	Lachnospiraceae	sf_5	2781	34221	AB034118.1	rumen clone 2C28d-12	0.727	0.727	1	0.4	0.625	0.6	0.3	0.6	0.6	0.8	0.9	0.6	0.778	0.556	0.111	0.5	0.5	0.2	0.3	0.444	0.091	0.3	0.4	0.1	0.818	0.778	0.1	0.727	0.818	0.818		189.687	296.02	379.994	50.8077	60.6689	140.207	42.1157	73.502	111.666	114.215
Firmicutes	Bacilli	Bacillales	Bacillaceae	sf_1	3509	50925	AY043085.1	Bacillus benzoevorans	0.88	0.783	0.9	0.263	0.278	0.263	0.636	0.478	0.5	0.792	0.826	0.667	0.773	0.3	0.591	0.905	0.412	0.278	0.833	0.476	0.833	0.211	0.267	0.35	0.833	0.714	0.409	0.833	0.833	0.833		442.963	1391.01	1543.61	38.1058	41.5694	73.7453	102.281	78.9066	96.4797	242.933
Firmicutes	Clostridia	Clostridiales	Lachnospiraceae	sf_5	3107	16477	AF202259.1	oxidoreducens str. G2-2	1	0.917	0.923	0.923	0.769	0.923	0.846	0.846	0.583	0.846	0.846	0.923	0.6	0.545	0.385	0.583	0.5	0.462	0.857	0.692	0.615	0.538	0.5	0.462	0.917	0.667	0.636	0.769	0.846	0.769		2264.39	1441.78	979.077	486.582	481.981	626.38	278.766	302.655	487.758	357.147
Firmicutes	Clostridia	Clostridiales	Lachnospiraceae	sf_5	4500	16076	X85099.1	Ruminococcus bromii	0.933	1	0.933	0.417	0.333	0.333	0.769	0.769	0.692	0.769	0.769	0.846	0.615	0.538	0.538	0.75	0.667	0.538	0.769	0.692	0.692	0.769	0.75	0.615	0.714	0.846	0.692	0.833	0.714	0.769		1424.81	1554.82	1125.44	118.226	73.0274	194.833	319.878	375.076	408.252	553.85
Firmicutes	Clostridia	Clostridiales	Lachnospiraceae	sf_5	2966	NA			0.706	0.857	0.933	0.714	0.8	0.8	0.375	0.4	0.6	0.688	0.667	0.5	0.714	0.5	0.286	0.5	0.615	0.2	0.412	0.643	0.312	0.294	0.75	0.357	0.529	0.769	0.4	0.867	0.867	0.867		314.708	391.819	630.9	234.497	289.863	457.949	49.1349	71.3402	204.573	86.1142
Firmicutes	Bacilli	Lactobacillales	Streptococcaceae	sf_1	3340	NA			0.647	1	0.957	0.471	0.5	0.588	0.529	0.368	0.5	0.526	0.526	0.412	0.471	0.375	0.353	0.526	0.353	0.375	0.579	0.474	0.526	0.438	0.368	0.375	0.5	0.588	0.316	0.556	0.647	0.625		519.484	1775.16	1519.07	356.631	424.682	415.159	554.523	458.307	413.612	400.657
Bacteroidetes	Bacteroidetes	Bacteroidales	Prevotellaceae	sf_1	6236	NA			0.941	0.778	0.75	0.714	0.667	0.667	0.688	0.733	0.786	0.667	0.625	0.812	0.769	0.769	0.625	0.714	0.786	0.733	0.667	0.786	0.667	0.786	0.714	0.688	0.75	0.714	0.667	0.667	0.733	0.733		3212.83	1633.38	2261.79	800.222	949.356	878.57	694.908	638.819	1077.36	871.113
Firmicutes	Clostridia	Clostridiales	Lachnospiraceae	sf_5	4581	49817	AF371763.1	swine intestine clone p-594-a5	0.611	1	0.737	0.176	0.176	0.353	0.389	0.444	0.529	0.529	0.5	0.556	0.25	0.125	0.294	0.278	0.389	0.222	0.278	0.353	0.167	0.444	0.389	0.389	0.647	0.444	0.389	0.471	0.625	0.529		114.243	304.642	221.815	34.1975	30.3344	93.7748	81.223	136.195	240.306	137.783
Chloroflexi	Anaerolineae	Chloroflexi-1a	Unclassified	sf_1	537	67537	AF234698.1	sludge clone A30	0.5	0.375	0.375	0.25	0.25	0.429	0.273	0.364	0.375	1	0.909	0.545	0.286	0.286	0.222	0.286	0.2	0.222	0.222	0.222	0.222	0.333	0.333	0.273	0.5	0.333	0.182	0.4	0.9	0.455		638.039	203.095	479.993	69.3721	62.9159	302.265	97.2671	109.172	218.866	250.184
Firmicutes	Clostridia	Clostridiales	Peptostreptococcaceae	sf_5	2869	51973	AF450134.1	Frigovirgula patagoniensis str. PPP2	0.353	0.826	0.636	0	0	0.083	0.238	0.25	0.077	0.421	0.3	0.421	0	0	0	0.176	0.125	0.053	0.667	1	0.88	0.125	0	0.118	0.739	0.263	0.316	0.429	0.5	0.429		640.194	872.732	592.719	6.8395	5.61749	16.3878	35.0964	52.9647	25.0132	89.74
Firmicutes	Clostridia	Clostridiales	Lachnospiraceae	sf_5	2991	72301	AB034063.1	rumen clone 3C3d-8	1	1	1	0.741	0.72	0.808	0.828	0.793	0.815	0.897	0.897	0.931	0.786	0.75	0.778	0.786	0.731	0.714	0.966	0.931	0.828	0.75	0.731	0.75	1	0.897	0.793	0.931	0.966	1		2759.09	2467.79	2378.15	711.308	650.505	898.6	754.071	807.441	852.237	952.695
Firmicutes	Bacilli	Lactobacillales	Streptococcaceae	sf_1	3397	15436	Z94012.1	Streptococcus macedonicus str. ACA-DC 206 LAB617	1	1	1	0.684	0.722	0.833	0.8	0.8	0.833	0.95	0.9	0.95	0.778	0.75	0.833	0.778	0.765	0.737	1	0.95	0.9	0.684	0.765	0.789	1	0.95	0.85	0.95	0.95	1		3314.14	3483.26	2873.59	1117.77	1315.62	1502.22	952.616	1087.4	1156.86	1176.59
Firmicutes	Clostridia	Clostridiales	Lachnospiraceae	sf_5	2753	81160	AY169422.1	Clostridium clostridioforme	1	0.941	1	0.583	0.5	0.727	0.692	0.75	0.727	0.692	0.75	0.75	0.75	0.583	0.615	0.727	0.818	0.667	0.769	0.692	0.692	0.8	0.462	0.667	0.75	0.75	0.692	0.75	0.818	0.75		1880.71	1758.88	1405.43	180.758	174.142	396.95	337.928	362.105	433.265	533.908
Bacteroidetes	Bacteroidetes	Bacteroidales	Prevotellaceae	sf_1	5720	68339	AF481227.1	Prevotella sp. str. E9_34	0.941	0.882	0.875	0.538	0.583	0.538	0.615	0.5	0.583	0.688	0.6	0.8	0.5	0.583	0.583	0.538	0.583	0.5	0.882	0.583	0.5	0.538	0.636	0.5	0.875	0.583	0.467	0.5	0.667	0.688		2304.27	1140.01	1129.07	706.423	470.746	641.857	711.955	590.178	763.797	524.843
Proteobacteria	Gammaproteobacteria	Enterobacteriales	Enterobacteriaceae	sf_1	9098	NA			1	1	0.778	0.375	0.429	0.875	0.4	0.6	0.6	0.5	1	1	0.5	0.667	0.5	0.6	0.571	0.4	0.909	0.6	1	0.5	0.571	0.8	0.9	0.9	0.5	0.889	0.778	0.9		1076.69	645.688	332.722	154.377	199.983	469.785	93.2561	144.842	237.626	151.38
Bacteroidetes	Bacteroidetes	Bacteroidales	Bacteroidaceae	sf_12	6022	NA			0.8	0.882	0.941	0	0	0.188	0.667	0.625	0.062	0.733	0.75	0.706	0.133	0	0	0.077	0.067	0.067	0.824	0.75	0.647	0.417	0.125	0.2	0.941	0.706	0.529	0.765	0.882	0.824		899.937	324.76	931.805	24.4268	16.8525	40.9696	110.303	124.305	37.5199	233.868
Firmicutes	Clostridia	Clostridiales	Lachnospiraceae	sf_5	4290	51306	AF371734.1	swine intestine clone p-2576-9F5	0.818	0.909	0.636	0.25	0.25	0.286	0.25	0.5	0.429	0.5	0.5	0.444	0.286	0.286	0.333	0.429	0.286	0.25	0.5	0.571	0.571	0.25	0.286	0.25	0.667	0.5	0.375	0.5	0.5	0.5		999.091	926.38	525.447	196.391	242.676	320.473	122.336	150.247	279.612	244.746
Bacteroidetes	Bacteroidetes	Bacteroidales	Prevotellaceae	sf_1	6125	29831	AB078827.2	Bacteroidales str. KB7	0.889	0.909	0.875	0.833	0.833	0.714	0.455	0.636	0.625	0.909	0.909	0.909	0.625	0.833	0.625	0.556	0.556	0.455	0.818	0.556	0.455	0.7	0.8	0.727	0.909	1	0.8	0.9	0.9	0.9		2942.31	1467.65	2459.06	1023.97	1097.66	970.524	489.344	603.149	756.651	744.208
Firmicutes	Clostridia	Clostridiales	Clostridiaceae	sf_12	4620	51722	AF371805.1	swine intestine clone p-1877-s962-3	0.933	0.875	0.929	0.583	0.462	0.583	0.538	0.5	0.538	0.769	0.692	0.769	0.429	0.5	0.357	0.667	0.429	0.375	0.571	0.583	0.385	0.5	0.308	0.357	0.846	0.692	0.286	0.692	0.846	0.769		558.284	421.517	636.354	177.827	290.986	416.979	91.2506	134.033	225.119	221.177
Proteobacteria	Gammaproteobacteria	Enterobacteriales	Enterobacteriaceae	sf_1	8632	9847	AB018593.1	Selenate-reducing isolate str. TSA	0.75	0.923	0.583	0.231	0.375	0.333	0.75	0.75	0.5	0.692	0.643	0.75	0.5	0.364	0.455	0.583	0.25	0.25	0.786	0.833	0.857	0.583	0.364	0.636	1	0.846	0.692	0.769	0.917	0.833		1462.53	1037.51	264.542	36.1517	53.9279	52.8052	117.322	166.46	102.733	141.409
Firmicutes	Clostridia	Clostridiales	Lachnospiraceae	sf_5	2849	13949	X89975.1	Butyrivibrio fibrisolvens str. NCDO 2435	0.926	0.963	0.923	0.75	0.826	0.833	0.815	0.852	0.875	0.889	0.926	0.963	0.68	0.696	0.75	0.692	0.808	0.72	0.885	0.8	0.815	0.808	0.64	0.778	0.926	0.846	0.808	0.889	0.963	0.963		2889.5	2332.71	1984.52	819.763	853.859	1055.19	972.671	816.088	1002.32	975.356
Firmicutes	Clostridia	Clostridiales	Lachnospiraceae	sf_5	2756	109015	AY804149.1	Roseburia faecalis str. M6/1	1	1	1	0.733	0.733	0.8	1	0.933	0.929	0.933	0.933	1	0.929	0.714	0.714	0.929	0.857	0.714	0.933	0.933	0.867	0.867	0.857	0.8	1	0.933	0.867	0.933	0.933	1		3332.46	3142.22	2841.78	733.781	652.752	979.628	881.42	1121.99	1064.85	1169.34
Firmicutes	Clostridia	Clostridiales	Lachnospiraceae	sf_5	2733	77371	AF349421.1	pig feces clone	1	1	1	0.526	0.556	0.556	0.7	0.6	0.611	0.864	0.727	0.818	0.588	0.556	0.471	0.526	0.526	0.632	0.826	0.762	0.714	0.579	0.474	0.524	0.957	0.727	0.65	0.864	0.955	0.955		2699.81	2379.66	2087.24	1060.12	1369.54	1080.69	1081.97	945.798	1017.5	873.832
Firmicutes	Clostridia	Clostridiales	Peptococc/Acidaminococc	sf_11	49	51930	AF351223.1	coal tar-contaminated groundwater clone 36-28	0.917	0.929	0.6	0.25	0.273	0.5	0.273	0.5	0.545	0.545	0.636	0.5	0.364	0.182	0.25	0.455	0.273	0.364	0.538	0.385	0.357	0.4	0.111	0.545	0.786	0.7	0.167	0.545	1	0.7		284.531	282.608	178.179	42.9912	33.7049	105.61	42.1157	89.7157	94.693	73.4237
Firmicutes	Clostridia	Clostridiales	Lachnospiraceae	sf_5	2731	NA			0.946	0.944	0.971	0.469	0.433	0.548	0.441	0.419	0.536	0.531	0.484	0.576	0.567	0.469	0.367	0.448	0.433	0.414	0.6	0.469	0.548	0.433	0.464	0.433	0.727	0.5	0.406	0.562	0.625	0.6		1472.23	1517.46	1336.34	510.031	521.303	689.2	622.71	668.003	752.184	700.697
Firmicutes	Clostridia	Clostridiales	Peptococc/Acidaminococc	sf_11	181	58262	AF548373.1	Allisonella histaminiformans str. MR2	1	1	1	0.727	0.778	0.8	0.8	0.8	0.889	0.727	0.727	0.8	0.8	0.8	0.6	0.8	0.7	0.636	0.727	0.6	0.727	0.8	0.75	0.7	0.8	0.889	0.636	0.727	0.8	0.727		2823.75	1292.33	1038.17	415.255	428.053	701.035	480.319	565.317	822.757	531.188
Firmicutes	Clostridia	Clostridiales	Clostridiaceae	sf_12	2757	18180	AJ308396.2	mouse feces clone C13-5	0.913	0.913	0.913	0.55	0.476	0.579	0.455	0.429	0.524	0.591	0.565	0.682	0.571	0.579	0.35	0.429	0.4	0.3	0.565	0.609	0.5	0.45	0.4	0.35	0.696	0.571	0.364	0.522	0.7	0.652		538.884	448.341	685.445	347.837	489.845	339.592	118.325	125.386	255.492	181.293
Bacteroidetes	Bacteroidetes	Bacteroidales	Bacteroidaceae	sf_12	5950	NA			1	1	1	0.938	0.938	0.938	0.938	0.938	0.938	0.938	0.938	0.938	0.938	0.938	0.938	0.938	0.938	0.875	0.938	0.938	0.938	0.938	0.875	0.938	0.938	0.938	0.938	0.938	0.938	0.938		2698.73	1523.21	1557.25	1217.43	1383.03	1606.01	873.398	789.066	1177.41	783.186
Firmicutes	Bacilli	Lactobacillales	Leuconostocaceae	sf_1	3485	48808	AY040669.1	Weissella hanii str. IH1012	0.545	0.9	0.818	0.583	0.545	0.636	0.75	0.9	0.727	0.75	0.818	0.818	0.727	0.727	0.615	0.9	0.667	0.636	0.769	0.75	0.833	0.727	0.667	0.727	0.833	0.818	0.583	0.909	0.909	0.714		593.85	898.598	582.719	232.543	185.377	322.294	259.713	337.244	407.359	280.098
Proteobacteria	Gammaproteobacteria	Enterobacteriales	Enterobacteriaceae	sf_1	9391	NA			0.938	0.706	0.4	0.471	0.471	0.588	0.625	0.625	0.588	0.688	0.625	0.722	0.588	0.5	0.5	0.688	0.529	0.4	0.824	0.688	0.647	0.562	0.412	0.529	0.765	0.706	0.688	0.688	0.765	0.75		1567.08	534.56	322.723	390.829	472.993	413.338	348.958	316.707	319.812	329.953
Bacteroidetes	Bacteroidetes	Bacteroidales	Prevotellaceae	sf_1	6152	2069	AF001768.1	rumen clone RF37	0.929	0.929	1	1	1	0.929	1	0.929	1	0.929	1	0.929	1	0.929	0.929	0.929	1	0.929	1	1	0.929	1	1	1	1	1	0.929	1	1	1		2970.33	1503.09	2147.24	1010.29	1023.51	1321.04	2003.5	1676.49	2231.54	1650.67
Firmicutes	Clostridia	Clostridiales	Lachnospiraceae	sf_5	3162	40464	AB034122.1	rumen clone 2C28d-7	0.923	0.923	0.667	0.6	0.636	0.636	0.5	0.636	0.636	0.615	0.727	0.727	0.545	0.6	0.4	0.636	0.636	0.545	0.462	0.583	0.727	0.636	0.636	0.5	0.667	0.636	0.5	0.636	0.8	0.727		288.842	486.661	555.446	108.455	169.648	259.474	96.2643	125.386	201.893	134.157
Firmicutes	Clostridia	Clostridiales	Lachnospiraceae	sf_5	2693	14081	AB008552.1	ruminantium str. GA195	1	1	1	0.583	0.545	0.833	1	0.917	0.917	1	1	0.917	0.833	0.545	0.583	1	0.909	1	1	1	1	0.917	0.583	0.917	1	1	0.917	0.917	1	1		3311.98	2508.03	2088.15	1240.88	758.361	675.543	1395.83	1290.61	1662.49	1270.86
Bacteroidetes	Flavobacteria	Flavobacteriales	Flavobacteriaceae	sf_1	5918	28957	AJ318191.1	Waste-gas biofilter clone BIui38	0.5	0.85	0.579	0.8	0.684	0.714	0.579	0.579	0.667	0.632	0.55	0.737	0.684	0.684	0.632	0.556	0.333	0.5	0.65	0.235	0.211	0.389	0.294	0.421	0.905	0.65	0.632	0.5	0.75	0.6		167.054	461.753	367.267	256.97	230.317	285.877	157.432	176.189	311.772	175.854
Spirochaetes	Spirochaetes	Spirochaetales	Spirochaetaceae	sf_1	6578	46814	AB032004.1	protist termite clone HsPySp20 clone	0.5	0.786	0.538	0.636	0.636	0.636	0.714	0.643	0.583	0.857	0.786	0.857	0.636	0.6	0.429	0.333	0.667	0.5	0.733	0.5	0.615	0.5	0.667	0.583	0.857	0.75	0.538	0.846	0.929	0.923		1111.18	673.469	542.719	318.525	305.591	469.785	339.933	301.574	346.612	377.996
Bacteroidetes	Bacteroidetes	Bacteroidales	Prevotellaceae	sf_1	5769	69843	AB081578.1	Bacteroidaceae str. A42	0.976	1	0.977	0.846	0.684	0.846	0.884	0.932	0.875	1	1	1	0.854	0.75	0.707	0.605	0.818	0.727	1	0.786	0.841	1	0.907	0.977	1	0.977	1	1	1	1		3117.98	2092.26	2314.51	1174.44	1022.38	1056.1	969.663	923.099	951.397	999.831
Bacteroidetes	Unclassified	Unclassified	Unclassified	sf_1	5745	NA			0.944	0.944	0.944	0.4	0.364	0.5	0.944	0.944	0.833	1	0.944	0.889	0.833	0.5	0.4	0.882	0.941	0.706	0.944	0.944	0.944	0.941	0.889	0.889	0.944	0.944	0.889	0.944	0.944	0.944		3883.2	2850.03	3368.13	183.689	128.079	259.474	955.624	997.681	335.892	1636.17
Proteobacteria	Gammaproteobacteria	Enterobacteriales	Enterobacteriaceae	sf_1	9082	10196	AJ223469.1	Brenneria quercina str. LMG 2724-T	0.867	0.8	0.769	0.571	0.385	0.583	0.643	0.714	0.692	0.714	0.846	0.714	0.615	0.417	0.167	0.833	0.615	0.385	0.6	0.846	0.786	0.5	0.667	0.692	0.867	1	0.714	0.857	1	1		1449.6	699.335	529.083	85.9823	94.3738	172.072	133.366	226.991	207.253	220.271
Bacteroidetes	Flavobacteria	Flavobacteriales	Flavobacteriaceae	sf_1	6149	NA			0.5	0.5	0.625	0.727	0.636	0.889	0.545	0.545	0.7	0.625	0.556	0.6	0.818	0.909	0.7	0.125	0.111	0	0.3	0.556	0.3	0.222	0.222	0.333	0.667	0.5	0.444	0.625	0.667	0.5		150.888	111.127	195.452	511.008	515.686	776.601	115.317	105.929	363.585	97.8982
Firmicutes	Clostridia	Clostridiales	Lachnospiraceae	sf_5	3156	NA			0.529	0.588	0.786	0.385	0.308	0.643	0.308	0.462	0.538	0.467	0.467	0.438	0.533	0.429	0.2	0.429	0.357	0.267	0.4	0.538	0.333	0.308	0.4	0.286	0.625	0.538	0.231	0.429	0.929	0.714		232.798	227.044	323.632	65.4638	60.6689	152.953	41.1129	63.7738	136.68	62.5461
Bacteroidetes	Bacteroidetes	Bacteroidales	Bacteroidaceae	sf_12	5596	46819	AF445205.2	Swine fecal isolate str. FPC111	0.941	0.882	0.778	0.412	0.471	0.471	0.529	0.588	0.529	0.733	0.625	0.812	0.412	0.438	0.471	0.5	0.5	0.533	0.529	0.588	0.588	0.533	0.312	0.471	0.875	0.562	0.375	0.438	0.688	0.625		1437.74	838.244	868.169	357.608	392.101	393.308	413.134	423.717	427.905	493.117
Bacteroidetes	Bacteroidetes	Bacteroidales	Prevotellaceae	sf_1	6207	83758	AY244912.1	cow rumen clone BF34	0.773	0.762	0.85	0.889	0.833	0.833	0.842	0.789	0.85	0.842	0.842	0.8	0.85	0.8	0.611	0.737	0.789	0.722	0.75	0.833	0.737	0.833	0.882	0.833	0.905	0.842	0.789	0.895	0.85	0.762		2699.81	1915.03	2271.79	1142.2	1172.93	1212.7	949.608	907.966	969.263	1055.13
Firmicutes	Clostridia	Clostridiales	Lachnospiraceae	sf_5	4443	23994	AF371775.1	swine intestine clone p-3567-9F3	0.923	0.938	0.929	0.538	0.462	0.917	0.538	0.615	0.769	0.923	0.929	0.786	0.667	0.545	0.455	0.692	0.571	0.615	0.643	0.583	0.429	0.615	0.429	0.533	0.8	0.769	0.429	0.929	1	0.929		480.685	573.838	484.538	591.128	513.439	834.869	388.066	388.047	618.184	304.572
Proteobacteria	Gammaproteobacteria	SAR86	Unclassified	sf_1	9620	102716	AACY01004374.1	Sargasso Sea	0.421	0.333	0.158	1	1	1	0.294	0.263	0.455	0.278	0.273	0.421	0.368	0.286	0.235	0.222	0.167	0.235	0.35	0.105	0.2	0.235	0.235	0.2	0.381	0.3	0.105	0.409	0.429	0.286		154.121	158.069	68.1808	2037.19	1854.9	2214.18	51.1404	54.0456	96.4797	61.6396
Firmicutes	Clostridia	Clostridiales	Clostridiaceae	sf_12	4424	77738	AB088982.1	termite gut homogenate clone Rs-M05 bacterium	0.923	0.846	0.818	0.833	0.833	0.917	0.917	0.917	1	0.917	0.846	0.917	0.917	0.917	0.667	0.583	0.667	0.667	0.75	0.917	0.917	0.667	0.727	0.833	0.917	0.917	0.917	0.846	0.923	0.923		2296.72	1749.3	2125.42	796.313	680.84	940.48	799.195	901.48	903.157	1200.16
Bacteroidetes	Flavobacteria	Flavobacteriales	Flavobacteriaceae	sf_1	6246	23229	AF385569.1	crevicular epithelial cells clone BU084	0.625	0.636	0.75	0.909	0.9	0.727	0.636	0.75	1	0.667	0.75	0.667	0.909	0.833	0.615	0.636	0.667	0.417	0.5	0.667	0.231	0.818	0.583	0.462	0.583	0.727	0.308	0.667	0.909	0.909		436.496	177.229	569.083	209.093	264.022	424.263	178.49	175.108	486.865	163.164
Bacteroidetes	Unclassified	Unclassified	Unclassified	sf_4	6190	NA			0.636	0.8	0.8	0.917	0.917	1	0.818	0.818	0.909	0.727	0.727	0.8	0.909	0.909	0.818	0.7	0.8	0.636	0.8	0.8	0.8	0.8	0.8	0.8	0.8	0.8	0.8	0.727	0.8	0.8		1629.59	952.245	1199.98	861.777	789.819	1288.27	1832.03	1493.82	1961.75	1230.07
Bacteroidetes	Bacteroidetes	Bacteroidales	Prevotellaceae	sf_1	5966	26715	AJ315483.1	human colonic sample clone	0.5	0.917	0.875	0.389	0.471	0.444	0.421	0.368	0.35	0.474	0.45	0.4	0.389	0.353	0.368	0.294	0.312	0.235	0.474	0.444	0.421	0.333	0.375	0.4	0.45	0.316	0.318	0.444	0.444	0.5		935.503	809.504	680.899	539.344	458.387	360.532	530.457	464.792	382.345	420.6
Bacteroidetes	Bacteroidetes	Bacteroidales	Bacteroidaceae	sf_12	5474	1992	AB021159.1	Bacteroides acidofaciens str.A24	1	1	1	0.857	0.821	0.786	0.939	0.909	0.875	0.939	0.909	0.939	0.875	0.9	0.875	0.774	0.774	0.806	0.97	0.875	0.939	0.903	0.8	0.875	0.97	0.906	0.848	0.909	0.939	0.909		4108.45	2669.93	3461.77	1363.99	1341.46	1307.39	1607.41	1623.53	1540.1	1576.34
Proteobacteria	Deltaproteobacteria	Desulfobacterales	Desulfobacteraceae	sf_5	9885	10903	AJ012596.1	Sulfate reducing field soil and on rice roots Desulfobacteriaceae	0.714	0.714	0.692	0.933	0.933	0.933	0.667	0.667	0.714	0.667	0.714	0.733	0.667	0.6	0.8	0.667	0.786	0.733	0.733	0.615	0.6	0.733	0.467	0.6	0.733	0.714	0.6	0.643	0.714	0.714		583.073	303.684	309.086	281.397	242.676	502.56	131.361	183.755	457.385	208.487
Proteobacteria	Gammaproteobacteria	Unclassified	Unclassified	sf_3	8213	NA			0.471	0.529	0.611	0.947	0.889	1	0.556	0.722	0.722	0.667	0.789	0.706	0.833	0.688	0.333	0.579	0.588	0.389	0.5	0.556	0.529	0.647	0.529	0.471	0.895	0.706	0.5	0.737	0.895	0.842		1179.08	468.459	321.814	626.303	481.981	818.481	214.589	269.147	230.479	332.673
Firmicutes	Clostridia	Clostridiales	Lachnospiraceae	sf_5	3089	81272	AY169419.1	Ruminococcus obeum	1	1	1	0.765	0.735	0.848	0.971	0.912	0.824	0.917	0.917	0.972	0.882	0.794	0.758	0.758	0.818	0.758	1	0.914	0.943	0.818	0.697	0.824	0.972	0.972	0.882	0.917	1	1		3680.58	3025.34	2732.69	1391.35	1443.7	1622.4	1719.72	1591.1	1554.39	1523.77
Firmicutes	Clostridia	Clostridiales	Lachnospiraceae	sf_5	4563	37047	AF371726.1	swine intestine clone p-1706-b3	0.975	0.975	0.975	0.818	0.758	0.727	0.853	0.794	0.788	0.853	0.853	0.848	0.794	0.871	0.686	0.735	0.794	0.765	0.816	0.771	0.73	0.824	0.765	0.735	0.909	0.844	0.771	0.853	0.909	0.879		3667.65	2929.54	2480.87	1345.43	1348.2	1585.07	1466.03	1586.78	1535.63	1696.9
Firmicutes	Clostridia	Clostridiales	Lachnospiraceae	sf_5	4212	81416	AB100488.1	termite gut clone Rs-061	1	1	1	0.923	0.923	0.923	0.923	0.923	1	0.923	1	1	1	1	0.846	1	0.923	0.923	1	0.923	0.923	0.923	0.923	0.923	1	0.923	0.923	1	1	1		3234.38	2644.06	2652.69	899.883	802.178	1025.15	1581.34	1487.33	1385.56	1991.5
OD2	Unclassified	Unclassified	Unclassified	sf_1	10424	37981	AF367483.1	deep-sea hydrothermal vent clone VC1.2-cl04	0.786	0.929	0.786	0.583	0.417	0.714	0.857	0.714	0.846	1	1	1	0.643	0.583	0.667	0.846	0.571	0.5	1	1	1	0.643	0.571	0.714	0.929	1	0.786	0.786	1	0.857		796.471	828.664	1134.53	165.125	135.943	193.012	320.881	365.348	361.799	432.384
Firmicutes	Bacilli	Lactobacillales	Streptococcaceae	sf_1	3313	80129	AY188352.1	Streptococcus salivarius str. ATCC 7073	0.875	1	0.933	0.769	0.714	0.692	0.667	0.786	0.786	0.786	0.786	0.733	0.75	0.692	0.692	0.769	0.714	0.714	0.733	0.786	0.733	0.714	0.769	0.786	0.733	0.786	0.786	0.786	0.786	0.786		1533.66	2704.42	2294.51	1017.13	949.356	1205.42	630.732	869.053	887.97	961.759
Proteobacteria	Gammaproteobacteria	Enterobacteriales	Enterobacteriaceae	sf_1	9368	10115	AJ233424.1	Pragia fontium str. DSM 5563	0.8	0.9	0.778	0.5	0.333	0.375	0.778	0.889	0.667	0.889	0.889	0.889	0.889	0.5	0.667	0.889	0.556	0.556	0.727	0.778	0.889	1	0.778	1	0.818	1	0.9	0.889	1	0.889		1201.71	441.635	190.906	137.767	84.2624	183.908	132.363	145.923	163.479	230.242
Actinobacteria	Actinobacteria	Actinomycetales	Cellulomonadaceae	sf_1	2061	38534	AB078841.1	rice straw paddy soil isolate str. WB2	0.75	0.75	0.65	0.647	0.588	0.444	0.6	0.7	0.619	0.65	0.762	0.913	0.684	0.55	0.545	0.579	0.684	0.5	0.632	0.579	0.524	0.65	0.55	0.6	0.826	0.737	0.524	0.85	0.85	0.905		1091.78	917.758	898.169	783.611	578.602	547.172	448.231	504.786	879.93	408.816
Firmicutes	Clostridia	Clostridiales	Peptococc/Acidaminococc	sf_11	579	13851	AF071415.1	Anaeromusa acidaminophila str. DSM 3853	0.375	0.909	0.556	0.111	0	0.111	0.556	0.333	0.333	0.778	0.333	0.333	0.222	0.25	0.111	0	0	0.111	0.818	0.444	0.444	0.111	0.111	0	0.444	0.375	0.111	0.444	0.889	0.6		61.4328	471.333	242.724	35.1746	29.211	58.2679	56.1542	67.0165	69.6798	130.531
Firmicutes	Clostridia	Clostridiales	Lachnospiraceae	sf_5	3111	27777	AB034059.1	rumen clone 6C3d-11	1	1	1	0.895	0.842	0.842	1	0.95	1	0.95	1	1	0.95	0.85	0.9	0.85	0.9	0.9	0.95	0.9	0.9	0.85	0.8	0.9	0.95	0.95	0.9	1	1	1		3380.96	3080.91	2782.69	1036.67	977.443	1320.13	1682.62	1580.29	1616.03	1706.87
Proteobacteria	Gammaproteobacteria	Pasteurellales	Pasteurellaceae	sf_1	8432	NA			1	1	0.889	0.833	0.833	0.833	0.944	0.944	0.889	0.944	0.944	0.944	0.833	0.778	0.833	0.833	0.833	0.833	0.889	0.833	0.833	0.833	0.667	0.833	0.944	0.889	0.833	0.833	0.889	0.833		3385.27	1422.62	1206.35	543.252	379.742	651.872	1266.48	1452.75	1046.98	1498.39
Firmicutes	Clostridia	Clostridiales	Lachnospiraceae	sf_5	4331	32842	AF332720.1	granular sludge clone UASB_brew_B84	1	1	1	1	0.917	0.917	1	1	1	1	1	1	1	1	0.917	1	1	1	1	1	1	1	1	1	1	1	1	1	1	1		4362.81	4041.77	3453.59	1517.39	1586.38	1524.07	1978.43	2111.02	1680.35	2273.41
Bacteroidetes	Bacteroidetes	Bacteroidales	Prevotellaceae	sf_1	6047	63123	AY093462.1	deep marine sediment clone MB-A2-107	1	0.917	0.957	0.905	0.857	0.905	0.913	0.955	0.955	0.955	0.955	1	0.957	0.913	0.909	0.909	0.909	0.909	0.955	0.955	0.955	0.955	0.952	0.955	0.957	0.909	0.913	0.957	1	0.957		4570.82	3261.97	3716.31	2391.87	2194.19	2066.69	1838.05	1913.21	1740.21	1871.85
Firmicutes	Clostridia	Clostridiales	Lachnospiraceae	sf_5	2784	43588	AJ408993.1	human colonic clone HuCB12	0.984	1	0.984	0.732	0.698	0.764	0.949	0.879	0.821	0.935	0.952	0.952	0.772	0.727	0.755	0.732	0.75	0.732	0.984	0.917	0.918	0.818	0.698	0.772	0.984	0.952	0.85	0.935	0.984	0.984		3163.25	2749.44	2609.96	1309.28	1445.94	1354.73	1446.97	1476.53	1415.03	1452.16
Proteobacteria	Gammaproteobacteria	Unclassified	Unclassified	sf_3	9492	NA			0.636	0.75	0.7	0.615	0.615	0.846	0.667	0.667	0.833	0.75	0.75	0.75	0.692	0.538	0.5	0.545	0.364	0.273	0.615	0.636	0.5	0.455	0.444	0.364	0.923	0.818	0.583	0.769	1	0.846		254.353	474.207	969.077	296.053	270.763	538.978	193.531	231.315	467.212	330.86
Bacteroidetes	Bacteroidetes	Bacteroidales	Prevotellaceae	sf_1	6109	NA			0.9	0.875	0.775	0.737	0.794	0.778	0.784	0.75	0.921	0.667	0.718	0.897	0.821	0.692	0.771	0.639	0.722	0.706	0.73	0.714	0.743	0.794	0.706	0.75	0.842	0.743	0.706	0.806	0.861	0.757		2738.61	1848.93	2037.24	1335.66	1338.09	1296.46	1274.5	1190.08	1212.25	990.766
Proteobacteria	Gammaproteobacteria	Legionellales	Legionellaceae	sf_1	9617	7998	X73406.1	Legionella feeleii subsp. sgp 2 str. ATCC 35849	0.75	1	0.9	1	0.875	0.889	0.818	0.9	0.8	1	0.9	0.818	0.8	1	0.444	0.889	0.889	0.7	0.818	0.9	0.7	0.889	0.889	0.889	1	0.889	0.778	0.9	0.8	0.9		85.1437	552.762	1763.61	327.319	223.576	555.366	312.859	342.649	430.585	448.7
Proteobacteria	Gammaproteobacteria	Enterobacteriales	Enterobacteriaceae	sf_1	8388	10162	M27040.1	symbiont S of Acyrthosiphon pisum	0.8	0.917	0.76	0.652	0.571	0.682	0.84	0.88	0.92	0.96	0.96	0.92	0.76	0.583	0.68	0.84	0.88	0.72	0.88	0.792	0.96	0.76	0.708	0.8	0.96	0.96	0.92	0.8	0.92	0.92		1146.75	610.242	366.358	207.139	178.636	377.831	209.576	270.228	317.132	264.688
Firmicutes	Clostridia	Clostridiales	Lachnospiraceae	sf_5	2793	71434	AF357572.1	mpn-isolate group 24	1	1	0.957	0.75	0.711	0.769	0.767	0.775	0.756	0.791	0.837	0.767	0.756	0.75	0.575	0.721	0.707	0.585	0.872	0.884	0.844	0.75	0.625	0.605	0.844	0.925	0.634	0.814	0.93	0.884		3562.02	2586.58	2421.78	1310.25	1283.03	1486.74	1350.71	1654.88	1332.85	1585.41
Firmicutes	Clostridia	Clostridiales	Lachnospiraceae	sf_5	4512	28258	AF332711.1	granular sludge clone UASB_brew_B25	1	1	1	1	0.923	0.923	1	1	1	1	1	1	1	1	0.923	1	1	1	1	1	1	1	1	1	1	1	1	1	1	1		4257.19	3904.78	3383.59	1509.58	1567.28	1555.02	1942.33	2079.67	1693.75	2263.44
Bacteroidetes	Bacteroidetes	Bacteroidales	Prevotellaceae	sf_1	5905	26496	AF371893.1	swine intestine clone p-2443-18B5	1	1	1	0.929	0.923	0.923	1	1	1	1	1	0.938	1	0.812	0.867	0.933	0.933	0.933	1	1	1	1	1	1	1	0.933	1	1	1	1		4812.24	3506.26	3811.76	2172.03	2041.4	2260.61	2152.91	2105.62	1898.33	1964.31
Proteobacteria	Gammaproteobacteria	Alteromonadales	Alteromonadaceae	sf_1	9575	NA			0.278	0.286	0.467	0.957	0.905	0.913	0.905	0.636	0.913	0.263	0.25	0.235	0.957	0.955	0.75	0.211	0.312	0.222	0.263	0.278	0.25	0.235	0.222	0.176	0.286	0.529	0.235	0.333	0.5	0.368		216.631	155.195	235.451	1174.44	612.306	1040.63	259.713	124.305	798.637	74.3301
Actinobacteria	Actinobacteria	Coriobacteriales	Coriobacteriaceae	sf_1	1112	27160	AF371712.1	swine intestine clone p-3423-SwA2	0.529	0.667	0.632	0.412	0.588	0.688	0.375	0.412	0.588	0.588	0.611	0.556	0.467	0.412	0.312	0.4	0.294	0.118	0.706	0.611	0.412	0.294	0.235	0.278	0.667	0.706	0.278	0.812	0.933	0.75		280.22	387.029	412.721	82.074	94.3738	180.266	61.168	79.9875	163.479	122.373
Firmicutes	Clostridia	Clostridiales	Lachnospiraceae	sf_5	4281	36596	AF332721.1	granular sludge clone UASB_brew_B86	1	1	1	1	0.923	0.923	1	1	1	1	1	1	1	1	0.923	1	1	1	1	1	1	1	1	1	1	1	1	1	1	1		4138.63	3940.23	3441.77	1600.44	1677.38	1687.04	1989.46	2104.54	1748.25	2306.05
Proteobacteria	Gammaproteobacteria	Enterobacteriales	Enterobacteriaceae	sf_1	8437	25008	AF310622.1	Edwardsiella ictaluri	0.667	0.611	0.5	0.538	0.462	0.467	0.667	0.667	0.529	0.947	0.947	0.789	0.533	0.4	0.5	0.5	0.625	0.412	0.895	0.706	0.895	0.529	0.467	0.5	1	0.944	0.842	0.667	0.947	0.895		1563.84	564.258	199.997	239.383	230.317	278.593	214.589	225.911	208.146	310.011
Bacteroidetes	Bacteroidetes	Bacteroidales	Prevotellaceae	sf_1	5398	102311	AY699286.1	Prevotella ruminicola L16	0.955	0.955	0.909	0.857	0.81	0.81	0.857	0.857	0.857	0.857	0.857	0.857	0.864	0.818	0.81	0.81	0.81	0.81	0.857	0.857	0.905	0.857	0.85	0.857	0.905	0.857	0.857	0.909	0.955	0.955		4184.98	2823.21	3245.41	2460.27	2126.78	2047.57	1883.17	1859.17	1807.21	1877.29
Actinobacteria	Actinobacteria	Actinomycetales	Unclassified	sf_3	1806	NA			0.722	0.609	0.526	0.381	0.45	0.524	0.458	0.636	0.667	0.583	0.542	0.5	0.571	0.522	0.556	0.474	0.55	0.5	0.364	0.571	0.429	0.65	0.4	0.364	0.826	0.619	0.261	0.652	0.958	0.87		349.197	256.742	217.27	71.3262	79.7684	147.491	115.317	167.541	197.426	143.221
Firmicutes	Clostridia	Clostridiales	Lachnospiraceae	sf_5	3087	98638	AY178635.1	Butyrivibrio hungatei str. Su6	0.909	0.955	0.909	0.722	0.722	0.778	0.818	0.818	0.895	0.909	0.909	0.955	0.684	0.722	0.7	0.762	0.762	0.75	0.864	0.762	0.773	0.81	0.65	0.727	0.909	0.857	0.818	0.909	1	0.955		2560.78	2172.73	1972.7	1383.53	1458.3	1410.26	1199.29	1083.07	1133.64	1279.93
Firmicutes	Clostridia	Clostridiales	Lachnospiraceae	sf_5	4316	21306	AF371753.1	swine intestine clone p-241-o5	0.636	0.667	0.7	0.444	0.571	0.571	0.4	0.5	0.5	0.7	0.7	0.636	0.455	0.5	0.455	0.444	0.556	0.4	0.545	0.455	0.273	0.444	0.5	0.364	0.917	0.6	0.25	0.6	0.818	0.8		293.153	412.895	368.176	167.079	221.329	276.772	119.328	122.143	330.532	192.171
Bacteroidetes	Bacteroidetes	Bacteroidales	Prevotellaceae	sf_1	6011	107238	AB185583.1	rumen clone F24-B03	1	1	1	1	0.833	0.917	1	1	1	1	1	0.923	1	0.923	0.917	1	1	1	1	1	1	1	1	1	1	1	1	1	1	1		4789.6	3390.34	3953.58	2379.17	1805.46	1922.84	2147.9	2318.56	2123.45	2342.31
Firmicutes	Clostridia	Clostridiales	Clostridiaceae	sf_12	4477	78383	AB089042.1	termite gut homogenate clone Rs-N85 bacterium	0.952	0.905	0.905	1	0.95	0.95	0.95	1	1	0.95	0.905	0.95	1	0.95	0.95	0.95	1	0.95	1	1	0.95	0.95	1	0.95	1	0.95	0.95	0.952	0.905	0.905		3604.06	3108.69	2739.96	1266.28	1308.88	1511.32	1849.08	1914.29	1599.06	2109.34
Actinobacteria	Actinobacteria	Actinomycetales	Nocardiaceae	sf_1	1999	99518	AB180236.2	Rhodococcus fascians str. DFA7	0.474	0.591	0.5	0.421	0.421	0.632	0.35	0.333	0.526	0.619	0.682	0.435	0.474	0.368	0.263	0.211	0.3	0.143	0.333	0.368	0.375	0.333	0.211	0.316	0.76	0.75	0.333	0.55	0.905	0.955		286.686	173.397	186.361	59.6014	57.2984	136.565	47.1294	62.6929	97.373	85.2077
Synergistes	Unclassified	Unclassified	Unclassified	sf_3	512	1634	U50711.1	Anaerobaculum thermoterrnum	0.667	0.533	0.909	0.364	0.545	0.727	0.462	0.429	0.455	0.438	0.438	0.533	0.364	0.417	0.385	0.545	0.417	0.4	0.429	0.571	0.5	0.385	0.462	0.385	0.667	0.571	0.385	0.4	0.667	0.6		317.942	222.254	274.541	223.749	120.214	208.49	131.361	144.842	188.493	138.689
Bacteroidetes	Flavobacteria	Flavobacteriales	Flavobacteriaceae	sf_1	6157	59536	AF538774.1	municipal wastewater treatment bioreactor clone LB-Q bacterium	0.429	0.929	0.778	0.273	0.25	0.227	0.5	0.5	0.52	0.593	0.538	0.679	0.346	0.348	0.48	0.5	0.5	0.565	0.714	0.577	0.536	0.542	0.56	0.48	1	0.778	0.536	0.462	0.654	0.741		320.097	866.026	865.442	481.696	539.279	451.576	542.49	504.786	681.611	474.988
Bacteroidetes	Bacteroidetes	Bacteroidales	Prevotellaceae	sf_1	5926	85887	AY244900.1	cow rumen clone BF22	0.92	1	0.84	0.792	0.739	0.739	0.833	0.833	0.833	0.833	0.833	0.833	0.84	0.833	0.792	0.792	0.792	0.792	0.87	0.8	0.875	0.833	0.826	0.833	0.875	0.833	0.833	0.875	0.917	0.917		3960.8	2961.16	3237.23	1860.34	1518.97	1677.93	1930.3	1974.83	1775.05	1947.99
Firmicutes	Clostridia	Clostridiales	Lachnospiraceae	sf_5	2937	52321	AF371541.1	swine intestine clone p-2482-18B5	1	1	1	0.759	0.755	0.808	0.983	0.898	0.839	0.951	0.951	0.984	0.818	0.796	0.727	0.772	0.786	0.786	1	0.95	0.967	0.821	0.709	0.807	0.984	0.984	0.881	0.934	1	1		3711.83	3163.29	2939.05	1797.81	1833.55	1892.8	1949.35	1828.9	1848.3	1838.31
Firmicutes	Clostridia	Clostridiales	Unclassified	sf_17	2912	NA			1	1	0.95	0.667	0.722	0.722	0.684	0.684	0.812	0.65	0.65	0.684	0.667	0.632	0.706	0.632	0.632	0.632	0.684	0.765	0.684	0.632	0.579	0.684	0.722	0.684	0.579	0.65	0.684	0.65		1418.34	1401.54	966.35	601.876	604.442	927.734	406.115	369.672	669.104	424.226
Firmicutes	Bacilli	Lactobacillales	Aerococcaceae	sf_1	3782	NA			0.75	0.941	0.643	0.833	0.692	0.769	0.786	0.846	0.692	0.667	0.714	0.75	0.769	0.75	0.667	0.714	0.769	0.714	0.765	0.714	0.733	0.643	0.692	0.667	0.812	0.692	0.714	0.714	0.769	0.714		738.271	1357.48	947.259	320.479	364.013	626.38	518.424	519.919	567.265	668.971
Bacteroidetes	Flavobacteria	Flavobacteriales	Unclassified	sf_3	6258	42542	AY028207.1	exposed to diatom detritus isolate str. BBFL7 BBFL7	0.5	0.692	0.636	0.818	0.818	0.909	0.769	0.769	0.846	0.75	0.692	0.846	0.833	0.909	0.923	0.692	0.769	0.692	0.615	0.692	0.615	0.846	0.75	0.769	0.846	0.833	0.583	0.583	0.75	0.636		309.32	371.701	447.266	827.58	623.541	761.124	291.801	268.066	668.211	201.235
Firmicutes	Clostridia	Clostridiales	Lachnospiraceae	sf_5	3036	77653	AB088990.1	termite gut homogenate clone Rs-F27 bacterium	1	1	1	1	0.933	1	1	0.938	1	0.938	1	1	1	0.867	0.938	0.938	1	0.875	1	1	1	0.875	0.867	1	1	0.938	0.938	0.938	0.938	0.938		3793.75	3222.69	2750.87	1536.93	1408.87	1866.39	2001.5	1665.68	2121.66	1890.89
Firmicutes	Clostridia	Clostridiales	Unclassified	sf_17	2659	NA			0.944	0.944	0.737	0.737	0.632	0.684	0.737	0.75	0.842	0.842	0.789	0.842	0.944	0.737	0.722	0.722	0.737	0.706	0.789	0.737	0.778	0.667	0.556	0.684	0.895	0.833	0.737	0.842	0.895	0.842		2028.36	1814.44	1194.53	990.751	861.723	925.002	1006.76	938.231	1049.66	1025.21
Firmicutes	Clostridia	Clostridiales	Lachnospiraceae	sf_5	4315	78171	AB089040.1	termite gut homogenate clone Rs-N94 bacterium	1	1	1	0.962	0.923	0.923	0.923	0.923	0.962	1	1	1	1	1	0.923	1	0.96	0.96	0.923	0.923	0.962	0.96	0.96	0.96	0.962	1	1	0.962	0.962	1		3699.98	3303.16	3115.41	1420.66	1265.06	1500.4	1804.96	1739.19	1599.95	2356.81
Firmicutes	Bacilli	Lactobacillales	Enterococcaceae	sf_1	3346	37654	AF395325.1	isopod gut clone RKPsBA	0.583	0.917	0.4	0.5	0.375	0.714	0.5	0.6	0.5	0.545	0.5	0.5	0.333	0.25	0.333	0.455	0.111	0.091	0.667	0.3	0.667	0.3	0.125	0.2	0.7	0.556	0.2	0.75	0.75	0.6		63.5883	526.896	351.813	55.6931	48.3104	142.028	45.1239	51.8838	74.1464	86.1142
Firmicutes	Clostridia	Clostridiales	Clostridiaceae	sf_12	4550	45365	AF371790.1	swine intestine clone p-320-a3	1	0.929	1	0.929	0.929	0.929	0.929	0.929	0.929	1	1	1	0.929	0.929	0.929	0.929	0.929	0.929	1	0.929	1	1	0.929	1	0.929	1	1	1	0.929	1		3524.3	3057.92	2773.6	1667.86	1785.24	1955.62	1901.22	1916.46	1798.27	1984.25
Firmicutes	Clostridia	Clostridiales	Clostridiaceae	sf_12	4582	44399	AF371783.1	swine intestine clone p-2600-9F5	1	0.917	1	0.917	0.917	0.917	0.917	0.917	0.917	1	1	1	0.917	0.917	0.917	0.917	0.917	0.917	1	0.917	1	1	0.917	1	0.917	1	1	1	0.917	1		3208.52	2764.77	2530.87	1495.9	1620.08	1722.54	1806.96	1720.81	1649.09	1848.28
Proteobacteria	Gammaproteobacteria	Enterobacteriales	Enterobacteriaceae	sf_1	8326	NA			0.733	0.688	0.643	0.5	0.273	0.364	0.75	0.733	0.667	0.8	0.8	0.75	0.786	0.714	0.733	0.714	0.786	0.733	0.733	0.688	0.688	0.917	0.667	0.688	0.688	0.867	0.75	0.857	0.933	0.933		2772.02	1529.92	425.448	61.5555	41.5694	71.014	366.005	524.242	276.932	602.799
Firmicutes	Bacilli	Lactobacillales	Streptococcaceae	sf_1	3560	63461	AJ307888.1	Streptococcus gallinaceus str. CCUG 42692	1	0.8	0.857	0.6	0.75	0.556	0.917	0.75	1	0.923	0.923	0.846	0.667	0.75	0.667	0.917	0.8	0.6	0.923	1	0.923	0.6	0.6	0.818	0.923	0.917	0.923	0.923	1	0.846		1500.25	2043.4	1768.16	253.062	475.24	464.322	399.096	432.365	527.958	652.655
Bacteroidetes	Flavobacteria	Flavobacteriales	Flavobacteriaceae	sf_1	5797	NA			0.692	1	1	0.625	0.667	0.688	0.667	0.765	0.688	0.667	0.667	0.778	0.714	0.643	0.6	0.733	0.667	0.562	0.944	0.889	0.778	0.533	0.571	0.643	0.833	0.722	0.5	0.765	0.824	0.765		500.085	1286.59	1416.34	773.841	852.735	896.779	500.374	543.699	855.81	454.139
Bacteroidetes	Bacteroidetes	Bacteroidales	Prevotellaceae	sf_1	6066	83456	AY207061.1	human mouth isolate str. P4P_62	0.87	0.826	0.739	0.842	0.737	0.737	0.81	0.81	0.81	0.8	0.762	0.81	0.905	0.762	0.8	0.714	0.714	0.682	0.762	0.8	0.762	0.762	0.714	0.696	0.818	0.75	0.696	0.81	0.818	0.81		3624.54	2335.59	2840.87	1379.63	1409.99	1429.38	1567.3	1638.66	1458.81	1665.18
Bacteroidetes	Sphingobacteria	Sphingobacteriales	Flexibacteraceae	sf_19	5978	NA			0.636	0.545	0.4	0.769	0.692	0.636	0.5	0.5	0.786	0.615	0.462	0.615	0.857	0.857	0.786	0.5	0.538	0.538	0.5	0.455	0.455	0.615	0.25	0.615	1	0.692	0.538	0.538	0.769	0.75		439.73	341.046	300.905	218.864	151.672	269.489	188.518	212.94	517.238	255.623
Firmicutes	Clostridia	Clostridiales	Lachnospiraceae	sf_5	4330	84779	AY244949.1	cow rumen clone BE33	0.958	0.917	0.8	0.909	0.826	0.818	0.833	0.833	0.833	0.833	0.833	0.957	0.87	0.826	0.826	0.792	0.826	0.833	0.875	0.833	0.833	0.833	0.87	0.833	0.875	0.87	0.833	0.875	0.913	0.833		3346.47	2839.49	2637.23	1643.43	1511.1	1720.72	1837.04	1670.01	1651.77	1948.9
Proteobacteria	Alphaproteobacteria	Consistiales	Unclassified	sf_5	7203	24388	AF353212.1	marine clone Arctic96AD-8	1	0.692	0.5	0.857	0.857	0.929	0.583	0.583	0.667	0.667	0.75	0.75	0.462	0.545	0.417	0.667	0.455	0.538	0.385	0.308	0.25	0.5	0.273	0.308	0.769	0.769	0.385	0.615	0.692	0.692		240.342	158.069	159.089	411.347	390.977	467.964	93.2561	94.0393	130.426	118.747
Proteobacteria	Deltaproteobacteria	Desulfovibrionales	Desulfovibrionaceae	sf_1	9980	51535	AF192152.1	Desulfovibrio piger str. ATCC29098	0.75	0.941	0.562	0.214	0.143	0.267	0.438	0.375	0.25	0.529	0.529	0.529	0.267	0.143	0.167	0.125	0.154	0.067	0.765	0.333	0.188	0.176	0.083	0.125	1	0.706	0.235	0.647	0.812	0.706		165.976	320.928	160.907	34.1975	19.0995	64.6409	43.1184	52.9647	38.4132	89.74
Actinobacteria	Actinobacteria	Actinomycetales	Mycobacteriaceae	sf_1	1681	84725	AY227356.1	Mycobacterium sp. str. 1B(CD)	0.833	0.941	0.933	0.867	0.8	0.867	0.875	0.938	0.933	0.938	1	0.938	0.867	0.8	0.733	0.875	1	0.938	0.941	0.933	1	0.938	0.867	0.938	0.882	1	0.812	0.938	1	1		1937.83	821.958	581.81	821.717	756.114	1235.46	802.203	932.827	1445.41	963.572
Firmicutes	Clostridia	Clostridiales	Lachnospiraceae	sf_5	4434	77987	AB089036.1	termite gut homogenate clone Rs-K11 bacterium	1	1	0.895	0.938	0.875	0.875	1	0.944	1	1	1	0.944	0.941	0.938	0.778	0.941	1	0.889	0.895	0.944	0.895	1	0.944	0.944	0.944	1	0.944	0.944	0.889	1		3484.43	3126.89	2459.06	1483.19	1399.88	1537.73	1941.33	1914.29	1499.9	2259.82
Proteobacteria	Gammaproteobacteria	Pasteurellales	Pasteurellaceae	sf_1	8555	109908	AY613451.1	Haemophilus influenzae str. M9741	0.875	0.857	0.938	0.786	0.857	0.857	0.733	0.733	0.8	0.733	0.733	0.786	0.786	0.714	0.857	0.714	0.733	0.643	0.75	0.8	0.75	0.714	0.867	0.688	0.75	0.867	0.75	0.733	0.733	0.8		3189.12	1781.87	1299.98	957.53	904.416	1012.4	1021.81	1218.19	1277.46	1299.87
Proteobacteria	Gammaproteobacteria	Unclassified	Unclassified	sf_3	8560	NA			0.667	0.667	0.9	0.727	0.75	0.917	0.5	0.692	0.818	0.833	0.769	0.643	0.75	0.636	0.308	0.667	0.583	0.308	0.25	0.75	0.385	0.667	0.583	0.462	0.769	1	0.385	0.667	0.75	0.571		98.0769	114.001	484.538	101.615	138.19	326.846	52.1432	107.01	254.599	97.8982
Firmicutes	Clostridia	Clostridiales	Lachnospiraceae	sf_5	4539	78294	AB089046.1	termite gut homogenate clone Rs-C61 bacterium	1	1	1	0.818	0.818	0.818	1	1	1	1	1	1	0.917	0.833	0.833	0.917	1	1	1	1	1	1	1	1	1	1	1	1	1	1		2843.15	2613.41	2518.15	1207.66	1119	1258.22	1338.68	1437.61	1325.7	1719.56
Firmicutes	Bacilli	Lactobacillales	Enterococcaceae	sf_1	3392	15276	Y17152.2	Vagococcus lutrae str. m1134/97/1; CCUG 39187	1	0.923	1	0.636	0.545	0.818	0.667	0.727	0.818	0.917	0.917	0.667	0.833	0.545	0.727	0.917	0.778	0.545	1	0.917	1	0.7	0.636	0.583	1	0.909	0.667	0.917	0.846	0.923		1279.31	1260.72	1089.08	426.003	416.818	647.32	314.865	372.915	512.772	513.059
Proteobacteria	Gammaproteobacteria	Enterobacteriales	Enterobacteriaceae	sf_1	9600	10203	U91515.1	Candidatus Phlomobacter fragariae str. france fragariae	0.824	0.875	0.8	0.6	0.571	0.769	0.706	0.706	0.625	0.8	0.824	0.667	0.688	0.667	0.667	0.786	0.714	0.714	0.944	0.733	0.667	0.786	0.643	0.667	0.737	0.824	0.647	0.765	0.933	0.867		1218.96	691.671	480.902	358.585	268.516	413.338	539.481	479.925	406.465	646.309
Firmicutes	Clostridia	Clostridiales	Clostridiaceae	sf_12	4266	78067	AB088951.1	termite gut homogenate clone Rs-M86 bacterium	1	0.962	0.962	1	0.958	0.958	1	1	1	1	0.962	1	0.96	0.96	0.96	1	1	1	1	1	1	1	1	1	1	1	1	0.962	0.962	0.962		3882.12	3323.28	2931.78	1551.59	1563.91	1843.63	1975.42	2071.03	1869.74	2292.45
Firmicutes	Bacilli	Lactobacillales	Streptococcaceae	sf_1	3287	47073	AF432137.1	tongue dorsum scrapings clone FP015	1	0.938	1	0.692	0.704	0.731	0.724	0.793	0.821	0.903	0.903	0.806	0.897	0.654	0.828	0.933	0.667	0.655	0.969	0.767	0.969	0.643	0.731	0.679	0.938	0.862	0.667	0.903	0.906	0.906		1903.34	2948.7	2719.96	1794.88	1742.55	1726.19	1531.2	1417.08	1449.87	1526.49
Firmicutes	Clostridia	Clostridiales	Lachnospiraceae	sf_5	2943	62513	AF527773.1	human thigh wound isolate str. MDA2477	0.88	0.917	0.87	0.7	0.7	0.737	0.762	0.8	0.75	0.773	0.81	0.773	0.75	0.737	0.7	0.75	0.75	0.7	0.833	0.762	0.727	0.75	0.6	0.75	0.826	0.857	0.8	0.81	0.857	0.857		2894.89	2360.5	1978.15	1387.44	1443.7	1455.79	1757.83	1684.06	1596.38	1387.8
Bacteroidetes	Bacteroidetes	Bacteroidales	Prevotellaceae	sf_1	5437	86520	AY244919.1	cow rumen clone BE1	0.96	0.923	0.923	0.875	0.864	0.75	0.92	0.958	0.875	0.923	0.962	0.962	0.958	0.8	0.826	0.833	0.875	0.87	0.885	0.96	0.885	0.875	0.833	0.875	1	1	0.92	0.96	0.96	0.96		4096.6	2660.35	3297.22	2510.1	2254.86	1877.32	2147.9	2312.07	2018.03	2079.43
Firmicutes	Clostridia	Clostridiales	Clostridiaceae	sf_12	4627	78007	AB089030.1	termite gut homogenate clone Rs-A13 bacterium	1	1	1	0.952	0.952	1	0.955	0.955	0.955	1	1	1	0.955	0.955	0.955	0.955	0.955	0.955	1	1	0.955	0.955	0.955	0.955	1	0.955	0.955	1	1	1		3559.87	3037.8	2658.14	1586.76	1506.61	1989.3	2092.75	1865.65	2045.73	1962.5
Firmicutes	Clostridia	Clostridiales	Clostridiaceae	sf_12	3012	102944	AY438672.1	Clostridium bartlettii str. WAL 16138	0.846	1	0.917	0.583	0.545	0.5	0.538	0.538	0.583	0.692	0.769	0.615	0.583	0.5	0.538	0.636	0.636	0.583	0.462	0.769	0.692	0.545	0.5	0.615	0.615	0.583	0.462	0.5	0.538	0.538		218.787	1027.93	581.81	267.718	251.664	346.876	193.531	259.419	332.319	254.717
Firmicutes	Clostridia	Clostridiales	Lachnospiraceae	sf_5	4533	77897	AB088980.1	termite gut homogenate clone Rs-N06 bacterium	1	1	1	0.947	0.85	0.842	0.9	0.9	0.9	0.95	0.95	0.95	0.947	0.944	0.85	0.944	0.895	0.85	0.9	0.9	0.95	0.9	0.9	0.9	1	1	0.95	0.95	0.95	1		4002.83	3651.87	3663.58	1767.52	1435.83	1661.54	2117.82	2079.67	1725.91	2626.03
Actinobacteria	Actinobacteria	Actinomycetales	Actinomycetaceae	sf_1	1672	45427	AJ234041.1	Actinomyces odontolyticus str. CCUG 28084	0.833	0.909	0.833	0.8	1	1	0.714	0.667	1	0.6	0.5	0.714	0.625	0.714	0.625	0.857	0.8	0.8	0.556	0.5	0.667	0.333	0.8	0.6	0.8	0.667	0.429	0.625	0.857	0.625		191.843	319.012	643.627	235.474	361.766	513.486	87.2396	123.224	610.145	221.177
Bacteroidetes	Bacteroidetes	Bacteroidales	Prevotellaceae	sf_1	5484	71907	AY134905.1	oral periodontitis clone FX046	1	1	1	0.955	0.909	0.909	1	0.917	1	1	0.958	1	0.958	0.875	0.87	0.875	0.917	0.87	0.958	0.917	0.917	0.917	0.913	0.917	1	0.958	0.917	1	1	1		4631.17	3354.89	3991.76	2824.71	2643.59	2499.15	2444.71	2408.27	2151.14	2302.42
Bacteroidetes	Bacteroidetes	Bacteroidales	Bacteroidaceae	sf_12	5621	82138	AY217430.1	TCE-dechlorinating microbial community clone 3G	1	1	1	0.706	0.733	0.733	1	1	0.95	1	1	1	0.9	0.667	0.722	0.65	0.8	0.684	1	1	1	1	0.895	1	1	0.95	1	1	1	1		3554.48	2420.85	3645.4	701.537	894.305	997.837	1274.5	1297.09	864.744	1447.62
Firmicutes	Clostridia	Clostridiales	Lachnospiraceae	sf_5	4538	31395	AJ270470.2	Faecalibacterium prausnitzii str. L2-6	0.975	0.975	0.975	0.848	0.818	0.788	0.882	0.824	0.818	0.882	0.882	0.879	0.824	0.903	0.743	0.765	0.824	0.794	0.816	0.771	0.73	0.853	0.794	0.765	0.939	0.875	0.8	0.882	0.939	0.909		3874.58	3124.02	2685.42	2181.8	2276.21	2173.21	2012.53	2131.56	2035.9	2015.98
Firmicutes	Bacilli	Bacillales	Paenibacillaceae	sf_1	3567	14390	Y16128.1	Paenibacillus sp. str. T-168	0.786	0.733	0.786	0.909	1	0.846	0.643	0.733	0.769	0.714	0.733	0.929	0.857	0.692	0.846	0.667	1	0.692	0.8	0.75	0.688	0.692	0.818	0.846	0.929	0.929	0.786	0.867	0.8	0.867		730.727	1282.75	1579.07	889.135	904.416	942.301	526.446	569.64	844.197	693.446
Firmicutes	Clostridia	Clostridiales	Clostridiaceae	sf_12	4197	34959	AJ237756.2	Clostridium acidisoli str. CK74	0.667	0.692	0.769	0.615	0.75	0.917	0.692	0.714	0.769	0.786	0.846	0.714	0.692	0.5	0.692	0.692	0.692	0.5	0.643	0.786	0.643	0.769	0.583	0.692	0.643	0.917	0.571	0.846	0.846	0.786		507.629	460.795	384.54	263.809	219.082	489.814	208.573	174.027	298.372	232.055
Firmicutes	Clostridia	Clostridiales	Unclassified	sf_17	3099	NA			1	0.857	0.615	0.583	0.545	0.545	0.727	0.667	0.545	0.667	0.727	0.727	0.583	0.583	0.583	0.727	0.727	0.667	0.667	0.727	0.583	0.727	0.455	0.727	0.667	0.727	0.583	0.667	0.727	0.667		1061.6	786.513	1015.44	481.696	358.396	591.783	606.666	444.255	616.398	564.728
Firmicutes	Clostridia	Clostridiales	Lachnospiraceae	sf_5	3033	28879	AJ408968.1	human colonic clone HuCA15	1	1	1	0.75	0.667	0.8	1	0.889	0.889	0.889	0.889	0.889	0.889	0.778	0.875	0.875	1	0.875	0.889	0.889	0.8	0.889	0.778	0.889	0.889	0.889	1	0.889	1	0.8		2966.02	2614.36	2379.97	1180.3	614.553	913.167	1564.3	1453.83	1331.96	1599.91
Proteobacteria	Betaproteobacteria	Burkholderiales	Comamonadaceae	sf_1	8020	74685	AJ400840.1	Acidovorax wohlfahrtii str. B2/74	0.625	0.833	0.818	0.5	0.455	0.6	0.636	0.75	0.727	0.818	0.909	0.833	0.636	0.727	0.636	1	0.818	0.818	0.727	0.833	0.727	0.667	0.667	0.636	0.727	0.833	0.636	0.667	0.9	0.636		156.276	465.585	465.448	106.501	124.708	181.177	132.363	158.894	260.852	203.955
Proteobacteria	Alphaproteobacteria	Consistiales	Unclassified	sf_5	7210	5902	U75256.1	marine planktonic clone SAR211	0.375	0.4	0.375	0.909	0.818	0.818	0.4	0.455	0.6	0.4	0.4	0.364	0.273	0.333	0.4	0.4	0.3	0.5	0.364	0.222	0.364	0.364	0.4	0.4	0.364	0.4	0.273	0.3	0.444	0.4		135.799	84.3034	93.635	604.807	489.845	849.436	102.281	85.392	179.559	90.6465
Cyanobacteria	Cyanobacteria	Chloroplasts	Chloroplasts	sf_5	5166	NA			0.9	0.909	0.818	1	1	1	0.818	0.909	1	0.909	0.909	0.909	0.818	0.818	0.818	1	1	1	0.818	0.727	0.818	1	0.909	1	1	0.909	0.818	0.818	0.909	0.818		1738.44	918.716	561.81	1160.76	1006.65	1655.17	760.087	605.311	963.903	739.675
Firmicutes	Bacilli	Lactobacillales	Streptococcaceae	sf_1	3446	78372	AY173079.1	Streptococcus bovis str. HJ50	1	1	1	0.722	0.684	0.722	0.75	0.75	0.75	0.952	0.905	0.81	1	0.684	0.905	1	0.684	0.7	1	0.7	1	0.65	0.765	0.684	0.952	0.8	0.65	0.952	0.952	0.952		1956.15	3288.79	3055.41	2032.31	1948.15	1889.15	1985.45	1726.22	1638.37	1862.79
Proteobacteria	Deltaproteobacteria	Desulfobacterales	Desulfobulbaceae	sf_1	9891	10788	AJ012591.1	related to Desulfobulbus	0.75	0.714	0.5	0	0	0	0.583	0.5	0.5	0.769	0.846	0.769	0.182	0	0.625	0.429	0.714	0.5	0.364	0.3	0.125	0.556	0.222	0.5	0.929	0.636	0.333	0.583	0.929	0.75		341.653	75.6815	115.453	21.4956	16.8525	31.8652	66.1817	64.8547	69.6798	131.437
Firmicutes	Clostridia	Clostridiales	Clostridiaceae	sf_12	4211	81682	AY208919.1	Clostridium fallax VA24831_02	0.762	0.952	0.619	0.684	0.588	0.632	0.65	0.65	0.65	0.714	0.7	0.762	0.737	0.556	0.65	0.65	0.632	0.65	0.667	0.762	0.619	0.65	0.722	0.7	0.905	0.7	0.6	0.667	0.762	0.762		1207.1	1335.44	918.169	607.739	606.689	742.005	387.063	423.717	526.171	544.785
Firmicutes	Clostridia	Clostridiales	Unclassified	sf_17	2824	NA			0.92	0.875	0.583	0.458	0.455	0.5	0.522	0.565	0.476	0.565	0.542	0.625	0.458	0.435	0.435	0.478	0.458	0.435	0.577	0.56	0.52	0.478	0.48	0.458	0.783	0.667	0.542	0.542	0.769	0.808		684.383	588.208	840.897	505.146	665.111	620.006	262.721	325.354	527.065	388.873
Firmicutes	Clostridia	Clostridiales	Clostridiaceae	sf_12	4278	77360	AF482434.1	granular sludge clone R1p16	1	1	0.923	1	0.917	0.917	1	0.923	1	1	0.923	1	1	1	0.917	1	1	1	1	1	1	0.923	1	1	1	1	1	0.923	0.923	0.923		3474.73	2781.05	2366.33	1068.92	996.543	1768.98	1391.82	1560.84	1443.62	2099.37
Bacteroidetes	Bacteroidetes	Bacteroidales	Porphyromonadaceae	sf_1	6117	NA			0.667	0.6	0.591	0.682	0.737	0.667	0.792	0.833	0.636	0.833	0.87	0.913	0.682	0.667	0.591	0.545	0.545	0.571	0.826	0.792	0.609	0.636	0.591	0.565	0.826	0.739	0.522	0.609	0.87	0.636		1362.3	785.555	1154.53	1357.15	1333.59	996.927	1001.75	903.642	1040.73	883.803
Proteobacteria	Betaproteobacteria	Rhodocyclales	Rhodocyclaceae	sf_1	7670	6717	AF016690.1	Propionivibrio pelophilus str. asp 66	0.385	0.9	1	0.643	0.643	0.625	0.812	0.722	0.706	0.824	0.7	0.778	0.667	0.571	0.6	0.867	0.867	0.625	0.75	0.824	0.765	0.8	0.688	0.75	0.75	0.722	0.778	0.778	0.737	0.778		209.087	972.363	1499.98	149.492	107.856	254.011	457.256	626.929	452.918	718.827
Bacteroidetes	Sphingobacteria	Sphingobacteriales	Crenotrichaceae	sf_11	5872	NA			0.4	0.455	0.4	0.417	0.455	0.455	0.833	0.833	0.583	1	1	0.923	0.5	0.333	0.545	0.545	0.636	0.545	0.455	0.455	0.417	0.667	0.5	0.5	1	0.75	0.583	0.833	1	1		1007.71	599.704	547.265	223.749	192.118	333.219	405.112	472.358	513.665	565.634
Firmicutes	Bacilli	Lactobacillales	Aerococcaceae	sf_1	3435	36593	AF275700.1	cf. Alkalibacterium sp. isolate str. F1	0.857	0.867	0.769	0.5	0.364	0.455	0.5	0.5	0.636	0.615	0.615	0.643	0.455	0.5	0.357	0.75	0.333	0.273	0.75	0.538	0.786	0.308	0.364	0.308	0.929	0.636	0.333	0.538	0.917	0.692		530.262	584.376	468.175	222.772	124.708	306.817	169.465	186.998	308.199	310.917
Firmicutes	Clostridia	Clostridiales	Unclassified	sf_17	2875	NA			0.938	0.875	0.938	0.6	0.545	0.583	0.769	0.643	0.692	0.643	0.643	0.714	0.538	0.5	0.615	0.615	0.615	0.692	0.692	0.75	0.643	0.462	0.5	0.571	0.692	0.692	0.615	0.5	0.571	0.571		1068.07	1251.14	660.9	133.859	121.338	263.116	321.884	435.607	485.078	470.455
Bacteroidetes	Bacteroidetes	Bacteroidales	Prevotellaceae	sf_1	5916	83344	AY244931.1	cow rumen clone BE14	0.933	0.933	0.933	0.929	0.786	0.857	0.929	0.929	0.929	0.929	0.929	0.867	0.933	0.867	0.857	0.929	0.929	0.929	0.933	0.929	0.929	0.929	0.929	0.929	0.933	0.929	0.929	0.929	0.929	0.929		4454.42	3131.68	3672.67	2481.76	2336.88	2245.13	2459.75	2494.74	2135.95	2501.84
Firmicutes	Clostridia	Clostridiales	Lachnospiraceae	sf_5	3059	14050	X89978.1	Butyrivibrio fibrisolvens str. NCDO 2249	1	1	1	0.915	0.894	0.894	0.979	0.958	0.917	0.98	0.96	0.98	0.875	0.915	0.894	0.894	0.915	0.915	1	0.959	0.98	0.957	0.891	0.938	1	0.98	0.938	0.96	1	1		3854.1	3101.02	3121.77	2216.98	2186.33	2307.04	2392.57	2293.69	2224.39	2304.23
Firmicutes	Clostridia	Clostridiales	Lachnospiraceae	sf_5	4567	21362	AJ408989.1	human colonic clone HuCB5	1	1	1	1	0.923	0.923	1	1	1	1	1	1	1	1	0.962	1	1	1	1	1	1	1	1	1	1	1	1	1	1	1		4377.9	3728.51	3575.4	2036.22	1868.38	2268.8	2425.66	2594.19	2302.11	2822.73
Firmicutes	Clostridia	Clostridiales	Lachnospiraceae	sf_5	3088	13957	X73449.1	Clostridium sphenoides str. DSM 632	1	0.984	0.968	0.804	0.768	0.821	0.932	0.915	0.845	0.934	0.918	0.934	0.81	0.836	0.789	0.828	0.845	0.821	0.984	0.915	0.933	0.862	0.804	0.862	0.951	0.918	0.915	0.918	0.967	0.967		3098.58	2697.71	2592.69	1530.09	1461.67	1677.93	1810.97	1821.34	1746.46	1846.47
Bacteroidetes	Sphingobacteria	Sphingobacteriales	Crenotrichaceae	sf_11	5845	NA			0.9	0.818	0.8	0.818	0.727	0.818	0.818	0.727	0.818	0.818	0.909	1	0.818	0.545	0.727	0.636	0.455	0.545	0.727	0.727	0.636	0.636	0.364	0.455	0.909	0.909	0.364	0.909	0.909	0.818		452.663	297.936	364.54	419.164	357.272	653.693	277.763	303.736	548.505	272.846
Firmicutes	Clostridia	Clostridiales	Clostridiaceae	sf_12	4321	78187	AB089045.1	termite gut homogenate clone Rs-C76 bacterium	1	0.96	0.96	1	0.957	0.957	1	1	1	1	0.96	1	0.958	0.958	0.958	1	1	1	1	1	1	1	1	1	1	1	1	0.96	0.96	0.96		3858.41	3416.2	3096.32	1814.42	1760.52	2115.85	2123.83	2278.56	2027.86	2457.43
Firmicutes	Clostridia	Clostridiales	Lachnospiraceae	sf_5	2844	19835	AF202260.1	Pseudobutyrivibrio ruminis str. pC-XS2	1	1	1	0.915	0.915	0.915	0.979	0.958	0.917	0.98	0.96	0.98	0.896	0.896	0.894	0.894	0.936	0.915	1	0.959	0.98	0.957	0.891	0.938	1	0.98	0.938	0.96	1	1		3923.08	3185.33	3174.5	2354.74	2409.9	2338	2485.83	2336.93	2236.01	2270.69
Firmicutes	Bacilli	Lactobacillales	Aerococcaceae	sf_1	3323	15254	Y17301.1	Trichococcus flocculiformis str. DSM 2094	0.767	0.97	0.939	0.643	0.654	0.731	0.839	0.806	0.71	0.969	0.969	0.839	0.688	0.607	0.594	1	0.677	0.594	1	0.938	1	0.6	0.654	0.645	0.9	0.938	0.633	0.909	0.97	0.97		1567.08	2259.91	1557.25	611.647	541.526	708.319	690.897	722.049	610.145	1030.65
Firmicutes	Clostridia	Clostridiales	Lachnospiraceae	sf_5	4571	16080	X85022.1	Faecalibacterium prausnitzii str. ATCC 27766	1	1	1	1	0.889	0.889	1	1	1	1	1	1	1	1	0.944	1	1	1	1	1	1	1	1	1	1	1	1	1	1	1		4298.14	3702.64	3521.77	1973.68	1854.9	2259.7	2307.34	2416.92	2132.38	2603.37
Firmicutes	Bacilli	Lactobacillales	Unclassified	sf_1	3481	NA			0.968	0.969	0.952	0.462	0.489	0.596	0.738	0.71	0.793	0.905	0.873	0.812	0.852	0.571	0.825	0.934	0.604	0.644	1	0.717	0.953	0.509	0.553	0.638	0.969	0.79	0.61	0.937	0.968	0.984		1634.97	1937.06	1741.79	1233.06	1439.2	1123.48	1055.9	939.312	971.05	890.149
Proteobacteria	Gammaproteobacteria	Alteromonadales	Alteromonadaceae	sf_1	9442	91523	AY135666.1	Southern Ocean clone ANT18/2_88	0.857	0.818	0.9	1	0.833	0.833	0.636	0.818	0.9	0.727	0.818	0.636	1	0.833	0.444	0.75	0.636	0.222	0.6	0.778	0.444	0.7	0.636	0.3	0.833	0.667	0.5	0.833	1	0.833		984.003	143.699	361.813	334.158	269.64	493.456	113.311	148.085	266.212	164.977
Firmicutes	Bacilli	Bacillales	Paenibacillaceae	sf_1	3595	84807	AY257871.1	Paenibacillus sp. str. MB 2039	0.9	0.909	0.8	0.778	0.667	0.8	0.909	1	0.818	1	1	1	0.8	0.778	0.909	0.909	0.818	0.818	1	0.909	1	0.818	0.7	0.818	1	1	0.909	1	1	0.909		1798.8	1733.97	1873.61	771.887	508.945	839.421	741.035	1009.57	1129.17	1166.62
Proteobacteria	Unclassified	Unclassified	Unclassified	sf_20	6763	NA			0.95	0.9	0.895	0.9	0.9	0.95	0.944	0.8	0.85	0.85	0.85	1	0.9	0.889	0.947	1	0.895	0.947	1	1	0.9	0.889	0.611	0.947	0.947	0.895	0.947	0.895	0.895	0.842		1598.33	751.067	838.17	720.102	943.738	965.972	518.424	429.122	602.998	629.993
Firmicutes	Clostridia	Clostridiales	Unclassified	sf_17	3030	NA			0.917	0.846	0.88	0.755	0.771	0.787	0.854	0.833	0.792	0.827	0.84	0.827	0.776	0.848	0.745	0.787	0.809	0.787	0.898	0.872	0.875	0.83	0.8	0.796	0.88	0.878	0.796	0.875	0.917	0.88		3410.06	2554.01	2690.87	1780.22	1840.29	1942.87	2097.76	2021.3	1987.66	1947.99
Firmicutes	Clostridia	Clostridiales	Lachnospiraceae	sf_5	2825	14049	AF105403.1	Butyrivibrio fibrisolvens str. LP1265	1	1	1	0.927	0.909	0.891	0.982	0.964	0.929	0.983	0.966	0.983	0.893	0.891	0.909	0.891	0.909	0.909	1	0.965	0.982	0.964	0.907	0.946	1	0.983	0.946	0.966	1	1		3882.12	3147.01	3134.5	2268.76	2269.47	2252.42	2422.65	2333.69	2198.49	2305.14
Firmicutes	Clostridia	Clostridiales	Clostridiaceae	sf_12	4606	16212	X68183.1	Clostridium aurantibutyricum str. NCIMB10659	0.714	0.867	0.714	0.417	0.333	0.455	0.667	0.714	0.615	0.867	0.8	1	0.538	0.231	0.417	0.733	0.571	0.667	0.867	0.8	0.733	0.786	0.643	0.786	0.933	0.867	0.733	0.8	0.867	0.867		684.383	1484.89	742.717	209.093	122.461	291.339	186.512	289.684	281.399	475.894
Firmicutes	Clostridia	Clostridiales	Lachnospiraceae	sf_5	3066	13963	AF067965.1	Clostridium methoxybenzovorans str. SR3; DSM 12182	1	1	0.959	0.833	0.815	0.848	0.942	0.928	0.868	0.944	0.93	0.931	0.838	0.875	0.821	0.866	0.882	0.851	0.932	0.928	0.943	0.897	0.833	0.884	0.944	0.93	0.913	0.93	0.944	0.972		3376.65	2940.08	2748.14	1851.55	1862.76	1982.93	2027.57	2019.14	2021.61	2052.24
Firmicutes	Bacilli	Lactobacillales	Streptococcaceae	sf_1	3629	55433	AF139600.1	Streptococcus mutans str. UA96	1	1	1	1	0.917	1	0.917	0.917	0.917	1	1	1	0.917	0.75	0.818	0.833	0.75	0.667	1	0.917	1	0.917	0.75	0.75	1	1	1	1	1	1		1775.08	1702.35	1385.43	1065.99	921.268	1243.65	771.118	811.765	918.343	988.953
Firmicutes	Clostridia	Clostridiales	Clostridiaceae	sf_12	4548	78376	AB089029.1	termite gut homogenate clone Rs-Q69 bacterium	1	1	0.958	0.833	0.833	0.917	0.958	0.917	0.958	1	1	0.958	0.958	0.917	0.913	0.913	0.913	0.957	0.958	0.958	0.917	0.913	0.875	0.917	1	1	0.958	1	1	1		3063.02	2429.47	2291.78	1316.12	1263.94	1641.51	1838.05	1751.08	1890.29	1813.84
Firmicutes	Clostridia	Clostridiales	Clostridiaceae	sf_12	4594	44151	AF371804.1	swine intestine clone p-1487-b5	0.923	0.692	0.75	0.333	0.182	0.273	0.385	0.417	0.636	0.692	0.75	0.692	0.417	0.5	0.182	0.4	0.545	0.333	0.571	0.692	0.615	0.5	0.636	0.538	0.846	0.538	0.615	0.692	0.769	0.692		417.096	653.352	534.538	99.6613	111.226	149.311	165.454	243.205	196.533	342.644
Firmicutes	Clostridia	Clostridiales	Lachnospiraceae	sf_5	2834	14059	U41168.1	Butyrivibrio fibrisolvens str. OB156	1	1	1	0.915	0.915	0.915	0.979	0.958	0.917	0.98	0.96	0.98	0.896	0.896	0.894	0.894	0.936	0.915	1	0.959	0.98	0.957	0.891	0.938	1	0.98	0.938	0.96	1	1		3969.42	3169.04	3163.59	2370.38	2425.63	2331.62	2623.2	2465.56	2287.82	2417.54
Firmicutes	Bacilli	Bacillales	Bacillaceae	sf_1	3328	28540	AJ224963.1	Pseudobacillus carolinae	1	0.833	1	0.7	0.727	0.909	0.909	0.909	1	0.909	0.909	1	1	0.909	0.909	0.909	1	0.818	0.917	0.909	0.917	0.818	0.909	1	1	0.909	0.909	0.909	0.909	0.909		1642.52	1650.62	1773.61	378.127	347.161	531.694	739.029	670.165	780.771	912.81
Firmicutes	Clostridia	Clostridiales	Lachnospiraceae	sf_5	3171	82283	AY169414.1	Lachnospira pectinoschiza	1	1	1	0.912	0.895	0.93	0.983	0.983	0.948	0.983	0.983	0.983	0.931	0.945	0.914	0.915	0.949	0.931	0.983	0.983	0.983	0.966	0.948	0.949	0.983	0.966	0.983	0.983	0.983	0.983		3865.96	3369.26	3370.86	1922.88	1909.95	2016.61	2181.99	2166.15	1972.47	2378.56
Firmicutes	Clostridia	Clostridiales	Lachnospiraceae	sf_5	2804	103489	AY353957.1	Clostridium amygdalinum str. BR-10	1	1	1	0.853	0.824	0.868	0.958	0.944	0.886	0.959	0.945	0.959	0.857	0.881	0.841	0.871	0.9	0.87	0.973	0.958	0.958	0.914	0.868	0.901	1	0.945	0.93	0.945	1	1		3490.89	3068.45	2891.78	1861.32	1852.65	2042.11	2095.76	2107.78	2084.14	2112.06
Firmicutes	Clostridia	Clostridiales	Clostridiaceae	sf_12	4632	NA			0.938	0.917	0.957	0.889	0.891	0.933	0.936	0.957	0.911	0.957	0.957	0.979	0.909	0.864	0.889	0.933	0.913	0.891	0.913	0.896	0.956	0.915	0.891	0.936	0.957	0.957	0.915	0.978	0.979	0.978		1892.56	2025.2	1444.52	1028.86	1071.82	1222.71	1584.35	1448.42	1408.78	1359.7
Unclassified	Unclassified	Unclassified	Unclassified	sf_160	2838	NA			0.867	0.714	0.75	0.333	0.5	0.833	0.571	0.429	0.667	0.692	0.615	0.571	0.462	0.333	0.182	0.538	0.692	0.385	0.571	0.5	0.231	0.5	0.692	0.429	0.643	0.75	0.286	0.786	0.786	0.923		231.72	273.986	330.904	61.5555	60.6689	129.282	58.1597	69.1783	116.133	107.869
Firmicutes	Bacilli	Lactobacillales	Lactobacillaceae	sf_1	3521	19307	AJ271383.1	Pediococcus inopinatus str. DSM 20285	0.931	0.933	0.931	0.786	0.786	0.893	0.862	0.862	0.897	0.931	0.966	0.933	0.862	0.793	0.793	0.897	0.821	0.793	0.933	0.862	0.967	0.857	0.724	0.793	1	0.964	0.759	0.931	1	0.897		2463.78	2114.29	1989.97	1618.03	1588.63	1848.18	1643.51	1580.29	1580.3	1700.53
Bacteroidetes	Flavobacteria	Flavobacteriales	Flavobacteriaceae	sf_1	5339	NA			1	0.923	0.917	0.9	0.727	0.9	0.833	0.833	0.909	0.833	0.833	0.917	1	1	0.833	0.9	0.909	0.833	0.833	0.833	0.769	0.833	0.727	0.909	0.846	0.846	0.692	0.818	0.833	0.818		1113.33	1564.4	2029.97	1909.2	1565.03	1766.24	1477.06	1083.07	1592.81	1052.41
Firmicutes	Clostridia	Clostridiales	Lachnospiraceae	sf_5	4623	72987	AJ408957.1	human colonic clone HuCA1	0.973	0.973	0.946	0.941	0.912	0.857	0.971	0.944	0.971	0.944	0.919	0.972	0.943	0.941	0.889	0.917	0.943	0.917	0.972	0.971	0.944	0.971	0.971	0.944	0.972	0.944	0.944	0.944	0.946	0.944		3433.77	3159.46	2877.23	1650.27	1683	1721.63	2086.73	2058.06	1770.58	2260.72
Bacteroidetes	Flavobacteria	Flavobacteriales	Flavobacteriaceae	sf_1	6090	77694	AB074613.1	synonym: CFB group clone APe2_9	0.786	0.944	0.944	0.786	0.786	0.786	0.667	0.722	0.667	0.778	0.778	0.944	0.8	0.786	0.714	0.588	0.588	0.667	0.944	0.889	0.824	0.667	0.786	0.588	0.706	0.882	0.625	0.667	0.667	0.667		2462.7	2621.07	3253.59	3897.54	3767.09	3132.81	2701.42	2146.69	2043.94	2284.29
Proteobacteria	Gammaproteobacteria	Vibrionales	Vibrionaceae	sf_1	9192	NA			0.778	0.889	0.857	0.727	0.545	0.889	0.7	0.7	0.9	0.8	0.9	0.9	0.9	0.6	0.9	0.7	0.667	0.7	1	0.8	0.9	0.778	0.667	0.8	0.9	0.8	0.8	0.8	0.889	0.889		2783.88	2573.17	2126.33	1095.3	816.783	2114.03	1240.41	1213.86	1604.42	1364.23
Firmicutes	Clostridia	Clostridiales	Lachnospiraceae	sf_5	4164	17850	AF376226.1	ckncm322-B3-7 clone	0.812	0.941	0.824	0.875	0.75	0.812	0.867	0.812	0.824	0.938	0.882	0.882	0.765	0.6	0.706	0.75	0.765	0.75	0.765	0.765	0.722	0.75	0.688	0.765	0.882	0.812	0.647	0.941	0.882	0.882		1065.91	1275.09	1009.08	190.529	126.955	328.667	559.537	546.941	455.598	740.582
Bacteroidetes	Bacteroidetes	Bacteroidales	Porphyromonadaceae	sf_1	5460	38278	AJ400267.2	mouse feces clone F8	1	1	1	0.909	0.818	0.909	1	1	1	1	1	1	1	1	0.909	0.909	1	0.909	1	1	1	1	1	1	1	1	1	1	1	1		4469.51	3158.5	3735.4	1511.53	1690.86	2023.9	2169.96	2338.01	2145.78	2184.58
Firmicutes	Bacilli	Lactobacillales	Streptococcaceae	sf_1	3588	80847	AY188350.1	Streptococcus downei str. ATCC 33748	1	1	1	0.909	0.818	1	0.909	0.909	1	1	1	0.909	1	0.818	1	1	1	0.9	1	1	1	1	0.909	0.909	1	1	1	1	1	1		2016.5	2111.42	1839.06	1118.75	1088.67	1529.53	1131.11	1130.63	1283.72	1290.81
Firmicutes	Mollicutes	Acholeplasmatales	Acholeplasmataceae	sf_1	3945	111397	AY566302.1	Ash witches'-broom phytoplasma str. AshWB	0.806	0.812	0.667	0.613	0.645	0.724	0.71	0.71	0.621	0.871	0.833	0.862	0.767	0.71	0.643	0.677	0.69	0.656	0.719	0.767	0.727	0.677	0.567	0.742	0.879	0.833	0.758	0.879	0.903	0.935		1795.56	1744.51	1653.61	1048.4	984.184	1234.55	1161.19	1141.44	1113.09	1343.38
Firmicutes	Clostridia	Clostridiales	Clostridiaceae	sf_12	2782	38044	AJ408996.1	human colonic clone HuCB21	1	0.963	0.769	0.652	0.714	0.762	0.818	0.818	0.81	0.818	0.818	0.864	0.81	0.8	0.773	0.727	0.727	0.727	0.75	0.783	0.75	0.727	0.682	0.696	0.76	0.864	0.708	0.773	0.818	0.864		2780.64	2139.2	2364.51	1234.04	1326.85	1505.86	1592.37	1657.04	1532.95	1891.79
Spirochaetes	Spirochaetes	Spirochaetales	Spirochaetaceae	sf_1	6513	63216	AF524010.1	forested wetland clone FW20	0.778	0.7	0.8	0.8	0.889	0.889	0.636	0.778	0.778	0.636	0.727	0.636	0.8	0.889	0.7	0.778	0.7	0.7	0.7	0.8	0.778	0.778	0.7	0.7	1	0.727	0.636	0.7	0.818	0.7		1777.24	1459.02	2032.7	586.243	683.087	1150.79	813.233	1331.68	1318.56	1185.66
Firmicutes	Clostridia	Clostridiales	Lachnospiraceae	sf_5	4511	73575	AF376218.1	ckncm314-B7-17 clone	1	1	1	1	1	1	1	1	1	1	1	1	1	1	1	1	1	1	1	1	1	1	1	1	1	1	1	1	1	1		4196.83	3656.66	3493.59	2383.08	2350.36	2741.32	2467.78	2607.16	2440.58	2911.57
Bacteroidetes	Flavobacteria	Flavobacteriales	Flavobacteriaceae	sf_1	5548	2452	AF001368.1	marine psychrophile str. SW17	0.417	0.5	0.769	0.6	0.6	0.846	0.571	0.467	0.929	0.538	0.615	0.583	0.857	0.929	0.615	0.5	0.643	0.429	0.583	0.538	0.643	0.571	0.429	0.467	0.667	0.615	0.4	0.538	0.769	0.769		303.931	311.348	419.994	681.019	761.732	956.868	271.746	262.662	516.345	233.868
Firmicutes	Clostridia	Clostridiales	Lachnospiraceae	sf_5	4514	77791	AB088983.2	termite gut homogenate clone Rs-B34 bacterium	1	1	1	1	0.966	0.966	1	1	1	1	1	1	1	1	0.966	1	1	1	1	1	1	1	1	1	1	1	1	1	1	1		4428.55	3770.66	3453.59	1897.47	1917.81	2086.72	2659.3	2613.64	2265.49	2839.05
Firmicutes	Mollicutes	Acholeplasmatales	Acholeplasmataceae	sf_1	4092	60694	AY083605.1	Australia isolate str. BVGY	0.825	0.878	0.7	0.7	0.692	0.711	0.756	0.756	0.692	0.902	0.854	0.875	0.8	0.775	0.667	0.75	0.725	0.732	0.78	0.8	0.829	0.732	0.667	0.78	0.951	0.875	0.829	0.975	0.927	0.951		2006.8	1880.54	1812.7	1319.05	1252.7	1376.58	1299.57	1260.34	1209.57	1486.6
Bacteroidetes	Bacteroidetes	Bacteroidales	Porphyromonadaceae	sf_1	5932	77773	AB088940.1	termite gut homogenate clone Rs-P41 bacterium	0.917	0.917	0.917	0.917	0.833	0.917	0.833	0.833	0.917	0.917	1	1	0.917	0.917	0.833	0.833	0.833	0.833	0.833	0.833	0.833	0.833	0.833	0.833	1	0.917	0.833	0.917	1	0.917		2583.41	1958.14	2405.42	1125.59	1283.03	1595.99	1568.31	1700.27	1683.93	1668.8
Firmicutes	Clostridia	Clostridiales	Lachnospiraceae	sf_5	3075	70039	AJ312385.1	Roseburia intestinalis str. L1-82	0.93	0.931	0.912	0.875	0.857	0.929	0.927	0.944	0.857	0.911	0.927	0.895	0.877	0.852	0.852	0.907	0.891	0.904	0.911	0.943	0.944	0.926	0.887	0.907	0.895	0.909	0.893	0.927	0.879	0.895		3646.09	3029.18	2833.6	1817.35	1813.33	1973.82	2039.6	2138.04	1979.62	2065.83
Bacteroidetes	Bacteroidetes	Bacteroidales	Porphyromonadaceae	sf_1	5680	82191	AB100460.1	termite gut clone Rs-106	1	1	0.909	1	0.9	0.9	1	1	1	1	1	1	0.909	0.909	0.909	0.909	0.909	0.909	1	1	1	1	0.909	1	1	1	1	1	1	1		3655.79	2891.22	2819.96	1424.57	1001.04	1443.04	2151.91	2113.18	2071.63	2172.8
Firmicutes	Unclassified	Unclassified	Unclassified	sf_8	4536	62670	AF507891.1	Mono Lake at depth 35m station 6 July 2000 clone ML635J-14 G+C	1	1	0.909	0.895	0.944	0.85	0.909	0.909	0.95	0.955	0.909	1	0.95	0.85	0.85	0.905	0.864	0.864	0.955	0.909	0.909	0.909	0.95	0.955	1	0.864	0.909	0.864	0.955	0.864		3068.41	2893.14	2509.05	1784.13	1869.5	1707.07	1668.58	1626.77	1616.03	1711.41
Firmicutes	Clostridia	Clostridiales	Lachnospiraceae	sf_5	4613	40552	AB034003.1	rumen clone 3C0d-3	1	1	1	1	0.917	0.917	1	1	1	1	1	1	1	1	0.917	1	1	1	1	1	1	1	1	1	1	1	1	1	1	1		3724.77	3306.99	2778.14	1303.41	1360.56	1104.36	2275.25	2435.29	1557.97	2393.07
Bacteroidetes	Flavobacteria	Flavobacteriales	Flavobacteriaceae	sf_1	6251	NA			0.333	0.889	0.8	0.9	0.8	1	0.9	0.9	1	0.8	0.8	0.9	1	1	1	0.9	1	0.8	1	0.9	0.6	1	0.7	0.9	1	0.8	0.5	0.636	1	0.909		94.8436	466.543	740.898	362.494	294.357	464.322	324.892	286.442	788.811	263.781
Firmicutes	Clostridia	Clostridiales	Clostridiaceae	sf_12	4418	77804	AB088966.2	termite gut homogenate clone Rs-H18 bacterium	0.958	1	0.958	0.958	1	0.958	1	1	1	0.96	1	1	0.958	0.958	0.958	1	1	0.958	0.96	1	0.96	1	0.958	0.96	1	1	0.96	1	0.96	1		3257.02	2980.32	2529.96	1620.96	1626.83	1861.84	2032.58	2109.94	1808.1	2051.33
Firmicutes	Clostridia	Clostridiales	Clostridiaceae	sf_12	4566	29413	AF371796.1	swine intestine clone p-2657-65A5	0.968	0.935	0.968	1	0.964	0.964	0.968	0.968	0.968	0.968	0.968	0.968	0.968	1	0.967	1	0.968	0.968	0.968	0.968	0.968	0.968	1	0.968	0.968	0.968	0.968	0.968	0.968	0.968		3893.98	3235.14	2983.59	1977.59	1833.55	2219.64	2565.04	2287.21	2244.05	2451.99
Firmicutes	Mollicutes	Unclassified	Unclassified	sf_6	149	15724	M23730.1	Streptococcus pleomorphus	1	1	1	0.75	0.818	0.818	0.917	0.917	0.833	0.917	0.917	0.917	0.75	0.636	0.667	0.833	0.833	0.833	0.917	0.917	0.833	0.818	0.75	0.833	0.917	0.917	0.917	0.917	0.917	0.917		3039.31	2618.2	2321.78	1693.27	2151.5	2448.16	1467.03	1646.23	1641.94	1782.11
Firmicutes	Clostridia	Clostridiales	Lachnospiraceae	sf_5	4167	77698	AB089038.1	termite gut homogenate clone Rs-D76 bacterium	1	0.909	1	0.6	0.778	0.8	0.8	0.9	0.9	0.9	1	1	0.9	0.8	0.889	0.889	0.778	0.778	1	0.9	0.9	0.889	0.667	0.8	1	0.9	0.7	1	1	1		2225.59	1866.17	1584.52	963.393	1021.26	926.823	1260.46	1137.12	1231.9	1080.51
Firmicutes	Clostridia	Clostridiales	Clostridiaceae	sf_12	4267	82016	AB100485.1	termite gut clone Rs-114	0.902	0.951	0.927	0.947	0.895	0.947	0.974	0.974	0.974	0.95	0.927	0.927	0.949	0.949	0.872	0.949	0.949	0.878	0.925	0.925	0.925	0.949	0.875	0.949	0.975	0.974	0.902	0.927	0.95	0.95		2814.05	2570.3	2129.97	998.567	965.085	1433.94	1639.5	1804.04	1440.05	1828.34
Proteobacteria	Gammaproteobacteria	Pasteurellales	Pasteurellaceae	sf_1	8228	49124	AF268964.1	Actinobacillus indolicus str. H1419	0.957	0.957	1	0.75	0.636	0.714	0.727	0.818	0.864	0.727	0.727	0.762	0.727	0.571	0.714	0.773	0.6	0.591	0.826	0.727	0.783	0.684	0.7	0.609	0.826	0.864	0.773	0.773	0.773	0.773		3356.17	1926.52	1521.8	1829.08	1479.65	1514.96	1303.58	1420.32	1401.64	1414.09
Actinobacteria	Actinobacteria	Rubrobacterales	Rubrobacteraceae	sf_1	1298	NA			0.818	0.808	0.667	0.64	0.64	0.615	0.846	0.846	0.808	0.962	1	0.923	0.577	0.5	0.462	0.625	0.667	0.625	0.692	0.625	0.696	0.708	0.619	0.625	1	0.84	0.692	0.769	1	0.923		1540.13	962.783	959.986	788.497	811.166	942.301	547.503	624.767	633.371	682.568
Bacteroidetes	Bacteroidetes	Bacteroidales	Rikenellaceae	sf_5	5947	57462	AJ441218.1	hydrothermal vent polychaete mucous clone P. palm C/A 221	0.818	0.909	0.909	1	0.909	1	1	1	1	1	1	1	1	1	0.818	0.727	0.818	0.727	0.909	0.909	0.909	0.909	0.909	0.909	1	0.909	0.818	1	1	1		2332.29	1824.98	2114.51	1974.66	2066.11	1887.33	1177.23	1390.05	1415.93	1494.76
marine group A	mgA-1	Unclassified	Unclassified	sf_1	6408	101444	AACY01094130.1	Sargasso Sea	1	1	1	1	1	1	1	1	1	1	1	1	1	1	1	1	1	1	1	1	1	1	0.882	1	1	1	1	1	1	1		1757.84	2237.87	2634.51	1930.69	2012.19	2565.61	1625.46	1446.26	1987.66	1825.62
Bacteroidetes	Bacteroidetes	Bacteroidales	Porphyromonadaceae	sf_1	5429	NA			0.895	0.905	0.909	0.632	0.619	0.619	0.7	0.667	0.619	0.857	0.905	0.8	0.667	0.6	0.5	0.65	0.65	0.6	0.955	0.818	0.714	0.65	0.636	0.7	0.727	0.667	0.667	0.762	0.81	0.857		832.037	733.823	1158.17	757.231	532.538	736.542	687.889	606.391	799.531	804.941
Firmicutes	Clostridia	Clostridiales	Clostridiaceae	sf_12	4502	NA			0.917	0.917	1	1	0.889	0.9	0.833	0.917	1	1	1	1	1	0.7	0.8	0.909	1	0.917	1	1	1	1	1	0.917	1	1	1	1	1	1		3043.62	2668.01	2528.15	2283.42	3070.52	2129.51	1612.43	1824.58	1668.74	1950.71
Firmicutes	Clostridia	Clostridiales	Clostridiaceae	sf_12	4357	85903	AF550610.1	Lachnospiraceae bacterium 19gly4	1	1	1	1	0.968	0.968	1	1	1	1	1	1	1	1	0.969	1	1	1	1	1	1	1	1	1	1	1	1	1	1	1		3986.67	3346.27	3111.77	1960.98	1849.28	2249.69	2685.37	2436.37	2407.52	2557.14
Firmicutes	Bacilli	Bacillales	Paenibacillaceae	sf_1	3299	63084	AF378230.1	Brevibacillus borstelensis str. LMG 15536	1	1	1	1	0.818	0.909	1	1	0.917	1	1	1	1	1	1	1	0.917	0.917	1	0.917	1	1	0.917	1	1	1	1	1	1	1		2451.92	2895.06	2416.33	1399.17	1474.03	1864.57	1332.66	1548.95	1619.61	1612.6
Firmicutes	Clostridia	Clostridiales	Clostridiaceae	sf_12	4507	77761	AB088984.1	termite gut homogenate clone Rs-N21 bacterium	0.962	0.962	0.962	1	1	1	1	1	0.962	1	1	1	0.923	0.923	0.962	0.962	0.962	0.962	0.962	0.962	0.962	1	0.962	0.962	1	1	0.962	1	1	1		3541.55	3127.85	2846.32	1796.83	1749.29	1959.26	2174.97	2228.84	1886.71	2305.14
Firmicutes	Bacilli	Lactobacillales	Unclassified	sf_1	3289	20210	AJ302648.1	Isobaculum melis CCUG 37660T	0.727	0.833	0.583	0.636	0.7	0.727	0.364	0.545	0.636	0.909	0.818	0.818	0.455	0.364	0.455	0.583	0.364	0.455	0.917	0.417	0.75	0.545	0.545	0.636	0.909	0.727	0.364	0.818	0.909	1		542.118	1082.53	791.807	433.82	501.08	545.351	266.732	278.875	447.558	491.304
Bacteroidetes	Flavobacteria	Flavobacteriales	Flavobacteriaceae	sf_1	5641	NA			0.667	0.9	1	1	1	1	0.917	0.909	0.917	1	1	0.909	1	1	0.833	0.9	0.727	0.667	0.75	1	0.7	0.818	0.636	0.667	0.846	1	0.9	1	1	1		93.7659	834.412	708.172	1968.8	1427.97	1865.48	780.142	744.748	1458.81	539.347
Firmicutes	Bacilli	Bacillales	Bacillaceae	sf_1	3635	76677	AJ504797.1	Bacillus aeolius str. 4-1	0.818	0.583	0.778	0.667	0.778	0.583	0.583	0.692	0.727	0.714	0.846	0.692	0.667	0.778	0.6	0.75	0.75	0.4	0.571	0.636	0.727	0.455	0.556	0.364	0.857	0.538	0.417	0.917	0.923	0.714		580.917	635.15	833.624	472.903	270.763	456.128	377.035	382.643	634.264	462.297
Unclassified	Unclassified	Unclassified	Unclassified	sf_105	1995	NA			0.5	0.583	0.417	0.455	0.5	0.5	0.455	0.545	0.455	0.636	0.636	0.545	0.455	0.5	0.455	0.545	0.75	0.417	0.5	0.545	0.636	0.5	0.417	0.417	0.615	0.75	0.417	0.833	0.917	0.769		674.683	903.388	674.536	410.37	296.604	502.56	567.559	570.721	571.731	635.432
Bacteroidetes	Sphingobacteria	Sphingobacteriales	Crenotrichaceae	sf_11	5987	NA			0.875	1	0.667	0.625	0.625	0.625	0.778	0.667	0.667	0.778	0.778	0.636	0.625	0.429	0.444	0.778	0.556	0.667	0.8	0.667	0.778	0.444	0.375	0.444	0.727	0.778	0.667	0.667	0.778	0.667		294.231	456.963	421.812	164.148	186.501	383.293	171.471	174.027	259.959	218.458
Firmicutes	Clostridia	Clostridiales	Clostridiaceae	sf_12	4576	53902	AB045286.1	Clostridium perfringens str. 13	1	0.609	0.2	0.176	0.118	0.111	0.211	0.286	0.391	0.5	0.238	0.524	0.333	0.211	0.19	0.211	0.118	0.1	0.522	0.591	0.545	0.2	0.25	0.353	0.696	0.65	0.278	0.391	0.682	0.6		333.03	180.103	82.7261	89.8906	53.9279	53.7157	56.1542	73.502	119.706	115.121
Firmicutes	Clostridia	Clostridiales	Lachnospiraceae	sf_5	2709	113050	AY916314.1	human stool clone B065	1	1	1	0.917	0.917	0.917	0.917	0.917	0.917	0.917	0.917	0.917	0.917	0.833	0.833	0.917	0.917	0.917	0.917	0.917	0.917	0.917	0.833	0.917	0.917	0.917	0.917	0.917	0.917	0.917		3030.69	2748.48	2587.24	1756.77	1885.23	1978.38	1597.39	1971.58	1584.77	1944.37
Bacteroidetes	Bacteroidetes	Bacteroidales	Porphyromonadaceae	sf_1	5652	78288	AB088943.1	termite gut homogenate clone Rs-D29 bacterium	0.833	0.833	0.833	0.917	0.833	0.833	0.917	0.917	0.917	1	0.917	0.917	0.917	0.833	0.917	0.917	0.917	0.917	0.833	0.833	0.833	0.917	0.833	0.917	0.917	0.917	0.917	0.917	0.917	0.917		3804.52	2807.88	3457.22	2228.7	2196.44	1748.04	2208.06	2259.11	1813.46	2276.13
Chloroflexi	Chloroflexi-4	Unclassified	Unclassified	sf_2	2511	13754	AF005747.2	deep subsurface paleosol clone H1.2.f	0.462	0.833	0.545	0.5	0.583	0.667	0.462	0.5	0.462	0.615	0.727	0.571	0.538	0.357	0.5	0.5	0.462	0.5	0.429	0.462	0.4	0.5	0.385	0.429	0.917	0.583	0.429	0.583	0.769	0.75		370.752	368.827	480.902	187.598	222.453	297.712	278.766	321.031	357.332	242.026
Proteobacteria	Betaproteobacteria	Burkholderiales	Alcaligenaceae	sf_1	7961	41229	AJ315485.1	isolate HuCC33 clone	0.958	0.773	0.909	0.75	0.75	0.842	0.667	0.7	0.8	0.682	0.714	0.667	0.8	0.737	0.7	0.75	0.75	0.737	0.667	0.75	0.667	0.75	0.842	0.7	0.667	0.8	0.591	0.762	0.762	0.8		2025.13	937.876	1115.44	509.054	395.471	659.155	1062.92	1181.44	975.517	1095.01
Firmicutes	Clostridia	Clostridiales	Clostridiaceae	sf_12	4637	81967	AB100473.1	termite gut clone Rs-088	1	0.917	0.917	1	0.8	0.9	1	1	1	1	0.909	1	0.8	0.7	0.7	1	1	0.9	1	1	1	1	0.9	0.9	1	1	1	0.909	0.833	0.909		3026.37	2336.55	2226.33	1284.85	978.567	1423.92	1780.89	1833.23	1533.85	2009.63
Firmicutes	Clostridia	Clostridiales	Unclassified	sf_17	4307	NA			1	1	0.938	1	0.938	0.938	0.941	0.941	0.941	0.941	0.941	1	0.941	0.941	0.941	1	1	1	1	1	0.941	1	0.938	1	1	1	0.941	0.941	1	0.941		3924.16	3168.08	2472.69	1978.57	2449.23	2596.56	1985.45	2213.71	2274.42	2260.72
Proteobacteria	Gammaproteobacteria	Pseudomonadales	Pseudomonadaceae	sf_1	8330	8211	U70702.1	Cape Hatteras picoplankton clone OM241	0.667	0.6	0.5	1	0.909	0.7	0.9	1	0.909	1	1	0.909	1	1	1	0.889	0.7	0.667	0.9	0.8	0.889	0.8	0.5	0.9	1	1	0.9	0.9	1	1		1860.23	788.429	677.263	980.003	462.881	831.227	645.773	703.674	753.971	816.725
Bacteroidetes	Sphingobacteria	Sphingobacteriales	Flexibacteraceae	sf_19	5805	2617	X90702.1	gram negative isolate str. IFAM 3359	0.889	0.727	0.778	0.778	0.778	0.778	0.818	0.818	1	1	1	1	1	0.909	0.75	0.778	0.8	0.778	0.8	0.889	0.7	0.727	0.8	0.636	0.909	0.909	0.636	0.818	0.909	1		627.261	300.81	608.173	156.331	135.943	357.801	251.691	327.516	448.452	474.988
Firmicutes	Clostridia	Clostridiales	Lachnospiraceae	sf_5	4155	77833	AB089039.1	termite gut homogenate clone Rs-K92 bacterium	0.941	0.943	0.943	0.879	0.848	0.848	0.912	0.912	0.912	0.941	0.941	0.941	0.853	0.824	0.794	0.882	0.912	0.882	0.941	0.912	0.912	0.912	0.912	0.912	0.941	0.912	0.886	0.941	0.943	0.941		3283.96	3088.57	2520.87	1786.09	1709.96	1666.1	2582.09	2653.64	2175.26	2413.01
Proteobacteria	Deltaproteobacteria	Desulfovibrionales	Desulfovibrionaceae	sf_1	10192	68469	AB081579.1	Desulfovibrio sp. str. A45	0.7	1	0.455	0.455	0.364	0.545	0.636	0.5	0.364	0.75	0.75	0.833	0.5	0.5	0.444	0.1	0.273	0.273	0.917	0.636	0.583	0.4	0.1	0.182	1	0.917	0.545	0.917	0.917	0.917		208.009	613.116	133.634	116.272	68.5334	180.266	87.2396	85.392	114.346	149.567
Proteobacteria	Epsilonproteobacteria	Nautiliales	Nautiliaceae	sf_1	10477	47967	AF299130.1	S17sBac5 complete clone	0.8	0.636	0.889	0.7	0.889	0.875	0.8	0.9	0.727	1	1	0.9	0.9	0.8	0.727	1	1	0.778	0.727	1	0.667	1	1	0.9	0.9	0.9	0.889	1	0.9	0.889		866.526	775.975	1783.61	315.594	388.73	477.979	704.936	1088.48	1111.3	1141.24
Cyanobacteria	Cyanobacteria	Oscillatoriales	Unclassified	sf_1	5215	3064	AJ000714.1	Lyngbya aestuarii str. PCC 7419	0.929	1	0.929	0.938	0.938	0.938	0.833	0.833	0.938	0.882	0.882	0.824	0.938	1	0.938	0.938	1	0.882	0.824	0.812	0.824	0.882	0.882	0.882	0.824	0.824	0.75	0.875	0.875	0.875		923.648	1528	1118.17	1798.79	1871.75	2373.5	1128.1	1030.11	1355.18	1672.43
Firmicutes	Bacilli	Bacillales	Sporolactobacillaceae	sf_1	3365	63834	AF454300.1	Bacillus sp. clone ML615J-19	1	0.929	0.929	0.833	0.909	0.833	1	1	0.846	0.929	0.929	1	0.846	0.75	0.846	1	1	0.923	1	1	0.929	1	0.643	1	0.929	0.929	1	0.929	0.929	0.929		1511.03	2025.2	1685.43	927.241	983.061	1055.19	927.547	1074.43	912.09	1131.27
Firmicutes	Clostridia	Clostridiales	Lachnospiraceae	sf_5	2801	81139	AY169412.1	Butyrivibrio fibrisolvens	0.926	0.926	0.889	0.833	0.815	0.887	0.885	0.902	0.849	0.889	0.885	0.891	0.849	0.778	0.863	0.88	0.846	0.939	0.906	0.902	0.885	0.902	0.86	0.882	0.907	0.887	0.83	0.865	0.855	0.885		3371.26	2863.44	2609.05	1831.03	1813.33	1959.26	1919.27	2065.62	1884.93	1950.71
Firmicutes	Bacilli	Lactobacillales	Streptococcaceae	sf_1	3290	101685	AY518677.1	Streptococcus mitis str. Sm91	1	1	1	0.9	0.9	1	0.818	0.917	0.909	0.917	1	0.917	0.9	0.9	0.909	0.75	0.818	0.818	0.917	1	0.917	0.818	0.818	0.818	0.917	1	0.833	0.917	1	0.833		2178.17	3271.55	3188.14	2703.56	2684.04	2343.46	2627.21	1938.07	2114.51	2244.41
Firmicutes	Clostridia	Clostridiales	Peptostreptococcaceae	sf_5	3200	14159	Z36273.1	infirmum str. W1471	0.929	0.933	0.778	0.722	0.769	0.75	0.875	0.875	0.812	0.875	0.875	0.824	0.824	0.75	0.8	0.8	0.8	0.75	0.824	0.812	0.824	0.812	0.733	0.812	0.824	0.812	0.812	0.824	0.875	0.824		967.836	1388.13	1004.53	344.906	406.706	562.649	746.049	806.36	855.81	907.371
Firmicutes	Clostridia	Clostridiales	Clostridiaceae	sf_12	4244	77963	AB089011.1	termite gut homogenate clone Rs-K46 bacterium	1	0.909	0.818	0.8	0.7	0.7	0.818	0.818	0.818	0.909	0.818	0.818	0.7	0.778	0.778	0.818	0.727	0.727	0.818	0.818	0.818	0.818	0.818	0.818	0.909	0.909	0.818	0.818	0.909	0.909		3588.97	2616.28	2420.87	2385.03	2188.57	2083.08	1945.34	1930.51	1774.15	1942.55
Firmicutes	Clostridia	Clostridiales	Clostridiaceae	sf_12	4524	81110	AB100476.1	termite gut clone Rs-093	1	1	1	0.955	0.909	0.955	0.955	0.955	1	1	1	0.955	1	0.955	0.952	1	1	1	1	1	1	1	0.952	0.955	1	1	0.955	1	1	1		3883.2	3586.73	3187.23	2324.45	2537.98	2433.59	2657.3	2629.86	2534.38	2759.28
Firmicutes	Bacilli	Lactobacillales	Streptococcaceae	sf_1	3251	80267	AY188347.1	Streptococcus cristatus str. ATCC 51100	1	1	1	0.929	0.857	0.929	0.867	0.933	0.933	1	1	0.933	1	0.929	1	0.929	0.929	0.929	1	1	1	0.929	0.857	0.867	1	1	0.933	1	1	0.933		2779.56	3535.95	3478.13	2527.68	2515.51	2485.49	2491.84	2282.89	2211.89	2671.35
Firmicutes	Clostridia	Clostridiales	Lachnospiraceae	sf_5	4572	77443	AF349415.1	pig feces clone	0.857	0.964	0.857	0.92	0.88	0.84	0.852	0.923	0.923	0.923	0.821	0.889	0.92	0.84	0.92	0.815	0.852	0.846	0.923	0.923	0.885	0.852	0.96	0.885	0.893	0.923	0.852	0.893	0.857	0.889		3263.48	3019.6	2899.05	2046.97	2127.91	2043.93	2189.01	2229.92	1901.01	2517.25
Firmicutes	Clostridia	Clostridiales	Lachnospiraceae	sf_5	3001	72481	AJ408972.1	human colonic clone HuCA20	0.857	0.857	0.786	0.727	0.727	0.818	0.769	0.769	0.818	0.769	0.846	0.923	0.75	0.7	0.818	0.75	0.75	0.909	0.929	0.75	0.769	0.727	0.583	0.833	0.923	0.917	0.692	0.714	0.769	0.769		3067.33	2804.05	2190.88	2745.57	2655.95	2005.69	2106.79	2263.43	2107.37	1987.88
Proteobacteria	Betaproteobacteria	Neisseriales	Neisseriaceae	sf_1	7701	6375	L06174.1	Vitreoscilla stercoraria	0.286	0.833	0.75	0.5	0.556	0.6	0.9	0.9	0.9	0.9	1	0.9	0.6	0.375	0.75	0.636	0.545	0.778	0.909	0.8	0.727	0.667	0.5	0.455	0.818	0.727	0.727	0.727	0.9	0.9		115.321	920.632	745.444	284.328	258.405	346.876	341.939	378.319	318.026	562.915
Firmicutes	Bacilli	Lactobacillales	Aerococcaceae	sf_1	3504	61165	AB083413.1	Marinilactibacillus psychrotolerans str. O21	0.941	0.9	1	0.765	0.8	0.929	0.8	0.75	0.882	1	1	0.85	0.789	0.765	0.789	0.842	0.722	0.722	0.95	0.833	0.9	0.667	0.667	0.667	1	0.895	0.667	0.895	0.947	0.842		1562.76	2088.43	1399.98	597.968	510.068	741.094	589.619	661.518	829.904	945.443
Bacteroidetes	Bacteroidetes	Bacteroidales	Rikenellaceae	sf_5	6032	109541	AJ518875.1	Bacteroides sp. str. ANH 2438	1	1	0.947	0.667	0.667	0.667	0.625	0.588	0.625	0.625	0.625	0.625	0.667	0.667	0.625	0.667	0.625	0.588	0.684	0.588	0.474	0.588	0.625	0.625	0.667	0.692	0.588	0.588	0.588	0.667		2197.57	1640.08	2015.43	1774.36	1940.28	1629.68	1523.18	1541.38	1502.58	1549.15
Proteobacteria	Gammaproteobacteria	Enterobacteriales	Enterobacteriaceae	sf_1	9202	52747	AF189697.1	Activated sludge isolate str. BC55	0.786	1	1	0.923	0.917	0.846	0.857	0.929	0.867	0.857	0.857	0.857	0.933	0.867	1	0.786	0.857	0.786	0.857	0.929	0.857	0.857	0.929	0.857	0.867	0.929	0.857	0.929	1	1		3826.08	2891.22	1290.89	492.444	251.664	486.172	1222.36	1569.48	1046.09	1426.78
Firmicutes	Clostridia	Clostridiales	Peptococc/Acidaminococc	sf_11	428	66174	AJ488090.1	chlorobenzene-degrading consortium clone IIIA-1	0.975	0.975	0.949	0.946	0.946	0.923	1	1	0.974	1	1	1	0.947	0.972	0.921	1	0.974	0.974	1	1	0.974	1	0.974	1	0.975	1	1	1	1	1		2756.93	1943.77	1256.35	1460.72	1376.29	1536.81	1459.01	1436.53	1471.31	1599.91
Firmicutes	Clostridia	Clostridiales	Lachnospiraceae	sf_5	4381	73826	AF376205.1	ckncm301-B3-28 clone	0.915	1	0.966	0.879	0.845	0.877	0.881	0.898	0.947	0.9	0.915	0.898	0.897	0.879	0.85	0.883	0.898	0.883	0.881	0.881	0.881	0.898	0.912	0.898	0.95	0.881	0.867	0.898	0.95	0.932		3697.82	3252.39	3030.87	2533.55	2678.42	2405.37	2518.92	2514.2	2388.76	2444.74
Firmicutes	Clostridia	Clostridiales	Clostridiaceae	sf_12	4369	77864	AB089032.1	termite gut homogenate clone Rs-N73 bacterium	1	1	1	1	0.957	0.957	1	1	1	1	1	1	1	1	0.957	1	1	1	1	1	1	1	1	1	1	1	1	1	1	1		4372.51	3833.89	3765.4	2093.86	2050.38	2380.79	2844.81	2819.02	2417.35	3252.4
Firmicutes	Bacilli	Lactobacillales	Streptococcaceae	sf_1	3499	15504	AF104676.1	Streptococcus constellatus str. ATCC27823	1	1	1	1	0.917	0.917	1	1	1	1	1	1	1	1	1	1	1	1	1	1	1	1	0.917	1	1	1	1	1	1	1		2650.23	4193.14	3682.67	2761.2	2580.68	2547.4	2821.75	2503.39	2552.24	2843.58
Firmicutes	Clostridia	Clostridiales	Clostridiaceae	sf_12	4185	27375	AJ276992.1	Clostridium uliginosum str. CK55	0.8	0.917	0.8	0.7	0.778	0.8	0.8	0.8	0.8	0.667	0.8	0.8	0.8	0.778	0.778	0.727	0.7	0.727	0.667	0.833	0.75	0.8	0.8	0.8	0.833	0.818	0.667	0.667	0.727	0.75		2682.57	2006.04	1940.88	1068.92	1396.51	1446.68	1320.63	1564.08	1367.69	1276.3
Bacteroidetes	Bacteroidetes	Bacteroidales	Porphyromonadaceae	sf_1	5295	72093	AF371910.1	swine intestine clone p-987-s962-5	0.909	1	1	0.909	0.909	0.909	1	1	1	1	1	1	1	0.909	1	1	1	1	1	1	1	1	1	1	0.909	1	1	0.909	0.909	0.909		3135.23	2774.35	3215.41	1761.66	2139.14	2321.61	2046.62	2286.13	2476.31	2248.94
Firmicutes	Bacilli	Lactobacillales	Aerococcaceae	sf_1	3840	15250	X87150.1	Trichococcus pasteurii str. KoTa2	0.857	0.985	0.97	0.61	0.618	0.722	0.922	0.891	0.855	0.985	0.985	0.922	0.831	0.655	0.785	1	0.778	0.75	1	0.969	1	0.694	0.638	0.766	0.952	0.969	0.762	0.955	0.985	0.985		1899.03	2818.42	2264.51	927.241	928.009	965.061	1164.2	1248.45	948.717	1434.93
Proteobacteria	Gammaproteobacteria	Alteromonadales	Alteromonadaceae	sf_1	8572	46627	AF227237.1	Pseudoalteromonas sp. str. A25	0.636	0.727	0.727	0.833	0.909	0.909	0.727	0.667	0.833	0.818	0.727	0.818	0.833	0.833	0.75	0.727	0.727	0.727	0.727	0.727	0.727	0.727	0.636	0.667	0.727	0.727	0.727	0.727	0.818	0.909		2527.37	1834.56	1438.16	1229.16	1057.21	1640.6	1682.62	1566.24	1471.31	2044.98
Cyanobacteria	Cyanobacteria	Oscillatoriales	Unclassified	sf_1	5077	58491	AB045906.1	Lyngbya var. hieronymusii str. CN4-3	0.818	0.833	0.75	0.833	0.833	0.917	0.833	0.833	0.917	1	1	0.917	0.917	0.667	0.75	0.667	0.833	0.833	0.917	0.75	1	0.833	0.727	0.917	0.923	0.833	0.75	1	1	0.917		440.807	666.763	438.175	913.562	865.094	1286.45	408.121	438.85	500.265	464.11
Actinobacteria	Actinobacteria	Actinomycetales	Microbacteriaceae	sf_1	1513	33272	AF263565.1	Microbacterium gubbeenense str. DPC 5284	0.571	0.583	0.5	0.929	0.786	0.818	0.857	0.846	0.857	0.538	0.615	0.833	0.857	0.857	0.923	0.5	0.857	0.538	0.455	0.385	0.417	0.615	0.545	0.643	1	0.846	0.538	0.583	0.833	0.692		229.565	226.086	238.178	583.312	183.13	186.639	358.986	399.937	1037.16	156.818
Firmicutes	Clostridia	Clostridiales	Lachnospiraceae	sf_5	3076	81063	AY169415.1	Clostridium nexile	1	1	1	1	0.895	0.947	1	1	1	1	1	1	0.9	0.947	0.9	0.95	0.95	1	1	1	1	1	0.95	1	1	1	1	1	1	1		3891.82	3156.59	3381.77	1815.4	1621.21	2226.01	2279.26	2509.88	2219.03	2687.67
Firmicutes	Clostridia	Clostridiales	Lachnospiraceae	sf_5	3038	68841	AF371648.1	swine intestine clone p-1594-c5	1	1	1	0.944	0.926	0.944	1	0.981	0.981	1	1	0.981	0.963	0.981	0.963	0.962	0.981	1	1	1	1	0.981	0.981	0.981	1	1	0.981	0.981	1	1		3751.71	3247.6	3298.13	2086.05	2090.83	2153.18	2375.52	2347.74	2128.81	2539.91
Firmicutes	Bacilli	Bacillales	Bacillaceae	sf_1	3918	57756	AF549498.1	Bacillus subtilis	0.971	0.857	0.971	0.625	0.677	0.656	0.914	0.943	1	0.943	0.971	0.943	0.943	0.853	0.943	0.914	0.886	0.829	0.944	0.941	0.917	0.943	0.909	0.943	1	0.943	0.857	0.943	0.971	0.971		1639.29	1735.88	1223.62	527.619	422.435	586.32	537.476	604.23	696.798	901.933
Firmicutes	Clostridia	Clostridiales	Lachnospiraceae	sf_5	3022	23653	AJ229214.1	anoxic bulk soil flooded rice microcosm clone BSV70 clone	0.944	0.824	0.867	0.8	0.8	0.8	0.765	0.765	0.8	0.812	0.824	0.833	0.867	0.929	0.75	0.75	0.812	0.778	0.941	0.765	0.778	0.765	0.812	0.882	0.941	0.867	0.824	0.765	0.824	0.824		2214.81	1851.8	1948.15	1897.47	2048.14	1635.14	1463.02	1508.95	1465.06	1657.02
Firmicutes	Clostridia	Clostridiales	Lachnospiraceae	sf_5	2928	77537	AF349417.1	pig feces clone	0.917	1	0.917	0.75	0.583	0.667	0.75	0.75	0.818	0.833	0.75	0.75	0.667	0.636	0.75	0.75	0.667	0.75	0.833	0.75	0.75	0.75	0.75	0.75	0.833	0.75	0.75	0.75	0.75	0.833		2786.03	2549.22	2843.6	1551.59	1423.47	1373.85	1796.93	2008.33	1933.17	2098.47
Cyanobacteria	Unclassified	Unclassified	Unclassified	sf_5	5169	NA			0.8	0.812	0.75	0.75	0.8	0.812	0.625	0.75	0.933	0.688	0.824	0.765	0.867	0.667	0.733	0.733	0.733	0.688	0.556	0.688	0.647	0.667	0.667	0.75	0.778	0.8	0.471	0.812	0.875	0.867		1736.29	1608.47	1335.44	1536.93	1724.57	1869.12	890.445	992.277	1381.98	1108.61
Firmicutes	Bacilli	Lactobacillales	Streptococcaceae	sf_1	3722	54615	NC_002662.1	Lactococcus Il1403 subsp. lactis str. IL1403	0.955	1	1	0.952	0.905	0.952	1	0.957	1	1	1	1	0.957	0.87	0.957	0.957	0.957	0.913	1	1	1	0.957	0.957	0.957	1	1	1	1	1	1		2923.99	3223.65	2808.14	1187.14	1204.39	1373.85	2032.58	2176.96	1649.09	2306.05
Proteobacteria	Alphaproteobacteria	Azospirillales	Azospirillaceae	sf_1	7171	4549	Z29623.1	Azospirillum species	1	1	0.842	0.889	0.944	0.895	0.947	0.947	0.895	0.95	0.95	1	0.944	0.789	0.737	0.65	0.842	0.684	0.905	1	0.95	0.842	0.556	0.789	1	1	0.905	0.947	0.905	1		1184.47	982.901	699.081	433.82	485.351	557.186	439.206	520.999	775.411	561.102
Synergistes	Unclassified	Unclassified	Unclassified	sf_3	248	1637	U81706.2	anaerobic digestor clone vadinCA02	0.6	0.778	0.556	0.545	0.545	0.545	0.455	0.455	0.556	0.727	0.8	0.8	0.364	0.444	0.4	0.455	0.5	0.364	0.909	0.636	0.818	0.556	0.4	0.5	0.7	0.7	0.5	0.727	0.727	0.8		1003.4	1180.25	744.535	415.255	474.116	734.721	496.363	527.485	709.304	576.512
Cyanobacteria	Cyanobacteria	Prochlorales	Unclassified	sf_1	5076	92037	NC_005072.1	Prochlorococcus marinus subsp. pastoris str. CCMP1986	0.773	0.818	0.81	1	1	1	0.88	0.917	0.92	0.792	0.8	0.792	1	0.96	0.96	0.8	0.88	0.92	0.8	0.773	0.68	0.8	0.826	0.88	0.87	0.818	0.682	0.909	0.917	0.818		1077.77	1046.13	884.533	1539.86	1690.86	2093.09	649.784	717.725	994.276	715.201
Proteobacteria	Gammaproteobacteria	Cardiobacteriales	Cardiobacteriaceae	sf_1	8536	7763	M35014.1	Cardiobacterium hominis	0.923	0.857	0.583	0.357	0.167	0.643	0.538	0.538	0.846	0.538	0.538	0.538	1	0.357	0.462	0.5	0.455	0.167	0.923	0.538	0.538	0.333	0.364	0.167	0.615	0.545	0.5	0.583	0.769	0.75		320.097	248.12	389.994	64.4867	40.4459	101.969	150.413	245.367	202.786	314.543
Firmicutes	Clostridia	Clostridiales	Peptostreptococcaceae	sf_5	1037	81585	AY169425.1	Finegoldia magna	0.933	0.933	0.933	0.8	0.8	0.867	0.933	0.933	0.933	0.933	0.933	0.933	0.933	0.933	0.933	0.933	0.933	0.933	0.933	0.933	0.933	0.867	0.867	0.933	0.933	0.933	0.867	0.867	0.933	0.933		2880.88	3123.06	3008.14	2040.13	1902.08	1762.6	2290.29	1944.56	1825.07	2141.07
Firmicutes	Bacilli	Lactobacillales	Lactobacillaceae	sf_1	3526	27633	AF401673.1	Lactobacillus sakei	0.929	0.893	0.68	0.565	0.56	0.708	0.63	0.607	0.692	0.857	0.815	0.759	0.556	0.652	0.577	0.615	0.538	0.519	0.793	0.667	0.786	0.6	0.52	0.556	0.897	0.704	0.5	0.704	0.786	0.692		1112.26	1105.52	1100.89	898.906	714.545	987.822	768.109	669.084	821.864	870.206
Proteobacteria	Gammaproteobacteria	Enterobacteriales	Enterobacteriaceae	sf_1	8974	9711	U92197.1	Salmonella subsp. enterica serovar Agona str. Sa1 subsp.	0.765	0.765	0.882	0.812	0.867	0.867	0.882	0.824	0.882	0.824	0.882	0.765	0.941	0.941	0.882	0.882	0.765	0.588	0.882	0.824	0.882	0.824	0.75	0.824	0.824	0.882	0.882	0.882	0.882	0.882		3308.75	2287.69	1469.07	1681.54	2008.81	1891.88	1607.41	1431.13	1590.13	1356.98
Proteobacteria	Alphaproteobacteria	Bradyrhizobiales	Hyphomicrobiaceae	sf_1	7646	4635	Y14304.1	Hyphomicrobium aestuarii str. DSM 1564	1	1	1	1	1	1	0.923	1	1	1	1	1	0.923	1	1	1	0.923	1	0.923	1	0.923	0.923	1	1	1	1	1	1	1	1		2897.04	2368.16	2015.43	2198.41	2266.1	2748.6	1463.02	2031.03	2101.11	1869.13
Actinobacteria	Actinobacteria	Actinomycetales	Corynebacteriaceae	sf_1	1237	NA			0.556	0.667	0.889	0.909	0.8	0.818	0.75	0.778	0.9	0.667	0.778	0.6	0.818	0.818	0.667	0.625	0.778	0.625	0.222	0.625	0.556	0.778	0.667	0.667	0.455	0.8	0.556	0.667	0.889	0.889		103.466	118.791	399.994	371.287	199.983	311.369	124.341	175.108	590.491	136.876
Firmicutes	Clostridia	Clostridiales	Lachnospiraceae	sf_5	4535	26738	AF376201.1	ckncm297-B1-1 clone	1	1	0.962	0.962	0.923	0.96	0.962	0.962	1	0.962	0.962	0.962	0.962	0.962	0.962	0.962	0.962	0.962	0.962	0.962	0.962	0.962	1	0.962	0.962	1	0.962	0.962	0.962	1		4308.92	3648.04	3522.68	2854.03	2946.94	3053.6	2838.8	2942.24	2944.42	2768.34
Firmicutes	Bacilli	Lactobacillales	Streptococcaceae	sf_1	3558	78223	AB089061.2	termite gut homogenate clone Rs-B70	0.818	1	0.7	0.5	0.375	0.5	0.5	0.6	0.6	0.818	0.727	0.636	0.667	0.5	0.75	0.556	0.556	0.556	1	0.727	1	0.556	0.556	0.5	0.8	0.7	0.6	1	1	0.818		1416.19	1386.22	1522.71	300.938	319.073	416.979	775.129	858.244	589.598	910.997
Bacteroidetes	Sphingobacteria	Sphingobacteriales	Flexibacteraceae	sf_19	6048	NA			0.667	0.545	0.455	0.9	0.8	0.9	0.818	0.818	0.909	0.9	0.909	0.833	0.909	0.727	0.818	0.8	0.818	0.667	0.636	0.909	0.545	0.818	0.9	0.909	0.818	0.727	0.455	0.636	0.9	0.6		395.541	245.246	269.087	234.497	178.636	293.16	448.231	331.84	820.97	326.327
Firmicutes	Bacilli	Bacillales	Sporolactobacillaceae	sf_1	3747	41956	AB043848.1	Bacillus sp. str. C-59-2	0.895	0.921	0.892	0.567	0.565	0.594	0.895	0.908	0.892	0.921	0.921	0.921	0.84	0.603	0.84	0.921	0.813	0.789	0.935	0.892	0.921	0.763	0.569	0.8	0.961	0.908	0.803	0.935	0.947	0.947		1342.9	1980.17	1500.89	847.121	880.823	916.808	689.894	783.661	841.517	1043.34
Unclassified	Unclassified	Unclassified	Unclassified	sf_37	5501	NA			0.545	0.923	0.769	0.692	0.615	0.692	0.643	0.75	0.615	0.692	0.615	0.714	0.667	0.545	0.727	0.636	0.636	0.583	0.538	0.909	0.462	0.636	0.545	0.636	0.667	0.8	0.538	0.538	0.769	0.75		524.873	554.678	496.356	596.991	601.071	751.109	455.25	436.688	661.064	476.801
Firmicutes	Clostridia	Clostridiales	Peptococc/Acidaminococc	sf_11	489	38984	AB034191.1	Anaerovibrio lipolyticus str. ATCC 33276	0.933	0.9	0.933	0.724	0.759	0.893	0.903	0.933	0.931	0.935	0.935	0.935	0.931	0.793	0.806	0.833	0.867	0.9	0.903	0.871	0.933	0.903	0.833	0.871	0.967	0.968	0.935	0.935	1	0.903		2497.19	2763.81	2528.15	477.788	462.881	689.2	1171.22	1290.61	1019.29	1534.65
Bacteroidetes	Flavobacteria	Flavobacteriales	Flavobacteriaceae	sf_1	5843	111531	AY871828.2	Riemerella anatipestifer str. 8755	0.75	1	1	0.769	0.769	0.769	1	1	1	1	1	1	0.812	0.733	1	1	1	1	1	1	1	1	1	1	1	1	0.938	0.812	1	1		1712.57	2703.46	3025.41	3503.78	3348.02	2791.39	2524.93	2201.82	2250.3	2414.82
Firmicutes	Clostridia	Clostridiales	Clostridiaceae	sf_12	4265	78138	AB088969.1	termite gut homogenate clone Rs-N70 bacterium	0.917	0.833	0.833	1	1	0.9	0.909	0.909	0.909	1	0.917	1	0.818	0.818	0.909	0.909	0.909	0.909	1	1	0.909	0.909	1	1	1	1	1	0.917	0.917	0.917		2045.6	1540.45	1677.25	1058.17	971.826	1379.31	1237.4	1490.58	1311.41	1685.12
Cyanobacteria	Cyanobacteria	Chloroplasts	Chloroplasts	sf_13	5000	72055	U67742.1	Mitrastema yamamotoi	1	1	1	1	1	1	1	1	1	1	1	1	1	1	1	1	1	1	1	1	1	1	1	1	1	1	1	1	1	1		1493.79	2295.35	1986.33	1840.8	1671.77	2066.69	1885.18	1595.43	1955.5	2409.38
Firmicutes	Clostridia	Clostridiales	Lachnospiraceae	sf_5	4540	78368	AB088968.1	termite gut homogenate clone Rs-M18 bacterium	0.926	0.962	0.963	0.963	0.926	0.926	0.963	0.963	0.963	0.963	0.963	0.963	0.963	1	0.926	0.963	0.963	0.963	0.963	0.963	0.963	0.963	0.963	0.963	0.963	0.963	0.963	1	0.963	1		4165.58	3717.01	3354.5	1529.12	1465.04	1635.14	2821.75	2854.69	2200.27	2995.87
Cyanobacteria	Cyanobacteria	Thermosynechococcus	Unclassified	sf_1	5012	62920	AF448081.1	Synechococcus sp. str. PCC 6312	0.885	0.885	0.852	0.964	1	0.931	0.964	0.931	0.931	0.964	0.897	0.931	0.964	0.897	0.862	0.889	0.926	0.793	0.821	0.852	0.857	0.929	0.923	0.828	0.931	0.857	0.857	0.897	0.931	0.929		3224.68	2850.99	2551.78	2458.31	2664.94	2937.06	2086.73	2159.66	2316.41	2304.23
Proteobacteria	Betaproteobacteria	Burkholderiales	Burkholderiaceae	sf_1	7848	NA			0.462	0.5	0.714	0.6	0.571	0.6	0.588	0.647	0.933	0.722	0.824	0.765	0.824	0.588	0.438	0.765	0.667	0.375	0.562	0.812	0.412	0.625	0.4	0.312	0.765	0.933	0.5	0.647	0.882	1		75.4438	303.684	458.175	86.9594	104.485	160.237	78.2148	123.224	245.666	130.531
Actinobacteria	Actinobacteria	Actinomycetales	Streptosporangiaceae	sf_1	1190	12120	U48977.1	Nonomuraea polychroma str. IFO 14345	0.75	1	0.762	0.714	0.684	0.842	0.864	0.864	0.909	0.955	0.955	0.909	0.955	0.818	0.864	0.773	0.905	0.714	0.773	0.727	0.909	0.727	0.476	0.714	1	0.955	0.818	0.955	1	0.955		930.114	865.068	845.442	1022.02	1043.73	1116.19	631.735	517.757	752.184	552.037
Firmicutes	Clostridia	Clostridiales	Clostridiaceae	sf_12	4364	69664	AF481208.1	oral endodontic infection clone MCE3_9	1	1	1	0.967	0.933	0.9	0.967	0.967	0.967	0.967	0.967	0.967	0.967	0.933	0.933	0.933	0.933	0.933	1	0.967	0.967	0.967	0.967	0.967	0.967	0.967	0.967	0.967	1	0.967		4266.89	3539.79	3346.32	2234.56	2173.97	2303.4	2743.53	2657.96	2467.38	2875.31
Proteobacteria	Gammaproteobacteria	Alteromonadales	Alteromonadaceae	sf_1	9254	37115	AJ292527.1	Marinobacter sp. Trimyema-1 1	0.714	0.812	0.75	0.8	0.714	0.733	0.812	0.765	0.875	0.765	0.765	0.778	0.75	0.688	0.647	0.632	0.444	0.529	0.842	0.824	0.722	0.5	0.533	0.353	0.944	0.824	0.75	0.706	0.789	0.938		1485.16	410.979	491.811	237.428	231.441	456.128	251.691	380.481	573.518	508.527
Unclassified	Unclassified	Unclassified	Unclassified	sf_72	415	NA			0.75	0.5	0.545	0.5	0.417	0.545	0.538	0.667	0.727	0.692	0.909	0.769	0.538	0.462	0.231	0.667	0.615	0.538	0.462	0.727	0.667	0.727	0.6	0.308	0.615	0.909	0.727	0.75	1	0.818		440.807	363.08	279.996	78.1657	69.6569	169.341	84.2313	131.871	159.906	164.07
Firmicutes	Bacilli	Lactobacillales	Enterococcaceae	sf_1	3318	60256	AF539705.1	Enterococcus ratti str. ATCC 700914	1	0.964	0.982	0.565	0.548	0.659	0.811	0.833	0.889	0.982	0.964	0.873	0.964	0.652	0.944	1	0.694	0.774	1	0.769	0.982	0.627	0.622	0.765	0.982	0.87	0.654	0.982	0.982	0.982		1771.85	2105.67	1897.25	1600.44	1760.52	1604.19	1176.23	1246.29	1169.37	1317.09
Proteobacteria	Alphaproteobacteria	Rhodobacterales	Rhodobacteraceae	sf_1	7246	NA			0.5	0.167	0.75	0.846	0.692	0.769	0.231	0.25	0.733	0.615	0.692	0.167	0.933	0.8	0.308	0.667	0.583	0.077	0.154	0.571	0.143	0.417	0.667	0	0.308	0.769	0.077	0.692	0.769	0.769		56.044	38.3197	335.45	118.226	149.425	206.669	33.0909	56.2074	158.119	67.0784
Firmicutes	Bacilli	Lactobacillales	Aerococcaceae	sf_1	3833	15257	L08623.1	Carnobacterium alterfunditum	1	0.85	0.9	0.722	0.667	0.722	0.85	0.85	0.9	0.9	0.9	0.85	0.9	0.722	0.85	0.9	0.895	0.8	0.9	0.85	0.95	0.684	0.632	0.9	1	0.8	0.789	0.9	0.9	0.9		2537.07	2533.89	2328.15	1469.52	1205.51	1264.59	1794.93	1851.6	1591.02	1747.66
Proteobacteria	Deltaproteobacteria	Unclassified	Unclassified	sf_9	10093	NA			0.81	0.842	0.714	0.773	0.857	0.8	0.85	0.81	0.8	0.8	0.9	0.81	0.8	0.7	0.526	0.895	0.727	0.667	0.727	0.818	0.636	0.773	0.85	0.739	0.818	0.857	0.81	0.864	1	0.85		1206.02	847.824	866.351	894.998	1120.13	963.241	402.104	435.607	569.945	685.287
Firmicutes	Clostridia	Clostridiales	Peptostreptococcaceae	sf_5	619	82015	AY217429.1	TCE-dechlorinating microbial community clone 1G	1	1	1	0.846	0.833	0.923	0.923	0.923	0.923	0.923	0.923	0.923	0.923	0.846	0.846	0.846	0.923	0.923	1	0.923	0.923	0.923	0.917	0.923	0.923	0.923	0.923	0.923	1	0.923		2858.24	3121.14	2719.05	1863.28	1802.09	1978.38	1590.37	1824.58	1800.95	2146.51
Firmicutes	Clostridia	Clostridiales	Clostridiaceae	sf_12	4272	78224	AB088965.1	termite gut homogenate clone Rs-M34 bacterium	1	1	0.967	1	0.967	0.967	1	1	1	1	1	1	1	1	0.967	1	1	1	1	1	1	1	0.967	1	1	1	1	1	1	1		4193.6	3588.64	3128.14	2923.4	2879.53	2894.27	3392.32	3578.9	3258.87	3274.15
Firmicutes	Bacilli	Bacillales	Halobacillaceae	sf_1	3702	62835	AJ496807.1	Amphibacillus xylanus str. DSM 6626	0.8	0.933	0.786	0.6	0.643	0.6	0.8	0.857	0.688	0.8	0.8	0.8	0.714	0.846	0.8	0.8	0.846	0.8	0.812	0.8	0.867	0.8	0.769	0.733	0.75	0.8	0.857	0.8	0.8	0.75		1813.88	2113.33	1812.7	820.74	913.404	884.033	1167.21	1229	999.636	1325.25
Firmicutes	Clostridia	Clostridiales	Peptococc/Acidaminococc	sf_11	126	59563	AY134907.1	oral periodontitis clone FY011	0.863	0.962	0.816	0.659	0.667	0.652	0.636	0.617	0.738	0.638	0.696	0.66	0.682	0.674	0.591	0.659	0.659	0.583	0.612	0.667	0.562	0.63	0.674	0.638	0.729	0.721	0.609	0.652	0.705	0.717		2588.8	2011.79	1382.71	2000.07	2038.03	1986.57	1901.22	1705.68	1897.43	1746.76
Firmicutes	Bacilli	Lactobacillales	Aerococcaceae	sf_1	3326	29998	AF255736.1	Nostocoida limicola I str. Ben206	0.875	0.987	0.973	0.691	0.688	0.778	0.932	0.918	0.875	0.986	0.986	0.932	0.851	0.706	0.811	1	0.822	0.784	1	0.973	1	0.75	0.701	0.795	0.958	0.973	0.778	0.96	0.987	0.987		2375.4	2844.28	2337.24	1481.24	1514.48	1578.69	1577.33	1650.55	1420.39	1832.87
Proteobacteria	Gammaproteobacteria	Enterobacteriales	Enterobacteriaceae	sf_1	9309	67659	AJ417833.1	Buchnera sp	0.889	0.824	0.889	1	0.941	0.941	0.882	0.722	1	0.765	0.833	0.882	1	0.944	0.941	0.882	0.938	0.824	0.778	0.875	0.833	0.875	1	0.833	0.889	0.778	0.938	0.944	1	0.889		4071.81	2661.31	1799.06	2308.82	2129.03	1915.56	2068.68	1945.64	1733.95	2173.7
Proteobacteria	Gammaproteobacteria	Enterobacteriales	Enterobacteriaceae	sf_1	9594	85645	AB089244.1	Morganella morganii str. ATCC35200	0.812	1	0.933	0.882	1	0.867	1	1	0.941	1	0.941	1	0.941	1	1	0.941	0.882	0.882	0.944	1	0.944	0.938	0.938	0.941	0.941	1	0.941	0.941	0.941	0.941		3313.06	2302.06	1282.71	757.231	343.79	724.707	1155.17	1461.39	1318.56	1371.48
Proteobacteria	Gammaproteobacteria	Enterobacteriales	Enterobacteriaceae	sf_1	9135	66560	AJ487029.1	intestine Zophobas mori clone	0.958	0.958	0.917	0.913	0.81	0.9	0.958	1	0.958	1	1	1	1	0.958	0.958	0.917	0.875	0.833	0.917	0.917	0.917	0.917	0.917	0.917	1	0.955	0.913	1	1	1		4529.86	3231.31	2145.42	2314.68	1679.63	1983.84	2720.47	2723.9	1973.37	2614.24
Firmicutes	Clostridia	Clostridiales	Lachnospiraceae	sf_5	2955	NA			0.889	1	0.824	0.533	0.6	0.533	0.438	0.5	0.533	0.533	0.5	0.533	0.6	0.6	0.5	0.438	0.533	0.533	0.5	0.533	0.5	0.533	0.533	0.533	0.6	0.533	0.533	0.533	0.438	0.571		726.416	836.328	967.259	885.227	1043.73	794.81	907.492	612.877	762.011	628.18
Firmicutes	Clostridia	Clostridiales	Lachnospiraceae	sf_5	2754	77466	AF349420.1	pig feces clone	1	1	0.765	0.538	0.583	0.615	0.8	0.688	0.6	0.8	0.8	0.75	0.571	0.583	0.533	0.714	0.643	0.529	0.75	0.75	0.75	0.6	0.571	0.643	0.8	0.8	0.8	0.8	0.8	0.8		2710.59	2402.65	2278.15	2240.43	2398.67	1718.9	2235.14	1962.94	1605.31	1722.28
Firmicutes	Clostridia	Clostridiales	Clostridiaceae	sf_12	4180	77848	AB089028.1	termite gut homogenate clone Rs-M23 bacterium	1	1	1	1	0.966	0.966	1	1	1	1	1	1	1	1	0.966	1	1	1	1	1	1	1	1	1	1	1	1	1	1	1		3458.56	3001.39	2737.23	1582.86	1432.46	1778.99	2609.16	2749.84	2247.62	2732.09
Proteobacteria	Gammaproteobacteria	Pasteurellales	Pasteurellaceae	sf_1	9628	82244	AF549390.1	Histophilus somni str. CCUG 12839	1	1	1	1	1	1	1	1	1	1	1	1	1	1	1	1	1	1	1	1	1	1	1	1	1	1	1	1	1	1		4279.82	2687.17	2155.42	1936.56	1522.34	1579.61	3369.25	3374.61	2035.9	3629.49
Firmicutes	Clostridia	Clostridiales	Clostridiaceae	sf_12	4638	NA			1	1	1	0.8	0.889	1	0.818	0.818	1	1	0.909	1	0.8	0.8	1	0.818	0.909	0.818	1	0.9	0.9	0.9	0.818	0.9	1	0.909	0.818	0.909	1	0.909		3218.22	3223.65	3286.32	2917.54	3171.64	3093.66	2931.05	2910.9	2596.91	3114.61
Firmicutes	Clostridia	Clostridiales	Peptococc/Acidaminococc	sf_11	131	77363	AF349425.1	pig feces clone	0.933	0.938	1	0.857	0.923	0.857	0.929	0.867	0.929	0.933	0.933	1	0.929	0.929	0.923	0.929	0.929	0.929	1	0.933	0.933	0.929	0.867	0.867	1	0.933	0.933	0.933	0.933	0.933		3303.36	2819.37	2527.24	1834.94	2123.41	2336.18	2345.44	1824.58	1931.38	1894.51
Proteobacteria	Epsilonproteobacteria	Campylobacterales	Campylobacteraceae	sf_3	10603	NA			0.818	0.929	0.938	0.667	0.583	0.6	0.923	0.733	0.769	0.733	0.8	0.923	0.75	0.692	0.583	0.769	0.714	0.643	0.929	0.875	0.8	0.929	0.75	0.857	0.929	0.733	0.786	0.8	0.75	0.786		522.718	1218.57	1499.98	486.582	230.317	391.487	853.343	634.495	512.772	727.891
Firmicutes	Bacilli	Lactobacillales	Lactobacillaceae	sf_1	3566	15142	X76329.1	Lactobacillus pontis str. LTH 2587	1	1	0.944	1	0.944	0.944	0.944	0.944	0.941	1	1	1	1	0.889	0.889	1	0.895	0.944	1	1	0.947	0.944	0.947	0.895	1	0.944	0.944	0.947	0.947	0.947		3895.06	3486.14	3209.95	2314.68	2147	2444.52	2878.91	2664.45	2591.55	2900.69
Firmicutes	Clostridia	Clostridiales	Lachnospiraceae	sf_5	4335	78375	AB088952.1	termite gut homogenate clone Rs-N86 bacterium	0.943	1	1	0.943	0.941	0.943	0.971	0.971	1	0.971	1	1	1	1	0.943	1	0.971	0.971	1	0.971	0.971	0.971	0.971	0.971	1	0.971	0.971	1	1	1		3164.33	2856.74	2550.87	1295.6	1142.6	1717.08	2009.52	2271	1687.5	2399.41
Proteobacteria	Gammaproteobacteria	Vibrionales	Vibrionaceae	sf_1	9465	NA			0.75	0.667	0.312	0.471	0.6	0.765	0.824	0.882	0.737	0.824	0.895	0.944	0.789	0.667	0.65	0.389	0.353	0.375	0.882	0.765	0.722	0.312	0.294	0.353	0.947	0.824	0.5	0.556	0.824	0.632		367.519	211.717	127.271	105.524	104.485	304.996	160.441	202.13	413.612	190.358
Planctomycetes	Planctomycetacia	Planctomycetales	Pirellulae	sf_3	4692	86221	BX294733.1	aerobic basin clone CY0ARA026G04	0.727	0.909	0.818	0.7	0.7	0.8	0.727	0.8	0.636	0.818	0.9	0.9	0.636	0.545	0.545	0.727	0.727	0.636	0.636	0.727	0.727	0.727	0.545	0.636	1	0.818	0.727	0.818	0.909	0.909		1000.17	1484.89	1130.89	693.721	817.907	943.211	723.988	791.227	720.917	1001.64
Firmicutes	Bacilli	Bacillales	Paenibacillaceae	sf_1	3910	40899	AJ288158.1	Paenibacillus sp. -234	0.765	0.741	0.596	0.54	0.56	0.64	0.574	0.618	0.7	0.772	0.768	0.782	0.569	0.551	0.54	0.655	0.528	0.444	0.714	0.673	0.741	0.593	0.592	0.527	0.912	0.895	0.579	0.898	0.966	0.949		1869.93	1712.89	1581.8	1465.61	1496.5	1493.11	1088.99	1214.94	1207.78	1354.26
Firmicutes	Clostridia	Clostridiales	Syntrophomonadaceae	sf_5	2543	NA			0.786	0.929	0.857	0.786	0.714	0.733	0.8	0.733	0.8	0.867	0.867	0.867	0.8	0.667	0.533	0.8	0.667	0.733	0.733	0.8	0.8	0.8	0.8	0.8	1	0.8	0.8	0.867	0.867	0.8		2292.41	1887.25	1112.71	553.023	547.144	1043.36	885.431	1173.87	883.504	1149.4
Proteobacteria	Alphaproteobacteria	Sphingomonadales	Sphingomonadaceae	sf_1	7624	71383	AJ429240.1	Sphingomonas aerolata str. NW12	0.769	0.625	0.615	0.643	0.538	0.692	0.941	0.941	0.765	0.765	0.824	0.941	0.867	0.75	0.75	0.625	0.647	0.562	0.824	0.647	0.706	0.647	0.692	0.75	0.889	0.938	0.706	0.765	0.722	0.722		1629.59	839.202	925.441	673.202	575.231	759.303	1133.11	1293.85	1104.16	1047.87
Proteobacteria	Betaproteobacteria	Rhodocyclales	Rhodocyclaceae	sf_1	7875	45179	AF245349.1	EBPR sludge clone SA34	0.214	1	0.75	0.267	0.214	0.214	0.769	0.846	0.786	0.769	0.8	0.923	0.429	0.462	0.583	0.692	0.571	0.571	0.929	0.923	1	0.769	0.533	0.571	0.938	0.867	0.688	0.938	0.941	0.941		31.2553	704.125	879.987	41.037	26.964	48.2531	291.801	559.912	560.118	397.032
Actinobacteria	Actinobacteria	Acidimicrobiales	Acidimicrobiaceae	sf_1	1853	75774	AJ532727.1	uranium mining waste pile clone JG34-KF-316	0.833	0.833	0.75	0.75	0.818	0.75	0.643	0.714	0.818	0.75	0.6	0.769	0.75	0.75	0.667	0.75	0.643	0.714	0.692	0.818	0.615	0.75	0.667	0.692	0.765	0.818	0.615	0.611	0.889	1		1473.31	1787.62	1526.34	1754.82	2044.77	1861.84	1056.9	1281.96	1542.78	1385.08
Actinobacteria	Actinobacteria	Actinomycetales	Corynebacteriaceae	sf_1	1428	73498	AF537604.1	Corynebacterium simulans National Microbiology Laboratory Special identifier 00-0186	1	0.923	0.923	0.846	0.769	0.846	0.846	0.846	0.846	0.923	0.846	1	0.769	0.769	0.923	0.846	0.846	0.846	1	0.923	0.923	0.846	0.833	0.846	0.923	0.846	0.769	0.923	1	0.923		1292.24	1094.99	1146.35	1121.68	941.491	1341.07	545.498	599.906	1124.7	910.091
Cyanobacteria	Unclassified	Unclassified	Unclassified	sf_5	4993	38561	AJ133106.1	Oscillatoria sp	0.818	0.909	1	0.909	1	1	0.917	0.833	0.833	1	0.917	0.917	0.917	1	0.917	0.909	0.909	0.833	0.917	0.909	0.917	1	0.909	0.917	1	0.909	0.833	1	0.917	1		1871.01	2079.8	1935.43	2162.26	2191.94	2559.23	1717.72	1633.26	1951.93	1547.34
Firmicutes	Clostridia	Clostridiales	Clostridiaceae	sf_12	4559	85153	AY244908.1	cow rumen clone BF30	0.944	0.944	1	0.941	0.941	0.941	0.944	0.944	0.944	1	1	1	0.944	0.944	0.944	0.944	0.944	0.944	1	1	1	1	0.944	1	1	1	1	1	1	1		3521.07	2978.4	2913.59	1918.97	1873.99	2087.63	2447.72	2475.29	2330.7	2497.31
Firmicutes	Clostridia	Clostridiales	Lachnospiraceae	sf_5	3042	68844	AF371584.1	swine intestine clone p-2876-6C5	1	1	1	0.95	0.875	1	1	1	1	1	1	1	0.976	0.902	0.927	0.976	1	1	1	0.976	1	0.976	0.95	1	1	0.976	0.976	0.976	1	0.976		4024.39	3291.67	3161.77	2307.84	2391.93	2405.37	2639.25	2666.61	2235.11	2813.67
Firmicutes	Clostridia	Clostridiales	Clostridiaceae	sf_12	4475	78184	AB089035.1	termite gut homogenate clone Rs-N02 bacterium	1	1	1	0.955	0.909	0.909	1	1	1	1	1	1	0.957	0.955	0.87	0.957	1	0.957	1	1	1	1	1	1	1	1	1	1	1	1		3950.02	3591.52	2989.05	2095.82	1998.7	1990.21	3446.46	3596.19	2880.99	3110.99
Proteobacteria	Gammaproteobacteria	Pasteurellales	Pasteurellaceae	sf_1	9263	9585	M75067.1	Actinobacillus capsulatus	0.911	0.979	0.913	0.822	0.689	0.756	0.826	0.848	0.848	0.913	0.87	0.911	0.844	0.711	0.773	0.822	0.795	0.756	0.83	0.8	0.783	0.8	0.689	0.783	0.915	0.891	0.848	0.848	0.87	0.913		3847.63	2367.2	2194.51	1945.35	1799.84	1649.71	2543.99	2754.16	1893.86	2748.4
Firmicutes	Clostridia	Clostridiales	Lachnospiraceae	sf_5	4366	66186	AJ488078.1	chlorobenzene-degrading consortium clone IB-18	0.909	0.75	0.75	0.833	0.75	0.75	0.75	0.75	0.75	0.75	0.75	0.75	0.818	0.818	0.727	0.818	0.818	0.818	0.75	0.818	0.818	0.818	0.818	0.818	0.75	0.818	0.818	0.75	0.833	0.75		3580.35	2915.17	3339.95	2142.72	2491.92	2320.7	2270.23	2443.94	2194.02	2522.69
Firmicutes	Bacilli	Lactobacillales	Streptococcaceae	sf_1	3253	67823	AF349918.1	derived cheese sample clone 32CR	0.923	1	0.96	0.636	0.565	0.667	0.84	0.875	0.87	0.875	0.875	0.84	0.87	0.652	0.833	0.875	0.792	0.875	0.84	0.875	0.84	0.75	0.609	0.875	0.84	0.875	0.792	0.875	0.875	0.875		1641.44	2804.05	2648.14	1915.06	1908.82	1594.17	1693.65	1650.55	1576.73	1642.51
Proteobacteria	Gammaproteobacteria	Enterobacteriales	Enterobacteriaceae	sf_1	8590	9947	AJ010486.1	Enterobacter pyrinus str. KCTC2520	0.947	0.842	0.706	0.688	0.667	0.571	0.875	0.722	0.688	0.778	0.824	0.778	0.875	0.667	0.824	0.824	0.588	0.6	0.895	0.824	0.889	0.812	0.6	0.75	0.947	0.882	0.824	0.882	0.882	0.824		1536.9	976.195	559.992	394.737	497.71	565.38	719.977	633.414	685.184	601.893
Proteobacteria	Gammaproteobacteria	Pasteurellales	Pasteurellaceae	sf_1	9533	17538	AF224299.1	Haemophilus segnis str. MCCM 00337	0.98	0.94	0.804	0.818	0.818	0.844	0.717	0.717	0.848	0.694	0.783	0.783	0.83	0.787	0.761	0.756	0.727	0.688	0.723	0.773	0.739	0.733	0.756	0.711	0.88	0.804	0.717	0.739	0.804	0.809		2923.99	1720.56	1613.61	1679.59	1487.51	1396.61	1824.01	1839.71	1557.97	1831.97
Proteobacteria	Deltaproteobacteria	Desulfovibrionales	Desulfovibrionaceae	sf_1	10051	NA			0.727	0.769	0.692	0.8	0.8	0.692	0.462	0.5	0.571	0.538	0.571	0.692	0.615	0.5	0.25	0.417	0.556	0.417	0.526	0.583	0.571	0.5	0.4	0.364	0.867	0.909	0.429	0.533	0.8	0.667		517.329	260.574	399.994	281.397	242.676	343.234	165.454	243.205	188.493	300.04
Firmicutes	Clostridia	Clostridiales	Clostridiaceae	sf_12	2790	39630	AF224675.1	Clostridium sp. str. FL4	0.8	0.929	0.741	0.44	0.478	0.652	0.607	0.679	0.654	0.889	0.852	0.857	0.536	0.375	0.414	0.778	0.741	0.571	0.897	0.793	0.793	0.679	0.52	0.556	0.931	0.821	0.778	0.964	0.964	0.964		656.361	930.212	701.808	511.986	526.921	746.557	457.256	441.012	521.705	581.044
Actinobacteria	Actinobacteria	Actinomycetales	Streptomycetaceae	sf_3	1743	54981	AB026214.1	Streptomyces scabiei str. DNK-G01	0.818	1	0.833	0.909	0.8	0.9	0.917	1	0.917	1	0.917	0.75	1	0.917	0.917	1	0.917	0.909	0.909	0.9	0.909	0.833	0.818	0.909	1	1	0.833	1	1	1		490.385	556.594	563.628	263.809	140.437	226.698	238.655	334.002	704.838	329.953
Spirochaetes	Spirochaetes	Spirochaetales	Spirochaetaceae	sf_1	6552	77955	AB088898.1	termite gut homogenate clone Rs-E91 sp.	0.818	0.9	1	0.818	1	0.9	0.833	1	0.818	0.833	0.833	0.75	0.818	0.9	0.889	0.9	0.9	0.8	0.818	0.9	0.818	0.9	1	0.833	0.818	0.909	0.833	0.909	0.833	1		1495.94	1577.82	1743.61	1399.17	1624.58	1824.51	1243.41	1328.44	1318.56	1375.11
Firmicutes	Clostridia	Clostridiales	Clostridiaceae	sf_12	4622	81946	AB100475.1	termite gut clone Rs-L36	0.958	1	1	0.958	0.958	1	0.958	0.958	1	1	1	0.958	0.958	0.917	1	1	1	1	1	1	1	1	0.958	0.958	1	1	1	1	1	1		3664.41	3166.17	2760.87	2417.28	2826.72	2649.37	2895.95	2533.66	2545.1	2653.22
Firmicutes	Bacilli	Bacillales	Paenibacillaceae	sf_1	3651	14377	AJ011323.1	Paenibacillus borealis KK20	0.875	0.938	0.875	0.812	0.812	0.867	0.824	0.882	0.875	0.941	0.941	0.941	0.812	0.812	0.812	0.824	0.765	0.765	0.824	0.812	0.941	0.765	0.867	0.765	1	1	0.941	0.941	0.941	0.941		2609.28	2691	2489.05	2106.57	2211.04	2495.5	1498.11	1815.93	1859.91	2084.87
Firmicutes	Clostridia	Clostridiales	Eubacteriaceae	sf_1	687	14230	X96955.1	Acetobacterium wieringae str. DSM 1911	0.733	0.941	0.75	0.846	0.786	0.846	0.733	0.688	0.769	0.688	0.688	0.8	0.769	0.769	0.667	0.786	0.786	0.667	0.941	0.688	0.75	0.786	0.857	0.786	0.824	0.688	0.733	0.706	0.941	0.706		1909.81	1850.84	1367.25	1180.3	1097.66	1422.1	1020.8	949.04	1207.78	1175.68
Bacteroidetes	Bacteroidetes	Bacteroidales	Porphyromonadaceae	sf_1	5961	55494	AJ488070.1	chlorobenzene-degrading consortium clone IA-16	1	1	0.938	1	0.929	0.929	1	1	1	1	1	1	0.875	0.933	0.938	0.875	0.875	0.875	1	1	1	1	0.875	1	1	1	1	1	1	1		4080.43	3180.54	3277.23	2234.56	2061.62	2317.97	2729.5	2634.18	2406.63	2711.24
Planctomycetes	Planctomycetacia	Planctomycetales	Pirellulae	sf_3	4736	2830	L10942.1	marine snow clone agg8	0.333	0.467	0.286	1	0.889	0.889	0.375	0.333	0.375	0.312	0.312	0.375	0.4	0.4	0.312	0.267	0.25	0.25	0.25	0.267	0.25	0.25	0.333	0.25	0.611	0.25	0.25	0.438	0.625	0.562		142.265	160.943	354.54	664.409	498.833	764.766	118.325	147.004	260.852	142.315
Firmicutes	Clostridia	Clostridiales	Clostridiaceae	sf_12	4297	NA			0.964	0.982	0.964	0.885	0.917	0.942	0.963	0.945	0.981	0.964	0.964	0.981	0.981	0.885	0.863	0.962	0.926	0.944	0.982	0.945	0.981	0.963	0.885	0.964	0.982	0.945	0.945	0.945	0.964	0.963		3192.35	2793.51	2276.33	1697.17	1707.72	1878.23	1852.09	2023.47	1691.07	2080.34
Firmicutes	Sulfobacillus	Unclassified	Unclassified	sf_1	3461	25382	AF213055.1	Sulfobacillus sp. Fras1	0.667	0.615	0.615	0.692	0.909	0.692	0.667	0.667	0.75	0.571	0.667	0.6	0.769	0.75	0.5	0.727	0.583	0.5	0.438	0.615	0.615	0.692	0.462	0.429	0.706	0.643	0.467	0.667	0.562	0.625		517.329	312.306	615.446	577.449	943.738	631.842	477.311	407.504	532.425	386.154
Bacteroidetes	Unclassified	Unclassified	Unclassified	sf_4	5638	62694	AF507864.1	Mono Lake at depth 35 m station 6 July 2000 clone ML635J-44 bacterium	0.75	0.9	0.778	0.905	0.95	0.9	0.905	0.857	0.905	0.857	0.857	0.905	0.905	0.905	0.905	0.85	0.85	0.85	0.81	0.85	0.85	0.81	0.85	0.81	0.905	0.81	0.81	0.9	0.9	0.9		1924.89	1799.11	2284.51	2111.45	2066.11	1940.14	2653.29	2346.66	2498.64	2393.97
Proteobacteria	Alphaproteobacteria	Sphingomonadales	Sphingomonadaceae	sf_1	7055	NA			0.562	0.684	0.5	0.529	0.562	0.625	0.6	0.652	0.9	0.636	0.652	0.696	0.895	0.895	0.889	0.579	0.526	0.524	0.48	0.5	0.435	0.667	0.45	0.455	0.963	0.957	0.68	0.696	0.87	0.818		1220.03	821	961.804	1203.75	1272.92	1028.79	1332.66	880.943	990.703	758.711
Actinobacteria	Actinobacteria	Actinomycetales	Corynebacteriaceae	sf_1	1820	13373	U87823.1	Corynebacterium jeikeium str. ATCC 43734	1	1	1	1	0.917	1	1	1	1	1	1	1	1	1	1	1	1	1	1	1	1	1	1	1	0.917	1	0.917	1	1	1		2481.02	2525.27	2534.51	1859.37	1849.28	2185.04	1827.02	1975.91	2089.5	2310.58
Firmicutes	Bacilli	Bacillales	Bacillaceae	sf_1	3848	78009	AB098576.1	Bacillus sp. str. TUT1007	0.918	0.849	0.824	0.66	0.612	0.68	0.942	0.925	0.922	0.906	0.889	0.962	0.87	0.723	0.889	0.922	0.796	0.846	0.925	0.87	0.887	0.824	0.62	0.796	0.906	0.922	0.811	0.852	0.887	0.87		1494.86	2218.71	1845.43	839.305	866.217	975.987	997.74	985.791	921.023	1211.04
Firmicutes	Clostridia	Clostridiales	Lachnospiraceae	sf_5	2708	72606	AF275914.2	anaerobic digester clone AA02	1	0.957	0.609	0.381	0.4	0.45	0.957	0.87	0.773	0.957	0.957	1	0.591	0.667	0.696	0.783	0.727	0.522	0.957	1	0.87	0.826	0.682	0.667	0.913	0.773	0.565	0.739	0.826	0.783		804.015	854.53	688.172	597.968	590.96	450.665	767.107	682.055	561.011	654.468
Proteobacteria	Gammaproteobacteria	Vibrionales	Vibrionaceae	sf_1	9593	70729	AF284226.1	Vibrio sp. str. 05	0.812	0.625	0.643	0.882	0.882	1	0.722	0.812	0.882	0.812	0.929	0.867	0.833	0.778	0.824	0.625	0.471	0.533	0.688	0.625	0.688	0.6	0.615	0.6	0.867	0.8	0.688	0.688	0.8	0.75		1246.98	850.698	458.175	820.74	574.108	792.079	468.286	606.391	886.184	531.188
Firmicutes	Bacilli	Bacillales	Staphylococcaceae	sf_1	3628	14771	X66100.1	Staphylococcus haemolyticus str. CCM2737	0.983	0.939	0.956	0.804	0.814	0.819	0.936	0.936	0.927	0.964	0.973	0.956	0.917	0.832	0.899	0.89	0.87	0.833	0.974	0.955	0.982	0.899	0.783	0.9	1	0.946	0.9	0.938	0.982	0.973		2858.24	2645.98	2432.69	1983.46	2096.45	1929.21	1946.34	1944.56	1923.34	2019.6
Proteobacteria	Gammaproteobacteria	Alteromonadales	Alteromonadaceae	sf_1	9132	8854	L10950.1	marine snow clone agg53	0.286	0.545	0.3	0.667	0.364	0.909	0.182	0.2	0.727	0.3	0.333	0.222	0.5	0.556	0.2	0	0	0	0.3	0.333	0.182	0.111	0	0.111	0.6	0.444	0.2	0.333	0.556	0.333		30.1775	132.203	81.817	98.6842	104.485	370.547	18.0496	33.5083	105.413	38.978
Gemmatimonadetes	Unclassified	Unclassified	Unclassified	sf_6	2554	60181	AJ347028.1	sponge symbiont clone TK19	0.917	0.833	0.833	0.917	0.917	0.917	0.75	0.75	0.75	0.833	0.833	0.917	0.75	0.667	0.75	0.75	0.75	0.833	0.833	0.833	0.75	0.75	0.667	0.75	0.917	0.833	0.75	0.75	1	0.833		3208.52	2461.09	2042.7	2099.73	2402.04	2506.43	1743.79	1970.5	1854.55	1866.41
Actinobacteria	Actinobacteria	Actinomycetales	Propionibacteriaceae	sf_1	2023	18155	AJ315953.1	Propionibacterium propionicum str. DSM 43307T	0.5	0.933	1	0.727	0.727	0.636	0.417	0.385	0.545	0.667	0.917	0.286	0.727	0.667	0.25	0.615	0.667	0.214	0.333	0.786	0.667	0.583	0.615	0.214	0.538	0.75	0.308	0.917	0.786	0.846		67.8994	596.83	772.716	159.263	150.549	260.385	411.129	394.533	318.026	432.384
Firmicutes	Catabacter	Unclassified	Unclassified	sf_4	4526	59913	AY133082.1	TCE-contaminated site clone ccslm210	0.972	1	0.972	0.861	0.853	0.944	0.971	0.944	0.971	0.972	0.972	0.971	0.972	0.833	0.8	0.971	0.943	0.971	1	1	0.972	0.971	0.806	0.971	1	0.972	0.972	1	1	0.972		3008.05	2611.49	2384.51	2353.77	2422.26	2073.06	2337.42	1958.61	1943.89	2068.55
Firmicutes	Bacilli	Lactobacillales	Aerococcaceae	sf_1	3386	34802	AF317386.1	feedlot manure clone B87	0.848	0.892	0.818	0.75	0.828	0.787	0.942	0.928	0.846	1	0.971	0.926	0.848	0.769	0.833	0.833	0.779	0.765	0.986	0.812	0.884	0.803	0.794	0.797	0.908	0.862	0.831	0.892	0.969	0.923		2780.64	2792.55	2366.33	1883.79	2139.14	2008.42	1809.97	1920.78	1671.42	2156.48
Cyanobacteria	Cyanobacteria	Nostocales	Unclassified	sf_1	5175	60838	AF516729.1	Cylindrospermopsis raciborskii str. 24C	0.943	0.917	0.917	0.972	0.972	0.972	1	1	0.972	1	0.972	1	0.972	0.972	0.972	0.861	0.917	0.917	0.861	0.806	0.861	0.917	0.853	0.917	1	0.917	0.917	0.972	1	0.972		1840.83	1875.75	1712.7	1998.11	2009.94	2065.78	1897.21	1623.53	1789.34	2033.2
Firmicutes	Clostridia	Clostridiales	Unclassified	sf_17	4168	NA			0.944	1	0.944	1	0.944	1	0.944	0.944	0.944	0.944	0.944	0.944	0.944	0.944	0.944	0.944	0.944	0.944	0.944	0.944	0.944	0.944	0.944	0.944	0.944	1	0.944	1	1	1		4242.1	3531.16	3414.5	3208.7	3167.14	3068.17	2973.16	2850.36	2538.84	2932.41
Unclassified	Unclassified	Unclassified	Unclassified	sf_160	2385	NA			0.9	0.8	1	0.7	0.778	0.7	0.9	0.818	0.778	0.833	0.833	0.75	0.778	0.875	1	0.7	0.8	0.7	0.8	0.8	0.8	0.778	1	0.9	0.833	0.818	0.818	0.818	0.909	0.909		2373.25	2345.17	2830.87	2982.02	3267.13	2519.17	2778.63	2108.86	2512.04	2034.11
Bacteroidetes	Bacteroidetes	Bacteroidales	Porphyromonadaceae	sf_1	5510	77508	AF524856.1	sphagnum peat bog clone 26-4b2	1	1	1	1	0.944	0.944	1	1	1	1	1	1	0.947	1	1	0.947	0.947	0.947	1	1	1	1	0.947	1	1	1	1	1	1	1		4127.85	3420.04	3559.95	2460.27	2262.73	2450.89	3133.61	3191.93	2850.62	3088.33
Proteobacteria	Gammaproteobacteria	Alteromonadales	Alteromonadaceae	sf_1	9011	NA			0.9	1	0.7	0.636	0.6	0.7	0.818	0.727	0.818	0.818	0.818	1	0.727	0.636	0.727	0.818	0.545	0.727	1	0.818	0.9	0.909	0.545	0.75	1	0.7	0.455	0.727	0.7	0.583		262.976	363.08	252.724	108.455	105.609	260.385	218.6	251.852	348.399	186.732
Bacteroidetes	Sphingobacteria	Sphingobacteriales	Flexibacteraceae	sf_19	5744	26447	AF445684.1	travertine hot spring clone SM1E06	0.333	0.429	0.5	0.545	0.333	0.429	1	0.917	0.923	0.727	0.667	0.667	1	0.846	0.833	0.4	0.6	0.273	0.625	0.625	0.5	0.333	0.3	0.273	0.583	0.545	0.455	0.667	0.667	0.667		358.897	296.978	320.904	190.529	205.6	352.338	624.716	582.611	857.597	272.846
Acidobacteria	Acidobacteria	Acidobacteriales	Acidobacteriaceae	sf_14	6364	112288	AY234728.1	Solibacter usitatus Ellin6076	0.947	1	0.895	0.737	0.706	0.812	0.95	0.95	1	1	1	1	0.9	0.85	0.947	0.833	0.9	0.85	0.95	0.947	0.947	0.947	0.889	0.9	1	1	1	1	1	1		2108.12	1934.19	1855.43	1362.04	1462.79	1321.04	1577.33	1526.25	1649.98	1587.22
Unclassified	Unclassified	Unclassified	Unclassified	sf_160	7444	NA			0.778	0.882	0.889	1	0.944	0.889	0.842	0.833	0.889	0.833	0.889	0.895	0.895	0.842	0.895	0.882	0.944	0.889	0.895	0.889	0.889	0.833	0.889	0.889	0.842	0.889	0.889	0.944	0.889	0.944		2038.06	1460.94	1428.16	1693.27	1500.99	1730.74	1767.85	1419.24	1809.89	1220.1
Cyanobacteria	Cyanobacteria	Pseudanabaena	Unclassified	sf_1	5008	62918	AF448080.1	Synechococcus sp. str. PCC 7502	1	1	1	1	1	1	1	1	1	1	1	1	1	1	1	0.913	0.957	0.957	0.87	0.826	0.826	0.957	0.87	0.957	1	1	0.957	1	1	1		2359.24	2099.92	1862.7	2259.97	2306.54	2151.36	2201.04	1892.68	1942.1	2035.92
Actinobacteria	Actinobacteria	Actinomycetales	Corynebacteriaceae	sf_1	1089	72264	AF537600.1	Corynebacterium mucifaciens National Microbiology Laboratory Special identifier 01-0118	0.889	0.909	0.909	0.905	0.857	0.952	0.905	0.864	0.952	0.87	0.913	0.87	0.909	0.952	0.864	0.905	0.957	0.864	0.909	0.87	0.87	0.87	0.826	0.909	0.913	0.957	0.783	0.913	0.957	0.957		1352.6	1422.62	1269.98	1270.19	1066.2	1359.28	1120.08	1076.59	1479.35	1172.97
Cyanobacteria	Cyanobacteria	Nostocales	Unclassified	sf_1	5028	60833	AF516732.1	Cylindrospermopsis raciborskii str. 05E	0.946	0.921	0.921	0.974	0.974	0.974	1	1	0.974	1	0.974	1	0.974	0.974	0.974	0.868	0.921	0.921	0.868	0.816	0.868	0.921	0.861	0.921	1	0.921	0.921	0.974	1	0.974		1922.74	1951.43	1731.79	2010.81	2012.19	2104.02	1922.28	1692.71	1808.99	2047.7
Firmicutes	Clostridia	Clostridiales	Clostridiaceae	sf_12	4271	73132	AJ488093.1	chlorobenzene-degrading consortium clone IIIA-3	0.889	0.842	0.941	0.75	0.75	0.812	0.812	0.765	0.875	0.824	0.833	0.882	0.875	0.875	0.812	0.875	0.875	0.812	0.778	0.882	0.778	0.812	0.875	0.812	0.824	0.875	0.824	0.882	0.941	0.882		1944.29	2266.61	2217.24	1812.47	1854.9	1585.07	2306.33	2360.71	2196.7	2097.56
Bacteroidetes	Sphingobacteria	Sphingobacteriales	Crenotrichaceae	sf_11	5266	NA			0.833	0.667	0.545	0.636	0.5	0.727	0.692	0.833	0.75	0.769	0.833	0.615	0.667	0.667	0.615	0.455	0.538	0.583	0.692	0.538	0.583	0.583	0.583	0.615	0.917	0.833	0.615	0.818	0.75	0.692		864.37	682.091	735.444	225.704	190.995	457.949	433.19	668.003	810.25	650.842
Firmicutes	Clostridia	Clostridiales	Lachnospiraceae	sf_5	2961	77702	AB088989.1	termite gut homogenate clone Rs-F92 bacterium	1	1	1	0.92	0.92	0.92	0.98	0.96	0.92	0.981	0.962	0.981	0.92	0.94	0.918	0.918	0.939	0.918	1	0.961	0.98	0.959	0.917	0.94	1	0.981	0.94	0.962	1	1		4123.54	3502.42	3539.95	2726.03	2400.92	2658.47	3267.97	3224.36	2830.07	3106.46
Bacteroidetes	Bacteroidetes	Bacteroidales	Porphyromonadaceae	sf_1	5771	77581	AB074602.1	synonym: CFB group clone APe2_39	0.737	0.917	0.84	0.652	0.636	0.652	0.773	0.739	0.783	0.818	0.739	0.783	0.652	0.652	0.625	0.714	0.727	0.682	0.808	0.667	0.696	0.696	0.727	0.739	0.826	0.783	0.667	0.75	0.875	0.833		2513.36	1654.45	1855.43	1103.11	1117.88	1204.51	1633.49	1553.27	1490.97	1652.49
Proteobacteria	Deltaproteobacteria	Desulfuromonadales	Geobacteraceae	sf_1	10176	NA			0.7	0.545	0.778	0.4	0.5	0.5	0.636	0.727	0.444	0.727	0.9	0.833	0.5	0.3	0.273	0.5	0.364	0.25	1	0.909	0.667	0.5	0.4	0.455	1	0.909	0.833	1	1	0.917		881.615	530.728	525.447	432.843	415.694	547.172	624.716	543.699	567.265	427.851
Firmicutes	Bacilli	Bacillales	Bacillaceae	sf_1	3898	27234	AB034710.1	compost clone 4-28	0.857	1	0.867	0.857	1	0.933	0.857	0.929	0.8	1	0.933	0.8	0.8	0.923	0.833	0.857	0.857	0.846	0.933	0.867	0.867	0.733	0.929	0.857	0.933	0.929	0.8	0.867	0.867	0.867		1484.09	1324.9	1452.71	1177.37	969.579	1342.89	1036.85	1164.14	1024.65	1284.46
Proteobacteria	Alphaproteobacteria	Rickettsiales	Anaplasmataceae	sf_3	6908	6121	M85267.1	Rhinocyllus conicus endosymbiont	1	1	1	1	1	1	1	1	1	1	1	1	1	0.933	0.933	1	1	1	1	1	1	1	1	1	1	1	1	1	1	1		3606.21	2016.58	2840.87	3864.32	3837.87	3529.76	2134.86	2395.3	2314.62	2604.27
Firmicutes	Bacilli	Bacillales	Staphylococcaceae	sf_1	3569	14762	L37596.1	Staphylococcus saprophyticus	0.987	0.913	0.92	0.769	0.791	0.783	0.912	0.912	0.897	0.953	0.953	0.927	0.889	0.771	0.87	0.889	0.834	0.812	0.921	0.906	0.933	0.842	0.755	0.871	0.967	0.913	0.858	0.919	0.953	0.94		2707.35	2452.46	2106.33	2009.84	2122.29	2046.66	1859.11	1881.87	1834.9	1985.16
Proteobacteria	Betaproteobacteria	Neisseriales	Neisseriaceae	sf_1	8092	58031	AF487709.1	Neisseria dentiae str. V33	0.692	0.923	0.917	0.545	0.6	0.556	0.667	0.538	0.636	0.583	0.583	0.615	0.583	0.333	0.5	0.583	0.583	0.583	0.583	0.583	0.538	0.583	0.636	0.636	0.615	0.583	0.538	0.583	0.615	0.583		589.539	1815.4	1618.16	534.458	477.487	621.827	1086.98	949.04	828.117	1065.1
Firmicutes	Bacilli	Bacillales	Halobacillaceae	sf_1	3552	56418	AB087828.1	Paraliobacillus ryukyuensis	0.867	0.8	0.929	0.8	0.714	0.714	0.867	0.933	0.933	0.867	0.933	0.867	0.867	0.867	0.867	0.867	0.8	0.733	0.867	0.929	0.867	0.8	0.857	0.867	0.933	0.933	0.8	0.933	0.933	0.933		1328.89	1601.77	1503.61	1091.39	924.639	1039.72	808.219	933.908	1082.72	1108.61
Firmicutes	Bacilli	Lactobacillales	Unclassified	sf_1	3434	78015	AB089063.1	termite gut homogenate clone Rs-C68 sp.	0.833	1	0.857	0.667	0.636	0.727	0.786	0.786	0.692	0.929	0.786	0.857	0.692	0.615	0.75	0.786	0.692	0.714	1	0.857	0.929	0.769	0.714	0.643	1	0.846	0.786	1	1	1		2304.27	2165.07	1651.79	1075.76	1163.94	1473.08	1137.12	1235.48	986.237	1499.29
Actinobacteria	Actinobacteria	Actinomycetales	Corynebacteriaceae	sf_1	1272	13460	X89778.1	Corynebacterium sp. str. EL-68	0.68	0.75	0.84	0.72	0.75	0.84	0.75	0.72	0.833	0.72	0.692	0.75	0.92	0.731	0.75	0.72	0.75	0.68	0.72	0.72	0.615	0.75	0.72	0.708	0.75	0.84	0.654	0.72	0.88	0.808		1020.65	1147.68	796.352	661.477	551.638	658.245	1212.33	1024.7	1330.17	867.487
Firmicutes	Clostridia	Unclassified	Unclassified	sf_3	2373	NA			1	1	1	1	1	1	1	1	1	1	1	1	1	1	1	1	1	1	1	1	1	1	1	1	1	1	1	1	1	1		3080.26	2598.08	2939.96	2424.11	2381.82	2410.83	2353.46	2093.73	2210.99	2496.4
Bacteroidetes	Sphingobacteria	Sphingobacteriales	Flexibacteraceae	sf_19	5404	2426	M58769.2	Cytophaga latercula	0.75	0.917	0.917	0.917	0.833	0.917	0.917	0.917	1	1	1	1	0.923	1	0.75	0.583	0.667	0.583	0.917	0.75	0.75	0.75	0.583	0.667	1	1	0.75	0.846	0.923	1		906.403	1140.01	1285.44	1255.54	1157.2	1249.12	895.459	1004.17	1222.97	1000.74
Bacteroidetes	Bacteroidetes	Bacteroidales	Bacteroidaceae	sf_12	5320	1953	M86695.1	Bacteroides distasonis	1	1	1	1	0.9	0.9	1	1	1	1	1	1	1	0.909	0.818	0.818	0.909	0.909	1	1	1	1	1	1	1	0.909	1	1	1	1		3652.56	2577	3379.04	1907.24	2170.6	2305.22	2464.77	2330.45	2323.55	2181.86
Firmicutes	Bacilli	Bacillales	Paenibacillaceae	sf_1	3415	85675	AF480937.1	Paenibacillus nematophilus str. NEM1b	0.857	0.952	0.905	0.81	0.81	0.85	0.909	0.955	0.905	0.957	1	1	0.81	0.81	0.762	0.909	0.783	0.783	0.864	0.818	0.909	0.818	0.727	0.783	0.957	0.957	0.957	0.957	1	0.957		2208.35	2506.11	2372.69	1878.91	1803.21	2338	1765.85	1892.68	1851.87	2050.42
OP10	Unclassified	Unclassified	Unclassified	sf_4	484	63206	AF524022.1	forested wetland clone FW68	0.909	0.909	0.909	1	1	1	0.909	0.909	0.909	0.909	0.909	0.909	0.909	0.9	1	0.909	0.909	0.909	0.909	0.909	0.909	0.909	0.909	0.909	1	0.909	0.909	1	1	1		4012.53	3604.93	3169.95	2564.81	2657.07	3436.89	2330.4	2745.52	2612.1	2711.24
Proteobacteria	Gammaproteobacteria	Thiotrichales	Piscirickettsiaceae	sf_3	8595	81639	AB086228.1	sea water isolate str. DBF-MAK	0.7	0.889	0.875	1	0.818	1	0.727	0.8	0.8	0.8	0.8	0.8	0.7	0.7	0.7	0.8	0.556	0.8	0.818	0.8	0.8	0.636	0.625	0.7	0.9	0.889	0.636	0.818	1	1		2384.02	2666.1	2609.05	2335.2	2473.94	2145.9	2407.61	2301.26	1847.41	2351.37
Chlorobi	Unclassified	Unclassified	Unclassified	sf_6	5294	83562	AY221073.1	Mammoth cave clone CCM9b	0.9	0.818	0.818	1	1	0.909	1	1	1	1	1	1	1	1	1	0.909	0.909	0.909	0.909	0.909	0.909	0.909	0.909	0.909	0.909	0.909	0.909	0.909	1	0.909		2443.3	2771.48	3112.68	2986.91	2952.55	2622.05	2962.13	2263.43	2432.54	2994.05
Firmicutes	Bacilli	Bacillales	Bacillaceae	sf_1	3827	71698	AF547209.1	Bacillus acidogenesis str. 105-2	1	0.914	0.909	0.667	0.704	0.714	0.97	0.97	1	1	1	0.971	0.939	0.677	0.909	1	0.969	0.781	1	0.906	1	0.875	0.677	0.879	1	0.939	0.97	0.939	0.97	0.939		1493.79	1700.44	1422.71	941.897	1023.51	1108	701.928	842.03	965.69	1162.99
Cyanobacteria	Cyanobacteria	Planktothricoides	Unclassified	sf_1	5178	58439	AB045960.1	Planktothricoides raciborskii str. NIES 207	0.75	0.769	0.643	0.714	0.714	0.714	0.706	0.8	0.812	0.75	0.75	0.8	0.667	0.714	0.714	0.714	0.714	0.714	0.714	0.643	0.714	0.714	0.769	0.786	0.923	0.786	0.733	0.857	0.857	0.857		2349.54	2248.41	2186.33	1602.4	1670.64	2026.63	1331.66	1609.48	1716.98	1469.38
Actinobacteria	Actinobacteria	Actinomycetales	Microbacteriaceae	sf_1	1548	12231	AB002637.1	deepest sea mud Mariana Trench clone	0.5	0.667	0.591	0.773	0.682	0.81	0.727	0.773	0.857	0.727	0.773	0.81	0.818	0.773	0.783	0.714	0.81	0.714	0.636	0.55	0.545	0.9	0.611	0.8	0.833	0.739	0.591	0.696	0.957	0.913		603.55	422.475	537.265	642.913	475.24	689.2	396.088	511.271	928.17	451.42
Firmicutes	Mollicutes	Acholeplasmatales	Acholeplasmataceae	sf_1	3976	NA			0.955	1	0.952	0.905	0.905	0.905	0.955	1	0.909	0.955	0.955	1	1	0.864	0.952	0.955	0.955	0.955	1	0.955	1	1	0.905	1	0.955	0.955	1	1	1	1		2683.64	2891.22	2696.32	2142.72	2155.99	2055.76	2241.15	2158.58	1882.25	2187.3
Chlorobi	Unclassified	Unclassified	Unclassified	sf_8	5822	98997	AJ428454.1	Saltmarsh mud clone K-790	0.8	0.867	0.933	0.867	0.867	0.867	0.933	0.933	0.867	0.933	0.933	0.867	0.933	0.867	0.929	0.867	0.933	0.867	0.933	0.933	0.933	0.867	0.933	0.933	0.933	0.933	0.933	0.933	0.933	0.933		4051.33	3281.13	3069.05	2789.54	2922.22	3064.53	3042.35	2756.32	3174.9	2726.65
Firmicutes	Bacilli	Lactobacillales	Streptococcaceae	sf_1	3753	20126	AF009482.1	Streptococcus suis str. 8074	1	1	1	0.955	0.955	0.909	0.955	1	1	1	1	1	0.952	0.952	0.952	1	0.955	0.955	1	1	1	0.955	0.955	1	1	1	1	1	1	1		3397.13	3960.34	3682.67	3294.69	3524.41	2828.72	3226.86	2906.57	2687.14	3063.85
Firmicutes	Bacilli	Bacillales	Bacillaceae	sf_1	3926	26101	X92160.1	Lake Bogoria isolate 64B4	0.875	0.857	0.818	0.762	0.842	0.8	0.783	0.727	0.81	0.864	0.87	0.864	0.708	0.708	0.773	0.826	0.762	0.727	0.957	0.909	0.909	0.739	0.762	0.783	0.913	0.773	0.667	0.875	0.792	0.826		1187.7	1579.73	1035.44	1199.84	1334.72	1406.62	998.743	946.879	1042.52	939.098
Bacteroidetes	Sphingobacteria	Sphingobacteriales	Unclassified	sf_3	5799	60633	AF406540.1	bacterioplankton clone AEGEAN_150	0.714	0.615	0.692	0.846	0.692	0.786	0.846	0.833	0.923	0.833	0.833	0.917	0.923	0.769	0.846	0.75	0.75	0.75	0.667	0.615	0.615	0.833	0.75	0.833	0.917	0.833	0.75	0.769	0.833	0.833		2304.27	1793.36	1992.7	1572.11	1530.2	1377.49	2254.19	2277.48	1927.81	2348.65
Cyanobacteria	Unclassified	Unclassified	Unclassified	sf_5	5027	NA			1	0.963	0.893	0.929	0.963	0.929	1	1	0.964	1	1	0.964	0.964	0.929	0.964	0.929	0.929	0.964	0.964	0.929	1	0.929	0.926	1	1	0.964	0.964	0.964	1	0.964		2759.09	2505.15	1988.15	2514.01	2668.31	2506.43	2449.73	2253.7	2204.74	2387.63
Proteobacteria	Gammaproteobacteria	Xanthomonadales	Xanthomonadaceae	sf_3	8847	7772	AJ001343.1	Nevskia ramosa	0.364	0.333	0.5	0.364	0.364	0.364	0.462	0.667	0.333	0.923	0.923	1	0.364	0.364	0.308	0.417	0.417	0.5	0.308	0.333	0.462	0.308	0.364	0.417	0.917	1	0.5	0.667	0.917	0.667		719.949	444.509	609.082	422.095	428.053	671.901	286.788	415.07	420.759	475.894
Firmicutes	Mollicutes	Anaeroplasmatales	Erysipelotrichaceae	sf_3	3943	74862	AB030218.1	Coprobacillus cateniformis str. JCM 10603	0.935	0.968	0.903	0.903	0.9	0.931	0.844	0.871	0.871	0.935	0.903	0.875	0.968	0.871	0.871	0.871	0.871	0.903	0.839	0.812	0.844	0.871	0.871	0.844	0.969	0.903	0.844	0.844	0.968	0.871		3175.11	2610.53	3326.32	3231.18	3535.65	3223.85	2495.85	2334.77	2431.64	2785.57
Firmicutes	Clostridia	Clostridiales	Clostridiaceae	sf_12	4300	82058	AB100493.1	termite gut clone Rs-060	0.968	0.968	1	1	0.968	0.968	1	1	1	1	1	1	1	1	0.968	1	1	1	1	1	1	1	1	1	1	1	1	1	1	1		4327.24	3693.06	3700.86	2632.23	2714.37	2503.7	3247.92	3237.33	2813.1	3212.51
Proteobacteria	Alphaproteobacteria	Unclassified	Unclassified	sf_6	7252	60656	AF406516.1	bacterioplankton clone AEGEAN_108	0.857	0.857	0.733	1	1	1	0.857	0.929	0.875	0.8	0.929	0.933	0.938	0.875	0.938	0.8	0.8	0.812	0.8	0.8	0.8	0.857	0.8	0.75	1	0.933	0.8	0.933	0.875	1		2558.62	1468.6	1391.8	2358.65	2360.47	2691.25	1409.87	1620.29	1480.25	1751.29
Firmicutes	Mollicutes	Acholeplasmatales	Acholeplasmataceae	sf_1	3975	38649	AF302841.1	Black raspberry witches'-broom phytoplasma str. BRWB witches'-broom	0.964	0.963	0.962	0.852	0.889	0.852	0.926	1	0.926	0.963	0.963	1	1	0.889	0.923	0.926	0.926	0.926	1	0.929	0.929	0.963	0.885	0.963	0.929	0.926	0.926	0.963	0.963	0.963		2804.35	2847.16	3057.23	2542.34	2488.55	2336.18	2589.11	2452.59	2185.98	2568.02
Firmicutes	Clostridia	Clostridiales	Clostridiaceae	sf_12	4497	77671	AB089033.1	termite gut homogenate clone Rs-N16 bacterium	0.882	0.882	0.941	0.882	0.882	0.882	1	0.941	0.941	0.941	1	0.941	1	0.941	0.941	1	1	1	1	1	1	1	1	0.941	0.941	0.941	1	0.941	0.941	0.941		2837.76	2511.86	2347.24	1275.08	1301.01	1535.9	2083.72	1913.21	1880.46	2083.96
Firmicutes	Bacilli	Lactobacillales	Aerococcaceae	sf_1	3736	15266	Y14650.1	Desemzia incerta str. DSM 20581	0.789	0.842	0.789	0.905	0.952	0.952	0.737	0.737	0.842	0.9	0.895	0.842	0.842	0.789	0.667	0.842	0.789	0.632	0.9	0.789	0.737	0.8	0.789	0.842	0.952	0.895	0.684	0.842	0.95	0.895		940.892	771.185	904.532	888.158	1023.51	1259.13	588.616	525.323	739.677	702.51
Bacteroidetes	Flavobacteria	Flavobacteriales	Flavobacteriaceae	sf_1	5352	111656	AY871820.2	Riemerella anatipestifer str. H-2565	0.909	0.909	0.909	0.909	0.909	0.909	1	0.909	0.909	0.909	0.909	0.909	1	0.909	0.909	0.909	0.909	0.909	0.909	0.909	1	0.909	1	0.909	0.909	0.909	0.909	0.909	0.909	0.909		3107.21	3729.47	4423.57	4772.02	4615.33	3725.5	4460.25	3561.6	3299.96	3923.18
Bacteroidetes	Flavobacteria	Flavobacteriales	Flavobacteriaceae	sf_1	5671	NA			0.833	0.833	0.833	1	1	1	0.909	0.909	0.909	0.833	0.833	0.833	1	0.909	0.909	0.833	0.833	0.833	0.818	0.75	0.75	0.833	0.917	0.833	0.833	0.833	0.833	0.833	0.833	0.833		2539.22	2135.37	2396.33	3177.44	3171.64	3092.75	2742.53	2612.56	3181.15	2263.44
Bacteroidetes	Bacteroidetes	Bacteroidales	Bacteroidaceae	sf_12	5275	108417	AY570561.1	biodegraded Canadian oil reservoir clone PL-26B10	0.933	1	1	0.571	0.667	0.667	1	1	0.938	1	1	1	0.875	0.5	0.571	0.625	0.75	0.533	1	1	1	0.938	0.812	1	1	1	1	1	1	1		2419.59	2142.07	3561.77	1243.81	1539.19	1085.24	1676.6	1621.37	1036.26	1639.79
Bacteroidetes	Bacteroidetes	Bacteroidales	Unclassified	sf_15	5998	84869	AY244963.1	cow rumen clone BS9	0.889	0.9	0.778	0.875	0.875	1	0.636	0.7	1	0.9	0.9	1	0.875	1	0.7	0.778	0.778	0.636	0.727	0.778	0.636	0.7	0.7	0.8	1	0.889	0.636	0.7	0.889	0.889		2849.62	2327.92	2871.78	2713.33	2752.57	3708.2	2025.56	1944.56	3398.23	1961.59
Firmicutes	Bacilli	Bacillales	Halobacillaceae	sf_1	3633	55141	AY152839.1	Bacillus clausii str. GMBAE 42	0.909	0.818	0.75	1	1	0.917	1	1	1	1	1	1	0.917	1	1	1	1	1	1	0.917	0.917	1	0.667	0.917	1	1	1	1	1	1		1308.41	2520.48	1566.34	681.996	796.56	798.452	878.412	877.7	911.197	1124.02
Bacteroidetes	Sphingobacteria	Sphingobacteriales	Sphingobacteriaceae	sf_1	6136	31688	AJ318186.1	Waste-gas biofilter clone BIti3	0.273	0.667	0.818	0.5	0.455	0.273	0.846	0.769	0.833	0.692	0.75	0.917	0.75	0.692	0.75	0.636	0.583	0.5	0.615	0.75	0.538	0.538	0.8	0.667	0.917	0.917	0.615	0.538	0.833	0.846		64.6661	395.651	714.535	140.698	178.636	209.4	380.044	423.717	1093.44	300.04
Firmicutes	Bacilli	Bacillales	Bacillaceae	sf_1	3542	22739	AJ277984.1	Bacillus psychrodurans str. DSM 11713 68E3	0.824	0.848	0.848	0.742	0.806	0.774	0.853	0.829	0.912	0.857	0.882	0.853	0.771	0.788	0.941	0.853	0.844	0.765	0.912	0.853	0.882	0.818	0.806	0.818	0.912	0.879	0.765	0.829	0.882	0.857		1497.02	1862.34	1834.52	1503.71	1395.38	1560.49	1405.86	1310.06	1466.85	1592.66
Actinobacteria	Actinobacteria	Acidimicrobiales	Acidimicrobiaceae	sf_1	1211	56590	AF523911.1	forested wetland clone RCP1-34	0.75	0.944	1	0.706	0.765	0.875	0.778	0.833	0.882	0.889	0.889	0.947	0.706	0.556	0.722	0.647	0.778	0.765	0.842	0.647	0.579	0.778	0.647	0.667	0.842	0.889	0.722	0.889	0.947	0.944		2178.17	1869.05	1730.88	2029.38	2394.17	2185.04	1782.9	1678.66	1651.77	1599
Proteobacteria	Gammaproteobacteria	Thiotrichales	Thiotrichaceae	sf_3	9321	84651	AB108786.1	marine sediment clone Tokyo Bay D	1	1	0.957	0.913	0.864	0.957	1	0.957	1	1	1	1	1	0.87	0.818	1	1	0.955	1	1	1	1	0.739	0.957	1	1	1	1	1	1		3208.52	2624.9	2489.96	2113.41	2198.69	2246.95	2011.52	1966.18	1803.63	2218.12
Firmicutes	Clostridia	Clostridiales	Clostridiaceae	sf_12	4554	81528	AB100479.1	termite gut clone Rs-068	0.926	1	1	0.889	0.852	0.889	1	1	0.963	1	1	1	1	0.852	0.96	0.963	1	0.926	1	0.963	1	1	0.962	1	1	1	0.963	1	1	1		3761.41	3509.13	3106.32	2875.52	2728.98	2583.82	2841.8	2957.37	2381.62	2904.31
Proteobacteria	Gammaproteobacteria	Enterobacteriales	Enterobacteriaceae	sf_6	8783	9675	AF075271.2	Alterococcus agarolyticus str. ADT3; CCRC17102	0.96	0.952	0.968	0.891	0.741	0.786	0.976	0.968	0.968	0.96	0.976	0.968	0.984	0.944	0.96	0.984	0.935	0.888	0.984	0.968	0.992	0.968	0.895	0.984	0.96	0.992	0.968	0.984	0.992	1		4577.28	3143.18	1783.61	1224.27	1160.57	1192.67	1893.2	2111.02	1615.14	2105.72
Proteobacteria	Betaproteobacteria	Burkholderiales	Unclassified	sf_1	7879	NA			1	1	0.917	1	0.9	0.818	1	1	0.917	1	1	0.846	1	0.917	1	0.917	1	1	0.769	0.833	0.923	1	0.917	1	1	0.917	0.917	1	0.833	0.833		1887.17	1234.85	1829.97	1763.61	1970.62	1620.57	1132.11	1431.13	1566.01	1367.86
Cyanobacteria	Cyanobacteria	Pseudanabaena	Unclassified	sf_1	5223	95607	AJ580007.1	Limnothrix redekei str. CCAP 1443/1	0.75	0.75	0.7	0.75	0.75	0.833	0.538	0.833	0.75	0.75	0.75	0.667	0.833	0.75	0.583	0.692	0.75	0.692	0.667	0.692	0.769	0.846	0.692	1	0.75	0.917	0.692	0.75	0.917	0.833		531.34	460.795	369.086	319.502	165.154	280.414	280.771	311.303	407.359	235.681
Bacteroidetes	Bacteroidetes	Bacteroidales	Unclassified	sf_15	5957	57464	AJ441217.1	hydrothermal vent polychaete mucous clone P. palm C/A 20	0.923	0.923	0.923	1	1	1	1	1	1	1	1	1	1	1	1	1	1	1	1	1	1	1	1	1	1	1	1	1	1	1		3594.36	2946.79	3159.05	3395.32	3246.91	2988.96	3302.07	3678.34	3209.74	3261.46
Proteobacteria	Betaproteobacteria	Neisseriales	Neisseriaceae	sf_1	8143	42684	AY005029.1	subgingival dental plaque clone AK105	0.455	0.909	0.909	0.444	0.5	0.3	0.727	0.727	0.8	0.818	0.909	0.727	0.5	0.333	0.444	0.8	0.667	0.455	0.9	0.818	0.818	0.818	0.5	0.583	0.75	0.818	0.75	0.833	0.75	0.833		114.243	515.4	836.352	68.395	76.3979	119.267	178.49	229.153	242.092	332.673
Actinobacteria	Actinobacteria	Actinomycetales	Actinomycetaceae	sf_1	1368	17127	AJ243893.1	Actinomyces urogenitalis	0.636	0.727	0.778	1	1	1	0.889	0.778	0.7	0.778	0.778	0.778	0.778	0.778	0.778	0.875	0.889	0.8	0.667	0.667	0.7	0.889	0.889	0.889	0.727	0.889	0.7	0.7	0.9	0.8		1295.48	1383.34	2093.61	2128.06	2524.5	2311.6	1334.67	1127.39	1192.6	1611.69
Firmicutes	Clostridia	Clostridiales	Clostridiaceae	sf_12	2816	82089	AY217423.1	TCE-dechlorinating microbial community clone 4C	0.923	0.906	0.865	0.808	0.812	0.896	0.882	0.902	0.885	0.904	0.902	0.906	0.882	0.82	0.865	0.88	0.837	0.896	0.906	0.939	0.941	0.918	0.857	0.918	0.906	0.9	0.843	0.902	0.904	0.902		3165.41	2711.12	2769.05	1877.93	2188.57	2064.87	2179.99	2268.83	1834.9	2379.47
Chloroflexi	Dehalococcoidetes	Unclassified	Unclassified	sf_1	2339	77206	AJ519643.1	uranium mill tailings soil sample clone Sh765B-TzT-20 bacterium	0.909	1	0.917	0.909	0.909	1	1	0.923	0.917	1	0.923	0.923	0.917	0.909	0.917	0.917	1	0.917	1	1	1	1	0.833	1	1	0.923	1	0.923	0.923	0.923		3516.76	2942.96	3170.86	2221.86	2106.56	2296.12	2766.6	2237.49	2277.99	2567.11
Firmicutes	Bacilli	Bacillales	Staphylococcaceae	sf_1	3605	NA			0.991	0.93	0.904	0.789	0.798	0.802	0.912	0.939	0.938	0.965	0.982	0.939	0.938	0.82	0.921	0.903	0.857	0.839	0.957	0.937	0.947	0.876	0.778	0.912	0.991	0.921	0.885	0.903	0.965	0.956		2247.15	2145.91	1727.25	1795.86	1886.35	1863.66	1587.36	1572.73	1630.33	1661.55
Firmicutes	Bacilli	Lactobacillales	Lactobacillaceae	sf_1	3547	35658	AJ250074.1	Lactobacillus frumenti str. TMW 1.666	1	1	0.974	0.921	0.868	0.921	0.85	0.923	0.974	1	1	0.95	0.974	0.821	0.825	0.974	0.825	0.718	0.976	0.923	0.952	0.795	0.9	0.725	1	0.897	0.769	0.95	0.975	0.975		2566.17	2509.94	2317.24	2047.94	1894.22	2012.97	2138.87	2040.76	2107.37	2169.17
Proteobacteria	Gammaproteobacteria	Enterobacteriales	Enterobacteriaceae	sf_1	9337	10315	U90758.1	Rahnella genosp. 3 str. DSM 30078	0.75	1	1	0.727	0.636	0.667	1	1	1	1	1	1	1	1	0.917	0.917	0.917	1	1	1	1	0.917	0.917	1	1	1	1	1	1	1		2176.01	2413.19	1469.07	1153.92	1150.46	1294.64	1260.46	1484.09	1434.69	1445.81
Proteobacteria	Gammaproteobacteria	Xanthomonadales	Xanthomonadaceae	sf_3	8682	7885	AB021391.1	Pseudomonas boreopolis str. ATCC 33662T	0.636	0.857	0.786	0.714	0.643	0.643	0.786	0.714	0.714	0.714	0.714	0.714	0.714	0.643	0.571	0.462	0.615	0.615	0.929	0.929	0.857	0.538	0.462	0.538	0.929	0.929	0.929	0.786	0.857	0.857		783.538	849.74	709.99	452.384	375.248	477.068	420.154	505.867	513.665	512.153
Firmicutes	Bacilli	Lactobacillales	Lactobacillaceae	sf_1	3490	105631	AY675248.1	Lactobacillus suntoryeus str. LH	0.893	0.931	0.897	0.889	0.846	0.846	0.862	0.862	0.923	0.897	0.931	0.966	0.893	0.815	0.828	1	0.852	0.857	0.931	0.963	0.931	0.828	0.852	0.893	0.931	0.862	0.857	0.897	0.931	0.929		2752.62	3012.89	2486.33	2727.98	2500.91	2211.45	2596.13	2568.25	2522.76	2316.02
Firmicutes	Bacilli	Bacillales	Staphylococcaceae	sf_1	3684	14880	S83569.1	Staphylococcus sciuri	0.989	0.944	0.944	0.859	0.892	0.859	0.919	0.919	0.919	0.955	0.966	0.944	0.907	0.882	0.895	0.882	0.871	0.833	0.978	0.943	0.989	0.918	0.845	0.884	1	0.943	0.884	0.932	0.989	0.977		3268.87	2754.23	2518.15	2558.95	2693.03	2513.71	2493.85	2435.29	2311.94	2443.83
Firmicutes	Clostridia	Clostridiales	Clostridiaceae	sf_12	4459	81634	AB100469.1	termite gut clone Rs-109	0.978	1	1	0.844	0.837	0.933	0.978	1	1	1	1	1	0.956	0.841	0.778	0.978	0.956	0.913	0.957	1	0.978	1	0.867	0.936	0.979	1	0.936	1	1	1		2934.76	2748.48	2430.87	1545.73	1492.01	1764.42	2172.97	2401.79	1887.61	2362.25
Chloroflexi	Anaerolineae	Unclassified	Unclassified	sf_9	72	83926	AY221035.1	sediments collected at Charon's Cascade near Echo River October 2000 clone CCD21	0.909	0.909	0.909	0.909	0.909	0.909	0.909	0.833	0.909	0.917	0.917	0.833	0.909	0.909	0.909	0.909	0.909	0.909	0.909	0.909	0.909	0.909	0.909	0.909	0.917	0.833	0.909	0.917	1	0.917		2751.54	2669.93	3103.59	2483.72	2351.48	2917.03	2588.11	2517.44	2717.51	2788.29
Firmicutes	Clostridia	Clostridiales	Clostridiaceae	sf_12	4173	78088	AB089020.1	termite gut homogenate clone Rs-D81 bacterium	0.909	1	0.909	0.818	0.9	0.9	0.818	0.818	0.818	0.818	0.818	0.909	0.9	0.727	0.9	0.818	0.818	0.727	0.909	0.818	0.909	0.818	0.727	0.818	0.818	0.818	0.818	0.818	0.818	0.909		3526.46	3152.76	3142.68	3290.78	3791.81	2834.19	3109.54	2830.91	2651.4	2568.02
Bacteroidetes	Bacteroidetes	Bacteroidales	Rikenellaceae	sf_5	5356	77203	AJ519404.1	uranium mining waste pile clone JG37-AG-150 sp.	0.818	1	0.9	1	0.8	0.818	0.909	0.909	1	1	1	1	0.9	1	1	1	1	0.909	1	0.909	0.909	1	0.909	0.909	0.909	0.909	1	0.909	1	0.909		2118.89	2307.81	2509.05	2373.31	1999.83	1904.63	2193.02	2212.63	2802.38	2197.27
Proteobacteria	Deltaproteobacteria	Myxococcales	Polyangiaceae	sf_3	9716	85080	AB097590.1	Enhygromyxa salina str. SHK-1	0.941	0.75	0.941	0.75	0.882	0.882	0.762	0.762	0.8	0.81	0.762	0.81	0.842	0.833	0.727	0.842	0.8	0.762	0.762	0.944	0.8	0.8	0.889	0.762	0.818	0.85	0.773	0.81	0.952	0.857		2805.43	2652.68	2952.68	2624.41	3179.5	2978.03	2381.54	2185.6	2255.66	2333.24
Firmicutes	Clostridia	Clostridiales	Peptostreptococcaceae	sf_5	393	85470	AF542229.1	Anaerococcus vaginalis str. CCUG 31349	0.955	0.955	0.955	1	1	1	0.955	0.955	1	0.955	0.955	0.955	0.952	0.952	1	0.909	0.909	0.952	0.955	1	1	1	0.952	1	0.955	1	0.955	0.955	0.955	0.955		3336.77	2917.09	2813.6	2710.4	2959.29	2949.81	2449.73	2518.52	2482.56	2533.57
Firmicutes	Bacilli	Bacillales	Staphylococcaceae	sf_1	3822	21472	AJ320272.1	Staphylococcus succinus str. SB72	0.988	0.928	0.904	0.776	0.787	0.786	0.902	0.921	0.903	0.958	0.952	0.934	0.902	0.785	0.89	0.876	0.845	0.82	0.947	0.908	0.927	0.864	0.771	0.877	0.97	0.916	0.86	0.892	0.945	0.934		2650.23	2447.67	2136.33	2088	2198.69	2111.3	1946.34	1974.83	1932.27	2058.58
Proteobacteria	Gammaproteobacteria	Enterobacteriales	Enterobacteriaceae	sf_1	9358	9715	U92194.1	Salmonella subsp. enterica serovar Waycross str. Swy1 subsp.	0.965	0.977	1	0.857	0.776	0.818	0.976	0.977	1	0.977	0.988	0.977	1	0.953	0.953	1	0.929	0.894	1	1	1	0.988	0.929	0.988	0.988	1	1	1	1	1		4503.99	3152.76	2162.7	1965.87	2145.88	1915.56	2237.14	2387.73	1808.1	2466.49
Firmicutes	Bacilli	Bacillales	Paenibacillaceae	sf_1	3922	17491	AJ320490.1	Paenibacillus thiaminolyticus str. DSM 7262	0.846	0.95	0.875	0.711	0.658	0.757	0.825	0.875	0.921	0.951	0.952	0.975	0.872	0.692	0.763	0.85	0.795	0.7	0.829	0.8	0.9	0.775	0.711	0.8	0.929	0.949	0.925	0.974	0.975	0.927		2284.87	2172.73	1956.34	1716.71	1730.19	1835.44	1377.78	1624.61	1579.41	1805.68
Proteobacteria	Gammaproteobacteria	Legionellales	Legionellaceae	sf_1	9612	7906	X73405.1	Fluoribacter dumoffii str. ATCC 33279	0.5	0.333	0.286	0.875	0.812	0.938	0.778	0.778	0.706	0.944	0.944	0.944	0.812	0.765	0.571	0.8	0.647	0.471	0.833	0.765	0.778	0.611	0.5	0.5	0.944	0.824	0.667	0.889	0.889	0.842		885.926	427.265	559.083	493.421	679.716	934.107	340.936	301.574	635.158	589.202
Firmicutes	Clostridia	Clostridiales	Peptostreptococcaceae	sf_5	268	35017	AF358114.2	Sporanaerobacter acetigenes str. Lup33; DSM 13106	0.872	0.897	0.872	0.795	0.816	0.846	0.825	0.829	0.921	0.854	0.857	0.857	0.825	0.78	0.762	0.872	0.825	0.846	0.857	0.85	0.81	0.805	0.816	0.821	0.925	0.947	0.825	0.881	0.925	0.9		2477.79	2723.58	2514.51	2497.4	2598.65	2132.24	2304.33	2090.48	2015.35	2165.54
Firmicutes	Mollicutes	Unclassified	Unclassified	sf_6	196	15736	M59230.1	biforme str. ATCC 27806	0.976	1	1	0.743	0.844	0.788	0.771	0.794	0.794	0.794	0.824	0.75	0.765	0.818	0.743	0.818	0.778	0.703	0.711	0.737	0.73	0.794	0.848	0.75	0.75	0.8	0.771	0.8	0.778	0.829		2469.17	2493.66	2524.51	2041.1	2188.57	2252.42	2314.36	2179.12	2218.14	2521.79
Firmicutes	Mollicutes	Acholeplasmatales	Acholeplasmataceae	sf_1	3961	15644	L33766.1	Clover yellow edge mycoplasma-like organism	0.933	0.966	0.929	0.862	0.897	0.828	0.931	1	0.931	0.966	0.966	1	1	0.897	0.929	0.931	0.931	0.931	1	0.933	0.933	0.966	0.893	0.966	0.933	0.931	0.931	0.966	0.966	0.966		2722.44	2759.98	2914.5	2518.89	2462.71	2282.46	2546.99	2411.51	2135.95	2545.35
Proteobacteria	Betaproteobacteria	Burkholderiales	Alcaligenaceae	sf_1	7768	38105	AF371864.1	swine intestine clone p-861-a5	0.98	0.922	0.981	0.98	0.94	0.882	0.922	0.923	0.962	0.923	0.981	0.942	0.962	0.961	0.94	0.941	0.961	0.941	0.922	0.98	0.961	0.941	0.941	0.961	0.942	0.922	0.941	0.962	0.981	0.981		3239.77	2215.84	2769.05	1911.15	1658.28	1769.89	2353.46	2489.34	2162.75	2541.73
Fusobacteria	Fusobacteria	Fusobacterales	Fusobacteriaceae	sf_3	644	31785	AJ307981.1	Ilyobacter polytropus str. DSM 2926 T	0.905	0.81	0.905	0.619	0.571	0.667	0.75	0.714	0.714	0.762	0.762	0.81	0.722	0.611	0.632	0.75	0.714	0.619	0.81	0.81	0.762	0.714	0.571	0.714	0.81	0.762	0.714	0.762	0.81	0.762		1657.61	1327.78	1569.98	1178.35	1284.16	1262.77	1144.14	1086.32	1074.68	1253.64
Proteobacteria	Gammaproteobacteria	Enterobacteriales	Enterobacteriaceae	sf_1	8640	NA			1	1	1	0.875	0.733	0.667	1	1	1	1	1	1	1	0.875	0.875	1	0.867	0.875	1	1	1	0.938	0.875	0.938	1	1	1	1	1	1		4275.51	2838.53	1666.34	861.777	661.74	865.824	1828.02	2111.02	1399.85	2300.61
Cyanobacteria	Cyanobacteria	Nostocales	Unclassified	sf_1	5174	60834	AF516731.1	Cylindrospermopsis raciborskii str. 23B	0.949	0.925	0.925	0.975	0.975	0.975	1	1	0.975	1	0.975	1	0.975	0.975	0.975	0.875	0.925	0.925	0.875	0.825	0.875	0.925	0.868	0.925	1	0.925	0.925	0.975	1	0.975		1943.22	1999.33	1761.79	2108.52	2126.78	2191.42	2076.7	1850.52	1924.23	2135.63
Firmicutes	Bacilli	Bacillales	Bacillaceae	sf_1	1050	109926	AJ717384.1	Bacillus firmus CV93b	0.923	0.889	0.863	0.51	0.457	0.581	0.943	0.942	0.885	0.981	0.943	0.963	0.887	0.532	0.868	0.943	0.904	0.75	0.982	0.824	0.909	0.788	0.469	0.849	0.981	0.962	0.774	0.981	0.943	0.962		865.448	1515.55	1319.07	623.372	640.394	806.646	479.316	617.201	650.344	857.516
Firmicutes	Bacilli	Bacillales	Staphylococcaceae	sf_1	3494	61797	AB079788.1	Micrococcus luteus B-P 26	0.982	0.866	0.901	0.762	0.798	0.824	0.907	0.897	0.886	0.928	0.936	0.945	0.846	0.794	0.808	0.849	0.857	0.794	0.91	0.907	0.91	0.822	0.712	0.844	0.981	0.909	0.861	0.9	0.936	0.937		2892.73	2450.55	2349.97	2220.88	2371.7	2079.43	2078.71	2039.68	2023.39	2035.92
Proteobacteria	Betaproteobacteria	Burkholderiales	Comamonadaceae	sf_1	8051	NA			0.353	0.857	0.857	0.5	0.467	0.6	0.842	0.85	0.714	0.9	0.905	1	0.684	0.667	0.727	0.864	0.762	0.762	0.955	0.857	0.95	0.682	0.684	0.714	0.909	0.905	0.8	0.895	0.905	0.75		541.04	1615.18	1203.62	502.215	467.375	635.484	908.495	922.018	988.917	794.97
Firmicutes	Bacilli	Lactobacillales	Lactobacillaceae	sf_1	3395	15144	X76328.1	Lactobacillus reuteri str. DSM 20016 T	0.881	0.929	0.902	0.825	0.8	0.825	0.773	0.837	0.878	0.953	0.953	0.86	0.881	0.786	0.714	0.953	0.786	0.585	0.911	0.833	0.977	0.738	0.81	0.595	0.932	0.833	0.634	0.86	0.905	0.881		2090.87	2052.98	1920.88	1599.47	1448.19	1563.22	1698.66	1647.31	1691.07	1743.13
Firmicutes	Bacilli	Lactobacillales	Enterococcaceae	sf_1	3288	76127	AY167946.1	Isolation and identification hyper-ammonia producing swine storage pits manure	1	1	1	0.846	0.846	0.923	0.929	1	0.929	1	1	1	0.929	0.769	0.929	1	0.923	0.857	1	0.929	1	0.786	0.923	0.929	1	1	0.929	1	1	1		2533.83	3112.52	3149.05	3196	3040.19	2671.22	2665.32	2409.35	2202.95	2515.44
Firmicutes	Bacilli	Lactobacillales	Streptococcaceae	sf_1	3422	15434	X68418.1	Streptococcus thermophilus str. DSM 20617	1	1	1	1	0.929	0.929	1	1	1	1	1	1	1	1	1	1	1	1	1	1	1	1	0.929	1	1	1	1	1	1	1		3008.05	3651.87	3660.86	3167.67	3321.06	2490.04	3127.59	2905.49	2642.47	2738.43
Firmicutes	Clostridia	Clostridiales	Peptococc/Acidaminococc	sf_11	304	13812	AB003379.1	Selenomonas ruminantium str.JCM6582	0.982	0.982	0.964	0.889	0.824	0.962	0.981	0.964	0.963	0.982	0.982	0.981	0.963	0.818	0.83	0.981	0.927	0.944	0.982	0.945	0.964	0.963	0.873	0.946	0.982	0.982	0.964	0.964	0.964	0.964		3539.39	3177.66	3008.14	2570.68	2885.14	2347.1	2576.07	2491.5	2175.26	2563.48
WS3	Unclassified	Unclassified	Unclassified	sf_3	95	78123	AJ535231.1	marine sediment above hydrate ridge clone Hyd24-32	1	1	1	0.929	1	1	0.929	1	1	0.929	1	1	0.929	1	0.929	1	1	1	0.929	1	1	1	0.923	1	0.929	1	0.929	1	1	1		3032.84	2575.09	2568.14	2408.48	2711	2772.28	2334.41	2533.66	2424.5	2398.51
Firmicutes	Bacilli	Lactobacillales	Aerococcaceae	sf_1	3522	15066	M58797.1	Aerococcus viridans	0.897	0.897	0.862	0.828	0.923	0.923	0.903	0.871	0.929	1	0.935	0.839	0.897	0.897	0.897	0.867	0.839	0.774	0.968	0.839	0.839	0.897	0.929	0.839	0.929	0.929	0.929	0.929	0.929	0.893		3445.63	3096.23	2472.69	2302.96	2779.53	2699.44	2139.88	2410.43	1954.61	2537.2
Proteobacteria	Gammaproteobacteria	Enterobacteriales	Enterobacteriaceae	sf_1	8742	9665	AF084835.1	USA:New York isolate str. KN4	0.972	0.977	0.977	0.882	0.821	0.819	0.989	0.983	0.977	0.983	0.989	0.983	0.989	0.983	0.983	0.989	0.96	0.96	0.989	0.977	1	0.989	0.954	0.994	0.977	0.994	0.977	0.994	0.994	1		4686.14	3227.48	1938.15	1537.91	1540.32	1450.32	2118.82	2272.08	1868.85	2374.03
Firmicutes	Mollicutes	Acholeplasmatales	Acholeplasmataceae	sf_1	4045	58989	AY081817.1	Chinaberry yellows phytoplasma	0.938	1	0.933	0.933	0.933	0.933	0.938	1	0.875	0.938	0.938	1	1	0.812	0.933	0.938	0.938	0.938	1	0.938	1	1	0.867	1	0.938	0.938	1	1	1	1		2499.35	2809.79	2607.23	2445.61	2417.77	2114.94	2170.96	2227.76	1808.99	2186.39
Firmicutes	Bacilli	Lactobacillales	Lactobacillaceae	sf_1	3696	84126	AY253657.1	Lactobacillus kalixensis str. Kx127A2; LMG 22115T; DSM 16043T; CCUG 48459T	0.9	0.951	0.881	0.875	0.846	0.892	0.878	0.878	0.897	0.902	0.905	0.951	0.878	0.846	0.833	0.93	0.85	0.854	0.929	0.925	0.929	0.854	0.85	0.878	0.951	0.878	0.833	0.881	0.884	0.881		2750.47	2835.66	2366.33	2686.95	2603.15	2427.22	2664.32	2543.39	2495.96	2458.33
Proteobacteria	Alphaproteobacteria	Rickettsiales	Anaplasmataceae	sf_3	7481	28825	AF179630.1	Wolbachia pipientis	1	1	1	1	1	1	1	1	1	1	1	1	1	1	0.952	1	1	1	1	1	1	1	1	1	1	1	1	1	1	1		2550	1406.33	2019.06	2375.26	2268.34	2484.58	1407.87	1657.04	1724.13	1910.83
Bacteroidetes	Bacteroidetes	Bacteroidales	Bacteroidaceae	sf_6	5792	65426	AF513095.1	activated sludge foam clone 47	0.909	1	0.909	0.917	0.917	0.833	1	1	1	1	0.909	1	1	0.917	1	0.909	0.909	1	0.909	1	1	0.909	0.9	0.909	1	1	1	1	1	1		3135.23	2362.41	2729.05	2851.1	3009.85	3027.2	2692.39	2541.22	3270.48	2847.21
Firmicutes	Bacilli	Lactobacillales	Lactobacillaceae	sf_1	3767	88564	AJ575744.1	Lactobacillus suebicus str. CECT 5917T	0.923	0.949	0.974	0.692	0.711	0.711	0.923	0.9	0.897	0.974	0.949	0.897	0.921	0.667	0.897	0.921	0.744	0.775	0.925	0.923	0.881	0.784	0.711	0.825	0.949	0.921	0.811	0.925	0.949	0.925		2318.28	2592.33	2429.06	1809.54	1704.35	1749.86	1888.19	1801.88	1709.83	2072.18
Firmicutes	Bacilli	Bacillales	Paenibacillaceae	sf_1	3559	47416	AF378696.1	Paenibacillus turicensis str. MOL722	0.92	0.96	0.88	0.76	0.76	0.875	0.846	0.885	0.92	0.962	0.962	0.962	0.88	0.84	0.84	0.846	0.808	0.808	0.885	0.84	0.923	0.808	0.875	0.808	1	1	0.923	0.962	0.962	0.962		3031.76	3015.76	2790.87	2442.68	2531.24	2597.47	1914.26	2228.84	2092.18	2568.92
Acidobacteria	Acidobacteria	Acidobacteriales	Acidobacteriaceae	sf_14	209	76566	AJ519367.1	uranium mining waste pile clone JG37-AG-29 sp.	0.923	0.857	0.846	0.846	0.923	0.846	0.786	0.786	0.846	0.857	0.857	0.929	0.846	0.846	0.917	0.846	0.857	0.846	0.929	0.923	0.786	0.917	0.786	0.923	1	0.857	0.923	0.929	1	0.929		2927.22	3174.79	3236.32	2705.51	3063.78	2827.81	2757.57	2690.39	2641.58	2940.57
Bacteroidetes	Bacteroidetes	Bacteroidales	Unclassified	sf_15	6233	59562	AY134906.1	oral periodontitis clone FX069	0.909	1	1	1	1	1	1	1	1	1	1	1	0.909	1	1	0.909	1	1	0.909	0.818	0.909	1	1	1	1	1	1	1	1	1		2818.36	2518.56	2835.41	2893.11	2800.88	2385.34	2430.67	2558.52	2474.52	2296.08
Firmicutes	Clostridia	Clostridiales	Clostridiaceae	sf_12	4615	15955	L35517.1	Bacteroides cellulosolvens	0.643	0.769	0.5	0.615	0.538	0.6	0.462	0.357	0.417	0.643	0.533	0.769	0.417	0.364	0.357	0.333	0.267	0.467	0.769	0.417	0.462	0.429	0.267	0.333	1	0.538	0.308	0.467	0.857	0.643		628.339	707.957	551.81	349.792	360.643	380.562	443.217	474.52	524.385	387.061
Actinobacteria	Actinobacteria	Actinomycetales	Thermomonosporaceae	sf_1	1406	12046	X97890.1	Actinomadura kijaniata str. DSM 43764T	0.909	0.923	1	0.833	0.833	0.917	0.545	0.667	0.833	0.909	0.909	0.833	0.917	0.833	0.667	1	0.833	0.5	0.286	0.75	0.462	0.818	0.667	0.583	1	0.917	0.667	0.909	0.917	0.917		183.221	258.658	765.443	209.093	255.034	600.887	99.2726	172.946	507.412	215.739
Firmicutes	Bacilli	Bacillales	Bacillaceae	sf_1	3283	34978	AB021194.1	Bacillus niacini str. IFO15566	0.958	0.917	0.905	0.474	0.529	0.5	1	1	0.955	1	1	0.957	0.864	0.45	0.87	1	0.909	0.727	1	0.909	1	0.909	0.45	0.864	1	1	1	1	1	1		732.883	835.37	587.264	219.841	198.859	326.846	270.743	316.707	361.799	563.821
Proteobacteria	Gammaproteobacteria	Unclassified	Unclassified	sf_3	8816	7561	AB015252.1	deepest cold-seep area Japan Trench clone JTB148 proteobacterium	0.818	0.909	0.727	0.769	0.769	0.769	0.833	0.917	0.833	0.917	0.917	0.917	0.75	0.833	0.667	0.917	0.769	0.917	0.917	0.857	0.769	0.75	0.692	0.857	0.833	0.833	0.909	0.75	0.909	0.75		736.116	748.193	399.085	259.901	177.513	426.084	425.168	390.209	494.905	437.823
Proteobacteria	Gammaproteobacteria	Enterobacteriales	Enterobacteriaceae	sf_1	9341	37741	AF214641.1	Nitrogen-fixing isolate str. CC262C	0.941	0.765	0.706	0.6	0.692	0.625	0.833	0.833	0.667	0.938	0.833	0.882	0.706	0.733	0.647	0.824	0.75	0.647	0.833	0.778	0.833	0.812	0.667	0.778	0.833	0.833	0.824	0.824	0.882	0.833		1572.46	1042.3	670.899	625.326	602.195	794.81	724.991	706.916	753.077	815.818
Proteobacteria	Gammaproteobacteria	Unclassified	Unclassified	sf_3	9340	NA			0.385	0.611	0.267	1	0.824	0.941	0.625	0.471	0.444	0.882	0.706	0.722	0.529	0.471	0.188	0.235	0.111	0.062	0.444	0.353	0.444	0.353	0	0.158	0.889	0.611	0.278	0.765	0.941	0.737		47.4218	338.172	97.2713	246.222	189.871	395.129	94.2588	90.7966	75.0397	141.409
Firmicutes	Bacilli	Lactobacillales	Lactobacillaceae	sf_1	3829	70330	AJ417500.1	Lactobacillus paralimentarius str. DSM 13238	0.909	0.955	0.864	0.6	0.6	0.7	0.81	0.81	0.81	0.955	0.909	0.773	0.81	0.632	0.762	0.864	0.789	0.714	0.909	0.895	0.864	0.65	0.722	0.762	0.955	0.905	0.75	0.857	1	0.955		1824.66	1934.19	1869.06	1955.12	1768.39	1787.18	1550.26	1481.93	1477.57	1581.78
Proteobacteria	Gammaproteobacteria	Chromatiales	Ectothiorhodospiraceae	sf_1	9451	7467	X93480.1	Phototrophic (DSM 239) isolate str. DSM 239	0.783	0.913	0.913	0.913	0.913	0.875	0.875	0.875	0.913	0.875	0.875	0.875	0.875	0.913	0.875	0.875	0.913	0.875	0.875	0.913	0.875	0.875	0.87	0.875	0.875	0.875	0.875	0.875	0.875	0.875		1200.63	1094.03	1211.8	925.287	1038.11	1136.22	791.173	766.366	979.983	923.688
Spirochaetes	Spirochaetes	Spirochaetales	Spirochaetaceae	sf_1	6459	79117	AJ431240.1	Spirochaeta sp. str. BHI80-158	1	1	0.889	0.941	0.941	0.941	0.944	0.944	0.944	1	1	1	0.944	0.944	0.944	0.944	0.944	0.944	0.944	0.944	0.944	0.944	0.889	0.944	1	1	0.944	1	1	1		3562.02	3545.53	3692.67	2842.3	2887.39	2831.45	2692.39	2982.24	2153.82	3271.43
Firmicutes	Clostridia	Clostridiales	Clostridiaceae	sf_12	4187	70302	AF538854.1	Clostridiales oral clone P4PB_122 P3	1	1	1	0.938	1	0.938	0.938	0.938	0.938	1	1	1	0.938	0.938	0.938	0.938	1	0.938	1	1	0.938	0.938	0.938	0.938	1	0.938	0.938	0.938	1	1		3514.6	2959.24	2768.14	1659.07	1522.34	1771.71	2620.2	2579.06	2428.07	2781.03
Proteobacteria	Deltaproteobacteria	Desulfobacterales	Desulfobulbaceae	sf_1	10107	77940	AJ535243.1	marine sediment above hydrate ridge clone Hyd24-30 proteobacterium	0.818	0.818	0.909	0.909	0.909	1	0.909	0.909	0.909	0.909	0.909	0.909	0.909	0.818	0.909	0.909	0.909	0.909	0.909	0.909	0.818	0.909	0.818	0.909	1	0.909	0.909	0.909	1	0.909		3299.05	2416.06	2237.24	2211.11	2502.03	2702.17	1736.77	2031.03	2006.42	2054.96
Bacteroidetes	Flavobacteria	Flavobacteriales	Flavobacteriaceae	sf_1	5362	NA			0.571	0.818	0.625	0.75	0.625	0.857	0.6	0.75	0.6	0.75	0.75	0.9	0.778	0.778	0.8	0.857	0.625	0.714	0.818	1	0.625	0.667	0.714	0.5	0.909	1	0.444	0.75	0.875	0.889		1286.86	721.369	875.442	669.294	804.425	1369.29	791.173	808.522	1005.89	853.89
Actinobacteria	Actinobacteria	Actinomycetales	Corynebacteriaceae	sf_1	1374	NA			1	1	1	1	0.944	1	1	1	1	1	1	1	1	1	1	1	1	1	1	1	1	1	1	1	1	1	1	1	1	1		2695.5	3070.37	2758.14	2582.4	2475.07	2416.3	2268.23	2249.38	2570.11	2162.83
Cyanobacteria	Cyanobacteria	Prochlorales	Unclassified	sf_1	5001	60158	AJ347056.1	sponge clone TK09	1	1	0.85	1	1	0.95	1	1	1	1	1	1	1	0.95	1	1	1	1	1	1	1	1	1	1	1	1	1	1	1	1		3475.8	2809.79	2337.24	2674.25	2763.81	3001.71	2233.13	2370.44	2362.86	2427.51
Proteobacteria	Gammaproteobacteria	aquatic clone group	Unclassified	sf_1	8957	45930	AF354614.1	marine clone Arctic97C-5	1	0.917	1	1	1	1	1	1	1	1	1	1	1	0.917	1	1	1	1	1	1	1	1	1	1	1	1	1	1	1	1		2837.76	2134.41	1927.24	1656.14	1765.02	2059.4	2371.51	2286.13	2231.54	1891.79
Firmicutes	Clostridia	Clostridiales	Clostridiaceae	sf_12	4225	81980	AB100486.1	termite gut clone Rs-116	1	1	0.969	1	0.968	0.938	0.969	0.969	0.969	1	1	1	0.969	1	0.938	0.969	1	0.969	1	0.969	0.969	0.969	0.968	0.938	1	0.969	0.969	0.969	0.969	1		3815.3	3453.57	3283.59	2419.23	2066.11	2379.88	3214.83	3227.6	2708.58	3253.3
Firmicutes	Clostridia	Clostridiales	Lachnospiraceae	sf_5	4362	45135	AJ404681.1	anaerobic dechlorinating enrichment clone ZF3 ZF3	0.667	0.833	0.667	0.5	0.455	0.667	0.455	0.6	0.5	0.727	0.727	0.727	0.455	0.5	0.5	0.5	0.5	0.455	0.636	0.4	0.4	0.5	0.4	0.5	0.909	0.636	0.364	0.818	0.818	0.818		1063.76	1123.73	974.531	813.901	539.279	782.974	778.137	735.02	669.998	670.784
Firmicutes	Clostridia	Clostridiales	Clostridiaceae	sf_12	132	77725	AB089019.1	termite gut homogenate clone Rs-J36 bacterium	0.944	0.947	0.895	0.941	0.941	0.889	0.944	0.944	0.944	0.944	0.895	0.833	0.941	0.941	0.765	0.944	0.944	0.882	0.889	1	0.944	0.944	0.944	1	0.944	0.944	0.944	0.947	0.947	0.895		2811.9	2386.36	2198.15	2705.51	2560.45	2211.45	2286.28	1872.14	1798.27	2062.21
Firmicutes	Clostridia	Clostridiales	Lachnospiraceae	sf_5	3218	77765	AB089000.1	termite gut homogenate clone Rs-N53	1	0.944	0.944	0.941	0.941	1	1	1	0.944	0.944	0.944	0.944	1	0.882	0.944	0.944	0.889	1	1	0.944	0.944	1	0.941	0.944	1	0.944	0.944	0.944	0.944	0.944		3227.92	2900.8	2969.05	2432.91	2061.62	2557.41	2427.67	2742.27	2249.41	2743.87
Firmicutes	Bacilli	Lactobacillales	Carnobacteriaceae	sf_1	3812	NA			0.833	0.833	0.833	0.812	0.75	0.812	0.842	0.889	0.889	0.889	0.889	0.889	0.895	0.765	0.842	0.889	0.889	0.833	0.941	0.889	0.889	0.722	0.765	0.889	0.889	0.889	0.833	0.889	0.944	0.889		2005.73	2510.9	2298.15	2271.69	2053.75	2225.1	1524.19	1827.82	1573.15	2049.52
Proteobacteria	Unclassified	Unclassified	Unclassified	sf_20	8479	NA			0.364	0.786	0.714	0.455	0.545	0.5	0.6	0.714	0.615	0.857	0.733	0.812	0.5	0.455	0.417	0.714	0.545	0.462	0.941	0.769	0.5	0.583	0.364	0.385	0.944	0.846	0.571	0.733	0.8	0.625		58.1995	398.525	535.447	95.753	86.5094	203.938	92.2533	132.952	223.333	194.89
Unclassified	Unclassified	Unclassified	Unclassified	sf_160	913	NA			0.909	0.727	0.909	0.818	0.9	0.818	0.818	0.75	0.909	0.923	0.917	0.833	0.909	0.909	0.8	0.909	0.818	0.727	0.727	0.909	0.727	0.818	0.909	0.8	0.923	0.833	0.75	0.923	0.923	0.923		2987.57	2964.03	2793.6	1247.72	1370.67	1636.96	2791.67	2418	2425.39	2176.42
Actinobacteria	Actinobacteria	Actinomycetales	Microbacteriaceae	sf_1	1106	NA			0.769	1	0.929	0.929	0.929	1	0.929	0.929	0.929	1	1	1	0.929	0.929	0.929	1	1	1	1	1	1	1	1	1	1	1	1	1	1	1		1490.55	1589.31	1405.43	1966.85	1587.5	1698.87	1248.43	1399.78	2219.03	1201.97
Proteobacteria	Alphaproteobacteria	Rhodobacterales	Rhodobacteraceae	sf_1	7649	5867	AF082791.1	Hyphomonas johnsonii str. MHS-2	0.6	0.667	0.625	0.95	0.95	0.95	0.714	0.8	0.95	0.842	0.842	0.947	0.952	0.905	0.8	0.706	0.789	0.722	0.647	0.588	0.526	0.765	0.765	0.632	0.85	0.737	0.526	0.85	0.85	0.9		1950.76	1695.65	1028.17	1806.61	1756.03	2038.46	1319.62	1460.31	1472.21	1376.92
Firmicutes	Bacilli	Bacillales	Alicyclobacillaceae	sf_1	3376	25597	AB059675.1	Alicyclobacillus acidoterrestris str. DSM 2498	0.731	0.846	0.75	0.68	0.72	0.68	0.615	0.692	0.708	0.846	0.885	0.808	0.72	0.696	0.682	0.68	0.64	0.538	0.64	0.75	0.667	0.654	0.692	0.654	1	0.778	0.667	0.926	0.963	0.926		2125.36	1961.01	1965.43	1771.43	1952.64	1743.48	1618.44	1624.61	1616.03	1671.52
Firmicutes	Bacilli	Lactobacillales	Lactobacillaceae	sf_1	3885	15151	M58834.1	Pediococcus pentosaceus	0.969	0.912	0.939	0.625	0.724	0.75	0.818	0.879	0.909	0.939	0.939	0.882	0.853	0.7	0.853	0.912	0.719	0.848	0.912	0.812	0.886	0.774	0.677	0.794	0.912	0.879	0.688	0.912	0.941	0.912		1867.77	1832.64	1734.52	1136.33	1177.43	1434.85	1254.44	1310.06	1321.24	1475.72
Cyanobacteria	Cyanobacteria	Nostocales	Unclassified	sf_1	5004	108010	AJ630458.1	Anabaena augstumalis 'SCHMIDKE JAHNKE/4a' str. SCMIDKE JAHNKE/4a	1	0.974	0.974	0.974	0.974	0.974	1	1	0.974	1	1	1	0.974	0.974	0.974	0.921	0.947	0.974	0.921	0.868	0.895	0.947	0.892	0.974	1	0.974	0.974	1	1	1		2179.25	2197.64	2009.97	2426.07	2414.4	2400.82	2413.63	2126.15	2186.87	2438.39
Chloroflexi	Anaerolineae	Unclassified	Unclassified	sf_9	375	65693	AF507690.1	forest soil clone C043	1	1	1	1	1	1	1	0.944	1	1	1	0.944	1	1	1	1	1	1	1	1	1	1	1	1	1	0.944	1	1	1	1		4145.1	3542.66	3425.4	2031.33	2051.51	2593.83	3209.81	2787.67	2940.84	3019.43
Proteobacteria	Gammaproteobacteria	Enterobacteriales	Enterobacteriaceae	sf_1	8603	63938	AF476106.1	Melanococcus albizziae symbiont	0.941	1	1	0.941	0.824	0.938	1	1	1	1	1	1	1	0.882	0.941	1	0.938	0.882	1	1	1	0.941	0.706	0.941	1	1	1	1	1	1		3682.73	2732.2	1871.79	1595.56	1251.58	1914.65	2362.49	2445.02	2290.5	2364.97
Firmicutes	Clostridia	Clostridiales	Peptostreptococcaceae	sf_5	3080	78018	AB088986.1	termite gut homogenate clone Rs-F43 bacterium	0.976	1	0.976	0.825	0.811	0.923	0.95	0.927	0.974	0.951	0.951	0.95	0.951	0.805	0.8	0.95	0.925	0.949	0.976	0.951	0.951	0.95	0.821	0.95	1	0.951	0.927	1	1	0.976		3430.54	3146.05	2918.14	2674.25	2794.14	2222.37	2522.93	2208.3	2018.93	2307.86
Cyanobacteria	Cyanobacteria	Oscillatoriales	Unclassified	sf_1	5017	62923	AF448077.1	Synechococcus sp. str. PCC 8806	0.886	0.889	0.844	0.889	0.87	0.87	0.864	0.864	0.792	0.844	0.848	0.848	0.979	0.778	0.787	0.791	0.761	0.761	0.778	0.791	0.739	0.8	0.717	0.841	0.851	0.804	0.756	0.848	0.889	0.867		1847.3	1637.21	1437.25	1747.98	1736.93	1779.9	1531.2	1494.9	1350.72	1521.95
Firmicutes	Bacilli	Bacillales	Staphylococcaceae	sf_1	3654	26685	AF322002.1	Staphylococcus pettenkoferi str. B3117	0.981	0.913	0.893	0.797	0.819	0.811	0.878	0.892	0.871	0.933	0.927	0.914	0.842	0.79	0.822	0.876	0.822	0.8	0.928	0.898	0.919	0.836	0.761	0.844	0.967	0.894	0.837	0.88	0.94	0.927		2767.71	2483.12	2236.33	2223.82	2373.95	2211.45	2108.79	2089.4	2031.43	2172.8
Proteobacteria	Alphaproteobacteria	Unclassified	Unclassified	sf_6	7399	20378	AF234728.1	sludge clone A20	0.5	0.25	0.917	0.533	0.571	0.714	0.2	0.286	0.714	0.533	0.429	0.375	0.571	0.429	0.182	0.357	0.538	0	0.267	0.333	0.357	0.429	0.5	0.143	0.667	0.667	0.143	0.667	0.8	0.733		66.8216	45.0257	343.631	71.3262	85.3859	167.52	29.0799	58.3692	146.506	87.0206
Bacteroidetes	Bacteroidetes	Bacteroidales	Porphyromonadaceae	sf_1	6012	25137	AJ400264.1	mouse feces clone L11-6	0.923	1	1	0.923	0.923	0.923	1	1	1	1	1	1	1	0.923	1	1	1	1	1	1	1	1	1	1	0.923	1	1	0.923	0.923	0.923		2819.44	2770.52	3049.05	2177.89	2516.64	2393.53	2297.31	2307.75	2397.7	2403.94
Proteobacteria	Gammaproteobacteria	Enterobacteriales	Enterobacteriaceae	sf_1	8528	10077	Y17665.1	Enterobacter cloacae Nr. 3	0.964	0.964	0.971	0.867	0.758	0.76	0.986	0.979	0.979	0.979	0.986	0.986	0.986	0.964	0.971	0.993	0.957	0.942	0.986	0.979	1	0.979	0.957	0.993	0.978	0.993	0.978	1	0.993	1		4355.26	3157.55	1757.25	1076.73	1001.04	1094.34	1947.35	2117.51	1608.89	2093.03
Firmicutes	Clostridia	Clostridiales	Clostridiaceae	sf_12	4406	77727	AB088977.1	termite gut homogenate clone Rs-J39 bacterium	1	1	1	0.846	0.923	0.923	1	1	1	1	1	1	1	1	0.923	1	1	0.923	1	1	1	1	1	1	0.929	1	1	1	1	1		2625.44	2785.84	2489.96	1435.32	1285.28	1535.9	1949.35	2044	1748.25	2169.17
Bacteroidetes	Sphingobacteria	Sphingobacteriales	Crenotrichaceae	sf_11	5381	2555	L10944.1	marine snow clone agg32	0.636	0.636	0.636	0.933	0.933	0.867	0.583	0.667	0.667	0.583	0.583	0.615	0.667	0.7	0.583	0.583	0.636	0.538	0.636	0.583	0.636	0.636	0.583	0.583	0.818	0.7	0.583	0.583	0.909	0.75		409.552	740.529	703.626	1037.65	1086.42	925.002	998.743	724.211	760.224	757.805
Proteobacteria	Gammaproteobacteria	Unclassified	Unclassified	sf_3	9509	NA			0.643	0.812	0.688	0.714	0.667	0.714	0.688	0.625	0.667	0.875	0.812	0.75	0.733	0.667	0.5	0.812	0.6	0.562	1	0.812	0.812	0.5	0.286	0.533	1	0.875	0.562	0.688	0.938	0.812		719.949	588.208	417.267	321.457	279.751	538.067	266.732	324.274	420.759	406.096
Cyanobacteria	Cyanobacteria	Nostocales	Unclassified	sf_1	5199	79820	AB074502.1	Anabaena variabilis str. IAM M-204	1	0.973	0.973	0.973	0.973	0.973	1	1	0.973	1	1	1	0.973	0.973	0.973	0.919	0.946	0.973	0.919	0.865	0.892	0.946	0.917	0.973	1	0.973	0.973	1	1	1		1996.03	2093.22	1884.52	2409.46	2405.41	2434.5	2302.32	1984.55	2075.21	2455.61
Cyanobacteria	Unclassified	Unclassified	Unclassified	sf_5	5002	3252	AJ000711.1	Dactylococcopsis salina str. PCC 8305	1	0.818	1	0.9	0.9	1	0.7	1	1	1	1	0.818	1	0.9	0.889	1	1	0.9	0.7	0.9	1	0.9	0.9	1	0.6	0.8	0.9	0.9	0.9	0.9		2091.95	1778.04	2235.42	1728.44	1669.52	2139.52	1617.44	1518.68	1773.26	1434.93
Firmicutes	Desulfotomaculum	Unclassified	Unclassified	sf_1	198	60009	AB091323.1	Pelotomaculum sp. str. JT	0.97	0.939	0.818	0.844	0.844	0.844	0.848	0.848	0.879	0.879	0.848	0.879	0.844	0.812	0.875	0.818	0.848	0.818	0.909	0.818	0.848	0.909	0.848	0.848	0.939	0.909	0.818	0.882	0.97	0.909		2940.15	2294.39	1972.7	2588.26	2667.18	2575.62	2417.64	2216.95	2131.49	2364.06
Firmicutes	Bacilli	Lactobacillales	Lactobacillaceae	sf_1	3703	95759	AY389803.1	Lactobacillus salivarius str. RA2115	0.952	0.952	0.951	0.925	0.85	0.875	0.902	0.878	0.925	0.951	0.976	0.951	0.951	0.9	0.878	0.927	0.875	0.85	0.976	0.95	0.951	0.878	0.85	0.927	0.952	0.951	0.95	0.951	0.976	0.951		2490.72	2242.66	2031.79	1956.1	1712.21	1737.11	1950.36	1955.37	2014.46	2014.16
Firmicutes	Desulfotomaculum	Unclassified	Unclassified	sf_1	2359	60016	AB091324.1	UASB granular sludge clone JP	0.967	0.933	0.933	0.966	0.966	0.966	0.9	0.967	0.967	0.933	0.933	0.933	0.931	0.931	0.931	0.933	0.967	0.9	0.933	0.933	0.933	0.967	0.967	0.933	0.933	0.967	0.9	0.935	0.967	0.967		3243.01	2518.56	2195.42	2878.45	2970.53	2866.96	2671.34	2451.51	2361.96	2611.53
Proteobacteria	Epsilonproteobacteria	Campylobacterales	Helicobacteraceae	sf_3	10481	57474	AJ441203.1	hydrothermal vent polychaete mucous clone P. palm C/A 13	0.706	0.9	0.85	1	0.812	0.941	0.895	1	0.944	1	1	0.947	1	0.889	0.833	0.842	0.889	0.882	0.95	0.9	0.9	0.889	0.889	0.842	0.95	0.895	0.9	0.947	1	0.85		2310.74	3019.6	3470.86	2666.43	2724.48	2213.27	2943.08	2784.43	2395.91	2479.18
Proteobacteria	Gammaproteobacteria	Pasteurellales	Pasteurellaceae	sf_1	8861	9523	AB004031.1	Haemophilus parasuis 427	0.955	0.955	1	0.789	0.714	0.75	0.81	0.81	0.857	0.762	0.762	0.8	0.762	0.714	0.75	0.762	0.7	0.714	0.818	0.762	0.773	0.789	0.8	0.682	0.818	0.857	0.773	0.762	0.762	0.81		3691.36	2700.58	2407.24	3064.1	2476.19	2421.76	2710.44	2796.32	2366.43	2626.03
Proteobacteria	Deltaproteobacteria	Desulfobacterales	Desulfobacteraceae	sf_5	10228	71766	AF354151.1	marine methane seep clone 1527	0.778	0.455	0.6	0.8	0.8	0.5	0.727	0.818	0.7	0.909	0.818	0.636	0.8	0.5	0.6	0.8	0.7	0.6	0.625	0.778	0.7	0.7	0.6	0.545	0.545	0.818	0.636	0.9	0.818	0.727		782.46	340.088	410.903	258.924	350.531	368.726	169.465	242.124	247.452	365.305
Actinobacteria	Actinobacteria	Actinomycetales	Unclassified	sf_3	1201	60177	AJ347031.1	sponge clone TK39	0.8	0.8	0.875	0.9	0.9	0.889	0.7	0.9	0.727	0.9	0.9	0.818	0.8	0.889	0.778	0.7	0.9	0.778	0.636	0.8	0.5	0.8	0.7	0.7	0.818	0.8	0.7	0.818	1	0.909		2068.24	1748.34	2405.42	2371.35	1949.27	2490.04	1958.38	1961.85	1622.29	2147.42
Actinobacteria	Actinobacteria	Actinomycetales	Nocardioidaceae	sf_1	1623	31964	AB078817.1	Propionicimonas paludicola str. K2	0.684	0.727	0.7	0.667	0.75	0.722	0.667	0.737	0.737	0.75	0.7	0.682	0.8	0.75	0.667	0.684	0.778	0.591	0.591	0.789	0.591	0.737	0.667	0.55	0.609	0.941	0.55	0.737	0.684	0.789		355.664	464.627	805.443	528.596	621.294	727.438	380.044	466.954	684.291	403.377
Firmicutes	Bacilli	Bacillales	Staphylococcaceae	sf_1	3258	14785	D83358.1	Staphylococcus auricularis str. MAFF911484 ATCC33753T	0.989	0.954	0.953	0.845	0.81	0.821	0.94	0.94	0.928	0.953	0.977	0.943	0.88	0.817	0.843	0.904	0.88	0.795	0.977	0.929	0.976	0.928	0.759	0.905	0.989	0.942	0.917	0.941	0.976	0.965		2781.72	2484.08	1995.43	2042.08	2079.6	2098.55	2051.63	2044	1949.25	2109.34
Chloroflexi	Anaerolineae	Chloroflexi-1a	Unclassified	sf_1	159	65479	AJ278169.1	anaerobic bioreactor clone SHD-235	0.929	0.857	0.929	1	1	1	1	0.867	1	1	1	0.933	0.929	0.929	1	1	1	1	1	0.929	0.929	0.929	0.929	1	1	0.933	0.929	0.933	1	1		2052.07	1685.11	1995.43	1525.21	1500.99	1341.98	1359.73	1539.22	1939.42	1609.88
Proteobacteria	Gammaproteobacteria	Alteromonadales	Alteromonadaceae	sf_1	8167	31197	AF359542.1	Alexandrium tamarense PCC 173a	0.9	0.8	0.9	0.9	0.9	1	0.818	0.818	0.818	0.9	0.818	0.909	0.818	0.9	1	0.9	0.727	0.9	0.9	0.9	0.8	0.727	0.727	0.818	1	1	0.9	0.818	0.818	0.818		2365.7	1332.57	1905.43	2569.7	2569.44	1800.84	1863.12	1367.35	1536.53	1553.68
Firmicutes	Bacilli	Bacillales	Staphylococcaceae	sf_1	3638	14824	X86641.1	Staphylococcus sp str. AG-30	0.986	0.897	0.914	0.766	0.794	0.793	0.913	0.928	0.928	0.964	0.971	0.942	0.92	0.781	0.913	0.897	0.853	0.838	0.914	0.913	0.928	0.855	0.759	0.884	0.964	0.921	0.871	0.92	0.942	0.935		2783.88	2602.87	2292.69	2137.83	2245.87	2170.48	1968.41	2020.22	2051.98	2149.23
Firmicutes	Bacilli	Bacillales	Bacillaceae	sf_1	3491	74659	AF326361.1	Bacillus sp. str. MB-12	0.852	0.851	0.823	0.533	0.541	0.593	0.858	0.846	0.871	0.892	0.886	0.899	0.871	0.563	0.818	0.854	0.832	0.712	0.928	0.789	0.855	0.796	0.621	0.777	0.921	0.864	0.784	0.893	0.899	0.872		1555.22	1772.29	1446.34	1089.43	1149.34	1111.64	943.591	993.358	1092.54	1215.57
Proteobacteria	Gammaproteobacteria	Pasteurellales	Pasteurellaceae	sf_1	8409	86047	AF499896.1	human colonic mucosal biopsy clone ABLCf1	1	1	0.955	0.93	0.909	0.909	0.955	0.955	0.977	0.955	0.955	0.977	0.932	0.886	0.93	0.932	0.909	0.953	0.955	0.955	0.955	0.953	0.841	0.932	0.955	0.955	0.932	0.932	0.955	0.932		4424.24	2897.93	2581.78	2553.09	2243.63	2233.3	3097.51	3205.98	2550.46	3229.73
Firmicutes	Clostridia	Clostridiales	Lachnospiraceae	sf_5	2668	77853	AB088998.1	termite gut homogenate clone Rs-G40 bacterium	1	1	1	0.963	0.962	0.923	1	1	1	1	1	1	0.964	0.926	0.964	1	0.964	1	1	1	1	1	1	1	1	1	0.964	1	1	1		4299.22	3730.43	3547.22	2620.51	2849.19	2726.75	2745.54	3031.96	2298.54	3205.26
Actinobacteria	Actinobacteria	Bifidobacteriales	Bifidobacteriaceae	sf_1	1109	55846	AY148470.1	Bifidobacterium thermacidophilum porcinum subsp. suis str. P3-14 subsp.	0.839	0.968	0.828	0.966	0.966	0.966	0.966	0.897	0.966	0.964	0.897	0.964	0.931	0.931	0.931	0.929	0.966	0.966	0.926	0.857	0.897	0.931	0.931	1	0.967	1	0.897	0.931	0.966	0.931		1822.51	2098.01	1797.25	2066.51	1973.99	2043.02	1956.37	1587.86	1699.11	1868.22
Firmicutes	Bacilli	Lactobacillales	Enterococcaceae	sf_1	3881	17444	AJ301829.1	Enterococcus dispar str. LMG 13521	1	0.925	0.974	0.811	0.73	0.865	0.923	0.923	0.974	0.974	0.974	0.923	0.974	0.838	0.947	0.974	0.973	0.868	0.975	0.949	0.975	0.838	0.789	0.949	1	0.923	0.921	0.974	0.974	0.974		2735.38	2650.77	2421.78	2097.77	1959.38	1878.23	2011.52	2127.23	1934.95	2080.34
Firmicutes	Bacilli	Bacillales	Staphylococcaceae	sf_1	3592	14862	Y12593.1	Staphylococcus caprae str. DSM 20608	0.977	0.891	0.89	0.772	0.776	0.785	0.871	0.882	0.889	0.934	0.93	0.911	0.857	0.771	0.828	0.876	0.834	0.772	0.911	0.887	0.909	0.836	0.759	0.838	0.949	0.892	0.852	0.881	0.923	0.919		2436.83	2165.07	1858.15	1805.63	1891.97	1860.02	1693.65	1695.95	1750.03	1821.99
Firmicutes	Clostridia	Clostridiales	Lachnospiraceae	sf_5	4289	81319	AB100487.1	termite gut clone Rs-039	0.833	1	0.917	0.5	0.5	0.5	0.75	0.75	0.833	0.75	0.667	0.917	0.833	0.75	0.833	0.667	0.667	0.75	0.833	0.833	0.667	0.75	0.75	0.667	0.833	0.833	0.667	0.833	0.917	0.917		822.337	1316.28	1150.89	826.603	624.665	905.883	886.434	849.597	934.423	904.652
Proteobacteria	Gammaproteobacteria	Enterobacteriales	Enterobacteriaceae	sf_1	8534	9870	AF130967.1	Pantoea oleae str. A66	0.571	0.625	0.5	0.333	0.333	0.417	0.5	0.583	0.5	0.667	0.571	0.5	0.583	0.455	0.462	0.692	0.636	0.462	0.562	0.538	0.688	0.727	0.636	0.533	0.938	0.706	0.667	0.733	0.714	1		576.606	308.474	298.177	175.873	106.732	173.893	169.465	206.454	217.079	270.127
Firmicutes	Clostridia	Clostridiales	Peptococc/Acidaminococc	sf_11	771	13827	X82500.1	Dialister pneumosintes str. ATCC 33048	0.933	0.833	0.75	0.667	0.692	0.704	0.679	0.679	0.704	0.679	0.731	0.704	0.731	0.654	0.667	0.643	0.704	0.692	0.679	0.704	0.679	0.704	0.704	0.731	0.714	0.704	0.679	0.731	0.76	0.76		2852.85	1989.75	1831.79	1946.33	2018.93	2081.26	1772.87	1700.27	1970.69	1763.98
Proteobacteria	Gammaproteobacteria	Enterobacteriales	Enterobacteriaceae	sf_1	9266	9994	Z14096.1	Parasite BEV of E.variegatus	0.95	0.95	0.75	0.824	0.688	0.737	0.789	0.85	0.895	0.9	0.85	0.9	0.889	0.75	0.789	0.8	0.632	0.706	0.95	1	1	0.789	0.684	0.842	0.95	0.95	0.9	0.9	0.95	0.95		1989.56	1301.91	859.988	903.791	966.208	975.987	1111.05	923.099	1025.54	1034.28
Bacteroidetes	Sphingobacteria	Sphingobacteriales	Flexibacteraceae	sf_19	5307	58606	AB078082.1	Microscilla sericea str. IFO 16561	0.833	0.917	1	1	0.909	1	0.917	0.917	1	0.917	0.917	1	0.917	0.917	1	0.917	0.917	0.917	0.917	1	0.917	0.917	0.909	0.833	0.833	0.917	0.833	0.833	0.833	0.917		3060.86	2457.25	2343.6	2259.97	1844.78	2053.03	2681.36	2519.61	2342.31	2343.21
Proteobacteria	Alphaproteobacteria	Rhodobacterales	Rhodobacteraceae	sf_1	7615	5814	M60671.1	Rhodobacter capsulatus str. B10	0.667	0.833	0.615	1	0.857	0.786	0.857	0.929	0.929	0.786	0.714	1	1	1	0.857	0.714	1	1	1	0.929	0.714	0.714	0.714	0.714	0.857	0.786	0.714	1	0.929	0.929		829.882	751.067	536.356	496.352	563.996	622.738	864.374	765.285	793.277	579.231
Actinobacteria	Actinobacteria	Actinomycetales	Streptomycetaceae	sf_1	1771	11764	D63872.1	Streptomyces setonii str. ATCC25497	0.882	1	0.889	0.941	0.875	0.938	0.944	1	0.944	1	0.944	0.833	1	0.944	0.944	1	0.944	0.941	0.941	0.938	0.941	0.889	0.882	0.941	1	1	0.889	1	1	1		1507.8	1365.14	1329.98	1326.86	1115.63	1337.43	1085.98	1159.82	1504.37	1143.05
Cyanobacteria	Cyanobacteria	Chloroplasts	Chloroplasts	sf_5	5158	30150	AF172715.1	Pavlova gyrans	0.643	0.667	0.6	0.867	0.8	0.867	0.643	0.846	0.786	0.733	0.857	0.786	0.8	0.714	0.5	0.733	0.714	0.6	0.5	0.333	0.4	0.846	0.533	0.733	0.867	0.714	0.467	0.786	0.929	0.733		285.609	213.633	312.723	413.301	583.096	637.305	275.757	304.817	474.358	209.393
Bacteroidetes	Sphingobacteria	Sphingobacteriales	Flexibacteraceae	sf_19	5368	58617	AB078071.1	Flexibacter tractuosus str. IFO 15981	0.7	0.818	0.9	0.75	0.9	0.9	0.917	1	0.75	1	1	1	0.75	0.75	0.75	0.818	0.818	0.818	0.818	0.818	1	0.818	0.9	0.818	0.917	1	1	1	1	1		827.726	1150.55	1407.25	1300.48	1431.34	1930.12	2063.67	2286.13	2202.95	1813.84
Firmicutes	Clostridia	Clostridiales	Clostridiaceae	sf_12	4584	15957	X71852.1	Clostridium papyrosolvens str. DSM 2782	1	1	1	0.852	0.88	0.963	1	0.964	1	1	1	1	1	0.852	0.808	1	0.963	0.963	1	0.964	1	1	0.815	0.964	1	1	0.964	1	1	1		4068.58	3606.85	3236.32	2856.96	2687.41	2553.77	3047.37	3106.54	2514.72	3129.12
Firmicutes	Clostridia	Clostridiales	Peptostreptococcaceae	sf_5	699	52800	AJ318205.2	Clostridium sp. 4	0.808	0.885	0.808	0.692	0.72	0.769	0.741	0.75	0.88	0.786	0.793	0.793	0.741	0.679	0.655	0.808	0.741	0.769	0.793	0.815	0.724	0.714	0.72	0.731	0.926	0.92	0.741	0.828	0.926	0.852		1899.03	2034.78	1881.79	2089.96	1980.73	1732.56	1859.11	1527.33	1663.38	1604.44
Cyanobacteria	Cyanobacteria	Nostocales	Unclassified	sf_1	5072	51799	AF268023.1	Nodularia spumigena str. PCC73104	1	0.971	0.971	0.971	0.971	0.971	1	1	0.971	1	1	1	0.971	0.971	0.971	0.914	0.943	0.971	0.914	0.857	0.886	0.943	0.912	0.971	1	0.971	0.971	1	1	1		1905.49	2013.7	1829.97	2332.27	2357.1	2348.01	2296.31	1992.12	2105.58	2341.4
Firmicutes	Clostridia	Clostridiales	Lachnospiraceae	sf_5	2994	81051	AB100463.1	termite gut clone Rs-L15	1	1	1	0.938	1	1	1	1	1	1	1	1	1	1	1	1	1	1	1	1	1	1	1	1	1	1	1	1	1	1		4064.27	3910.53	3644.49	2391.87	2836.83	2636.62	2582.09	2784.43	1977.83	3183.5
Firmicutes	Bacilli	Bacillales	Alicyclobacillaceae	sf_1	3487	55934	AJ496806.1	Alicyclobacillus acidocaldarius str. DSM 446	0.905	0.864	0.833	0.833	0.875	0.833	0.792	0.87	0.833	0.833	0.87	0.727	0.833	0.833	0.818	0.833	0.875	0.773	0.682	0.875	0.909	0.833	0.917	0.783	0.704	0.833	0.84	0.913	0.957	0.87		1783.71	1642	2105.42	1787.06	1969.49	1710.71	1155.17	1306.82	1307.84	1355.16
Chlorobi	Unclassified	Unclassified	Unclassified	sf_8	549	60815	AY118151.1	benzene-degrading nitrate-reducing consortium clone Cart-N2 bacterium	0.769	0.846	0.923	0.923	1	0.923	0.923	1	0.923	1	1	1	1	0.846	1	0.923	0.923	1	1	1	1	1	0.846	1	1	1	0.923	1	1	1		4396.22	4241.99	3612.67	2802.24	2675.05	2623.87	4157.42	4025.32	3108.79	3973.04
Bacteroidetes	Bacteroidetes	Bacteroidales	Porphyromonadaceae	sf_1	5817	77707	AB088927.2	termite gut homogenate clone Rs-N56 bacterium	0.923	0.923	0.923	0.923	0.917	0.917	1	0.923	0.923	0.923	0.923	0.923	1	1	0.923	0.923	0.923	0.923	0.923	1	0.923	0.923	1	0.923	0.923	1	0.923	1	1	1		4057.8	2984.15	3566.31	1928.74	1945.9	2175.03	2897.96	2743.35	2555.82	2723.93
Bacteroidetes	Bacteroidetes	Bacteroidales	Unclassified	sf_15	5782	75791	AF550591.1	Bacteroidetes Ko710	0.765	0.789	0.684	0.9	0.9	0.9	0.824	0.833	0.778	0.938	0.889	0.833	0.789	0.737	0.778	0.722	0.789	0.789	0.737	0.875	0.812	0.789	0.737	0.789	0.842	0.833	0.842	0.85	0.947	0.9		2367.86	2067.35	1937.24	2404.57	2182.96	1969.27	2156.92	2025.63	1917.09	2166.45
Actinobacteria	Actinobacteria	Actinomycetales	Unclassified	sf_3	1822	69307	AY145533.1	dilution (10e-7) brackish section Weser estuary isolate str. GP-5 GP-5	0.846	0.8	0.714	0.929	0.857	0.929	0.857	0.857	0.857	0.857	0.933	0.929	0.933	0.786	0.786	0.643	0.933	0.857	0.857	0.786	0.786	0.786	0.571	0.8	0.933	1	0.8	0.867	0.933	0.933		1745.98	1515.55	1486.34	1840.8	1807.71	1751.68	1688.64	1710	1422.18	1797.52
Firmicutes	Bacilli	Bacillales	Bacillaceae	sf_1	3492	83961	AB042061.1	Bacillus subtilis str. IAM 12118T	0.973	0.895	0.907	0.652	0.667	0.686	0.934	0.961	0.974	0.947	0.973	0.961	0.921	0.778	0.921	0.947	0.908	0.829	0.974	0.907	0.961	0.908	0.784	0.934	1	0.947	0.908	0.947	0.974	0.974		1731.97	1911.2	1535.43	1543.77	1462.79	1323.77	1146.15	1225.75	1253.34	1434.03
Firmicutes	Clostridia	Clostridiales	Clostridiaceae	sf_12	4341	28961	AB041865.1	Clostridium novyi subsp. type C str. ATCC27323	0.867	0.937	0.883	0.829	0.815	0.843	0.873	0.879	0.885	0.899	0.909	0.926	0.862	0.813	0.825	0.874	0.882	0.835	0.918	0.915	0.901	0.897	0.822	0.886	0.935	0.923	0.851	0.914	0.932	0.908		2008.96	2114.29	1935.43	1518.37	1513.35	1566.86	1572.32	1594.34	1491.86	1638.89
Firmicutes	Clostridia	Clostridiales	Clostridiaceae	sf_12	4415	78388	AB089041.1	termite gut homogenate clone Rs-K32 bacterium	1	0.957	0.957	1	0.95	0.905	1	1	1	0.955	0.955	0.955	0.952	0.905	1	0.952	0.952	0.952	1	0.955	0.952	1	1	1	1	0.909	0.955	0.87	0.87	0.87		2609.28	2956.37	2753.6	3577.06	3916.51	3426.88	2714.45	2836.31	3026.6	2542.63
Actinobacteria	Actinobacteria	Actinomycetales	Micromonosporaceae	sf_1	1750	12906	X93196.1	Dactylosporangium vinaceum str. DSM 43823	0.827	0.778	0.784	0.782	0.784	0.778	0.827	0.811	0.811	0.788	0.833	0.778	0.873	0.811	0.765	0.826	0.837	0.694	0.769	0.8	0.804	0.816	0.792	0.776	0.911	0.796	0.736	0.8	0.891	0.907		1557.38	1334.48	1438.16	1919.95	1979.6	1828.15	1037.85	1070.1	1485.61	1053.31
Firmicutes	Bacilli	Lactobacillales	Enterococcaceae	sf_1	3713	15279	AF061009.1	Enterococcus cecorum str. ATCC43198	0.966	1	0.966	0.692	0.75	0.771	0.845	0.897	0.948	0.949	0.966	0.898	0.915	0.712	0.947	0.983	0.796	0.895	0.983	0.821	0.983	0.782	0.72	0.839	1	0.914	0.75	0.983	1	0.983		2422.82	2492.7	2245.42	2248.24	2379.57	2233.3	1969.41	2033.19	1925.13	1967.03
Firmicutes	Mollicutes	Anaeroplasmatales	Erysipelotrichaceae	sf_3	3965	59904	AY133091.1	TCE-contaminated site clone ccslm238	1	1	1	0.875	0.913	0.875	1	1	1	1	1	1	1	0.875	1	1	1	1	1	1	1	1	0.958	1	1	1	1	1	1	1		4224.85	3670.07	3543.58	2776.84	2969.41	2964.38	3139.62	3103.3	3057.87	3313.13
Proteobacteria	Betaproteobacteria	Neisseriales	Neisseriaceae	sf_1	7675	75888	AY157705.1	Neisseria sp. str. CCUG 46910	0.949	0.967	0.983	0.982	0.965	0.948	0.948	0.966	0.983	0.966	0.966	0.949	0.949	0.931	0.883	0.966	0.949	0.932	0.917	0.932	0.948	0.931	0.932	0.932	0.933	1	0.948	0.966	1	0.983		3064.1	2788.72	2872.69	1875.98	1606.6	1993.85	2699.41	2683.9	2254.77	2786.47
Firmicutes	Clostridia	Clostridiales	Peptococc/Acidaminococc	sf_11	392	55383	AF481210.1	oral endodontic infection clone MCE7_134	0.8	0.929	0.714	0.5	0.667	0.692	0.467	0.571	0.833	0.571	0.714	0.533	0.5	0.571	0.4	0.643	0.538	0.467	0.533	0.75	0.5	0.533	0.692	0.467	0.667	0.833	0.538	0.692	0.769	0.769		1729.82	1736.84	1460.89	1171.51	1856.02	1473.99	996.737	1008.49	1410.57	1188.38
Firmicutes	Bacilli	Lactobacillales	Lactobacillaceae	sf_1	3330	85653	AB107637.1	Lactobacillus kitasatonis str. KM9212	0.9	0.951	0.925	0.921	0.892	0.892	0.878	0.878	0.921	0.902	0.927	0.951	0.9	0.868	0.854	0.976	0.895	0.897	0.951	0.974	0.951	0.875	0.895	0.923	0.951	0.9	0.875	0.925	0.927	0.925		2964.94	2827.04	2643.6	2971.27	2858.18	2554.68	2785.65	2670.93	2655.87	2654.13
Proteobacteria	Betaproteobacteria	Burkholderiales	Alcaligenaceae	sf_1	7984	26755	AJ318125.1	Waste-gas biofilter clone BIfciii38	0.941	0.943	0.971	0.943	0.941	0.912	0.971	0.971	0.971	1	0.971	0.971	0.943	0.971	0.971	0.971	0.971	0.971	0.971	0.971	0.943	0.971	0.971	0.971	0.971	0.943	0.971	0.943	0.971	0.971		3445.63	3137.43	3312.68	2071.39	1705.47	2217.82	3202.8	3143.29	2836.32	3266.9
Actinobacteria	Actinobacteria	Actinomycetales	Cellulomonadaceae	sf_1	1592	46611	X92152.1	Lake Bogoria isolate 69B4	0.667	0.524	0.474	0.688	0.75	0.692	0.579	0.611	1	0.579	0.55	0.632	0.929	0.8	0.765	0.786	0.786	0.611	0.529	0.529	0.429	0.786	0.692	0.733	0.87	0.733	0.5	0.714	0.826	0.773		349.197	331.466	359.086	220.818	273.01	330.488	252.694	266.985	605.678	251.091
Natronoanaerobium	Unclassified	Unclassified	Unclassified	sf_1	4377	55772	AF507888.1	Mono Lake at depth 35m station 6 July 2000 clone ML635J-65 G+C	0.958	1	1	1	1	0.917	1	1	1	1	1	1	1	0.917	0.958	1	1	0.958	1	1	1	1	1	1	1	1	1	1	1	1		2853.93	2883.56	2559.96	1899.43	1731.31	1933.76	2027.57	2089.4	1968.9	2403.04
Synergistes	Unclassified	Unclassified	Unclassified	sf_3	677	18164	AF280829.1	bioreactor clone tbr4-7	0.538	0.571	0.643	0.467	0.615	0.615	0.429	0.583	0.583	0.538	0.5	0.538	0.583	0.583	0.5	0.462	0.5	0.429	0.4	0.462	0.571	0.333	0.417	0.286	0.588	0.833	0.4	0.467	0.917	0.667		292.075	299.852	493.629	336.113	273.01	426.084	95.2616	174.027	313.559	228.429
Firmicutes	Clostridia	Clostridiales	Lachnospiraceae	sf_5	3060	77862	AB089002.1	termite gut homogenate clone Rs-B14 bacterium	1	1	1	0.882	0.875	0.875	1	1	1	1	1	1	0.944	0.941	1	1	0.944	1	1	1	1	1	1	1	1	1	0.944	1	1	1		4161.26	3921.07	3579.95	2338.13	2524.5	2388.07	2695.4	3043.85	2061.81	3168.09
Firmicutes	Bacilli	Lactobacillales	Enterococcaceae	sf_1	3382	NA			0.984	0.952	0.951	0.618	0.612	0.708	0.833	0.852	0.918	0.951	0.951	0.885	0.902	0.679	0.9	0.933	0.754	0.8	0.984	0.828	0.984	0.69	0.63	0.831	1	0.869	0.729	0.967	0.967	0.951		1852.68	1988.79	1742.7	1542.8	1558.29	1453.05	1374.78	1438.69	1313.2	1492.04
Natronoanaerobium	Unclassified	Unclassified	Unclassified	sf_1	769	70140	AJ431345.1	fjord ikaite column clone un-c23	0.952	0.952	1	0.8	0.789	0.85	1	1	1	1	1	1	0.952	0.762	0.952	1	1	0.905	1	1	1	1	1	1	1	1	1	1	0.952	0.952		3828.23	3313.7	3061.77	2639.07	2773.92	2643.9	2308.34	2493.66	2321.77	2751.12
Proteobacteria	Alphaproteobacteria	Rhizobiales	Unclassified	sf_1	6756	NA			0.7	0.917	0.7	1	0.9	0.9	1	0.917	1	1	0.917	0.833	1	0.833	0.846	0.909	0.833	0.917	0.769	0.917	0.917	0.769	0.818	0.917	0.917	0.917	0.833	0.917	0.917	0.917		1551.99	841.118	868.169	1449.97	1371.79	1972.91	779.14	974.982	1724.13	959.946
Chloroflexi	Anaerolineae	Chloroflexi-1a	Unclassified	sf_1	490	83666	AB109438.1	mesophilic UASB granular sludge isolate str. YMTK-2 bacterium	0.773	0.727	0.818	0.75	0.783	0.75	0.708	0.792	0.783	0.731	0.92	0.84	0.792	0.783	0.792	0.75	0.783	0.826	0.818	0.826	0.826	0.826	0.783	0.75	0.8	0.792	0.708	0.84	0.88	0.8		2630.83	2348.04	2414.51	1827.12	1631.32	1504.95	2007.51	2176.96	1955.5	2019.6
Proteobacteria	Gammaproteobacteria	Methylococcales	Methylococcaceae	sf_1	9415	NA			0.176	0.125	0.333	0.368	0.444	0.375	0.348	0.375	0.4	0.957	0.833	0.826	0.316	0.211	0.105	0.286	0.333	0.056	0	0.421	0.211	0.143	0.476	0.381	0.923	0.545	0.348	0.15	0.35	0.35		25.8664	21.0759	126.362	40.0599	62.9159	97.4166	57.157	63.7738	74.1464	145.941
Actinobacteria	Actinobacteria	Actinomycetales	Unclassified	sf_3	1900	NA			0.85	0.952	0.85	0.9	0.895	0.944	0.857	0.857	0.9	0.81	0.857	0.905	0.857	0.85	0.857	0.944	0.85	0.85	0.857	0.9	0.905	0.81	0.889	0.85	0.952	0.85	0.81	0.857	0.952	0.857		2643.77	2516.65	2381.78	2821.78	3194.11	3162.85	1862.11	2050.49	2359.28	1807.49
Proteobacteria	Deltaproteobacteria	Syntrophobacterales	Syntrophobacteraceae	sf_1	10251	10760	U49429.1	Syntrophobacter-like isolate	0.8	0.833	0.727	0.909	1	0.818	0.909	0.909	0.727	0.833	0.909	0.923	0.909	0.818	0.818	0.909	0.909	0.727	0.833	1	0.909	0.909	0.9	0.727	0.846	0.909	0.818	0.909	0.909	0.909		511.94	424.391	1324.53	479.742	780.831	801.183	314.865	541.537	837.944	586.483
Firmicutes	Bacilli	Bacillales	Bacillaceae	sf_1	571	14568	Z26922.1	Bacillus caldotenax str. DSM 406	0.938	0.97	0.969	0.806	0.797	0.787	0.97	0.969	0.969	1	1	0.985	0.862	0.79	0.939	0.969	0.794	0.831	0.985	0.954	0.985	0.855	0.738	0.815	1	0.985	0.848	0.985	0.985	0.985		1885.02	2008.91	1509.98	1370.83	1481.89	1480.37	1294.55	1398.7	1278.36	1579.06
Firmicutes	Bacilli	Lactobacillales	Lactobacillaceae	sf_1	3768	15232	Y19167.1	Lactobacillus perolens str. L532	0.929	0.929	0.929	0.857	0.857	1	0.929	0.929	1	1	1	1	0.929	0.929	0.923	0.929	0.929	0.929	1	0.929	0.929	0.857	0.929	1	1	0.929	0.929	0.929	1	0.929		3460.71	2805	2972.68	3196	3023.33	3214.75	2916.01	2647.15	2922.08	3110.99
Cyanobacteria	Cyanobacteria	Nostocales	Unclassified	sf_1	5191	29506	AY038036.1	Cyanospira rippkae str. PCC 9501	1	0.971	0.971	0.971	0.971	0.971	1	1	0.971	1	1	1	0.971	0.971	0.971	0.912	0.941	0.971	0.912	0.853	0.882	0.941	0.909	0.971	1	0.971	0.971	1	1	1		1892.56	2001.25	1864.52	2319.57	2357.1	2339.82	2301.32	1995.36	2127.02	2366.78
Firmicutes	Bacilli	Bacillales	Bacillaceae	sf_1	3688	77521	AY167821.1	Bacillus sp. str. SAFN-006	1	0.918	0.911	0.682	0.692	0.698	0.938	0.979	0.938	1	1	0.98	0.854	0.644	0.857	0.958	0.896	0.75	1	0.872	0.917	0.894	0.636	0.854	1	1	0.896	1	1	1		1817.12	1905.45	1668.16	1443.13	1749.29	1379.31	1221.35	1325.2	1208.68	1434.93
Bacteroidetes	Flavobacteria	Flavobacteriales	Flavobacteriaceae	sf_1	5757	51701	AF354616.1	marine clone Arctic96B-24	0.444	0.875	0.875	0.8	0.867	0.933	0.692	0.714	0.833	0.643	0.692	0.769	0.692	0.727	0.583	0.778	0.727	0.636	0.667	0.8	0.8	0.667	0.583	0.583	0.714	0.538	0.462	0.571	0.769	0.75		143.343	694.545	487.266	952.645	750.497	1100.72	495.36	417.232	860.277	286.443
Actinobacteria	Actinobacteria	Actinomycetales	Actinomycetaceae	sf_1	2049	24783	AJ234059.1	Arcanobacterium haemolyticum str. CIP 103370	0.892	0.923	0.919	0.763	0.757	0.737	0.838	0.842	0.789	0.868	0.842	0.872	0.769	0.806	0.795	0.917	0.886	0.744	0.897	0.865	0.949	0.861	0.771	0.838	0.925	0.811	0.763	0.947	0.949	0.923		1629.59	1761.75	1667.25	1875.98	1915.56	1821.78	1367.76	1446.26	1672.31	1210.13
Actinobacteria	Actinobacteria	Actinomycetales	Streptomycetaceae	sf_1	1544	18850	AB022872.1	Kitasatospora cystarginea str. IFO14836T	0.857	1	0.867	1	0.929	0.929	1	1	1	1	0.933	0.867	1	1	1	1	0.933	0.933	0.929	0.923	0.929	0.933	1	1	1	1	0.867	1	1	1		1342.9	1206.11	1260.89	1124.61	917.898	1139.87	831.283	960.93	1351.61	1092.29
Actinobacteria	Actinobacteria	Actinomycetales	Thermomonosporaceae	sf_1	1669	28823	AF223348.1	Pseudonocardiaceae str. PA123	0.766	0.941	0.864	0.91	0.894	0.94	0.855	0.929	0.912	0.943	0.971	0.942	0.929	0.871	0.783	0.833	0.939	0.758	0.809	0.821	0.882	0.821	0.8	0.788	0.943	0.941	0.843	0.957	0.971	0.943		2158.77	1821.15	1940.88	1905.29	1921.18	1845.45	1813.98	1773.78	1903.69	1750.38
Firmicutes	Mollicutes	Anaeroplasmatales	Erysipelotrichaceae	sf_3	768	NA			0.962	1	1	0.846	0.88	0.846	0.96	0.96	0.96	1	1	1	0.923	0.84	0.96	0.96	0.96	0.96	1	1	1	1	0.92	0.96	0.962	1	0.923	1	1	1		4223.77	3575.23	3429.04	2879.43	3187.36	2929.78	3283.02	3208.15	3133.8	3440.94
Firmicutes	Clostridia	Clostridiales	Peptococc/Acidaminococc	sf_11	39	63299	AF523919.1	forested wetland clone RCP2-71	1	1	1	0.875	0.8	1	1	1	1	1	1	1	1	0.812	0.812	0.938	1	1	1	1	1	1	1	1	1	1	1	1	1	1		3362.64	2994.69	2525.42	1867.18	1917.81	2117.67	2266.22	2512.04	2166.33	2529.04
Firmicutes	Bacilli	Bacillales	Staphylococcaceae	sf_1	3794	NA			0.979	0.912	0.918	0.805	0.789	0.81	0.901	0.896	0.899	0.945	0.941	0.93	0.867	0.767	0.828	0.908	0.854	0.785	0.924	0.899	0.939	0.86	0.776	0.862	0.952	0.908	0.874	0.912	0.934	0.923		2542.46	2267.57	1901.79	1951.21	2032.41	1985.66	1785.9	1788.91	1839.37	1913.55
Proteobacteria	Gammaproteobacteria	Enterobacteriales	Enterobacteriaceae	sf_1	9496	NA			0.959	0.964	0.974	0.881	0.822	0.818	0.974	0.969	0.969	0.974	0.979	0.974	0.979	0.953	0.963	0.989	0.947	0.927	0.99	0.979	0.995	0.979	0.921	0.984	0.974	0.99	0.979	0.99	0.995	1		4608.54	3270.59	2149.06	1917.99	1949.27	1793.56	2353.46	2478.53	1990.34	2491.87
Firmicutes	Clostridia	Clostridiales	Clostridiaceae	sf_12	3077	14212	X76750.1	Clostridium glycolicum str. DSM 1288	1	1	1	0.927	0.9	0.925	0.929	0.929	0.951	0.929	0.952	0.952	0.902	0.923	0.952	0.951	0.927	0.952	0.952	1	0.976	0.951	0.951	0.952	0.976	0.951	0.929	0.927	0.905	0.905		2607.12	2880.69	2639.05	1880.86	1873.99	2089.45	1853.09	1886.19	1727.7	2217.21
Firmicutes	Mollicutes	Acholeplasmatales	Acholeplasmataceae	sf_1	3955	64303	AF521672.1	Weeping tea tree witches'-broom phytoplasma tree	0.875	1	0.867	0.933	0.933	0.8	1	1	0.938	1	1	1	1	1	1	1	1	1	1	1	1	1	1	1	1	1	1	1	1	1		2700.89	2428.51	2909.96	2807.13	2719.99	2829.63	2745.54	2418	2332.49	2723.93
Firmicutes	Mollicutes	Anaeroplasmatales	Erysipelotrichaceae	sf_3	3981	60757	AY128088.1	phototrophic sludge clone PSB-M-3	0.971	1	0.972	0.917	0.943	0.889	1	1	0.972	1	1	1	0.972	0.889	0.972	1	1	1	0.972	0.972	1	0.972	0.972	1	1	1	1	1	1	1		3829.31	3214.07	3641.77	2963.46	3289.6	2954.36	2923.03	2797.4	2774.68	3170.81
Bacteroidetes	Bacteroidetes	Bacteroidales	Rikenellaceae	sf_5	5889	77794	AB088945.1	termite gut homogenate clone Rs-F73 bacterium	0.909	0.909	0.909	0.818	0.9	1	0.9	0.818	0.818	0.909	0.909	0.818	0.9	0.9	0.818	0.727	0.818	0.818	0.727	0.8	0.727	0.818	0.9	0.818	0.909	0.9	0.727	1	1	1		4135.4	3031.09	3685.4	3211.63	3600.81	3127.35	3906.73	3678.34	3075.74	3126.4
Firmicutes	Bacilli	Bacillales	Staphylococcaceae	sf_1	3284	NA			0.976	0.934	0.96	0.775	0.791	0.788	0.934	0.934	0.933	0.959	0.976	0.959	0.917	0.783	0.908	0.9	0.858	0.832	0.959	0.943	0.975	0.892	0.788	0.893	0.992	0.943	0.884	0.943	0.975	0.959		2911.05	2668.97	2329.97	2297.1	2444.73	2256.06	2151.91	2166.15	2148.46	2224.46
Verrucomicrobia	Verrucomicrobiae	Verrucomicrobiales	Verrucomicrobiaceae	sf_6	219	52421	AJ401108.1	Elbe river clone DEV009	0.412	0.556	0.467	0.714	0.667	0.786	0.588	0.556	0.533	0.588	0.647	0.556	0.6	0.5	0.235	0.5	0.588	0.444	0.375	0.438	0.389	0.588	0.529	0.5	0.842	0.647	0.5	0.5	0.944	0.471		551.817	558.51	663.627	775.795	754.991	885.854	370.016	363.186	518.132	458.671
Bacteroidetes	Bacteroidetes	Bacteroidales	Porphyromonadaceae	sf_1	5651	78342	AB088939.1	termite gut homogenate clone Rs-F14 bacterium	0.714	0.929	0.786	0.923	0.769	0.769	0.929	0.929	0.929	0.929	0.929	0.929	0.857	0.846	0.929	0.857	0.857	0.857	0.929	0.929	0.929	0.929	0.786	0.929	1	0.929	0.857	0.786	0.929	0.857		2655.62	2366.24	2311.78	2710.4	2759.31	2565.61	2803.7	2793.08	2485.24	2391.25
Firmicutes	Symbiobacteria	Symbiobacterales	Unclassified	sf_1	77	27433	AF391988.1	thermal soil clone YNPFFP9	1	1	0.909	1	0.9	0.909	1	1	1	1	1	1	1	0.909	0.909	1	1	0.909	1	1	1	1	1	1	1	0.909	0.909	0.909	1	1		2267.62	2631.61	2292.69	2437.79	2448.1	2571.07	1867.13	1792.15	2127.91	2207.24
Proteobacteria	Betaproteobacteria	Methylophilales	Methylophilaceae	sf_1	7892	108436	AB193725.1	Methylophilus leisingeri str. DSM 6813	0.857	0.955	0.957	1	1	1	1	1	0.96	1	1	1	0.958	1	1	1	1	0.96	0.96	1	1	0.958	1	0.92	1	1	0.96	1	0.96	0.96		3101.82	2461.09	2428.15	2296.12	2052.63	2560.14	2979.18	2662.29	2812.2	2885.28
Bacteroidetes	Bacteroidetes	Bacteroidales	Unclassified	sf_15	5481	77721	AJ535258.1	marine sediment above hydrate ridge clone Hyd89-72 bacterium	1	1	0.917	0.917	1	1	0.917	0.917	1	1	0.917	0.917	1	1	0.917	0.909	0.917	1	0.917	0.917	0.917	0.917	0.917	1	0.917	0.917	0.917	0.917	0.917	0.917		4312.15	3603.97	3738.13	3576.08	3989.54	3458.74	3932.8	3889.12	3568.85	4002.04
Firmicutes	Bacilli	Bacillales	Bacillaceae	sf_1	3655	NA			0.838	0.835	0.806	0.635	0.643	0.683	0.802	0.804	0.816	0.848	0.837	0.854	0.813	0.645	0.791	0.824	0.758	0.734	0.868	0.765	0.807	0.759	0.678	0.767	0.919	0.808	0.732	0.875	0.913	0.882		1590.79	1785.7	1565.43	1216.45	1235.85	1286.45	1167.21	1201.97	1174.73	1416.8
Bacteroidetes	Sphingobacteria	Sphingobacteriales	Flexibacteraceae	sf_19	5682	66996	AB058919.1	Reichenbachia agariperforans str. KMM 3525	0.636	0.9	0.9	0.833	0.833	0.917	0.833	0.833	0.833	0.909	0.818	0.909	0.917	0.75	0.75	0.9	0.818	0.818	0.833	0.818	0.9	0.818	0.818	0.818	0.833	0.818	0.75	0.818	1	0.818		1624.2	1733.97	2000.88	1983.46	1827.93	1922.84	2404.6	2603.92	2342.31	2279.76
Proteobacteria	Gammaproteobacteria	Pseudomonadales	Moraxellaceae	sf_3	8366	100627	AJ609556.1	Psychrobacter frigidicola str. DSM 12411	0.882	1	1	0.943	0.971	0.943	0.971	0.971	1	0.971	1	1	0.971	0.914	0.971	0.971	1	1	1	1	1	1	0.971	1	1	1	1	0.971	1	0.971		3632.08	3336.69	2929.05	2948.8	3154.78	2803.23	2675.35	2732.54	2158.29	2906.13
Firmicutes	Bacilli	Lactobacillales	Leuconostocaceae	sf_1	3497	63449	AY035892.1	Weissella koreensis S-5673	0.955	0.957	0.956	0.884	0.854	0.902	0.889	0.952	0.976	0.913	0.956	0.933	0.953	0.881	0.93	0.935	0.902	0.86	0.979	0.889	0.979	0.95	0.805	0.822	1	0.976	0.822	0.936	0.938	0.939		2812.98	2786.8	2650.87	2456.36	2525.62	2163.19	2127.84	2287.21	2042.15	2194.55
Firmicutes	Clostridia	Clostridiales	Peptococc/Acidaminococc	sf_11	709	13816	AB017195.1	Selenomonas ruminantium str.S20	0.965	0.965	0.982	0.929	0.87	0.964	0.982	0.965	0.982	0.982	0.982	0.982	0.982	0.911	0.909	0.982	0.982	0.964	0.982	0.965	0.982	0.982	0.911	0.965	0.982	0.982	0.965	0.982	0.982	0.982		3886.43	3505.3	3270.86	2504.23	2695.27	2267.89	3027.31	2955.21	2478.99	2948.73
AD3	Unclassified	Unclassified	Unclassified	sf_1	2338	78943	AJ536867.1	uranium mining waste pile soil clone JG30-KF-C12	0.962	1	0.885	0.962	0.923	0.923	0.962	0.962	0.962	0.962	0.962	0.962	0.962	0.923	0.962	0.92	0.92	0.96	1	1	0.962	0.96	0.96	1	1	0.923	0.923	0.962	1	0.962		3024.22	2808.84	2216.33	3020.13	2839.08	2668.49	2581.09	2287.21	2284.25	2516.35
Firmicutes	Bacilli	Lactobacillales	Lactobacillaceae	sf_1	3366	84709	AY255802.1	Lactobacillus saerimneri str. GDA154 LMG 22087 DSM 16049 (T); CCUG 48462 (T)	0.905	0.87	0.909	0.818	0.905	0.905	0.783	0.864	0.905	0.864	0.909	0.87	0.826	0.952	0.826	0.87	0.857	0.905	0.87	0.857	0.87	0.818	0.857	0.783	0.87	0.909	0.818	0.864	0.955	0.864		2871.18	2170.81	2383.6	2072.37	2166.1	2348.92	2088.74	2096.97	2182.41	2371.31
Chloroflexi	Anaerolineae	Unclassified	Unclassified	sf_9	205	76756	AJ532729.1	uranium mining waste pile clone JG34-KF-221	1	1	1	1	1	1	1	0.909	1	1	1	0.909	1	1	1	1	1	1	1	1	1	1	1	1	1	0.909	1	1	1	1		3068.41	2665.14	2706.32	1938.51	1681.88	2669.4	2345.44	2195.33	2512.94	2277.95
Actinobacteria	Actinobacteria	Actinomycetales	Nocardiaceae	sf_1	1769	82059	AF430064.1	Nocardia sp. str. DSM 46067	0.618	0.902	0.763	0.905	0.8	0.875	0.854	0.833	0.854	0.881	0.929	0.814	0.929	0.833	0.714	0.778	0.821	0.632	0.707	0.737	0.825	0.75	0.684	0.658	0.93	0.95	0.78	0.881	0.952	0.976		1403.25	1345.98	1509.07	1235.02	1266.18	1358.37	870.39	917.694	1173.84	1051.5
Proteobacteria	Gammaproteobacteria	Enterobacteriales	Enterobacteriaceae	sf_1	8885	85088	AB089246.1	Morganella morganii str. AP28	0.961	0.99	0.95	0.947	0.856	0.9	0.971	0.971	0.96	0.98	0.98	0.981	0.97	0.98	0.97	0.971	0.97	0.951	0.99	0.971	0.99	0.98	0.921	0.99	0.951	0.981	0.971	0.99	0.981	0.99		4243.17	3352.98	2008.15	1309.28	1170.69	1178.1	2197.03	2434.21	1742.89	2364.97
Firmicutes	Clostridia	Clostridiales	Clostridiaceae	sf_12	4607	16123	X68188.1	Clostridium novyi str. NCTC538	0.923	0.973	0.951	0.929	0.905	0.927	0.962	0.962	0.957	0.952	0.962	0.968	0.941	0.918	0.93	0.93	0.957	0.957	0.963	0.984	0.963	0.973	0.913	0.963	0.974	0.968	0.952	0.957	0.973	0.941		2705.2	2566.46	2329.97	1905.29	1911.07	1977.47	2135.87	2101.29	1936.74	2140.16
Proteobacteria	Gammaproteobacteria	Enterobacteriales	Enterobacteriaceae	sf_1	8700	80483	AF489427.1	Baumannia cicadellinicola	1	1	1	0.857	0.923	0.923	1	1	1	1	1	1	1	0.923	0.923	1	1	1	1	1	1	1	0.923	1	1	1	1	1	1	1		3103.97	2417.02	1175.44	921.379	939.244	1137.13	1463.02	1449.5	1451.66	1698.72
Cyanobacteria	Cyanobacteria	Nostocales	Unclassified	sf_1	5047	23978	AF247573.1	Anabaena circinalis str. AWQC150A	1	0.971	0.971	0.971	0.971	0.971	1	1	0.971	1	1	1	0.971	0.971	0.971	0.914	0.943	0.971	0.914	0.857	0.886	0.943	0.912	0.971	1	0.971	0.971	1	1	1		2062.85	2111.42	1986.33	2557.97	2546.97	2491.86	2473.79	2162.9	2247.62	2540.82
Firmicutes	Bacilli	Lactobacillales	Streptococcaceae	sf_1	3685	15563	AF003931.1	Streptococcus gordonii str. ATCC 10558	1	1	1	0.917	0.917	0.917	0.917	1	0.917	0.923	1	1	1	1	0.917	1	1	1	0.923	1	1	1	0.917	1	1	1	1	1	0.923	0.923		3507.06	3534.04	3390.86	3193.07	3658.11	2751.34	3191.76	2949.81	2562.07	2713.05
Firmicutes	Clostridia	Clostridiales	Peptococc/Acidaminococc	sf_11	1036	60600	AF407698.1	Great Artesian Basin clone G07	0.966	0.967	0.867	0.778	0.769	0.808	0.929	0.929	0.885	0.966	0.966	1	0.889	0.769	0.75	0.857	0.815	0.767	1	1	0.931	0.897	0.828	0.833	1	0.933	0.933	1	1	1		2786.03	2537.72	2159.06	1951.21	2043.64	1918.29	1976.43	2018.06	1823.29	2054.96
Proteobacteria	Gammaproteobacteria	Pasteurellales	Pasteurellaceae	sf_1	9237	NA			0.957	0.957	1	1	1	1	0.957	0.957	0.957	0.957	0.957	0.957	0.957	0.913	0.957	0.957	0.957	0.957	0.957	0.957	0.957	0.957	0.87	0.957	0.957	0.957	1	1	0.957	1		4787.45	3309.87	3243.59	3192.09	3127.82	2854.21	3784.39	3863.18	2932.8	4041.93
Firmicutes	Bacilli	Bacillales	Paenibacillaceae	sf_1	3630	NA			0.909	1	1	0.8	0.727	0.9	1	1	0.909	1	1	0.909	0.818	0.9	0.818	1	0.818	0.9	0.909	1	1	0.909	0.8	0.9	0.909	1	1	1	1	1		1894.72	3051.21	2865.41	2378.19	2178.46	2689.43	2196.03	2275.32	2075.21	2447.46
Cyanobacteria	Cyanobacteria	Chloroplasts	Chloroplasts	sf_5	5111	NA			0.743	0.886	0.676	0.949	0.9	0.923	0.895	0.816	0.821	0.974	0.789	0.886	0.872	0.895	0.8	0.725	0.737	0.718	0.861	0.714	0.861	0.737	0.692	0.769	0.892	0.861	0.694	0.8	0.857	0.886		1021.72	1437.95	1501.8	1576.02	1448.19	1799.93	1421.9	1287.37	1281.93	1766.7
Cyanobacteria	Cyanobacteria	Chloroplasts	Chloroplasts	sf_5	4983	NA			0.743	0.886	0.676	0.949	0.9	0.923	0.895	0.816	0.821	0.974	0.789	0.886	0.872	0.895	0.8	0.725	0.737	0.718	0.861	0.714	0.861	0.737	0.692	0.769	0.892	0.861	0.694	0.8	0.857	0.886		1021.72	1437.95	1502.71	1576.02	1448.19	1811.77	1422.91	1287.37	1281.93	1766.7
Firmicutes	Bacilli	Bacillales	Bacillaceae	sf_1	3612	83619	AB042060.1	Bacillus schlegelii str. ATCC 43741T	0.917	0.917	0.917	1	1	1	1	1	1	0.917	0.917	0.917	1	1	0.917	1	1	0.909	0.917	1	0.917	1	1	0.917	1	1	0.917	1	1	1		2999.43	2579.88	2703.6	2697.69	3009.85	3192.9	2110.8	2291.53	2559.39	2541.73
Actinobacteria	Actinobacteria	Actinomycetales	Micrococcaceae	sf_1	2020	58300	AF543278.1	Rothia dentocariosa str. ChDC B200	0.632	0.773	0.8	0.6	0.667	0.556	0.5	0.524	0.611	0.773	0.864	0.682	0.545	0.588	0.5	0.5	0.619	0.524	0.909	0.818	0.909	0.526	0.579	0.545	0.818	0.857	0.5	0.905	0.864	0.952		2803.28	2233.08	2528.15	2658.61	2570.56	2407.19	2522.93	2507.72	2636.22	2295.17
Proteobacteria	Betaproteobacteria	Burkholderiales	Ralstoniaceae	sf_1	7859	86040	AJ550652.1	Polynucleobacter sp MWH-MoK1	0.7	0.8	0.8	0.8	0.7	0.778	1	1	1	1	1	1	1	1	1	1	1	1	0.818	0.818	0.818	1	1	1	1	0.818	0.818	0.8	0.818	0.818		2042.37	2302.06	2456.33	2101.68	1276.29	2111.3	2572.06	2483.94	2469.16	2460.15
Cyanobacteria	Cyanobacteria	Phormidium	Unclassified	sf_1	4978	70492	AB058225.1	LPP-group isolate str. MBIC10087	0.828	0.963	0.923	0.893	0.893	0.893	0.929	0.893	0.862	0.929	0.929	0.862	0.897	0.862	0.862	0.862	0.862	0.857	0.828	0.893	0.893	0.897	0.862	0.893	0.931	0.828	0.926	0.897	0.897	0.897		1674.85	2184.23	1953.61	2328.36	2396.42	2389.89	1802.95	1718.65	1766.11	1699.62
Proteobacteria	Alphaproteobacteria	Rhizobiales	Bradyrhizobiaceae	sf_1	6824	NA			0.364	0.417	0.6	0.615	0.667	0.909	0.267	0.583	0.636	0.385	0.308	0.308	0.667	0.636	0.462	0.545	0.333	0.214	0.333	0.357	0.267	0.333	0.357	0.333	0.688	0.583	0.286	0.5	0.8	0.786		143.343	346.794	266.36	920.401	1036.99	1164.45	158.435	305.898	444.878	229.336
Spirochaetes	Spirochaetes	Spirochaetales	Spirochaetaceae	sf_2	6493	4182	U42284.1	Borrelia anserina str. ES-1	0.833	0.897	0.833	0.931	0.867	0.9	0.828	0.897	0.828	0.8	0.9	0.871	0.793	0.828	0.833	0.828	0.867	0.839	0.833	0.8	0.833	0.8	0.833	0.839	0.933	0.9	0.833	0.862	0.967	0.931		2980.03	2500.36	2858.14	3090.48	3230.06	2652.1	2702.42	2472.05	2416.46	2529.94
Proteobacteria	Alphaproteobacteria	Rhodobacterales	Rhodobacteraceae	sf_1	7499	NA			0.5	0.5	0.571	1	1	1	0.706	0.722	0.667	0.765	0.667	0.722	0.562	0.5	0.632	0.5	0.562	0.556	0.556	0.529	0.5	0.588	0.471	0.529	0.722	0.588	0.471	0.706	0.706	0.75		392.308	362.122	667.263	1719.65	1747.04	1714.35	531.459	519.919	896.903	533.908
Firmicutes	Symbiobacteria	Symbiobacterales	Unclassified	sf_1	2388	25424	AF465653.1	G+C Gram-positive clone YNPRH70A	1	1	0.955	0.952	0.905	0.909	1	1	1	1	1	1	1	0.955	0.955	1	1	0.955	1	1	1	1	1	1	1	0.955	0.955	0.955	1	1		3027.45	3196.82	3420.86	2860.87	2667.18	2956.18	2831.78	3200.58	3047.15	3311.32
Proteobacteria	Betaproteobacteria	Procabacteriales	Procabacteriaceae	sf_1	8136	52040	AF177426.1	Acanthamoeba sp. UWC6 symbiont	0.884	0.978	1	0.909	0.93	0.909	0.867	0.886	0.864	0.957	0.957	0.957	0.837	0.837	0.818	0.891	0.911	0.848	0.978	0.957	0.978	0.913	0.932	0.935	0.978	0.978	0.87	0.978	0.978	0.978		2427.13	2761.9	3141.77	2039.15	1633.57	2125.87	2734.51	2799.56	2515.62	2732.99
Proteobacteria	Gammaproteobacteria	Enterobacteriales	Enterobacteriaceae	sf_1	8607	63939	AF476100.1	Amonostherium lichtensioides symbiont	0.882	0.882	0.941	0.941	0.882	0.938	0.882	0.882	0.941	0.882	0.882	0.941	0.882	0.941	0.941	1	1	1	0.882	0.882	1	0.882	1	1	0.941	0.941	1	0.941	0.941	0.941		3595.44	2856.74	2864.5	2383.08	2389.68	2501.88	2899.96	2678.5	2435.22	3035.75
Proteobacteria	Alphaproteobacteria	Rickettsiales	Anaplasmataceae	sf_3	7091	6042	AF156784.1	Anaplasma platys str. Gzh981	0.682	0.905	0.714	0.739	0.583	0.68	0.864	0.792	0.783	0.826	0.783	0.76	0.773	0.727	0.583	0.826	0.818	0.783	0.625	0.818	0.783	0.818	0.739	0.818	0.826	0.826	0.81	0.739	0.87	0.826		1528.28	1338.32	1432.71	892.066	761.732	1218.16	953.619	978.225	1131.85	1290.81
Firmicutes	Clostridia	Clostridiales	Peptostreptococcaceae	sf_5	3182	77831	AB088970.1	termite gut homogenate clone Rs-Q64 bacterium	0.946	0.964	0.946	0.857	0.83	0.945	0.927	0.929	0.944	0.946	0.946	0.964	0.945	0.852	0.849	0.927	0.926	0.926	0.946	0.981	0.945	0.945	0.821	0.927	1	0.964	0.946	0.964	0.982	0.982		3248.39	3204.49	3110.86	2293.19	2004.32	2107.66	2665.32	2485.02	2152.03	2563.48
Firmicutes	Clostridia	Clostridiales	Clostridiaceae	sf_12	4575	16182	X68451.1	Clostridium subterminale str. NCIMB 10746	0.927	0.973	0.91	0.835	0.845	0.861	0.926	0.922	0.944	0.972	0.954	0.963	0.908	0.849	0.866	0.944	0.908	0.903	0.955	0.986	0.95	0.936	0.856	0.936	0.982	0.95	0.917	0.95	0.972	0.95		2539.22	2427.56	2062.7	1706.94	1727.94	1774.44	1916.26	1932.67	1751.82	1998.76
Gemmatimonadetes	Unclassified	Unclassified	Unclassified	sf_5	317	81623	AY218696.1	penguin droppings sediments clone KD8-87	1	0.923	1	1	0.929	0.929	1	1	1	1	0.929	1	0.929	1	0.923	1	0.929	1	1	0.923	1	1	0.929	1	0.857	1	0.929	1	0.929	1		3835.78	3413.33	4077.21	3298.59	2591.91	3043.59	3615.93	4235.01	3543.84	3984.82
Bacteroidetes	Sphingobacteria	Sphingobacteriales	Crenotrichaceae	sf_11	5491	50373	AJ290025.1	Austria: Lake Gossenkoellesee clone GKS2-106 GKS2-106	0.667	0.636	0.7	0.778	0.667	0.667	0.727	0.727	0.7	0.8	0.727	0.909	0.778	0.778	0.727	0.8	0.8	0.636	0.818	0.727	0.636	0.727	0.6	0.818	0.818	0.8	0.727	0.8	0.8	0.818		317.942	351.584	485.448	170.988	129.202	251.28	415.14	450.74	594.065	571.073
Bacteroidetes	Flavobacteria	Flavobacteriales	Flavobacteriaceae	sf_1	6079	78016	AB074611.1	synonym: CFB group clone APe4_42	0.588	0.722	0.667	0.824	0.824	0.882	0.667	0.611	0.647	0.722	0.722	0.611	0.722	0.611	0.647	0.611	0.647	0.667	0.944	0.889	0.941	0.611	0.765	0.706	0.889	0.889	0.944	0.833	0.944	0.944		2112.43	2530.06	2864.5	3645.45	3446.89	2805.96	2972.16	2512.04	2421.82	2628.75
Bacteroidetes	Sphingobacteria	Sphingobacteriales	Unclassified	sf_3	5740	83725	AY250875.1	lichen-dominated Antarctic cryptoendolithic community clone FBP292 bacterium	0.8	0.947	0.85	0.895	0.895	0.895	0.81	0.81	0.81	0.81	0.85	0.95	0.81	0.81	0.85	0.895	0.842	0.8	0.81	0.8	0.762	0.81	0.833	0.8	0.864	0.9	0.8	0.762	0.857	0.81		1445.29	1520.34	1612.7	1824.19	1661.65	1880.96	1673.6	1679.74	1741.1	1519.24
Firmicutes	Mollicutes	Mycoplasmatales	Mycoplasmataceae	sf_1	3929	79153	AY191226.1	Mycoplasma gypsbengalensis str. Gb-V33	1	1	1	1	1	1	1	1	1	1	1	1	1	1	1	1	0.957	1	1	1	1	1	1	1	1	1	1	1	1	1		3647.17	3606.85	4405.39	4601.03	4693.98	3840.22	3887.68	3567.01	3310.68	3965.78
Firmicutes	Bacilli	Bacillales	Halobacillaceae	sf_1	3758	63143	AY121435.1	Amphibacillus sp. str. YIM-kkny10	0.897	0.929	0.951	0.737	0.649	0.718	0.878	0.927	0.902	0.929	0.952	0.878	0.786	0.75	0.833	0.929	0.854	0.833	0.952	0.952	0.976	0.902	0.8	0.854	0.951	0.952	0.878	0.952	0.952	0.976		1279.31	1677.45	1179.07	891.089	933.627	1131.67	814.236	927.422	906.73	1190.19
Bacteroidetes	Flavobacteria	Flavobacteriales	Flavobacteriaceae	sf_1	6093	17872	AJ400340.1	f cytometric sorted marine sample subpopulation 1 clone ZD0203 bacterium	0.417	0.727	0.833	0.867	0.857	0.857	0.733	0.714	0.933	0.818	0.667	0.769	1	0.933	0.8	0.714	0.833	0.643	0.636	0.5	0.727	0.833	0.769	0.714	0.75	0.667	0.667	0.818	0.75	0.75		60.355	733.823	700.899	1563.31	1185.29	1450.32	969.663	913.37	1713.41	627.274
Proteobacteria	Gammaproteobacteria	Enterobacteriales	Enterobacteriaceae	sf_1	8473	10302	M59155.1	Hafnia alvei	0.974	0.974	0.956	0.945	0.857	0.876	0.991	0.982	0.982	0.982	0.991	0.991	0.982	0.991	0.991	0.991	0.991	0.974	0.982	0.974	1	0.982	0.946	1	0.974	0.991	0.974	1	0.991	1		4243.17	3231.31	2013.61	944.828	784.202	996.016	2155.92	2393.14	1764.33	2371.31
Proteobacteria	Betaproteobacteria	Methylophilales	Methylophilaceae	sf_1	8017	NA			0.5	0.75	0.684	0.765	0.706	0.706	1	0.737	0.737	0.833	0.789	0.842	0.667	0.562	0.611	0.556	0.579	0.647	0.647	0.5	0.579	0.632	0.474	0.632	0.789	0.842	0.632	0.684	0.833	0.722		816.949	770.227	597.264	455.315	425.806	664.618	954.621	633.414	634.264	751.459
Firmicutes	Clostridia	Clostridiales	Lachnospiraceae	sf_5	4510	77781	AB089034.1	termite gut homogenate clone Rs-Q53 bacterium	0.913	0.957	0.957	0.957	0.913	0.913	0.957	0.957	0.957	0.957	0.957	0.957	0.957	0.957	0.913	0.957	0.957	0.957	0.957	0.957	0.957	0.957	0.957	0.957	0.957	0.957	0.957	0.957	0.957	0.957		3795.9	3372.14	3146.32	1389.4	1362.8	1466.71	2964.14	3060.06	2304.79	3037.56
Firmicutes	Mollicutes	Anaeroplasmatales	Erysipelotrichaceae	sf_3	144	15720	L34616.1	Eubacterium cylindroides	1	0.974	0.973	0.917	0.944	0.917	0.919	0.944	0.917	0.972	1	0.919	0.917	0.944	0.865	0.917	0.895	0.892	0.892	0.892	0.919	0.892	0.919	0.892	0.972	0.946	0.944	0.972	0.944	0.972		3167.56	2736.99	3172.68	3074.84	3249.16	2952.54	2576.07	2496.91	2461.12	2813.67
Actinobacteria	Actinobacteria	Coriobacteriales	Coriobacteriaceae	sf_1	1294	NA			0.857	0.818	0.95	0.9	0.9	0.857	0.727	0.773	0.9	0.95	0.905	0.773	0.857	0.9	0.714	0.81	0.857	0.727	0.667	0.95	0.818	0.818	0.947	0.85	0.81	0.857	0.773	0.905	0.905	0.905		998.014	801.841	1309.98	1050.35	1205.51	1183.57	678.864	683.136	1007.68	951.788
Bacteroidetes	Sphingobacteria	Sphingobacteriales	Sphingobacteriaceae	sf_1	5492	68384	AF492000.1	Sphingobacterium sp. str. HC-6155	1	0.917	1	0.917	0.917	1	1	1	1	1	1	1	1	1	0.917	1	1	0.917	0.917	0.917	0.833	0.917	0.917	0.917	1	1	1	1	1	1		2276.25	2233.08	2572.69	2776.84	2818.86	3004.44	3653.03	3707.53	3550.09	3137.27
Proteobacteria	Gammaproteobacteria	Pasteurellales	Pasteurellaceae	sf_1	8614	21084	AF359941.1	Acidithiobacillus thiooxidans str. KCTC 8928P	0.923	0.846	0.917	0.818	0.818	0.818	0.818	0.75	1	0.818	0.818	0.818	0.727	0.636	0.818	0.909	0.818	0.833	0.846	1	0.846	0.9	0.636	0.75	0.692	0.909	0.75	0.818	0.75	0.818		3019.91	1522.25	1459.07	2398.71	1572.9	1639.69	2104.78	1874.3	2056.45	2047.7
Firmicutes	Bacilli	Bacillales	Bacillaceae	sf_1	3661	78617	AB094471.1	Bacillus sp. str. 2216.25.2	0.984	0.939	0.923	0.75	0.696	0.729	0.985	0.985	0.984	1	1	1	0.939	0.836	0.969	0.985	0.954	0.877	1	0.954	1	0.908	0.766	0.924	1	0.97	0.985	0.97	0.985	0.97		1781.55	2077.89	1680.88	1383.53	1415.61	1342.89	1275.5	1294.93	1403.42	1606.26
Firmicutes	Catabacter	Unclassified	Unclassified	sf_4	3023	83754	AY197417.1	Guaymas Basin hydrothermal vent sediments clone B04R016	0.944	0.944	0.889	0.867	0.857	0.933	0.889	0.889	0.875	0.944	0.944	1	0.938	0.867	0.875	0.882	0.833	0.889	0.944	0.889	0.889	0.889	0.938	0.944	1	0.833	0.889	0.889	0.944	0.889		1910.88	2243.62	1792.7	1591.65	1311.12	1392.06	1349.71	1499.22	1819.71	1534.65
Proteobacteria	Betaproteobacteria	Burkholderiales	Burkholderiaceae	sf_1	7771	7229	AB021374.1	Burkholderia glathei str. ATCC 29195T	1	1	1	0.985	0.952	0.922	0.985	1	1	0.985	1	1	0.985	0.985	0.985	1	1	1	1	1	1	1	0.985	1	1	1	1	1	1	1		3053.32	2629.69	2854.5	1632.69	1389.77	1813.59	2734.51	2654.72	2403.95	2751.12
Firmicutes	Clostridia	Clostridiales	Peptostreptococcaceae	sf_5	2722	78236	AB088987.2	termite gut homogenate clone Rs-E61 bacterium	0.967	0.968	0.968	0.9	0.759	0.9	0.968	0.968	0.968	1	1	1	0.935	0.862	0.903	0.967	0.935	0.935	0.968	0.968	0.968	0.968	0.967	1	1	1	1	1	1	1		2728.91	2763.81	2638.14	2099.73	2095.32	2033	2025.56	1909.97	1739.31	2068.55
Actinobacteria	Actinobacteria	Actinomycetales	Corynebacteriaceae	sf_1	1517	13347	X84446.1	Corynebacterium xerosis str. DSM 20743	1	0.909	0.909	0.909	0.909	0.909	0.909	0.909	0.909	0.909	0.909	1	0.909	0.909	1	0.909	0.909	0.909	1	0.909	1	0.909	0.909	0.909	0.909	0.909	0.818	0.909	1	0.909		709.172	743.403	846.351	1253.58	950.479	1132.58	407.118	475.601	1125.6	457.765
Proteobacteria	Betaproteobacteria	Burkholderiales	Comamonadaceae	sf_1	7754	21007	AJ318129.1	Waste-gas biofilter clone BIfdi44	0.636	0.941	0.889	0.812	0.688	0.533	0.941	0.889	0.882	0.944	0.944	0.944	0.824	0.933	0.875	1	0.824	0.941	0.944	0.944	1	0.882	0.938	0.941	1	0.944	1	1	1	0.944		132.566	2085.55	2187.24	292.144	112.35	153.864	1257.45	1508.95	1592.81	1413.18
Unclassified	Unclassified	Unclassified	Unclassified	sf_148	5022	63818	AF454327.1	plastid clone ML310M-37	0.818	0.917	1	1	1	1	0.923	1	1	0.923	1	1	1	0.923	1	1	1	1	0.846	0.846	0.846	1	1	1	1	0.923	0.917	1	1	1		2630.83	1824.98	2215.42	3278.08	3261.52	2917.95	2785.65	2513.12	2588.87	2561.67
Firmicutes	Bacilli	Bacillales	Bacillaceae	sf_1	429	14646	X60616.1	Bacillus firmus str. NCIMB 9366	0.837	0.792	0.714	0.5	0.5	0.538	0.848	0.809	0.739	0.915	0.872	0.957	0.854	0.524	0.809	0.804	0.809	0.609	0.98	0.659	0.771	0.717	0.442	0.761	0.959	0.848	0.723	0.896	0.917	0.872		785.693	1033.67	791.807	458.247	423.559	587.231	384.055	432.365	488.652	675.316
Actinobacteria	Actinobacteria	Actinomycetales	Streptosporangiaceae	sf_1	1505	12147	U48986.1	Microbispora rosea subsp. aerata str. ATCC 27098	0.841	0.938	0.85	0.791	0.795	0.829	0.915	0.87	0.884	0.894	0.833	0.938	0.932	0.886	0.816	0.833	0.864	0.667	0.857	0.791	0.872	0.909	0.682	0.83	0.938	0.864	0.745	0.83	0.854	0.833		947.359	900.514	940.895	1113.86	1134.73	1183.57	742.038	745.829	1090.76	681.662
Unclassified	Unclassified	Unclassified	Unclassified	sf_93	925	41280	AF254404.1	4MB-degrading consortium clone UASB_TL26	1	0.941	0.971	1	1	1	0.941	0.912	0.971	0.939	0.971	0.941	0.971	0.971	0.912	0.941	0.97	0.912	0.912	0.939	0.971	0.909	0.97	0.912	1	0.912	1	1	1	0.971		3606.21	2872.06	3594.49	3671.84	3745.74	3261.18	3036.34	2921.7	2787.19	3004.02
Actinobacteria	BD2-10 group	Unclassified	Unclassified	sf_1	1675	12813	AF001652.1	related to BDA1-5 (Marine Gram-positive ) Actinomycetes clone OCS155 OCS155	0.769	0.786	0.818	1	1	1	0.786	0.714	1	0.786	0.786	0.786	0.692	0.692	0.714	0.643	0.714	0.714	0.786	0.75	0.714	0.786	0.75	0.786	0.8	0.846	0.786	0.867	0.733	0.733		1313.8	1466.69	2501.78	3874.09	3799.67	3599.86	1801.95	1739.19	1673.21	1589.94
Firmicutes	Clostridia	Clostridiales	Clostridiaceae	sf_12	4275	16181	M59087.1	Clostridium botulinum str. type G	0.942	0.975	0.905	0.821	0.83	0.867	0.886	0.903	0.94	0.962	0.954	0.962	0.902	0.835	0.843	0.928	0.899	0.861	0.959	0.971	0.955	0.941	0.856	0.933	0.979	0.946	0.899	0.938	0.967	0.95		2450.85	2316.43	2044.52	1719.65	1721.2	1755.32	1829.02	1907.81	1714.3	1927.14
Proteobacteria	Gammaproteobacteria	Pseudomonadales	Moraxellaceae	sf_3	8838	99685	AJ748267.1	Psychrobacter psychrophilus CMS 28	0.921	1	1	0.949	0.974	0.949	0.974	0.974	1	0.974	1	1	1	0.974	0.974	1	1	1	1	1	1	1	0.974	1	1	1	1	0.974	1	0.974		3631	3244.72	2866.32	3217.5	3436.78	2909.75	2831.78	2851.45	2395.02	2963.23
Firmicutes	Bacilli	Bacillales	Bacillaceae	sf_1	3589	72679	AF519468.1	Bacillus senegalensis str. RS8; CIP 106 669	0.961	0.887	0.846	0.638	0.698	0.638	0.887	0.906	0.941	0.962	0.981	0.943	0.83	0.694	0.904	0.923	0.846	0.769	0.962	0.827	0.962	0.824	0.633	0.792	1	0.925	0.849	0.925	0.981	0.943		1506.72	1799.11	1407.25	1193	1232.48	1146.24	1035.84	1067.94	1055.02	1250.92
Firmicutes	Bacilli	Lactobacillales	Enterococcaceae	sf_1	3261	74813	AJ301836.1	Enterococcus mundtii str. LMG 10748	1	0.958	0.986	0.714	0.719	0.807	0.913	0.929	0.986	0.986	0.986	0.957	0.971	0.778	0.971	0.986	0.864	0.899	0.986	0.897	0.986	0.791	0.75	0.912	1	0.943	0.824	0.986	0.986	0.986		2297.8	2458.21	2188.15	1792.93	1891.97	1860.02	1654.54	1760.81	1506.15	1911.73
Firmicutes	Mollicutes	Acholeplasmatales	Acholeplasmataceae	sf_1	4044	NA			1	0.955	1	0.864	0.909	0.864	0.952	1	0.952	1	1	1	1	0.952	0.905	0.952	0.952	0.905	1	0.955	0.909	0.952	0.857	0.952	0.955	0.952	0.909	0.955	0.955	0.955		2956.32	2898.89	3252.68	3103.18	3067.15	2818.71	3272.99	3020.07	2754.14	3120.05
Proteobacteria	Betaproteobacteria	Burkholderiales	Alcaligenaceae	sf_1	7838	108774	AB195161.1	Alcaligenes defragrans str. PD-19	1	1	1	0.971	0.97	0.97	1	1	1	1	1	1	0.971	1	1	1	1	1	1	1	1	1	1	1	1	1	1	1	1	1		3653.64	3248.56	3290.86	2327.38	2002.07	2607.49	3432.43	3262.19	2952.46	3405.59
Proteobacteria	Gammaproteobacteria	Enterobacteriales	Enterobacteriaceae	sf_1	9302	66728	AF373198.1	Pantoea subsp. stewartii str. GSPB 2626	0.946	0.935	0.957	0.9	0.791	0.784	0.956	0.967	0.957	0.946	0.957	0.957	0.957	0.945	0.956	0.968	0.935	0.891	0.968	0.946	0.989	0.967	0.891	0.935	0.957	0.978	0.957	0.989	0.989	0.989		4409.15	3145.09	2012.7	1862.3	1861.64	1677.02	2378.53	2437.46	1946.57	2465.58
Proteobacteria	Gammaproteobacteria	Unclassified	Unclassified	sf_3	8922	NA			0.667	0.75	0.6	0.583	0.5	0.636	0.667	0.667	0.667	0.75	0.75	0.833	0.667	0.636	0.636	0.583	0.636	0.636	0.833	0.7	0.75	0.636	0.545	0.727	1	0.667	0.75	0.917	0.917	1		977.536	471.333	697.263	418.187	341.543	505.292	385.057	493.977	591.385	600.986
Proteobacteria	Alphaproteobacteria	Bradyrhizobiales	Methylobacteriaceae	sf_1	7585	4788	U58018.1	Methylobacterium thiocyanatum str. ALL/SCN-P	1	1	1	0.955	0.955	1	1	1	1	1	1	1	1	0.955	1	1	1	1	1	1	1	1	1	0.955	1	1	1	1	1	1		3624.54	2816.5	2522.69	2896.04	3125.57	3261.18	2384.55	2669.85	2649.62	2568.92
Firmicutes	Clostridia	Clostridiales	Unclassified	sf_17	2432	NA			0.968	0.906	0.812	0.857	0.741	0.821	0.933	0.933	0.933	0.967	0.903	0.903	0.875	0.742	0.767	0.867	0.933	0.833	0.909	0.812	0.844	0.967	0.875	0.875	1	0.935	0.839	0.968	0.938	1		2975.72	2873.02	2640.87	1968.8	2034.66	1855.47	2093.75	2120.75	1754.5	2411.2
Proteobacteria	Gammaproteobacteria	Enterobacteriales	Enterobacteriaceae	sf_1	8236	63934	AF476110.1	Vryburgia amaryllidis symbiont	1	1	0.909	0.909	0.909	0.909	0.909	1	1	1	1	1	1	0.909	1	0.909	0.909	1	1	0.909	1	0.909	1	0.909	1	1	0.909	0.909	0.909	0.909		3382.04	2489.82	1650.89	2216.98	2776.16	2863.32	3058.4	2380.17	2443.26	2693.11
Firmicutes	Clostridia	Clostridiales	Clostridiaceae	sf_12	4310	82036	AB100478.1	termite gut clone Rs-056	0.9	0.95	0.975	0.875	0.895	0.95	0.974	0.95	0.974	1	1	1	0.975	0.875	0.846	0.974	0.949	0.949	0.975	0.95	0.975	0.974	0.846	0.95	1	0.975	0.95	1	1	1		3559.87	2915.17	2565.42	1858.39	1839.17	1978.38	2424.66	2556.36	2162.75	2536.29
Actinobacteria	Actinobacteria	Actinomycetales	Unclassified	sf_4	1337	48548	AF234118.1	Sturt arid-zone soil clone #0425-2M17	1	1	1	1	1	0.909	1	0.909	0.818	1	0.909	1	1	0.889	0.8	0.8	0.8	0.8	0.909	0.909	0.909	0.9	0.8	0.8	1	1	0.909	1	0.909	1		3510.29	2581.79	2790.87	3130.54	3482.84	2551.95	2850.83	2254.78	2277.1	2390.35
Firmicutes	Clostridia	Clostridiales	Clostridiaceae	sf_12	4326	19113	AB040497.1	Oscillospira guilliermondii	0.865	0.895	0.838	0.833	0.833	0.919	0.842	0.865	0.865	0.921	0.921	0.974	0.892	0.811	0.838	0.865	0.865	0.842	0.946	0.895	0.895	0.892	0.763	0.868	0.974	0.919	0.895	0.919	0.974	0.947		2766.63	2678.55	2502.69	1253.58	1181.92	1368.38	2282.27	2350.98	2081.46	2264.35
Firmicutes	Bacilli	Bacillales	Staphylococcaceae	sf_1	3432	80961	AY188939.1	deep-sea sediment isolate str. P_wp0225	0.986	0.886	0.914	0.791	0.785	0.833	0.881	0.866	0.866	0.913	0.913	0.942	0.896	0.833	0.818	0.818	0.821	0.8	0.943	0.897	0.929	0.833	0.8	0.838	1	0.928	0.836	0.886	0.943	0.943		3222.53	2688.13	2565.42	2687.92	2830.09	2469.1	2512.9	2475.29	2344.99	2355
Proteobacteria	Deltaproteobacteria	Unclassified	Unclassified	sf_9	9786	NA			0.6	1	1	0.8	0.889	0.889	0.909	0.909	1	0.818	0.909	1	0.818	0.889	0.9	1	1	0.8	1	0.875	0.9	0.889	0.875	0.7	0.909	0.8	0.9	0.7	0.7	0.7		184.298	638.982	560.901	247.199	290.986	561.739	285.785	504.786	434.158	538.44
Firmicutes	Bacilli	Bacillales	Bacillaceae	sf_1	3831	36125	AY030328.1	Bacillus licheniformis str. KL-068	0.989	0.937	0.947	0.764	0.786	0.816	0.979	0.989	0.989	0.979	0.989	1	0.958	0.868	0.958	0.968	0.958	0.905	0.99	0.936	0.969	0.947	0.871	0.979	1	0.979	0.958	0.979	0.979	0.989		2901.35	2728.37	2511.78	2466.13	2505.4	2190.51	2142.88	2252.62	2046.62	2461.96
Actinobacteria	Actinobacteria	Bifidobacteriales	Bifidobacteriaceae	sf_1	2040	16594	AF275881.1	Bifidobacterium adolescentis str. E-981074T	0.875	1	0.867	0.967	0.967	0.967	0.967	0.933	0.967	0.967	0.933	0.967	0.933	0.933	0.933	0.933	0.967	0.967	0.931	0.897	0.933	0.933	0.933	1	1	1	0.933	0.967	0.967	0.933		2006.8	2282.9	1938.15	2309.8	2243.63	2283.37	2148.9	1815.93	1845.62	2021.42
Actinobacteria	Actinobacteria	Actinomycetales	Streptomycetaceae	sf_1	1617	35160	AF423260.1	soil clone 41-1	0.895	0.974	0.921	0.974	0.919	0.946	0.949	1	0.949	0.974	0.949	0.923	0.974	0.949	0.974	1	0.974	0.921	0.974	0.946	0.974	0.947	0.919	0.974	1	0.974	0.923	0.974	1	1		2154.46	1952.39	1792.7	1701.08	1394.26	1740.75	2085.73	2174.79	2280.67	1847.38
Proteobacteria	Betaproteobacteria	Ellin6095/SC-I-39	Unclassified	sf_1	8148	46075	AJ252660.1	agricultural soil clone SC-I-84	0.875	0.824	0.938	0.812	0.765	0.765	0.941	0.941	0.882	0.941	0.941	0.941	0.882	0.882	0.812	0.882	0.824	0.688	0.647	0.765	0.706	0.765	0.765	0.706	0.889	0.882	0.765	0.882	0.882	0.882		1224.35	863.152	1219.98	545.206	388.73	569.022	1248.43	1087.4	944.25	1087.76
Actinobacteria	Actinobacteria	Actinomycetales	Sporichthyaceae	sf_1	1695	83514	AY250883.1	lichen-dominated Antarctic cryptoendolithic community clone FBP417	1	1	0.955	0.955	0.909	0.909	0.955	0.955	0.955	1	0.955	0.909	0.955	0.955	0.952	0.952	0.909	0.905	0.955	1	1	0.909	0.955	0.955	0.955	1	0.955	1	0.955	0.955		2117.82	2182.31	1699.98	1689.36	1330.22	1679.75	1452.99	1649.47	1769.69	1776.67
Firmicutes	Bacilli	Lactobacillales	Enterococcaceae	sf_1	3298	43998	AJ301839.1	Enterococcus saccharolyticus str. LMG 11427	1	0.938	0.979	0.61	0.611	0.694	0.891	0.915	0.979	0.979	0.979	0.957	0.957	0.725	0.957	0.979	0.795	0.872	0.979	0.844	0.979	0.689	0.634	0.889	1	0.915	0.733	0.979	0.979	0.979		1891.48	2100.88	1853.61	1899.43	1957.13	1763.51	1625.46	1654.88	1548.14	1617.13
Firmicutes	Bacilli	Bacillales	Bacillaceae	sf_1	3675	79819	AY189750.1	Bacillus mojavensis str. M-1	0.978	0.914	0.924	0.709	0.735	0.747	0.946	0.968	0.978	0.957	0.978	0.968	0.935	0.82	0.935	0.946	0.925	0.86	0.979	0.913	0.968	0.925	0.824	0.946	1	0.957	0.925	0.957	0.978	0.978		2207.27	2197.64	1892.7	2211.11	2197.56	1809.04	1656.55	1704.6	1684.82	1849.19
Bacteroidetes	Sphingobacteria	Sphingobacteriales	Flexibacteraceae	sf_19	5542	66029	AB073595.2	Cytophaga sp. I-1787	0.833	0.909	0.909	1	1	1	0.917	0.917	0.917	0.917	0.917	0.917	1	1	1	0.909	0.909	0.909	0.917	0.917	0.833	0.909	0.909	0.909	1	0.917	0.917	0.917	0.917	0.917		3858.41	3407.58	3530.86	4736.84	4441.19	3908.5	3970.9	3690.23	3808.27	3518.9
Firmicutes	Clostridia	Clostridiales	Peptostreptococcaceae	sf_5	907	86504	AY153431.1	Peptoniphilus indolicus str. CCUG 46591	0.8	0.636	0.545	0.636	0.545	0.636	0.545	0.545	0.545	0.583	0.462	0.5	0.778	0.667	0.667	0.636	0.7	0.7	0.583	0.6	0.5	0.6	0.455	0.636	0.917	0.636	0.545	0.667	0.833	0.667		2230.98	1631.46	1619.98	1959.03	1871.75	1636.96	1660.56	1688.38	1532.95	1454.88
Firmicutes	Bacilli	Bacillales	Bacillaceae	sf_1	283	14555	Z26926.1	Geobacillus thermocatenulatus str. DSM 730	0.946	0.973	1	0.909	0.879	0.848	0.972	0.971	0.971	1	1	0.973	0.886	0.879	0.944	0.971	0.914	0.886	0.974	0.971	0.971	1	0.848	0.917	1	1	0.972	1	1	1		2468.09	2144.95	1923.61	2261.92	2318.9	2210.54	1828.02	2020.22	1776.83	2223.56
Chloroflexi	Anaerolineae	Chloroflexi-1a	Unclassified	sf_1	905	1295	AF154100.1	hydrocarbon seep clone GCA112	0.875	0.92	0.75	0.84	0.875	0.75	0.96	0.923	0.96	0.923	0.923	0.923	0.96	0.92	0.88	0.84	0.84	0.84	0.846	0.875	0.92	0.88	0.708	0.84	0.962	0.846	0.84	0.885	0.962	0.923		1147.82	900.514	1128.17	1026.9	1042.61	935.017	809.222	880.943	1156.86	894.681
Firmicutes	Clostridia	Unclassified	Unclassified	sf_7	4216	NA			0.929	0.929	0.929	1	1	0.929	0.929	1	1	1	1	1	0.929	0.929	1	0.929	1	1	0.929	0.929	1	0.929	1	1	1	1	1	1	1	1		4775.59	4298.52	4224.48	2529.64	2532.36	2885.17	3670.08	3798.32	3310.68	4043.74
Spirochaetes	Spirochaetes	Spirochaetales	Spirochaetaceae	sf_1	6535	77792	AB088868.1	termite gut homogenate clone Rs-B94 sp.	0.891	0.891	0.889	0.812	0.804	0.851	0.83	0.875	0.854	0.891	0.896	0.854	0.833	0.745	0.812	0.812	0.812	0.833	0.87	0.83	0.812	0.812	0.844	0.872	0.875	0.896	0.83	0.875	0.896	0.915		2561.86	2244.58	2385.42	1987.36	2122.29	2174.12	2143.89	2071.03	1929.59	2216.31
Proteobacteria	Gammaproteobacteria	Oceanospirillales	Oceanospirillaceae	sf_1	8322	8192	AB021367.1	Marinobacterium stanieri str. ATCC 27130T	0.9	0.667	0.7	0.917	0.833	1	0.615	0.615	0.833	0.615	0.75	0.692	0.727	0.6	0.571	0.778	0.556	0.6	0.714	0.636	0.769	0.667	0.625	0.5	0.714	0.8	0.571	0.5	0.9	0.636		573.373	421.517	459.084	463.132	520.18	862.182	279.768	364.267	385.025	358.054
Proteobacteria	Gammaproteobacteria	Enterobacteriales	Enterobacteriaceae	sf_1	8936	58294	AF543283.1	Klebsiella oxytoca str. ChDC OS31	0.972	0.972	0.991	0.879	0.75	0.835	0.991	0.981	0.981	0.981	1	0.991	0.972	0.943	0.944	1	0.953	0.935	0.991	0.991	1	0.991	0.935	0.981	1	1	1	1	1	1		4265.81	3194.91	1964.52	1310.25	1232.48	1514.96	2314.36	2512.04	1841.15	2451.99
Firmicutes	Clostridia	Clostridiales	Clostridiaceae	sf_12	4157	77693	AB089043.1	termite gut homogenate clone Rs-A15 bacterium	1	1	1	0.933	0.933	0.933	0.9	0.9	0.9	0.933	0.933	0.931	0.9	0.867	0.862	0.833	0.9	0.9	1	1	0.933	0.9	0.828	0.9	1	0.933	0.9	0.933	0.967	0.967		3857.33	3272.51	3060.86	2191.57	2229.02	2307.04	3045.36	3013.58	2539.74	2839.05
Firmicutes	Clostridia	Clostridiales	Lachnospiraceae	sf_5	2921	78382	AB088957.1	termite gut homogenate clone Rs-K95 bacterium	0.917	0.769	0.692	0.643	0.643	0.571	0.643	0.75	0.6	0.692	0.769	0.692	0.643	0.643	0.562	0.692	0.6	0.714	0.643	0.75	0.692	0.6	0.643	0.692	0.769	0.75	0.692	0.692	0.75	0.75		2448.69	1959.1	1882.7	1451.93	1250.45	1624.22	1673.6	2247.22	1652.66	1955.24
Firmicutes	Bacilli	Lactobacillales	Lactobacillaceae	sf_1	3842	15233	Y19168.1	Lactobacillus perolens str. L534	0.833	0.833	0.75	0.667	0.667	0.714	0.727	0.75	0.833	0.833	0.833	0.833	0.75	0.556	0.833	0.75	0.455	0.667	0.833	0.727	0.833	0.636	0.6	0.727	0.833	0.75	0.545	0.833	0.909	0.833		1875.32	1870.96	1291.8	1800.74	1799.84	2416.3	1195.28	1192.25	1070.21	1172.97
Firmicutes	Clostridia	Clostridiales	Peptostreptococcaceae	sf_5	2721	77890	AB088971.1	termite gut homogenate clone Rs-N71 bacterium	0.926	0.963	0.926	0.926	0.926	0.926	0.926	0.926	0.926	0.926	0.926	0.926	0.926	0.889	0.926	0.926	0.926	0.962	0.963	0.963	0.926	0.926	0.926	0.962	1	0.926	0.926	0.963	1	0.926		3070.56	3205.45	2985.41	3008.4	2982.89	2722.2	3287.03	2721.74	2452.19	2813.67
Unclassified	Unclassified	Unclassified	Unclassified	sf_160	8891	NA			0.783	0.826	0.773	0.87	0.87	0.905	0.875	0.8	0.87	0.833	0.84	0.741	0.87	0.792	0.76	0.75	0.87	0.75	0.808	0.875	0.808	0.87	0.792	0.792	0.885	0.913	0.84	0.815	0.815	0.88		1752.45	1544.29	1416.34	2047.94	1965	2071.24	1706.69	1460.31	1797.38	1492.04
Firmicutes	Bacilli	Bacillales	Bacillaceae	sf_1	3617	48416	AJ229200.1	anoxic bulk soil flooded rice microcosm clone BSV45 clone	0.771	0.795	0.718	0.533	0.571	0.561	0.817	0.795	0.832	0.871	0.855	0.862	0.826	0.519	0.793	0.827	0.793	0.658	0.908	0.712	0.804	0.745	0.509	0.716	0.882	0.816	0.767	0.845	0.861	0.819		1236.2	1381.43	1133.62	857.869	910.033	986.001	799.195	827.978	881.717	1071.44
Firmicutes	Bacilli	Lactobacillales	Lactobacillaceae	sf_1	3604	NA			0.792	0.893	0.741	0.745	0.673	0.714	0.788	0.731	0.776	0.945	0.778	0.774	0.868	0.66	0.596	0.686	0.612	0.62	0.745	0.739	0.811	0.673	0.646	0.623	0.927	0.72	0.635	0.727	0.818	0.764		1821.43	1933.23	1621.79	1838.85	1735.8	1576.87	1779.89	1739.19	1642.83	1648.86
Firmicutes	Clostridia	Clostridiales	Peptostreptococcaceae	sf_5	2714	77885	AB088954.2	termite gut homogenate clone Rs-N27 bacterium	0.952	0.968	0.952	0.889	0.85	0.918	0.952	0.952	0.952	0.952	0.952	0.952	0.921	0.933	0.921	0.921	0.937	0.952	0.968	0.968	0.968	0.968	0.95	0.984	0.968	0.952	0.952	0.952	0.952	0.937		3552.32	3495.72	3300.86	2775.86	2673.93	2340.73	2679.36	2634.18	2147.57	2869.87
Chloroflexi	Dehalococcoidetes	Unclassified	Unclassified	sf_1	2485	NA			1	0.929	1	0.929	0.929	0.929	1	0.933	1	1	1	0.933	1	1	1	1	1	1	1	1	1	1	1	1	1	0.933	1	1	1	1		2704.12	2105.67	2045.42	1796.83	1995.33	2343.46	1773.87	1758.64	1959.97	1831.06
Actinobacteria	Actinobacteria	Actinomycetales	Gordoniaceae	sf_1	1567	NA			0.933	0.882	0.875	0.812	0.812	0.812	0.812	0.875	0.812	0.875	0.875	0.938	0.875	0.875	0.875	0.812	0.875	0.875	0.882	0.875	1	0.875	0.875	0.875	0.941	0.938	0.812	0.875	1	0.938		2709.51	1676.49	2255.42	2253.13	2441.36	2774.1	2314.36	2126.15	2556.71	2633.28
Actinobacteria	Actinobacteria	Actinomycetales	Intrasporangiaceae	sf_1	1935	NA			0.875	1	0.8	1	1	1	0.889	0.8	1	0.8	0.636	0.778	1	1	1	0.8	0.889	0.889	0.778	0.889	1	0.889	1	0.875	0.909	1	0.7	0.727	0.818	0.75		1526.12	1367.06	1379.98	2614.64	2218.91	2323.43	1353.72	1433.29	2354.82	1236.42
Proteobacteria	Betaproteobacteria	Neisseriales	Neisseriaceae	sf_1	7703	NA			0.837	0.958	0.957	0.956	0.886	0.909	0.979	1	0.957	1	1	0.979	0.957	1	0.936	1	0.979	0.979	1	0.979	0.979	0.957	0.933	0.957	1	1	0.979	0.959	1	1		2826.99	2407.44	2653.6	1663.95	1425.72	1897.35	2402.6	2421.24	2109.15	2568.92
Proteobacteria	Gammaproteobacteria	Unclassified	Unclassified	sf_3	9279	NA			0.857	0.857	0.846	0.923	1	0.923	1	1	0.923	1	1	0.857	1	1	0.75	0.923	1	0.846	0.8	0.923	0.923	0.917	1	1	0.929	1	0.923	1	0.923	1		806.171	916.8	1024.53	872.525	987.555	1040.63	473.3	682.055	782.557	707.043
Firmicutes	Desulfotomaculum	Unclassified	Unclassified	sf_1	522	60013	AB091327.1	UASB granular sludge clone UT-1	0.917	0.875	0.957	0.913	0.955	0.955	0.833	0.957	0.957	0.875	0.913	0.84	0.909	0.909	0.792	0.913	0.957	0.76	0.84	0.875	0.875	0.957	0.957	0.913	0.84	0.917	0.8	0.957	0.957	0.957		2980.03	2492.7	2764.51	2673.27	3032.32	2624.79	2402.6	2296.94	2339.63	2297.89
Firmicutes	Bacilli	Bacillales	Paenibacillaceae	sf_1	3735	14423	X77846.1	Paenibacillus durus str. DSM 1735	0.75	0.765	0.722	0.632	0.632	0.737	0.588	0.684	0.7	0.737	0.632	0.778	0.722	0.647	0.579	0.579	0.556	0.722	0.611	0.5	0.722	0.722	0.588	0.556	0.85	0.842	0.647	0.789	0.947	0.789		347.041	341.046	706.353	303.869	394.348	584.499	407.118	349.134	499.372	474.988
Proteobacteria	Gammaproteobacteria	Unclassified	Unclassified	sf_3	8911	NA			0.571	0.882	0.625	0.8	0.842	0.842	0.647	0.733	0.75	0.875	0.875	0.722	0.688	0.643	0.467	0.75	0.5	0.333	0.947	0.647	0.737	0.625	0.267	0.562	0.889	0.938	0.625	0.875	0.824	0.824		293.153	386.071	271.814	277.488	265.146	416.069	156.43	205.373	242.986	264.688
Actinobacteria	Actinobacteria	Acidimicrobiales	Unclassified	sf_1	1256	79537	AF382135.1	bacterioplankton clone ZA3612c	0.833	0.842	0.833	0.789	0.778	0.789	0.833	0.889	0.882	0.889	0.895	0.889	0.941	0.882	0.941	0.833	0.833	0.889	0.889	0.889	0.842	0.889	0.778	0.941	0.947	0.842	0.789	0.947	0.947	0.947		3249.47	2547.3	2482.69	2346.93	2223.4	2181.4	2568.05	2608.24	2452.19	2684.04
Proteobacteria	Epsilonproteobacteria	Campylobacterales	Campylobacteraceae	sf_3	10387	NA			0.364	0.913	0.875	0.667	0.565	0.708	0.708	0.739	0.625	0.708	0.708	0.75	0.739	0.565	0.545	0.81	0.696	0.652	0.75	0.833	0.708	0.708	0.739	0.708	0.708	0.708	0.708	0.667	0.667	0.667		195.076	1326.82	1726.34	336.113	187.624	490.725	974.677	850.677	592.278	979.889
Actinobacteria	Actinobacteria	Actinomycetales	Nocardiaceae	sf_1	1834	82063	AF430047.1	Nocardia transvalensis str. DSM 43405	0.632	0.955	0.85	0.957	0.826	0.913	0.87	0.87	0.909	0.957	0.957	0.957	0.913	0.864	0.739	0.7	0.85	0.65	0.909	0.714	0.818	0.714	0.632	0.65	0.957	0.955	0.739	0.957	0.957	0.957		1318.11	1564.4	1853.61	1223.29	1071.82	1330.15	963.646	973.901	1355.18	1227.35
Proteobacteria	Gammaproteobacteria	Xanthomonadales	Xanthomonadaceae	sf_3	8453	7877	AJ012231.1	Pseudoxanthomonas broegbernensis str. B1616/1	0.2	0.909	0.7	0.5	0.625	0.625	0.818	0.818	0.636	0.818	0.818	0.818	0.75	0.5	0.6	0.8	0.636	0.636	0.909	0.727	0.727	0.8	0.556	0.6	0.818	0.636	0.636	0.7	0.818	0.727		49.5774	503.905	342.722	108.455	137.067	194.833	136.374	201.05	172.413	190.358
Firmicutes	Mollicutes	Acholeplasmatales	Acholeplasmataceae	sf_1	4046	15583	L33735.1	Pigeon pea witches'-broom mycoplasma-like organism	0.941	1	0.882	0.941	0.941	0.824	1	1	0.941	1	1	1	1	0.941	0.941	1	1	0.941	1	1	1	1	0.941	1	1	1	1	1	1	1		3371.26	2964.99	3681.76	3707.99	3709.79	3207.46	3405.35	3158.42	2907.79	3350.29
Firmicutes	Clostridia	Clostridiales	Peptostreptococcaceae	sf_5	2797	76083	AY167963.1	Isolation and identification hyper-ammonia producing swine storage pits manure	1	1	1	0.942	0.9	0.96	1	1	1	1	1	1	0.962	0.94	0.962	0.981	0.981	1	1	1	1	1	1	1	1	1	1	0.981	0.981	0.981		2773.1	3190.12	2749.96	1668.84	1778.5	1911	2050.63	2014.82	1608.89	2402.13
Firmicutes	Clostridia	Clostridiales	Peptococc/Acidaminococc	sf_11	710	39572	AF458222.1	Centipeda periodontii str. HB-2	0.979	0.979	1	0.889	0.909	0.911	1	0.979	0.957	1	1	1	0.935	0.911	0.826	0.957	1	0.979	0.957	0.957	1	0.979	0.978	1	1	1	0.979	1	1	1		3626.69	3237.06	2859.05	2392.85	2387.43	2172.3	2865.87	2770.38	2305.69	2785.57
Actinobacteria	Actinobacteria	Bifidobacteriales	Bifidobacteriaceae	sf_1	1967	12610	D86187.1	Bifidobacterium pseudocatenulatum str. JCM1200	0.886	1	0.879	0.97	0.97	0.97	0.97	0.939	0.97	0.97	0.939	0.97	0.939	0.939	0.939	0.939	0.97	0.97	0.938	0.906	0.939	0.939	0.939	1	1	1	0.939	0.97	0.97	0.939		2309.66	2369.12	2010.88	2410.44	2508.77	2402.64	2504.88	1926.18	2020.71	2220.84
Gemmatimonadetes	Unclassified	Unclassified	Unclassified	sf_5	2047	44411	AF234148.1	soil clone #0319-7G21	0.947	0.947	0.882	1	1	1	0.895	0.947	0.895	1	1	1	0.889	0.889	0.895	0.889	0.889	0.944	0.947	1	1	0.889	0.882	0.895	1	0.895	1	0.947	0.947	0.947		2503.66	1644.87	2012.7	2173.01	2326.76	2302.49	1776.88	1642.99	1780.41	1745.85
Proteobacteria	Gammaproteobacteria	Pasteurellales	Pasteurellaceae	sf_1	9360	42806	AF224297.1	Pasteurella multocida subsp. gallicida str. MCCM 00021 subsp.	0.966	0.964	0.963	0.8	0.808	0.84	0.778	0.808	0.885	0.769	0.769	0.808	0.808	0.769	0.769	0.808	0.792	0.667	0.786	0.808	0.815	0.792	0.84	0.704	0.821	0.846	0.815	0.808	0.808	0.846		3998.52	2771.48	3024.5	3310.32	3170.51	2979.85	2909.99	3156.26	2746.1	3044.82
Actinobacteria	Actinobacteria	Actinomycetales	Cellulomonadaceae	sf_1	1748	26352	Y18378.1	Beutenbergia cavernosa str. DSM 12333	1	1	1	0.929	0.929	1	0.933	1	0.933	1	1	0.933	1	0.933	0.933	1	1	1	1	1	1	0.933	0.857	0.933	1	1	1	1	1	1		2299.96	2640.23	2394.51	3117.84	3206.46	2833.27	1926.29	2050.49	2284.25	1651.58
OP9/JS1	OP9	Unclassified	Unclassified	sf_1	726	1659	AF027086.1	hot spring clone OPB72	1	1	1	1	1	1	1	1	1	1	1	1	1	1	1	1	1	1	1	1	1	1	1	1	1	1	1	1	1	1		3684.89	2856.74	2976.32	3257.56	3366	3231.14	3003.25	2662.29	2854.19	2786.47
Actinobacteria	Actinobacteria	Actinomycetales	Dietziaceae	sf_1	1970	68351	AF481211.1	Dietzia sp. str. E9_2	1	0.944	0.938	1	0.941	1	1	1	1	1	0.944	0.944	1	1	0.941	0.941	1	0.944	1	1	1	1	0.882	1	0.947	1	1	0.941	0.944	1		2010.04	1447.53	1150.89	1138.29	1126.87	1633.32	1339.68	1541.38	1959.97	1492.95
Firmicutes	Clostridia	Clostridiales	Clostridiaceae	sf_12	3019	83820	AY245527.1	Tepidibacter formicigenes str. DV1184	0.929	1	1	0.769	0.615	0.846	0.867	0.867	0.786	0.867	0.867	0.867	0.867	0.786	0.8	0.786	0.846	0.8	0.867	1	0.933	0.8	0.769	0.8	0.933	0.733	0.8	0.8	0.8	0.8		1890.41	1785.7	1350.89	1603.37	1731.31	1704.33	1752.81	1344.65	1424.86	1589.03
Firmicutes	Clostridia	Clostridiales	Clostridiaceae	sf_12	4378	NA			0.923	0.925	0.927	0.816	0.821	0.8	0.875	0.923	0.878	0.927	0.927	0.95	0.95	0.811	0.75	0.9	0.9	0.821	0.951	0.927	0.951	0.902	0.878	0.951	0.902	0.927	0.902	0.951	0.927	0.951		2750.47	2766.69	2259.97	2026.45	1776.25	1759.87	2129.85	2225.6	1869.74	2117.5
Proteobacteria	Gammaproteobacteria	Enterobacteriales	Enterobacteriaceae	sf_1	8886	9773	AF170176.1	Salmonella typhimurium LT2 str. SGSC1412	0.971	0.977	0.965	0.892	0.837	0.855	0.976	0.971	0.977	0.976	0.977	0.976	0.982	0.964	0.971	0.988	0.97	0.964	0.988	0.982	1	0.976	0.959	0.982	0.965	0.982	0.982	0.994	0.988	0.994		4458.73	3360.64	2250.88	2010.81	2091.95	2011.15	2554.01	2652.56	2110.05	2605.18
Proteobacteria	Gammaproteobacteria	Aeromonadales	Succinivibrionaceae	sf_1	8822	60771	AF497809.1	Anaerobiospirillum sp. str. 3J102	0.938	1	0.969	0.938	0.906	0.968	0.969	1	0.969	1	1	1	0.969	0.935	0.906	0.969	0.935	0.935	0.969	0.969	0.969	0.938	0.935	0.906	1	1	0.969	0.969	1	1		3877.81	3056.96	3544.49	1570.15	1471.78	2068.51	2727.49	3194.09	3030.18	3348.48
Cyanobacteria	Cyanobacteria	Chloroplasts	Chloroplasts	sf_5	5182	3501	M81884.1	Epifagus virginiana -- chloroplast	1	1	1	1	1	1	1	1	1	1	1	1	1	1	1	1	1	1	1	1	1	1	1	1	1	1	1	1	1	1		2070.39	2271.4	1975.43	3032.83	2908.74	3303.97	2910.99	2380.17	2684.46	3387.46
Firmicutes	Bacilli	Bacillales	Bacillaceae	sf_1	3656	NA			0.783	0.75	0.75	0.652	0.625	0.667	0.708	0.708	0.667	0.68	0.75	0.708	0.68	0.727	0.6	0.92	0.625	0.6	0.84	0.75	0.792	0.625	0.625	0.667	0.708	0.75	0.652	0.75	0.792	0.792		1076.69	1336.4	903.623	861.777	906.663	900.421	1071.94	1047.4	993.383	817.631
Firmicutes	Bacilli	Lactobacillales	Lactobacillaceae	sf_1	3914	18965	AJ251560.1	Lactobacillus cypricasei str. LMK3	0.9	0.871	0.867	0.815	0.655	0.714	0.828	0.793	0.793	0.839	0.9	0.793	0.793	0.786	0.75	0.931	0.793	0.815	0.933	0.897	0.9	0.821	0.724	0.821	0.966	0.9	0.821	0.867	0.933	0.9		1969.08	2059.69	2010.88	1966.85	1714.46	1636.05	2135.87	2125.07	1869.74	1861.88
Cyanobacteria	Cyanobacteria	Scytonema	Unclassified	sf_1	5115	84987	AB093483.1	Scytonema sp. str. IAM M-262	0.759	0.781	0.844	0.871	0.871	0.903	0.812	0.812	0.906	0.906	0.935	0.818	0.875	0.812	0.75	0.839	0.812	0.833	0.812	0.812	0.812	0.812	0.806	0.781	0.871	0.875	0.75	0.812	0.875	0.906		1506.72	1644.87	1682.7	1818.33	1842.54	2018.44	1911.25	1719.73	1769.69	2049.52
Proteobacteria	Alphaproteobacteria	Rickettsiales	Anaplasmataceae	sf_3	6890	74038	U03775.1	Anaplasma bovis	0.737	0.895	0.833	0.8	0.7	0.714	0.895	0.85	0.8	0.895	0.895	0.81	0.85	0.842	0.65	0.895	0.842	0.842	0.7	0.895	0.895	0.889	0.842	0.842	0.895	0.895	0.889	0.842	0.947	0.947		2180.33	1787.62	2034.52	1440.2	1358.31	1719.81	1552.26	1575.97	1617.82	1863.69
Firmicutes	Bacilli	Bacillales	Halobacillaceae	sf_1	3756	63140	AY121439.1	Salibacillus sp. str. YIM-kkny16	0.974	0.905	0.95	0.892	0.889	0.868	0.929	0.976	0.929	0.976	1	0.976	0.857	0.868	0.905	0.976	0.905	0.881	0.977	0.976	0.976	0.929	0.846	0.905	1	0.976	0.952	0.976	1	0.976		1808.5	2197.64	1885.43	1505.67	1379.66	1534.99	1181.24	1333.85	1277.46	1713.22
Firmicutes	Bacilli	Bacillales	Halobacillaceae	sf_1	3849	14614	X94558.1	Halobacillus litoralis str. SL-4	1	0.909	1	0.9	0.9	0.9	0.7	1	1	1	1	1	1	0.9	0.6	1	1	0.9	0.727	0.9	0.9	0.7	0.8	0.8	1	1	0.8	0.9	1	1		251.12	237.582	577.264	150.469	168.525	355.98	125.344	168.622	284.079	251.997
Firmicutes	Bacilli	Lactobacillales	Lactobacillaceae	sf_1	3618	35518	AF243159.1	Lactobacillus jensenii str. KC36b	0.714	0.846	0.846	0.692	0.75	0.833	0.714	0.786	0.833	0.786	0.857	0.929	0.714	0.75	0.769	0.929	0.75	0.769	0.786	0.833	0.786	0.769	0.727	0.769	0.857	0.714	0.769	0.786	0.857	0.846		2213.74	2964.99	2119.06	1917.01	1798.72	1912.82	2553.01	2424.48	2510.26	2132.91
Firmicutes	Bacilli	Bacillales	Paenibacillaceae	sf_1	625	14467	Y14580.1	Ammoniphilus oxalivorans str. RAOx-FS	0.81	0.931	0.875	0.732	0.623	0.691	0.879	0.898	0.893	0.932	0.932	0.965	0.793	0.755	0.839	0.875	0.852	0.857	0.864	0.891	0.847	0.893	0.815	0.807	0.915	0.966	0.842	0.932	0.932	0.915		1806.34	1882.46	1723.61	1501.76	1448.19	1556.84	1294.55	1357.63	1401.64	1595.38
Proteobacteria	Gammaproteobacteria	Enterobacteriales	Enterobacteriaceae	sf_1	9274	86519	AJ550468.1	Enterobacter sp. CC1	0.978	0.978	0.993	0.872	0.779	0.8	0.978	0.964	0.985	0.964	0.971	0.978	0.985	0.963	0.956	0.985	0.948	0.948	0.993	0.993	0.985	0.985	0.963	0.971	0.985	0.956	0.993	1	0.993	0.985		4146.18	3114.44	2026.33	1709.88	1779.62	1697.05	2271.24	2353.14	1964.43	2410.29
Actinobacteria	Actinobacteria	Actinomycetales	Streptomycetaceae	sf_1	1375	72661	AF423240.1	soil clone 228-1	0.865	0.947	0.892	0.946	0.889	0.917	0.921	0.974	0.921	0.947	0.921	0.895	0.947	0.921	0.947	0.973	0.946	0.892	0.946	0.917	0.946	0.919	0.889	0.946	0.974	0.947	0.895	0.947	0.974	0.974		2019.74	1772.29	1610.89	1593.6	1286.41	1632.41	1943.34	2052.65	2181.51	1708.69
Proteobacteria	Deltaproteobacteria	Desulfovibrionales	Desulfovibrionaceae	sf_1	9709	78153	AB089104.1	termite gut homogenate clone Rs-N31 proteobacterium	0.96	0.96	0.98	0.98	0.98	0.98	0.96	0.96	1	0.98	1	0.94	0.98	0.96	0.94	0.92	0.96	0.92	0.96	0.98	1	0.94	0.96	0.96	0.98	0.96	0.96	1	0.98	0.98		3421.91	2917.09	2765.41	2688.9	2707.63	2911.57	2815.73	2960.62	2624.6	2983.18
Proteobacteria	Gammaproteobacteria	Enterobacteriales	Enterobacteriaceae	sf_1	9651	66749	AF373176.1	Pectobacterium subsp. atrosepticum str. GSPB 1710	0.975	0.981	0.914	0.899	0.828	0.846	0.994	0.982	0.969	0.982	0.988	0.994	0.969	0.956	0.944	0.988	0.975	0.933	0.988	0.975	1	0.982	0.951	0.988	0.982	0.988	0.982	1	0.994	1		3926.31	2923.8	1798.16	1004.43	852.735	1077.96	1950.36	2184.52	1768.79	2215.4
Termite group 1	Unclassified	Unclassified	Unclassified	sf_2	993	77861	AB089049.1	termite gut homogenate clone Rs-D95 group	0.75	0.882	0.8	0.812	0.812	0.867	0.889	0.882	0.833	0.895	0.789	0.895	0.889	0.833	0.765	0.875	0.882	0.778	0.789	0.938	0.833	0.882	0.875	0.833	0.947	0.889	0.833	0.842	0.895	0.789		1822.51	1923.65	2363.6	1285.83	1123.5	1518.61	1715.71	1849.44	1634.79	1749.48
Firmicutes	Clostridia	Clostridiales	Clostridiaceae	sf_12	4560	16250	X68180.1	Clostridium beijerinckii str. NCIMB9362	0.963	0.988	0.976	0.853	0.837	0.861	0.988	1	0.982	0.994	1	1	0.907	0.838	0.856	0.97	0.97	0.957	1	1	1	1	0.964	1	1	1	0.988	0.994	0.994	0.994		2465.93	2693.88	2333.6	1457.79	1308.88	1494.02	1721.73	1796.48	1443.62	2044.98
Bacteroidetes	Bacteroidetes	Bacteroidales	Unclassified	sf_15	5500	78229	AJ535228.1	marine sediment above hydrate ridge clone Hyd24-66	0.778	0.789	0.789	0.8	0.842	0.789	0.947	0.895	1	0.895	0.895	0.895	0.947	0.895	0.889	0.833	0.889	0.944	0.947	0.895	0.895	0.944	0.842	0.944	0.947	0.895	0.895	0.895	0.947	0.895		3258.09	2573.17	2579.05	3201.86	3207.59	2646.64	2886.93	2782.27	2988.19	2687.67
Firmicutes	Bacilli	Bacillales	Paenibacillaceae	sf_1	319	14469	Y14579.1	Ammoniphilus oxalaticus str. RAOx-FF	0.814	0.932	0.877	0.737	0.63	0.696	0.881	0.9	0.895	0.933	0.933	0.966	0.797	0.759	0.842	0.877	0.855	0.86	0.867	0.893	0.85	0.895	0.818	0.81	0.917	0.966	0.845	0.933	0.933	0.917		1840.83	1938.98	1763.61	1575.04	1541.44	1602.37	1361.74	1419.24	1454.34	1637.08
Actinobacteria	Actinobacteria	Actinomycetales	Streptosporangiaceae	sf_1	1224	12135	X89941.1	Acrocarpospora corrugata str. DSM43316T	0.8	1	0.818	0.818	0.818	0.909	1	0.909	1	1	1	1	1	1	1	0.818	0.909	0.818	0.727	0.727	0.909	0.909	0.727	0.909	1	1	0.909	1	1	1		1822.51	1398.67	1236.35	1361.06	1322.36	1393.88	1676.6	1221.43	1271.21	1417.71
Firmicutes	Bacilli	Bacillales	Bacillaceae	sf_1	3909	14731	D26185.1	Bacillus subtilis subsp. Marburg str. 168	0.967	0.889	0.903	0.667	0.691	0.724	0.937	0.968	0.968	0.937	0.968	0.968	0.905	0.78	0.905	0.937	0.905	0.81	0.969	0.887	0.953	0.905	0.754	0.937	1	0.952	0.905	0.952	0.968	0.968		1715.81	2019.45	1803.61	1988.34	1930.17	1670.65	1416.89	1513.28	1472.21	1639.79
Actinobacteria	Actinobacteria	Actinomycetales	Pseudonocardiaceae	sf_1	1863	NA			0.929	1	1	0.929	0.923	0.923	0.929	1	0.929	0.929	0.929	1	0.929	0.929	0.929	0.923	1	0.786	1	0.923	1	1	0.917	1	1	0.929	0.857	0.857	1	1		1847.3	1473.39	1335.44	1500.78	1381.9	1961.99	996.737	1240.89	1525.81	1069.63
Firmicutes	Clostridia	Clostridiales	Clostridiaceae	sf_12	4327	49276	AB040498.1	Oscillospira guilliermondii	0.857	0.892	0.829	0.794	0.794	0.886	0.806	0.829	0.829	0.889	0.889	0.944	0.857	0.771	0.8	0.829	0.829	0.806	0.914	0.861	0.861	0.857	0.722	0.833	0.944	0.886	0.861	0.886	0.944	0.917		2571.56	2438.09	2339.97	1081.62	1005.53	1198.13	2140.88	2229.92	1962.65	2121.13
Firmicutes	Clostridia	Clostridiales	Syntrophomonadaceae	sf_5	2493	50462	AB061441.1	Thermaerobacter nagasakiensis str. JCM 11223	0.809	0.857	0.857	0.833	0.783	0.87	0.771	0.78	0.848	0.875	0.86	0.917	0.771	0.8	0.667	0.816	0.844	0.723	0.863	0.872	0.863	0.884	0.767	0.766	0.9	0.851	0.826	0.857	0.857	0.854		1786.94	1684.15	1963.61	1652.23	1741.42	1681.57	1586.36	1600.83	1566.9	1714.13
Firmicutes	Clostridia	Clostridiales	Syntrophomonadaceae	sf_5	2436	13721	AB011495.1	Thermaerobacter marianensis	0.833	0.875	0.857	0.852	0.808	0.865	0.8	0.807	0.865	0.891	0.877	0.927	0.782	0.804	0.704	0.836	0.846	0.759	0.879	0.87	0.862	0.88	0.776	0.796	0.912	0.852	0.83	0.857	0.875	0.855		1892.56	1833.6	1964.52	1725.51	1797.6	1697.96	1644.52	1670.01	1551.71	1814.74
Firmicutes	Clostridia	Clostridiales	Clostridiaceae	sf_12	2786	40074	AY007244.1	Clostridium glycolicum str. CIN5	0.953	0.977	0.953	0.881	0.85	0.938	0.929	0.929	0.964	0.942	0.965	0.919	0.893	0.875	0.871	0.915	0.905	0.893	0.943	1	0.977	0.929	0.916	0.894	0.954	0.942	0.872	0.952	0.93	0.93		2485.33	2805.96	2523.6	1920.92	1959.38	2065.78	2024.56	2009.41	1795.59	2228.09
Actinobacteria	Actinobacteria	Actinomycetales	Nocardiaceae	sf_1	1940	108400	AB178563.1	Rhodococcus opacus str. B-4	0.429	0.9	0.667	1	0.818	0.909	0.818	0.818	0.9	1	1	1	0.909	0.727	0.545	0.5	0.875	0.375	0.9	0.667	0.8	0.444	0.375	0.375	1	1	0.636	1	1	1		515.173	627.486	835.442	904.768	692.075	771.139	373.024	442.093	787.024	527.563
Firmicutes	Mollicutes	Anaeroplasmatales	Erysipelotrichaceae	sf_3	3952	77904	AB055907.1	Erysipelothrix rhusiopathiae str. Pecs 56	0.944	0.95	1	0.85	0.895	0.895	0.9	0.9	0.947	0.95	0.95	0.95	0.9	0.895	0.9	0.9	0.9	0.9	0.95	0.95	0.95	0.95	0.85	0.9	0.95	0.95	0.9	1	1	1		3604.06	2897.93	3285.41	2794.42	3061.53	2737.68	2913	3050.33	2895.28	3124.58
Proteobacteria	Betaproteobacteria	Burkholderiales	Oxalobacteraceae	sf_1	7743	74451	AF361023.1	Herbaspirillum sp. str. NAH4	0.773	0.905	0.905	0.905	0.905	0.905	0.905	0.909	0.864	0.864	0.864	0.864	0.818	0.905	0.864	0.905	0.905	0.905	0.909	0.909	0.909	0.905	0.864	0.905	0.909	0.905	0.905	0.909	0.909	0.909		2570.48	2445.76	2485.42	2275.6	1949.27	2449.07	2906.98	2587.7	2606.74	2780.13
Firmicutes	Clostridia	Clostridiales	Clostridiaceae	sf_12	4177	31319	AF241842.1	Clostridium subterminale DSM 2636	0.926	0.968	0.89	0.816	0.826	0.857	0.875	0.889	0.929	0.942	0.934	0.946	0.896	0.826	0.825	0.912	0.887	0.85	0.955	0.972	0.948	0.921	0.841	0.918	0.98	0.93	0.884	0.922	0.959	0.934		2490.72	2334.63	2106.33	1895.52	1920.06	1890.97	1994.48	2005.09	1756.29	2040.45
Spirochaetes	Spirochaetes	Spirochaetales	Spirochaetaceae	sf_1	6463	78179	AB088901.1	termite gut homogenate clone Rs-C91 sp.	0.7	0.667	0.636	0.667	0.667	0.667	0.667	0.667	0.75	0.917	0.917	0.917	0.75	0.727	0.583	0.583	0.667	0.636	0.667	0.667	0.667	0.667	0.727	0.667	0.917	0.75	0.667	0.75	0.917	0.75		2823.75	1541.41	1879.97	2112.43	2425.63	1917.38	2357.47	2107.78	2081.46	2085.78
Firmicutes	Mollicutes	Anaeroplasmatales	Erysipelotrichaceae	sf_3	3956	15716	X73441.1	Clostridium spiroforme str. DSM 1552	0.912	0.949	0.914	0.857	0.825	0.909	0.807	0.825	0.842	0.86	0.875	0.818	0.825	0.81	0.754	0.825	0.839	0.768	0.764	0.839	0.821	0.855	0.836	0.821	0.8	0.891	0.804	0.86	0.875	0.891		2923.99	2384.45	3029.05	2927.31	3010.97	2734.04	2594.12	2365.03	2400.38	2654.13
Firmicutes	Bacilli	Bacillales	Bacillaceae	sf_1	234	23576	AJ293805.1	Bacillus vulcani str. 3S-1	0.95	1	1	0.923	0.897	0.897	0.976	0.975	0.975	1	1	1	0.9	0.921	0.95	0.975	0.9	0.9	0.976	0.975	0.975	0.975	0.872	0.902	1	1	0.976	1	1	1		2765.55	2516.65	1986.33	2103.64	2176.22	2221.46	1880.16	2064.54	1796.49	2259.82
Unclassified	Unclassified	Unclassified	Unclassified	sf_92	9999	78071	AB089068.1	termite gut homogenate clone Rs-J96	1	0.9	0.909	1	0.9	0.9	0.8	0.818	0.818	0.909	0.909	0.909	0.818	0.8	0.9	1	0.909	0.818	0.9	0.9	0.9	0.818	0.818	0.909	0.909	0.909	1	1	1	0.909		2843.15	2728.37	2647.23	3100.25	2624.49	2454.53	3079.46	2302.34	2189.55	2616.96
Cyanobacteria	Unclassified	Unclassified	Unclassified	sf_9	5038	58155	AF544207.1	Rumen isolate str. YS2	0.917	0.917	0.833	1	1	0.917	0.917	0.917	0.917	1	1	1	0.917	0.917	0.917	0.917	0.917	0.917	1	1	0.917	0.917	1	1	1	1	1	1	1	1		2282.71	2391.15	2463.6	1961.96	2033.53	1683.39	2138.87	1979.15	1833.11	2243.5
Chloroflexi	Dehalococcoidetes	Unclassified	Unclassified	sf_1	2367	63109	AY093473.1	deep marine sediment clone MB-B2-113	1	0.97	1	1	1	1	1	0.971	0.97	1	1	0.971	0.97	0.97	0.97	1	1	1	0.97	0.97	1	0.97	1	1	1	0.971	1	1	1	1		3075.95	2744.65	3048.14	2896.04	3121.08	3089.11	2563.04	2422.32	2495.96	2689.48
Firmicutes	Bacilli	Lactobacillales	Lactobacillaceae	sf_1	3634	56512	AJ417738.1	Lactobacillus letivazi str. JCL3994	0.96	1	1	0.826	0.826	0.87	0.875	0.875	1	0.96	1	0.84	0.958	0.87	0.913	1	0.909	0.909	1	0.913	1	0.826	0.826	0.875	1	0.917	0.913	0.96	1	0.96		3035	2950.62	2954.5	3734.37	3622.16	3166.49	3182.74	3030.88	3107.9	2722.11
Firmicutes	gut clone group	Unclassified	Unclassified	sf_1	4298	83830	AY207065.1	human mouth clone P4PA_66	0.939	0.941	0.912	0.853	0.879	0.879	0.912	0.912	0.912	0.912	0.912	0.912	0.882	0.909	0.912	0.909	0.882	0.909	0.941	0.97	0.912	0.882	0.882	0.938	0.941	0.939	0.912	0.912	0.912	0.882		3292.58	3053.13	2907.23	2597.06	2534.61	2333.45	2617.19	2433.13	1943.89	2712.14
Firmicutes	Bacilli	Bacillales	Bacillaceae	sf_1	3861	43113	AJ229201.1	anoxic bulk soil flooded rice microcosm clone BSV46 clone	0.885	0.821	0.703	0.532	0.579	0.596	0.877	0.848	0.887	0.97	0.955	0.939	0.831	0.552	0.738	0.873	0.875	0.656	0.909	0.719	0.846	0.738	0.426	0.773	1	0.938	0.848	0.939	0.939	0.939		917.181	962.783	739.08	508.077	512.315	611.813	449.234	475.601	526.171	702.51
Firmicutes	Clostridia	Clostridiales	Peptostreptococcaceae	sf_5	2710	66939	AJ306755.1	DCP-dechlorinating consortium clone SHA-74	0.824	0.941	0.941	0.941	0.882	0.941	0.941	0.941	0.882	0.941	0.941	0.941	0.941	0.882	0.882	0.882	0.882	0.882	0.941	0.882	0.941	0.882	0.875	0.882	0.941	0.882	0.824	0.941	0.941	0.941		2566.17	2645.02	2379.97	2354.74	2138.02	1857.29	2224.11	2022.39	1797.38	2082.15
Firmicutes	Clostridia	Clostridiales	Peptostreptococcaceae	sf_5	2729	66940	AJ306754.1	DCP-dechlorinating consortium clone SHA-58	0.985	1	0.984	0.891	0.82	0.952	1	0.984	1	1	1	1	0.984	0.903	0.903	1	0.968	0.984	0.984	1	1	1	0.891	0.984	1	1	1	1	1	0.984		3188.04	3194.91	3040.87	2481.76	2489.67	2168.66	2574.07	2536.9	2219.93	2610.62
Firmicutes	Clostridia	Clostridiales	Peptococc/Acidaminococc	sf_11	534	66181	AJ488084.1	chlorobenzene-degrading consortium clone IIA-26	0.957	0.957	1	1	1	0.957	1	1	1	1	1	1	1	0.957	0.957	1	1	0.957	1	0.957	1	1	0.957	1	0.957	1	1	1	0.957	1		2997.27	2721.66	2353.6	2589.24	2515.51	2301.58	2606.16	2510.96	2249.41	2509.09
Actinobacteria	Actinobacteria	Actinomycetales	Streptosporangiaceae	sf_1	1158	12088	X89947.1	Streptosporangium roseum str. DSM43021T	0.688	0.95	0.778	0.722	0.688	0.812	0.789	0.895	0.842	0.947	0.947	0.85	0.895	0.737	0.737	0.737	0.889	0.667	0.85	0.737	0.9	0.684	0.5	0.667	1	0.9	0.85	0.947	1	0.947		448.352	615.032	638.173	1248.7	1380.78	1185.39	411.129	549.103	815.61	390.686
Proteobacteria	Deltaproteobacteria	Desulfovibrionales	Desulfovibrionaceae	sf_1	10292	33199	AF192154.1	Desulfovibrio subsp. desulfuricans str. MB; ATCC27774 subsp.	0.231	1	0.25	0.167	0.2	0.182	0.375	0.471	0.455	0.562	0.529	0.471	0.077	0.167	0.167	0.143	0.154	0.133	0.941	0.118	0.176	0.125	0.143	0.125	0.867	0.467	0.4	0.688	0.688	0.688		51.7329	363.08	82.7261	19.5414	15.729	28.2235	72.1983	105.929	87.5464	146.847
Firmicutes	Clostridia	Clostridiales	Peptococc/Acidaminococc	sf_11	242	63748	AJ493052.1	Desulfosporosinus orientis str. DSMZ 7493	1	1	1	1	0.938	1	1	1	1	1	1	1	1	0.938	0.875	1	1	1	1	1	1	1	1	1	1	1	1	1	1	1		3088.88	2959.24	2956.32	2258.01	2321.15	2241.49	2521.93	2232.08	2041.26	2466.49
Actinobacteria	Actinobacteria	Actinomycetales	Streptomycetaceae	sf_1	1340	11946	Y00411.1	Streptomyces coelicolor	0.812	1	0.882	0.938	0.733	0.933	0.824	1	0.941	1	0.941	0.824	1	0.882	0.824	0.941	0.941	0.812	0.812	0.933	0.938	0.765	0.875	0.875	1	1	0.882	1	1	1		402.008	545.098	544.538	513.94	387.607	451.576	308.848	386.966	837.944	359.867
Firmicutes	Bacilli	Bacillales	Bacillaceae	sf_1	3818	77543	AF372616.1	Bacillus licheniformis str. Mo1	0.883	0.866	0.795	0.547	0.571	0.614	0.89	0.867	0.863	0.916	0.892	0.951	0.915	0.622	0.841	0.875	0.866	0.716	0.988	0.772	0.866	0.79	0.582	0.829	0.952	0.878	0.807	0.905	0.917	0.892		1126.27	1456.15	1217.26	1119.72	1142.6	1105.27	877.409	907.966	946.93	1060.56
OP8	Unclassified	Unclassified	Unclassified	sf_3	69	73076	AJ306781.1	DCP-dechlorinating consortium clone SHA-124	0.857	0.818	0.857	0.857	0.947	0.9	0.818	0.864	0.85	0.864	0.864	0.818	0.857	0.85	0.85	0.85	0.85	0.85	0.773	0.81	0.857	0.85	0.81	0.81	0.875	0.905	0.818	0.909	0.955	0.909		2562.93	2167.94	2177.24	2113.41	2546.97	2606.58	1959.38	1908.89	1891.18	2151.04
Firmicutes	Clostridia	Clostridiales	Unclassified	sf_17	926	NA			1	0.943	0.941	1	0.97	1	0.971	0.971	1	1	1	0.971	1	1	0.97	0.971	1	0.971	0.971	1	0.941	1	0.971	1	0.971	1	0.941	1	1	1		2740.77	2012.74	1941.79	2197.43	2106.56	2000.23	1877.15	1782.42	1705.37	1978.81
Firmicutes	Bacilli	Bacillales	Bacillaceae	sf_1	305	14564	M77488.1	Bacillus thermoleovorans	1	0.978	1	0.857	0.878	0.881	1	0.977	0.977	1	1	0.978	0.955	0.884	0.956	1	0.932	0.932	1	0.955	1	0.953	0.881	0.932	1	1	0.977	1	1	1		2524.13	2280.02	1823.61	1934.6	2043.64	2035.73	1758.83	1879.71	1662.49	2073.99
Proteobacteria	Epsilonproteobacteria	Campylobacterales	Campylobacteraceae	sf_3	10474	11181	AB013833.1	NB1-l clone NB1-l	0.75	0.929	1	0.846	0.846	0.929	0.846	0.786	0.929	0.929	1	0.929	0.857	0.846	0.769	0.929	0.929	0.929	1	0.929	1	0.929	1	0.929	0.929	1	1	1	1	1		1757.84	1399.63	1705.43	1316.12	1134.73	1180.83	1523.18	1334.93	1092.54	1203.79
Firmicutes	Bacilli	Bacillales	Bacillaceae	sf_1	3550	81816	AF142677.4	Bacillus megaterium str. QM B1551	0.962	0.927	0.85	0.701	0.708	0.746	0.963	0.963	0.936	0.988	0.975	0.976	0.914	0.671	0.877	0.95	0.975	0.823	0.988	0.85	0.975	0.873	0.684	0.914	0.988	0.975	0.938	0.975	0.963	0.963		1824.66	1902.57	1659.98	1261.4	1236.97	1467.62	1302.58	1343.57	1331.06	1616.23
Chloroflexi	Chloroflexi-4	Unclassified	Unclassified	sf_2	2344	65684	AF507700.1	forest soil clone C083	0.966	0.931	0.923	0.963	0.963	0.963	0.964	0.897	0.963	0.897	0.897	0.966	0.963	0.926	0.929	0.963	0.963	0.929	0.966	0.963	0.897	0.963	0.963	0.929	0.966	0.963	0.929	0.963	0.929	0.929		2668.55	2051.06	2405.42	2350.83	2461.58	2440.88	2386.55	1939.16	2326.23	2123.85
Actinobacteria	Actinobacteria	Actinomycetales	Micrococcaceae	sf_1	1610	12415	X86595.1	Arthrobacter sp str. AC-51	0.848	0.98	0.938	0.826	0.844	0.867	0.816	0.875	0.826	0.959	0.98	0.898	0.796	0.844	0.809	0.851	0.854	0.851	0.98	0.939	1	0.826	0.822	0.796	1	0.98	0.857	1	1	1		2248.23	2155.49	2368.15	2978.11	3242.42	2748.6	2003.5	1987.8	2327.13	1944.37
Actinobacteria	Actinobacteria	Actinomycetales	Kineosporiaceae	sf_1	1581	32913	AJ293746.1	Cryptosporangium aurantiacum str. IMSNU 22120	0.8	0.968	0.867	0.933	0.897	0.931	0.844	0.968	0.968	0.903	0.875	0.875	0.969	0.906	1	0.867	0.867	0.75	0.781	0.806	0.871	0.933	0.759	0.867	1	0.903	0.719	0.938	0.938	0.906		1022.8	1186	861.806	1009.31	869.588	1086.15	758.082	940.393	1288.18	852.077
Firmicutes	gut clone group	Unclassified	Unclassified	sf_1	4616	99651	AB185532.1	rumen clone F23-C12	0.964	1	0.964	0.926	0.962	0.962	0.964	0.964	0.964	0.964	0.964	0.964	0.964	0.964	0.964	0.964	0.964	1	1	1	0.964	0.964	0.964	1	1	0.964	0.964	1	1	0.964		3711.83	3491.89	3258.13	3052.37	3126.7	2755.89	3079.46	2920.62	2284.25	3052.07
Firmicutes	Clostridia	Clostridiales	Clostridiaceae	sf_12	4156	68943	AF407388.1	MCB-contaminated groundwater-treating reactor clone RA9C1	0.911	0.932	0.953	0.932	0.953	0.955	0.911	0.911	0.932	0.956	0.911	0.933	0.932	0.905	0.86	0.889	0.932	0.909	0.911	0.889	0.889	0.911	0.889	0.909	0.977	0.932	0.889	0.933	0.933	0.933		4023.31	3663.37	3404.5	3316.18	3214.33	3137.36	3801.44	3881.55	3467.91	3539.75
Actinobacteria	Actinobacteria	Actinomycetales	Kineosporiaceae	sf_1	1087	12700	AB003931.1	Kineosporia aurantiaca str. JCM3230	0.962	1	0.963	1	1	1	0.964	1	1	1	0.929	0.893	1	0.964	0.964	0.889	0.889	0.786	0.963	1	1	0.852	0.8	0.885	1	1	0.893	0.964	0.964	0.964		1915.19	2160.28	1831.79	2345.95	2350.36	2307.04	1518.17	1752.16	1911.73	1472.1
Proteobacteria	Gammaproteobacteria	Enterobacteriales	Enterobacteriaceae	sf_1	9060	108534	AJ853891.1	Enterobacter ludwigii str. EN-119 = DSMZ 16688	0.962	0.968	0.968	0.855	0.799	0.837	0.981	0.974	0.968	0.974	0.987	0.981	0.961	0.947	0.955	0.987	0.961	0.929	0.987	0.981	1	0.981	0.923	0.981	0.974	0.987	0.981	1	0.994	1		4239.94	3384.59	2104.51	1522.28	1500.99	1616.02	2390.56	2553.11	1903.69	2482.81
Unclassified	Unclassified	Unclassified	Unclassified	sf_75	6392	NA			0.786	0.923	0.6	0.714	0.571	0.769	0.857	0.714	0.6	0.846	0.929	0.929	0.643	0.538	0.667	0.846	0.533	0.615	0.857	0.714	0.857	0.6	0.5	0.467	0.857	0.929	0.643	0.857	0.857	0.929		135.799	168.607	174.543	87.9364	101.115	146.58	137.377	110.253	117.92	130.531
Coprothermobacteria	Unclassified	Unclassified	Unclassified	sf_1	751	79191	AJ431258.1	Coprothermobacter sp. str. Dex80-3	1	0.929	0.929	0.929	0.929	0.929	0.929	0.929	0.929	1	0.929	1	0.929	0.929	0.929	0.929	0.929	0.929	0.929	1	0.929	0.929	1	0.929	1	1	0.929	0.929	1	1		2653.47	2913.26	2829.96	2534.52	2611.01	2964.38	2085.73	2078.59	2367.32	2401.23
Firmicutes	Clostridia	Clostridiales	Peptostreptococcaceae	sf_5	2993	59533	AF538856.1	oral clone P2PB_46 P3	1	1	1	1	0.938	1	1	0.941	0.941	0.941	0.941	0.941	1	0.941	0.882	0.882	1	1	0.938	0.941	0.941	1	1	0.941	0.941	0.941	1	1	1	1		2544.61	2285.77	2297.24	1784.13	2004.32	1759.87	1685.63	1809.45	1696.43	1770.33
Proteobacteria	Gammaproteobacteria	Pasteurellales	Pasteurellaceae	sf_1	9349	18332	AF227861.1	Pasteurella sp. str. 91985	0.909	0.6	0.75	0.714	0.833	0.714	0.667	0.667	0.625	0.667	0.75	0.818	0.75	0.714	0.5	0.75	0.75	0.625	0.7	0.714	0.75	0.625	0.667	0.75	0.7	0.75	0.625	0.75	0.75	0.75		1265.3	612.158	471.811	405.485	453.893	518.948	568.561	618.281	493.118	556.569
Cyanobacteria	Unclassified	Unclassified	Unclassified	sf_5	5030	45088	AY034793.1	Hapalosiphon welwitschii	1	1	1	1	1	1	1	1	1	1	1	1	1	1	1	1	1	1	1	1	1	1	1	1	1	1	1	1	1	1		2066.08	2345.17	2009.97	3677.7	3513.18	3530.67	3452.48	2886.03	3000.7	3956.72
Firmicutes	Bacilli	Bacillales	Alicyclobacillaceae	sf_1	3864	14347	X60741.1	Alicyclobacillus acidocaldarius str. ATCC 43034	0.8	0.857	0.8	0.789	0.833	0.762	0.789	0.833	0.8	0.762	0.85	0.619	0.944	0.833	0.684	0.882	0.8	0.667	0.722	0.842	0.667	0.889	0.833	0.833	0.727	0.895	0.842	0.8	0.8	0.85		348.119	435.887	910.896	589.174	731.397	719.244	402.104	452.902	563.691	451.42
Bacteroidetes	KSA1	Unclassified	Unclassified	sf_1	5951	79775	AF449785.1	CFB group clone ML615J-4	1	1	1	1	1	1	1	1	0.952	1	1	1	0.952	0.952	0.952	1	1	1	0.952	0.952	1	0.952	1	1	1	1	1	1	1	1		4021.15	3136.47	4070.85	4442.74	4701.84	3986.8	3629.97	3165.99	3224.03	3573.28
Proteobacteria	Epsilonproteobacteria	Campylobacterales	Campylobacteraceae	sf_3	10461	11183	AB015259.1	deepest cold-seep area Japan Trench clone JTB360 proteobacterium	0.857	0.786	0.786	0.867	0.8	0.867	0.846	0.867	0.857	0.867	0.867	0.929	0.733	0.786	0.8	0.867	0.8	0.867	0.867	0.867	0.867	0.867	0.786	0.867	0.929	0.867	0.867	0.867	0.867	0.867		4009.3	3922.98	4357.21	4131.06	3791.81	3802.89	4655.79	3808.05	3630.49	3755.48
Proteobacteria	Gammaproteobacteria	Acidithiobacillales	Acidithiobacillaceae	sf_1	8304	7642	AB015250.1	deepest cold-seep area Japan Trench clone JTB35 proteobacterium	0.571	0.714	0.818	0.733	0.733	0.733	0.714	0.769	0.769	0.667	0.714	0.714	0.786	0.769	0.643	0.75	0.643	0.692	0.714	0.75	0.692	0.692	0.286	0.643	0.929	0.769	0.643	0.769	1	0.833		506.551	854.53	764.534	287.259	248.293	632.753	400.099	516.676	835.264	563.821
Firmicutes	Bacilli	Bacillales	Staphylococcaceae	sf_1	3545	NA			0.978	0.903	0.904	0.845	0.819	0.852	0.904	0.904	0.917	0.94	0.941	0.934	0.873	0.775	0.843	0.924	0.872	0.797	0.927	0.917	0.947	0.88	0.785	0.874	0.942	0.919	0.881	0.904	0.918	0.91		2547.84	2335.59	2041.79	2091.91	2139.14	2121.31	1914.26	1930.51	1970.69	2064.93
Chloroflexi	Anaerolineae	Chloroflexi-1a	Unclassified	sf_1	766	56469	AJ278174.1	anaerobic bioreactor clone SHD-245	0.789	0.737	0.842	0.75	0.842	0.8	0.75	0.85	0.842	0.727	0.952	0.81	0.8	0.842	0.85	0.8	0.842	0.85	0.842	0.895	0.895	0.895	0.842	0.8	0.81	0.85	0.75	0.857	0.905	0.857		2416.36	2208.17	2265.42	1758.73	1512.23	1463.07	1993.47	2212.63	1965.33	2042.27
Firmicutes	Bacilli	Bacillales	Bacillaceae	sf_1	829	78768	AY191842.2	Geobacillus sp. str. YMTC1049	0.967	0.983	0.982	0.891	0.889	0.873	0.983	0.966	0.966	1	1	0.983	0.914	0.891	0.949	0.966	0.912	0.897	0.984	0.948	0.983	0.964	0.873	0.915	1	0.983	0.966	0.983	0.983	0.983		2530.6	2147.82	1991.79	2214.04	2285.2	2218.73	1880.16	1884.03	1824.18	2106.62
Proteobacteria	Alphaproteobacteria	Bradyrhizobiales	Methylobacteriaceae	sf_1	7605	68458	AF459799.1	Tetraponera binghami symbiont	0.7	0.92	0.731	0.731	0.731	0.76	0.667	0.808	0.76	0.846	0.852	0.821	0.731	0.654	0.593	0.625	0.667	0.704	0.846	0.615	0.692	0.679	0.593	0.607	0.828	0.885	0.643	0.885	0.885	0.92		2649.15	1829.77	1690.88	2299.05	2435.74	2309.77	1825.01	1986.72	2011.78	1881.82
Firmicutes	Mollicutes	Entomoplasmatales	Entomoplasmataceae	sf_1	4074	41875	AF371522.1	swine intestine clone p-2013-s959-5	0.933	1	1	0.929	0.929	1	0.933	0.933	0.875	0.938	1	0.938	0.933	0.933	0.933	0.875	0.875	0.875	1	0.933	0.938	0.938	0.929	0.875	0.938	0.933	0.875	1	1	1		1680.24	1643.92	1832.7	1221.34	1307.75	1667.92	1426.92	1305.74	1412.36	1549.15
Proteobacteria	Gammaproteobacteria	Legionellales	Legionellaceae	sf_1	8193	7916	Z49731.1	Legionella parisiensis	1	0.895	0.895	0.842	0.85	0.842	0.941	0.944	0.941	1	0.944	0.895	0.889	0.941	0.941	1	0.895	1	0.895	0.947	0.85	0.842	0.944	0.895	0.9	0.889	0.85	0.857	0.95	0.905		2254.69	1702.35	1510.89	1497.85	1415.61	1483.1	2320.37	2023.47	1985.87	1876.38
Actinobacteria	Actinobacteria	Actinomycetales	Actinomycetaceae	sf_1	1684	78533	AJ428402.1	Varibaculum cambriense str. CCUG 44998	0.944	0.972	0.971	0.944	0.972	0.944	0.917	0.972	0.917	0.944	0.972	0.944	0.917	0.917	0.917	0.971	1	0.861	0.917	0.944	1	0.943	0.941	0.944	0.944	0.944	0.944	0.972	1	1		2806.51	2554.97	2931.78	2977.14	3261.52	2920.68	2281.26	2172.63	2356.6	2229.9
Firmicutes	Bacilli	Lactobacillales	Enterococcaceae	sf_1	3598	20568	AJ301840.1	Enterococcus solitarius str. DSM 5634	1	0.963	0.963	0.88	0.84	0.88	0.963	0.963	0.963	1	1	0.926	0.963	0.92	0.963	1	0.962	0.926	1	0.963	1	0.846	0.846	0.963	1	0.926	0.923	1	1	1		3241.93	3162.34	2949.96	3331.81	3091.87	2636.62	2894.95	2983.32	2626.39	2938.76
Natronoanaerobium	Unclassified	Unclassified	Unclassified	sf_1	3570	63836	AF454298.1	Bacillus sp. clone ML1228J-1	0.846	0.885	1	0.962	0.885	0.923	0.962	0.962	0.962	0.962	0.962	0.962	0.923	0.885	0.962	0.962	0.962	0.923	1	0.962	0.962	0.962	0.962	0.962	0.962	0.962	0.962	0.962	0.923	0.962		3869.19	3509.13	3555.4	3210.66	3104.23	3259.36	2863.86	2995.21	2890.82	3264.18
Actinobacteria	Actinobacteria	Rubrobacterales	Rubrobacteraceae	sf_1	1739	NA			0.933	1	0.867	0.867	0.812	0.867	0.933	0.933	0.867	0.875	0.875	0.875	0.867	0.812	0.867	0.933	0.867	0.867	0.938	1	0.812	0.933	0.812	0.929	0.938	0.875	0.875	0.938	0.938	0.875		2680.41	2645.98	2338.15	2902.88	2515.51	2478.21	2852.83	2220.19	2099.33	2213.59
Actinobacteria	Actinobacteria	Actinomycetales	Streptomycetaceae	sf_1	1786	11832	X79851.1	Streptomyces bikiniensis str. DSM40581	0.923	0.963	0.889	0.962	0.92	0.96	0.963	1	0.963	1	0.963	0.889	1	0.963	0.963	1	0.963	0.962	0.962	0.96	0.962	0.926	0.923	0.962	1	1	0.926	1	1	1		2113.5	1913.11	1720.88	1576.02	1219	1463.98	2265.22	2339.09	2396.8	1947.09
Spirochaetes	Spirochaetes	Spirochaetales	Spirochaetaceae	sf_1	6466	81100	AY214182.1	benzene-contaminated groundwater clone ZZ12C6	0.795	0.795	0.865	0.8	0.838	0.769	0.744	0.816	0.821	0.85	0.875	0.875	0.868	0.789	0.775	0.789	0.718	0.769	0.775	0.811	0.795	0.789	0.861	0.769	0.923	0.895	0.763	0.8	0.9	0.842		1612.34	1721.51	1971.79	1121.68	1121.25	1410.26	1559.28	1578.13	1454.34	1711.41
Firmicutes	Clostridia	Clostridiales	Clostridiaceae	sf_12	4614	81208	AB093546.1	Clostridium sp. str. JC3	0.955	0.939	0.985	0.906	0.918	0.954	0.969	0.954	0.969	0.969	0.969	0.969	0.969	0.892	0.889	0.969	0.953	0.953	0.955	0.954	0.969	0.969	0.891	0.954	0.985	0.969	0.954	0.969	0.985	0.985		3466.1	2939.12	2662.69	2123.18	2209.92	2277	2679.36	2780.1	2353.93	2752.93
Firmicutes	Clostridia	Clostridiales	Clostridiaceae	sf_12	2794	51694	AJ320233.1	Caminicella sporogenes str. AM1114	0.909	0.889	0.909	0.841	0.857	0.878	0.844	0.909	0.884	0.932	0.889	0.955	0.822	0.881	0.884	0.909	0.909	0.867	0.87	0.932	0.909	0.909	0.909	0.909	0.933	0.955	0.911	0.933	0.953	0.933		3203.13	3260.05	3177.23	2722.12	2478.44	2597.47	2841.8	2998.45	2510.26	3012.18
Firmicutes	Catabacter	Unclassified	Unclassified	sf_4	4503	78199	AB088976.1	termite gut homogenate clone Rs-H83 bacterium	1	1	1	1	1	1	0.973	0.973	0.973	1	1	1	1	0.973	1	0.946	0.973	1	1	1	1	0.973	0.973	0.973	1	1	1	1	1	1		3382.04	3078.03	2770.87	2684.99	2743.58	2724.93	3122.57	2767.13	2616.56	2562.58
Proteobacteria	Gammaproteobacteria	Unclassified	Unclassified	sf_3	8245	NA			1	1	1	1	1	1	1	1	1	1	1	1	1	1	1	1	1	1	1	1	1	1	1	1	1	1	1	1	1	1		3964.03	2964.99	2238.15	3811.56	3850.23	3228.4	2844.81	2720.65	2400.38	2754.75
Actinobacteria	Actinobacteria	Actinomycetales	Unclassified	sf_3	1130	73976	X94155.2	Georgenia muralis str. 1A-C	0.8	0.88	0.955	0.864	0.864	0.955	0.792	0.833	0.8	0.955	0.913	0.957	0.917	0.792	0.875	0.952	1	0.826	1	0.913	0.957	0.87	0.864	0.875	0.92	0.957	0.913	0.875	1	0.958		1034.66	1031.76	1169.98	1129.49	1045.98	1416.64	722.985	716.644	1184.56	873.832
Firmicutes	Bacilli	Bacillales	Halobacillaceae	sf_1	3344	111708	AY881246.1	Halobacillus yeomjeoni str. MSS-402	1	0.941	1	0.929	0.929	0.929	1	1	1	1	1	0.938	1	0.867	0.938	1	1	0.933	1	1	1	1	0.929	1	1	1	1	1	1	1		1722.27	1748.34	1636.34	1120.7	996.543	1246.39	1042.86	1250.61	1192.6	1787.55
Proteobacteria	Gammaproteobacteria	Enterobacteriales	Enterobacteriaceae	sf_1	8649	10394	X75277.1	Yersinia aldovae	0.647	0.842	0.75	0.667	0.706	0.824	0.778	0.7	0.895	0.842	0.789	0.895	0.889	0.889	0.85	0.789	0.765	0.667	0.895	0.737	0.789	0.667	0.588	0.632	0.842	0.895	0.789	0.8	0.947	0.842		1142.43	866.984	1037.26	1220.36	1334.72	1368.38	1124.09	816.088	1093.44	1061.47
OP9/JS1	JS1	Unclassified	Unclassified	sf_1	2491	63112	AY093469.1	deep marine sediment clone MB-B2-103	0.793	0.931	0.931	0.929	0.862	0.897	0.897	0.897	0.931	0.966	0.966	0.966	0.931	0.862	0.793	0.897	0.862	0.897	0.897	0.897	0.862	0.897	0.857	0.897	1	0.931	0.862	0.931	1	1		2483.18	2177.52	1792.7	1942.42	1750.41	2294.3	1662.57	1874.3	1695.54	1831.97
Proteobacteria	Gammaproteobacteria	Enterobacteriales	Enterobacteriaceae	sf_1	8530	72866	AJ489826.1	Enterobacteriaceae CF01Ent-1	0.974	0.974	0.951	0.918	0.842	0.833	0.982	0.969	0.978	0.969	0.978	0.982	0.982	0.969	0.973	0.987	0.964	0.955	0.987	0.982	0.991	0.982	0.96	0.982	0.978	0.973	0.982	1	0.991	0.991		4116	3147.97	2009.06	1383.53	1316.74	1366.56	2185	2358.55	1934.95	2355
Actinobacteria	Actinobacteria	Actinomycetales	Mycobacteriaceae	sf_1	1312	NA			0.7	0.714	0.889	0.875	0.875	0.875	0.7	0.8	0.778	0.889	1	0.692	0.8	0.667	0.6	0.778	0.889	0.5	0.714	0.889	0.818	0.7	0.875	0.5	0.929	1	0.556	1	1	1		329.797	436.845	853.624	604.807	343.79	903.152	230.633	259.419	718.237	425.132
Firmicutes	Clostridia	Clostridiales	Peptostreptococcaceae	sf_5	2694	59564	AY134903.1	oral periodontitis clone FX028	0.972	0.986	0.971	0.871	0.864	0.926	0.971	0.957	0.971	0.971	0.971	0.957	0.943	0.882	0.871	0.971	0.942	0.971	0.972	0.971	0.971	0.971	0.884	0.971	0.986	0.971	0.957	0.971	0.971	0.957		3721.53	3520.63	3329.04	2719.19	2693.03	2441.79	3035.34	2892.52	2385.19	3016.72
Nitrospira	Nitrospira	Nitrospirales	Nitrospiraceae	sf_2	542	63221	AF524005.1	forested wetland clone FW19	0.9	1	1	1	1	1	0.917	1	1	0.917	0.917	1	1	1	1	1	1	0.909	0.909	0.909	0.909	1	1	0.909	0.917	0.909	1	0.833	0.833	0.833		3220.37	2923.8	2777.23	2661.54	3005.36	2786.84	2315.36	2677.42	2366.43	2617.87
Chloroflexi	Anaerolineae	Unclassified	Unclassified	sf_7	8542	7895	X84607.2	sludge clone SBR2076	0.8	0.636	0.636	0.889	0.7	0.818	0.727	0.667	0.636	0.909	0.833	0.909	0.727	0.8	0.7	0.583	0.727	0.667	0.667	0.636	0.667	0.636	0.583	0.583	0.909	0.833	0.583	0.909	0.833	0.75		1506.72	1230.06	1272.71	1873.05	1476.28	1473.08	1491.09	1258.18	1475.78	1319.81
Bacteroidetes	Sphingobacteria	Sphingobacteriales	Flexibacteraceae	sf_10	5253	80101	AF449765.1	CFB group clone ML1218M-32	0.667	0.75	0.667	0.75	0.75	0.833	0.833	0.833	0.909	0.833	0.909	0.917	0.909	0.833	0.909	0.909	0.833	0.833	0.727	0.7	0.727	0.909	0.833	0.909	0.833	0.909	0.833	0.818	0.909	0.833		2040.22	1956.22	1969.97	1872.07	1916.69	1982.93	2180.99	2088.32	2504	2088.5
Unclassified	Unclassified	Unclassified	Unclassified	sf_75	6445	NA			0.824	0.722	0.778	0.667	0.667	0.842	0.632	0.722	0.765	0.632	0.842	0.722	0.667	0.812	0.75	0.722	0.765	0.765	0.667	0.722	0.706	0.706	0.684	0.722	1	0.737	0.7	0.842	0.947	0.895		1561.69	1448.49	1705.43	1704.99	1488.64	1666.1	1326.64	1555.43	1596.38	1143.05
Proteobacteria	Gammaproteobacteria	Pseudomonadales	Moraxellaceae	sf_3	8604	56708	AB087260.2	Moraxella oblonga str. IAM 14971	0.862	1	0.966	0.931	0.931	0.966	1	1	1	1	1	1	1	0.931	0.931	1	0.966	0.931	1	1	1	1	0.931	1	1	1	1	1	1	1		4147.25	3383.63	3160.86	3455.9	3632.27	3210.2	3034.33	3006.02	2431.64	3226.11
Bacteroidetes	Flavobacteria	Flavobacteriales	Flavobacteriaceae	sf_1	6058	2362	L10947.1	marine snow clone AGG50	0.75	0.867	0.938	0.857	0.786	0.929	0.8	0.812	1	0.733	0.812	0.812	0.857	0.857	0.929	0.8	0.8	0.6	0.929	0.786	0.714	0.8	0.688	0.867	0.875	0.75	0.667	0.667	0.812	0.867		888.081	1042.3	1128.17	2121.22	2016.68	1989.3	1515.16	1103.61	1680.35	895.587
Proteobacteria	Gammaproteobacteria	Enterobacteriales	Enterobacteriaceae	sf_1	8362	44635	AF453251.1	Klebsiella pneumoniae str. ASR1	0.982	1	0.982	0.945	0.72	0.84	1	1	1	1	1	1	1	1	1	1	1	1	1	1	1	1	0.964	1	1	1	1	1	1	1		4015.77	3265.8	1851.79	820.74	699.939	1032.43	1905.23	2242.89	1749.14	2180.05
Proteobacteria	Deltaproteobacteria	Unclassified	Unclassified	sf_9	9876	63111	AY093471.1	deep marine sediment clone MB-B2-106	0.762	0.95	0.85	0.905	0.95	0.95	1	1	1	1	0.952	1	0.905	0.947	1	0.95	0.95	0.95	0.905	0.905	0.95	0.95	0.95	0.95	0.952	0.952	0.95	0.952	0.952	0.952		2691.19	2486.95	2316.33	2156.4	2158.24	2392.62	2538.97	2507.72	2195.81	2455.61
Actinobacteria	Actinobacteria	Actinomycetales	Unclassified	sf_3	1405	12443	X80744.1	Arthrobacter ureafaciens str. DSM 20126	1	1	1	1	1	1	1	1	1	1	1	1	1	1	1	1	1	1	1	1	1	1	1	1	1	1	1	1	1	1		2678.25	3344.36	3078.14	3398.26	3525.54	3273.93	2704.43	2817.94	3071.27	2540.82
Proteobacteria	Deltaproteobacteria	Desulfovibrionales	Desulfovibrionaceae	sf_1	9792	NA			0.579	0.789	0.444	0.474	0.529	0.684	0.632	0.579	0.579	0.65	0.7	0.75	0.5	0.533	0.588	0.579	0.5	0.45	0.65	0.579	0.55	0.588	0.444	0.556	0.947	0.632	0.632	0.579	0.75	0.65		309.32	302.726	268.178	248.176	377.495	416.069	348.958	231.315	348.399	235.681
Firmicutes	Bacilli	Bacillales	Bacillaceae	sf_1	3540	14545	AB034836.1	Geobacillus thermoleovorans str. B23	0.957	0.979	1	0.886	0.884	0.864	0.978	0.978	0.978	1	1	0.979	0.911	0.884	0.935	0.978	0.889	0.889	0.979	0.956	0.978	0.977	0.841	0.891	1	1	0.957	1	1	1		2443.3	2196.68	1823.61	1865.23	1972.86	1973.82	1685.63	1852.68	1637.47	2046.8
Proteobacteria	Betaproteobacteria	Rhodocyclales	Rhodocyclaceae	sf_1	7857	6722	AF170348.1	Azospira oryzae str. PS	0.857	0.918	0.934	0.817	0.772	0.782	0.905	0.903	0.918	0.934	0.951	0.906	0.852	0.881	0.852	0.883	0.852	0.85	0.969	0.951	0.934	0.917	0.867	0.883	0.891	0.934	0.855	0.934	0.934	0.918		2759.09	2616.28	2862.69	1825.17	1614.47	1926.48	2730.5	2723.9	2298.54	2801.88
Firmicutes	Bacilli	Bacillales	Bacillaceae	sf_1	3763	104365	AY672761.1	Geobacillus stearothermophilus	1	0.974	1	0.944	0.944	0.972	1	1	1	1	1	0.974	1	0.919	0.947	1	0.973	0.919	1	1	1	0.973	0.944	0.973	1	1	1	1	1	1		2844.23	2470.67	1996.33	2198.41	2258.23	2330.71	1982.44	2120.75	1870.63	2322.36
Firmicutes	Clostridia	Clostridiales	Peptococc/Acidaminococc	sf_11	992	34224	AJ229198.1	anoxic bulk soil flooded rice microcosm clone BSV43 clone	1	1	1	1	1	0.917	1	1	1	1	1	1	1	0.917	0.917	1	1	0.917	1	1	1	1	1	1	1	1	1	1	1	1		4630.09	3844.43	3518.13	4360.67	4919.8	3911.23	3774.36	3846.96	3408.05	3591.41
Proteobacteria	Gammaproteobacteria	Enterobacteriales	Enterobacteriaceae	sf_1	8631	63937	AF476108.1	Planococcus ficus symbiont	0.9	0.961	0.936	0.867	0.818	0.822	0.902	0.902	0.935	0.94	0.96	0.941	0.913	0.913	0.851	0.9	0.878	0.92	0.941	0.9	0.941	0.918	0.878	0.94	0.98	0.961	0.922	0.941	0.961	0.941		3606.21	2421.81	1629.07	1585.79	1524.59	1624.22	1965.4	2023.47	1998.38	2165.54
Firmicutes	Clostridia	Clostridiales	Peptococc/Acidaminococc	sf_11	31	13899	Y10164.1	Dehalobacter restrictus str. TEA	0.833	0.878	0.816	0.812	0.787	0.816	0.796	0.816	0.913	0.837	0.837	0.857	0.851	0.723	0.735	0.833	0.833	0.78	0.816	0.792	0.812	0.816	0.809	0.796	0.878	0.87	0.796	0.82	0.857	0.878		2817.29	2588.5	2299.06	1820.28	1884.11	1789.92	1820	1919.7	1846.51	2053.14
Firmicutes	Clostridia	Clostridiales	Clostridiaceae	sf_12	3219	60603	AF407695.1	Great Artesian Basin clone R82	0.966	1	0.966	0.862	0.828	0.862	0.897	0.931	0.931	0.931	0.931	0.931	0.897	0.893	0.897	0.931	0.862	0.929	0.966	1	0.931	0.897	0.897	0.929	1	0.931	0.897	0.966	0.966	0.931		3040.38	3463.15	3280.86	2739.71	2496.41	2572.89	2991.21	3051.41	2595.12	3118.24
TM7	TM7-3	Unclassified	Unclassified	sf_1	2697	100865	AJ576410.1	midgut homogenate Pachnoda ephippiata larva clone PeM47	0.933	1	0.938	0.933	0.867	0.933	0.938	0.875	0.933	0.933	1	0.938	0.867	0.867	0.867	0.933	0.938	0.933	1	0.938	1	0.875	0.933	0.938	1	1	1	1	0.938	1		2299.96	2552.09	2901.78	2514.01	2512.14	2858.77	1970.41	2060.22	2270.85	2229
Firmicutes	Clostridia	Clostridiales	Clostridiaceae	sf_12	4461	66188	AJ488075.1	chlorobenzene-degrading consortium clone IA-24	0.893	0.964	0.929	0.84	0.84	0.88	0.778	0.808	0.846	0.885	0.852	0.821	0.846	0.808	0.84	0.84	0.875	0.84	0.893	0.923	0.852	0.846	0.808	0.846	0.926	0.92	0.852	0.923	0.962	0.923		2230.98	2491.74	2233.6	2030.35	2363.84	2599.29	1941.33	2095.89	2307.47	2025.04
Actinobacteria	Actinobacteria	Coriobacteriales	Coriobacteriaceae	sf_1	1800	75442	AJ534681.1	ground water deep-well injection disposal site radioactive wastes Tomsk-7 clone S15A-MN100	0.833	1	0.909	1	0.917	1	0.917	0.909	0.833	0.917	0.917	0.833	0.833	0.833	0.75	0.833	0.833	0.909	0.917	0.75	0.833	0.833	0.818	0.833	0.917	0.917	0.75	0.917	0.917	0.917		3121.22	2752.32	2583.6	3397.28	2888.51	2951.63	2578.08	2727.14	2252.98	2428.42
Proteobacteria	Gammaproteobacteria	Enterobacteriales	Enterobacteriaceae	sf_1	8740	73843	AF373201.1	Erwinia chrysanthemi str. 573	0.912	0.942	0.861	0.917	0.784	0.778	0.986	0.957	0.943	0.979	0.979	0.979	0.935	0.933	0.956	0.971	0.935	0.957	0.986	0.979	0.986	0.971	0.928	0.986	0.964	0.971	0.971	1	0.986	0.993		3959.72	2844.28	1760.88	1154.9	1127.99	1184.48	1923.28	2156.42	1775.94	2369.5
Acidobacteria	Acidobacteria	Acidobacteriales	Acidobacteriaceae	sf_14	6425	60581	AF407719.1	Great Artesian Basin clone B27	0.959	0.98	0.939	0.898	0.894	0.957	0.941	0.961	1	0.98	1	1	0.941	0.92	0.94	0.918	0.96	0.922	0.961	0.96	0.96	0.94	0.939	0.96	1	0.98	0.98	0.98	0.961	0.98		2560.78	2096.09	2133.61	1956.1	1990.84	2057.58	2037.6	2117.51	2157.39	2101.19
Proteobacteria	Epsilonproteobacteria	Campylobacterales	Campylobacteraceae	sf_3	10583	NA			0.417	0.667	0.615	0.769	0.818	0.75	0.692	0.692	0.417	0.714	0.714	0.846	0.5	0.417	0.455	0.364	0.333	0.308	0.5	0.571	0.429	0.5	0.333	0.385	0.923	0.615	0.538	0.538	0.692	0.538		182.143	660.057	730.898	420.141	417.941	556.276	556.528	522.08	354.652	474.081
Cyanobacteria	Cyanobacteria	Geitlerinema	Unclassified	sf_1	4999	25443	AB039010.1	Geitlerinema sp. str. PCC 7105	0.944	0.868	0.895	0.927	0.95	0.951	0.925	0.902	0.925	1	0.927	0.927	0.975	0.925	0.921	0.875	0.9	0.878	0.868	0.872	0.872	0.897	0.947	0.95	0.884	0.897	0.872	0.925	0.878	0.878		2061.77	2005.08	1954.52	1800.74	1938.03	2115.85	1902.22	1921.86	1882.25	1865.5
Firmicutes	Bacilli	Bacillales	Bacillaceae	sf_1	3419	86553	AY228462.1	Bacillus algicola str. KMM 3737	0.968	0.925	0.924	0.774	0.695	0.783	0.985	0.985	0.985	1	1	1	0.94	0.839	0.939	0.985	0.939	0.848	1	0.954	0.97	0.894	0.734	0.91	1	0.97	0.985	0.97	0.985	0.97		1667.31	2010.83	1778.16	1445.09	1484.14	1466.71	1389.82	1384.65	1480.25	1646.14
Gemmatimonadetes	Unclassified	Unclassified	Unclassified	sf_5	227	75259	AJ519397.1	uranium mining waste pile clone JG37-AG-36	1	0.923	0.818	0.909	0.909	1	0.846	0.923	0.846	1	1	1	0.833	0.833	0.923	0.917	0.917	0.923	0.923	0.917	0.923	0.917	0.818	0.923	1	0.846	1	0.923	0.923	0.923		2350.61	1671.7	1538.16	2263.87	2021.17	2237.85	1600.39	1646.23	1581.19	1696.9
Firmicutes	Clostridia	Clostridiales	Clostridiaceae	sf_12	3003	79318	AJ431244.1	Clostridium sp. str. Dex60-75	0.891	0.86	0.857	0.8	0.83	0.83	0.804	0.873	0.8	0.891	0.842	0.875	0.804	0.815	0.796	0.855	0.873	0.8	0.81	0.891	0.836	0.855	0.836	0.855	0.893	0.893	0.86	0.895	0.927	0.877		2710.59	2781.05	2673.6	2471.99	2253.74	2286.1	2595.13	2483.94	2126.13	2553.51
Actinobacteria	Actinobacteria	Actinomycetales	Actinomycetaceae	sf_1	2039	60136	AJ421779.1	Actinomyces cardiffensis str. CCUG 44997	0.794	0.853	0.879	0.939	0.906	0.909	0.879	0.848	0.853	0.906	0.879	0.848	0.818	0.818	0.818	0.875	0.909	0.818	0.875	0.844	0.879	0.824	0.853	0.879	0.853	0.853	0.879	0.853	0.941	0.941		2103.8	1811.57	2280.88	2454.4	2769.42	2377.15	1714.71	1594.34	1739.31	1957.06
Bacteroidetes	Bacteroidetes	Bacteroidales	Unclassified	sf_15	6324	82061	AY216445.1	temperate estuarine mud clone KM02	0.955	1	1	1	1	1	1	1	1	0.955	0.955	0.955	1	1	1	1	1	1	0.955	0.909	1	1	1	1	1	1	0.955	1	1	1		3362.64	3367.35	3434.5	3878.97	3704.17	3213.84	3541.73	3312.99	3071.27	3315.85
Firmicutes	Bacilli	Lactobacillales	Leuconostocaceae	sf_1	3573	67688	AF360736.1	Leuconostoc ficulneum str. FS-1	0.925	0.953	0.78	0.718	0.692	0.763	0.698	0.8	0.775	0.841	0.8	0.773	0.732	0.744	0.744	0.841	0.775	0.75	1	0.886	0.978	0.85	0.675	0.636	0.978	0.8	0.698	0.932	0.933	0.909		2530.6	2381.57	2244.51	2836.44	2808.75	2321.61	2301.32	2424.48	2327.13	2006.01
Proteobacteria	Deltaproteobacteria	Desulfobacterales	Desulfobacteraceae	sf_5	10017	70417	AF354158.1	marine methane seep clone 1517	0.545	0.538	0.636	0.538	0.727	0.636	0.714	0.643	0.583	0.923	0.786	0.857	0.5	0.6	0.583	0.5	0.545	0.385	0.643	0.583	0.583	0.538	0.545	0.538	0.857	0.846	0.571	0.769	0.714	0.769		630.495	458.879	783.625	256.97	215.712	491.635	414.137	395.614	343.039	667.158
Proteobacteria	Betaproteobacteria	Rhodocyclales	Rhodocyclaceae	sf_1	7762	50273	AF150698.1	Elbe River snow isolate Iso18 Iso18_1411	1	1	1	1	1	1	1	1	1	1	1	1	1	0.96	0.96	1	1	1	1	1	1	1	1	1	1	1	1	1	1	1		3125.53	2888.35	3335.41	2690.86	2663.81	2383.52	2698.41	2728.22	2293.18	2887.09
Firmicutes	Desulfotomaculum	Unclassified	Unclassified	sf_1	2443	13655	Y11573.1	Desulfotomaculum thermoacetoxidans str. DSM 5813	1	1	1	1	1	1	1	1	1	1	1	1	1	1	1	1	1	1	1	1	1	1	1	1	1	1	1	1	1	1		3901.52	3249.51	3019.05	3599.53	3815.4	3571.64	3414.38	3188.69	3094.5	3157.22
Proteobacteria	Alphaproteobacteria	Rickettsiales	Anaplasmataceae	sf_3	6803	41221	AY007547.1	Wolbachia sp. Dlem16SWol	1	1	1	1	1	1	1	1	1	1	1	1	1	1	0.962	1	1	1	1	1	1	1	1	1	1	1	1	1	1	1		2847.46	1862.34	2273.6	2612.69	2676.17	2710.37	2018.54	2084	2003.74	2278.85
Termite group 1	Unclassified	Unclassified	Unclassified	sf_2	722	77986	AB089051.1	termite gut homogenate clone Rs-H93 group	0.765	0.944	0.882	0.941	0.941	0.941	1	1	0.889	0.947	0.895	0.947	0.944	0.944	0.833	0.941	1	0.889	0.947	1	0.944	1	1	0.944	1	1	0.944	0.895	0.947	0.895		2510.12	2556.88	2986.32	1855.46	1854.9	2090.36	2515.91	2521.77	2230.65	2664.1
Proteobacteria	Gammaproteobacteria	Enterobacteriales	Enterobacteriaceae	sf_1	8510	27939	AJ233420.1	Klebsiella pneumoniae str. DSM 30104	0.968	0.987	0.968	0.953	0.852	0.871	0.994	0.994	0.987	0.994	0.994	0.994	0.987	0.98	0.98	0.987	0.98	0.981	0.994	0.987	1	0.981	0.974	0.994	0.987	0.987	0.987	1	0.994	1		4278.74	3361.6	2292.69	1614.12	1624.58	1624.22	2443.71	2672.01	2095.75	2811.85
Firmicutes	Clostridia	Clostridiales	Clostridiaceae	sf_12	4154	79436	AY187622.1	Clostridium tunisiense str. DSM 15206	0.906	0.949	0.885	0.868	0.872	0.885	0.902	0.92	0.935	0.943	0.942	0.953	0.901	0.856	0.848	0.93	0.894	0.871	0.943	0.966	0.943	0.919	0.905	0.936	0.966	0.931	0.89	0.919	0.948	0.919		2568.32	2424.68	2093.61	2009.84	1976.23	2074.88	2150.91	2184.52	1918.87	2161.92
Bacteroidetes	Bacteroidetes	Bacteroidales	Unclassified	sf_15	5475	16567	AJ249101.1	SHA-25 clone	0.833	1	1	0.833	0.917	1	1	1	1	1	1	1	1	0.917	0.917	1	0.917	1	1	1	1	1	0.917	1	0.917	1	1	0.917	0.917	0.917		2073.63	2737.95	2695.42	2655.68	3173.88	2781.38	2573.07	2565	2888.14	2229
Firmicutes	Clostridia	Clostridiales	Peptostreptococcaceae	sf_5	3220	66192	AJ488072.1	chlorobenzene-degrading consortium clone IA-19	0.727	0.929	0.917	0.909	0.636	0.818	0.846	0.846	0.818	0.846	0.769	0.786	0.818	0.909	0.727	0.833	0.75	0.692	0.923	1	0.786	0.769	0.9	0.75	1	0.833	0.769	0.846	1	0.846		1160.76	1430.28	1332.71	373.241	284.245	467.964	525.443	542.618	529.745	852.983
Firmicutes	Bacilli	Bacillales	Paenibacillaceae	sf_1	3641	38999	AJ313027.1	Brevibacillus sp. MN 47.2a	0.842	0.85	0.8	0.85	0.895	0.85	0.85	0.9	0.9	0.9	0.95	0.95	0.9	0.8	0.9	0.85	0.85	0.9	0.95	0.95	0.9	0.9	0.9	0.9	1	0.95	0.85	1	1	1		3406.83	3413.33	3357.22	2647.86	2570.56	2497.32	3120.57	3228.68	2659.44	3097.39
Bacteroidetes	Bacteroidetes	Bacteroidales	Unclassified	sf_15	5410	66165	AJ488099.1	chlorobenzene-degrading consortium clone IIIB-28	0.857	0.861	0.833	0.833	0.833	0.833	0.919	0.838	0.838	0.892	0.892	0.865	0.833	0.833	0.861	0.861	0.861	0.861	0.838	0.861	0.811	0.861	0.886	0.838	0.944	0.861	0.838	0.861	0.944	0.861		3351.86	2458.21	2888.14	3130.54	3176.13	2911.57	2867.88	2531.5	2696.07	2630.56
Proteobacteria	Alphaproteobacteria	Acetobacterales	Unclassified	sf_1	7294	NA			0.455	0.5	0.583	0.667	0.727	0.75	0.455	0.583	0.667	0.833	0.667	0.5	0.5	0.636	0.167	0.417	0.636	0.333	0	0.636	0.333	0.583	0.5	0.455	0.583	0.75	0.583	0.909	0.75	0.667		86.2215	76.6395	370.904	122.134	189.871	269.489	58.1597	91.8775	196.533	120.56
Proteobacteria	Gammaproteobacteria	Enterobacteriales	Enterobacteriaceae	sf_1	9408	85221	AY136167.1	Chaitophorus populeti symbiont	0.667	0.792	0.696	0.591	0.591	0.609	0.8	0.833	0.8	0.818	0.87	0.76	0.583	0.636	0.625	0.609	0.652	0.609	0.727	0.609	0.625	0.667	0.565	0.625	0.833	0.792	0.652	0.783	0.913	0.87		1925.97	1251.14	1319.98	1157.83	1299.89	1180.83	1192.27	1196.57	1153.29	1183.84
Firmicutes	Clostridia	Clostridiales	Clostridiaceae	sf_12	4610	32184	AF127024.1	Clostridium putrefaciens str. DSM 1291	0.988	0.988	0.952	0.976	0.951	0.976	0.988	0.988	0.976	0.988	0.988	0.988	0.988	0.951	0.939	0.976	0.988	0.988	1	1	0.988	0.976	0.928	1	1	0.976	0.988	1	1	0.988		2658.85	2638.31	2382.69	2097.77	2021.17	2076.7	2249.18	2144.53	1900.11	2386.72
Actinobacteria	Actinobacteria	Actinomycetales	Corynebacteriaceae	sf_1	1803	60234	AJ429234.1	Corynebacterium spheniscorum str. CCUG 45512	1	0.923	0.923	0.923	0.923	0.923	0.923	0.923	0.923	0.923	0.923	1	0.923	0.923	1	0.923	0.923	0.923	1	0.923	1	0.923	0.923	0.923	0.923	0.923	0.846	0.923	1	0.923		1391.4	1222.4	1163.62	1806.61	1674.01	1879.14	1285.53	969.578	1421.29	1050.59
Proteobacteria	Deltaproteobacteria	Myxococcales	Myxococcaceae	sf_1	10232	NA			0.875	0.75	0.688	0.812	0.875	0.824	0.875	0.875	0.812	0.938	0.938	0.938	0.875	0.733	0.75	0.812	0.812	0.812	0.875	0.812	0.812	0.812	0.733	0.875	0.938	0.875	0.812	0.812	0.938	0.938		1083.16	859.32	999.986	1056.21	1107.77	1117.1	902.478	805.279	930.85	911.904
Chlorobi	Unclassified	Unclassified	Unclassified	sf_8	6053	66901	AJ306807.1	DCP-dechlorinating consortium clone SHA-83	0.667	0.786	0.769	0.769	0.833	0.846	0.8	0.8	0.857	0.857	0.8	0.867	0.857	0.714	0.867	0.8	0.857	0.8	0.929	0.929	0.867	0.867	0.643	0.929	0.857	0.929	0.786	0.867	0.929	0.923		3000.51	3173.83	3084.5	2482.74	2323.39	2270.63	2890.94	2828.75	2261.02	3052.07
Firmicutes	Bacilli	Lactobacillales	Leuconostocaceae	sf_1	3311	15100	M23035.1	Leuconostoc mesenteroides	0.182	0.273	0.25	0.222	0.2	0.222	0.182	0.182	0.222	0.2	0.2	0.273	0.3	0.25	0.273	0.182	0.2	0.273	1	0.2	1	0.2	0.25	0.273	0.273	0.222	0.2	0.2	0.2	0.2		120.71	367.869	272.723	66.4409	41.5694	110.163	68.1872	70.2593	144.719	94.2723
Actinobacteria	Actinobacteria	Unclassified	Unclassified	sf_1	1898	78335	AB089074.1	termite gut homogenate clone Rs-J10 bacterium	0.867	0.933	0.933	0.933	0.897	0.897	0.933	0.9	0.9	0.967	0.933	0.933	1	0.867	0.9	0.9	0.9	0.9	1	0.867	0.9	0.9	0.9	0.933	0.967	0.9	0.867	0.933	0.933	1		3089.96	3340.52	3160.86	3057.26	2906.49	2851.48	2947.09	2881.71	2670.16	3120.96
Proteobacteria	Betaproteobacteria	Rhodocyclales	Rhodocyclaceae	sf_1	7910	6715	AF011351.1	Azospira oryzae str. BS2-3	0.829	0.913	0.913	0.778	0.738	0.775	0.854	0.83	0.891	0.889	0.913	0.857	0.848	0.864	0.826	0.826	0.783	0.8	0.959	0.913	0.913	0.844	0.8	0.822	0.857	0.891	0.809	0.913	0.913	0.891		2713.82	2518.56	2698.14	2035.24	1922.31	2015.7	2656.29	2629.86	2199.38	2776.5
Proteobacteria	Deltaproteobacteria	Desulfovibrionales	Desulfovibrionaceae	sf_1	10071	10515	M34113.1	Desulfovibrio desulfuricans	0.944	0.972	0.972	0.972	0.972	0.972	0.972	0.972	1	0.972	1	0.944	0.972	0.972	0.944	0.917	0.972	0.917	0.972	1	1	0.944	0.972	0.972	0.972	0.972	0.944	1	0.972	0.972		3245.16	2888.35	2731.78	2559.93	2608.76	2866.05	2905.98	3009.26	2605.84	3008.56
Proteobacteria	Gammaproteobacteria	Enterobacteriales	Enterobacteriaceae	sf_1	8282	63942	AF476101.1	Antonina pretiosa symbiont	1	0.975	0.975	0.947	0.923	0.897	0.975	0.975	0.95	1	0.975	1	0.925	0.85	0.949	0.975	0.975	1	0.975	0.95	0.975	0.95	0.875	0.975	1	0.975	0.975	0.975	1	1		3693.51	2671.84	2633.6	2713.33	2985.13	2543.76	2701.42	2686.07	2441.47	2737.52
Cyanobacteria	Cyanobacteria	Chloroplasts	Chloroplasts	sf_5	4966	34845	AF244549.1	Adiantum pedatum	1	1	1	1	1	1	0.958	1	1	1	1	1	1	0.958	0.958	0.958	0.958	0.958	1	1	1	0.958	0.958	0.958	1	1	0.958	1	1	1		2271.94	2287.69	2149.97	2953.69	2855.93	3076.36	2732.5	2427.73	2559.39	3286.84
Proteobacteria	Alphaproteobacteria	Unclassified	Unclassified	sf_6	7534	29952	AF234689.1	sludge clone H6	0.667	0.727	0.5	0.5	0.5	0.636	0.727	0.818	0.727	0.75	0.909	0.75	0.545	0.455	0.545	0.636	0.545	0.5	0.643	0.583	0.636	0.727	0.5	0.636	0.923	0.909	0.833	0.917	0.833	0.833		428.952	536.476	273.632	137.767	125.832	307.727	229.631	274.552	275.146	304.572
Chloroflexi	Anaerolineae	Chloroflexi-1f	Unclassified	sf_1	765	65481	AJ278167.1	anaerobic bioreactor clone SHD-71	0.929	0.931	0.867	0.933	0.931	0.933	0.867	0.871	0.931	0.967	0.935	0.903	0.9	0.897	0.867	0.929	0.897	0.933	0.966	0.963	0.897	0.867	0.929	0.9	0.967	0.9	0.966	0.967	0.967	0.967		2650.23	2158.36	1904.52	1958.05	2264.97	2334.36	1973.42	1913.21	2040.37	1970.65
Proteobacteria	Alphaproteobacteria	Rhodobacterales	Rhodobacteraceae	sf_1	7536	NA			0.667	0.818	0.727	1	1	1	0.909	1	0.909	0.909	1	0.909	0.917	1	0.909	0.818	0.909	0.833	0.833	0.909	0.75	0.909	0.909	0.909	0.909	0.909	0.909	1	0.909	0.833		2105.96	1289.46	900.896	1931.67	1753.78	1768.07	1614.43	1860.25	1853.66	1447.62
Proteobacteria	Gammaproteobacteria	Vibrionales	Vibrionaceae	sf_1	9174	NA			0.857	0.9	1	0.667	0.875	0.875	1	1	0.778	0.889	1	0.9	0.889	0.875	0.818	1	0.75	1	0.9	1	1	0.778	0.75	0.818	0.818	0.778	0.9	0.875	0.875	1		1519.65	975.237	1127.26	570.61	715.668	916.808	672.848	608.553	653.024	597.36
Proteobacteria	Deltaproteobacteria	Desulfobacterales	Desulfobacteraceae	sf_5	10226	10938	AF099056.1	Desulfobacterium sp. str. LSv25	0.7	0.636	0.6	0.727	0.636	0.727	0.818	0.818	0.727	0.909	0.818	0.909	0.727	0.7	0.727	0.7	0.636	0.636	0.727	0.636	0.545	0.8	0.778	0.727	0.909	0.727	0.583	0.833	0.909	0.833		775.993	591.082	678.172	709.354	780.831	650.961	802.203	779.337	705.731	757.805
Planctomycetes	Planctomycetacia	Planctomycetales	Pirellulae	sf_3	4740	NA			0.667	0.6	0.667	0.7	0.6	0.7	0.583	0.636	0.6	0.583	0.667	0.583	0.6	0.6	0.6	0.545	0.583	0.5	0.545	0.6	0.6	0.583	0.583	0.583	1	0.667	0.667	1	1	1		1436.67	1476.27	1610.89	1342.5	1365.05	1670.65	957.63	1222.51	1438.26	1405.93
Cyanobacteria	Cyanobacteria	Oscillatoriales	Unclassified	sf_1	5184	80667	AB074508.1	Arthrospira platensis str. IAM M-135	0.95	0.955	0.909	0.92	0.92	0.88	0.852	0.885	0.917	0.885	0.92	0.88	0.92	0.917	0.88	0.92	0.958	0.923	0.88	0.833	0.88	0.885	0.92	0.923	0.88	0.84	0.833	0.917	0.917	0.917		1864.54	2163.15	1965.43	2384.05	2435.74	2638.44	2171.96	2080.75	2151.14	2509.09
Actinobacteria	Actinobacteria	Actinomycetales	Micrococcaceae	sf_1	1966	59890	AY133106.1	TCE-contaminated site clone ccspost2208	0.826	0.939	0.917	0.804	0.822	0.844	0.796	0.854	0.848	0.939	0.98	0.878	0.796	0.844	0.809	0.83	0.854	0.83	0.98	0.959	1	0.826	0.822	0.796	0.98	0.959	0.837	1	0.98	0.98		2098.42	2140.16	2286.33	2430.95	2359.35	2440.88	2069.68	2315.31	2418.24	2086.68
Proteobacteria	Gammaproteobacteria	Oceanospirillales	Halomonadaceae	sf_1	8562	61014	AB085649.1	Halomonas sp. str. TNB I20	1	0.846	0.833	0.909	0.909	0.917	0.846	1	1	0.929	0.923	1	0.846	0.833	0.923	0.923	0.692	1	1	0.846	0.857	0.769	0.75	0.692	1	1	0.857	0.857	0.857	0.786		2247.15	1861.38	1522.71	2494.46	2535.74	2453.62	1978.43	1860.25	2126.13	1849.19
Actinobacteria	Actinobacteria	Actinomycetales	Micromonosporaceae	sf_1	1770	12903	X93194.1	Dactylosporangium roseum str. DSM 43916	0.882	0.771	0.794	0.806	0.778	0.833	0.833	0.833	0.833	0.806	0.833	0.833	0.861	0.806	0.8	0.812	0.848	0.788	0.824	0.771	0.818	0.794	0.848	0.848	0.917	0.806	0.73	0.811	0.892	0.889		1486.24	1184.08	1328.16	1580.9	1547.06	1781.72	1009.77	1099.29	1495.43	1107.7
Actinobacteria	Actinobacteria	Actinomycetales	Gordoniaceae	sf_1	1116	13283	X79286.1	Gordona terrae	0.444	0.846	0.583	0.769	0.615	0.692	0.615	0.692	0.667	0.846	0.846	0.923	0.769	0.615	0.462	0.364	0.727	0.364	0.833	0.583	0.833	0.417	0.364	0.364	1	0.917	0.538	0.846	1	0.923		591.695	610.242	640.9	867.64	779.708	701.946	543.492	585.854	678.931	551.131
Firmicutes	Bacilli	Bacillales	Bacillaceae	sf_1	3467	70144	AJ419629.1	Bacillus luciferensis str. LMG 18422	0.846	0.769	0.769	0.571	0.667	0.615	0.786	0.786	0.714	0.857	0.857	0.786	0.786	0.571	0.714	0.769	0.643	0.643	0.786	0.714	0.714	0.643	0.692	0.643	1	0.786	0.643	0.857	0.929	0.929		2519.82	2188.06	2096.33	1621.94	1896.46	1911.91	1874.15	1970.5	1688.39	2175.52
Proteobacteria	Gammaproteobacteria	Oceanospirillales	Alcanivoraceae	sf_1	8434	8230	AF062642.1	Alcanivorax borkumensis str. LE4	0.727	0.625	0.444	1	0.727	0.909	0.556	0.625	0.636	0.625	0.875	0.5	1	0.923	0.455	0.286	0.333	0.286	0.556	0.375	0.5	0.333	0.25	0.333	0.7	0.625	0.333	0.667	0.8	0.7		250.042	128.371	119.998	310.709	215.712	376.01	96.2643	127.548	143.826	145.941
Chloroflexi	Anaerolineae	Chloroflexi-1a	Unclassified	sf_1	258	66911	AJ306793.1	DCP-dechlorinating consortium clone SHD-14	0.8	0.7	0.8	0.9	1	0.9	0.9	0.909	0.9	0.909	1	0.909	1	0.8	1	0.9	0.9	1	1	1	1	1	0.9	1	1	0.909	0.9	1	1	1		4206.53	3960.34	3887.22	3201.86	3128.94	2842.38	4029.06	3782.11	2976.58	3624.95
Proteobacteria	Gammaproteobacteria	Enterobacteriales	Enterobacteriaceae	sf_1	9029	91820	AY280573.1	Photorhabdus asymbiotica subsp. australis str. MB	0.959	0.959	0.859	0.794	0.742	0.758	0.861	0.875	0.829	0.917	0.915	0.917	0.75	0.773	0.758	0.875	0.851	0.817	0.973	0.859	0.987	0.903	0.795	0.867	0.973	0.96	1	0.987	0.973	0.973		3612.68	2614.36	2009.97	2203.3	2170.6	1898.26	2201.04	2154.26	1873.31	2227.18
Proteobacteria	Deltaproteobacteria	Desulfovibrionales	Desulfomicrobiaceae	sf_1	10370	10418	AF030438.1	Desulfomicrobium baculatum str. X; VKM B-1378; DSM 4	0.923	0.938	0.867	0.867	0.867	1	1	1	0.933	1	1	1	0.933	0.857	0.8	0.8	1	0.933	1	0.938	1	0.8	0.867	1	0.938	0.933	0.938	1	0.938	0.938		3543.7	2596.16	2640.87	3549.7	3787.31	3486.06	2909.99	2788.75	2784.51	2680.42
Firmicutes	Clostridia	Clostridiales	Clostridiaceae	sf_12	4296	71518	AB081585.1	Clostridiaceae str. A4d	0.986	0.993	0.971	0.911	0.865	0.919	0.993	0.993	0.979	0.993	0.993	0.993	0.957	0.904	0.914	0.979	0.979	0.957	1	1	0.993	0.993	0.928	0.993	1	0.993	0.993	1	0.993	0.993		3113.67	3011.93	2739.05	2329.34	2200.93	2136.79	2669.33	2639.59	2271.74	2669.54
Firmicutes	Bacilli	Bacillales	Bacillaceae	sf_1	3517	66683	AF500007.1	Planococcus maritimus str. TF-9	0.915	0.84	0.932	0.628	0.667	0.643	0.896	0.917	0.918	0.958	0.979	0.917	0.83	0.705	0.98	0.875	0.809	0.771	0.96	0.896	0.958	0.872	0.818	0.851	0.941	0.936	0.875	0.936	0.957	0.918		2094.1	1995.5	1929.06	1597.51	1554.92	1619.66	1524.19	1623.53	1628.54	1917.17
Proteobacteria	Gammaproteobacteria	Unclassified	Unclassified	sf_3	8397	77715	AJ535226.1	marine sediment above hydrate ridge clone Hyd24-13 proteobacterium	0.63	0.76	0.679	0.931	0.857	0.966	0.778	0.759	0.821	0.786	0.893	0.786	0.75	0.63	0.815	0.821	0.769	0.731	0.7	0.778	0.846	0.704	0.654	0.741	0.862	0.821	0.75	0.929	0.931	0.931		1989.56	2067.35	1619.98	1707.92	1805.46	2084.9	1599.39	1644.07	1564.22	1641.61
Proteobacteria	Alphaproteobacteria	Consistiales	Unclassified	sf_4	7105	102345	AB186982.1	Mariana trough hydrothermal vent water 0.2micro-m filterable fraction clone MT-NB25	1	1	1	1	1	1	1	1	1	1	1	1	1	1	1	1	1	1	1	1	1	1	0.923	1	1	1	1	1	1	1		3468.26	2154.53	2379.06	3671.84	3860.34	3398.66	2674.34	2883.87	2590.66	2878.93
Firmicutes	Clostridia	Clostridiales	Peptostreptococcaceae	sf_5	3112	110205	CR933145.1	Evry municipal wastewater treatment plant clone 012C11_B_SD_P15	0.947	1	0.947	0.789	0.778	0.833	0.895	0.895	0.895	0.947	0.947	0.947	0.944	0.889	0.895	0.944	0.895	0.944	0.947	0.947	0.947	0.895	0.895	0.944	1	0.947	0.947	1	1	0.947		2795.73	3033.01	2647.23	2108.52	2139.14	1907.36	2401.59	1857.01	1672.31	2127.47
Proteobacteria	Gammaproteobacteria	Enterobacteriales	Enterobacteriaceae	sf_1	8934	66737	AF373188.1	Pectobacterium subsp. carotovorum str. E155 subsp.	0.964	0.982	0.955	0.944	0.873	0.881	0.991	0.982	0.973	0.982	0.982	0.991	0.982	0.991	0.973	0.991	0.982	0.982	0.991	0.982	1	0.982	0.982	1	0.982	0.991	0.982	1	0.991	1		4116	3264.84	2279.97	1280.94	1215.62	1402.07	2327.39	2630.94	2073.42	2665.01
Proteobacteria	Gammaproteobacteria	Enterobacteriales	Enterobacteriaceae	sf_1	9363	9841	AF025365.1	Citrobacter freundii str. CDC 621-64	0.972	0.972	0.978	0.949	0.857	0.873	0.989	0.983	0.978	0.983	0.989	0.989	0.983	0.972	0.978	0.989	0.972	0.956	0.989	0.983	1	0.983	0.95	0.989	0.978	0.989	0.983	1	0.994	1		4449.03	3421.95	2209.97	1562.34	1398.76	1529.53	2557.02	2752	2166.33	2661.38
Firmicutes	Bacilli	Bacillales	Bacillaceae	sf_1	3383	NA			0.857	0.867	0.867	0.769	0.714	0.846	0.875	0.875	0.933	0.867	0.933	0.933	0.8	0.733	0.875	0.875	0.8	0.625	0.875	0.867	0.812	0.733	0.786	0.8	0.933	0.929	0.625	0.812	0.929	0.867		1137.05	1726.3	1554.52	1311.23	985.308	1249.12	1224.36	1203.05	1386.45	1380.55
Proteobacteria	Gammaproteobacteria	Enterobacteriales	Enterobacteriaceae	sf_1	9252	9821	AF130971.2	Pantoea cedenensis str. A34	0.833	0.75	0.778	0.8	0.8	0.7	0.818	0.818	0.818	0.917	0.917	0.917	0.8	0.889	0.8	0.7	0.8	0.636	0.833	0.7	0.833	0.8	0.7	0.667	0.917	0.917	0.917	0.75	0.833	0.833		2330.14	2042.44	2618.14	1751.89	1896.46	1756.23	2075.7	1946.72	1884.93	2304.23
Firmicutes	Bacilli	Lactobacillales	Lactobacillaceae	sf_1	3418	15208	AB001836.2	Lactobacillus subsp. aviarius	0.87	0.957	0.87	0.905	0.81	0.762	0.826	0.826	0.864	0.87	0.913	0.87	0.826	0.773	0.826	0.826	0.857	0.818	0.87	0.864	0.913	0.818	0.773	0.826	0.957	0.87	0.864	0.87	0.957	0.87		2655.62	3150.84	2929.96	2607.8	2316.65	2162.28	3316.11	3126	2757.71	2965.05
Termite group 1	Unclassified	Unclassified	Unclassified	sf_2	437	78103	AB089050.2	termite gut homogenate clone Rs-D43 group	0.857	0.933	0.857	0.857	0.857	0.857	1	1	0.867	0.938	0.875	0.938	0.933	0.867	0.857	0.929	1	0.933	0.938	1	0.933	1	1	0.933	1	1	0.933	0.875	0.938	0.875		2739.69	2759.98	3185.41	2268.76	2159.36	2338.91	2963.14	2825.5	2611.2	2749.31
Firmicutes	Clostridia	Clostridiales	Clostridiaceae	sf_12	206	78366	AB089017.1	termite gut homogenate clone Rs-P50 bacterium	0.971	0.944	0.943	0.941	0.914	0.889	0.914	0.914	0.914	0.943	0.944	0.912	0.941	0.912	0.824	0.886	0.914	0.886	0.865	0.971	0.943	0.914	0.914	0.914	0.919	0.971	0.943	0.972	0.946	0.944		3140.62	2567.42	2465.42	2584.35	2575.06	2411.74	2779.63	2427.73	2257.45	2241.69
Actinobacteria	Actinobacteria	Actinomycetales	Actinomycetaceae	sf_1	1227	49418	AB062278.1	Actinomyces naeslundii	0.75	0.917	0.9	1	0.818	1	0.909	0.909	0.833	0.9	0.818	1	0.909	0.909	1	1	1	0.818	1	0.818	0.909	1	0.8	1	0.917	0.909	0.818	0.75	1	0.917		888.081	1370.89	1265.44	1449.97	1054.96	1535.9	910.5	957.688	1391.81	1156.65
Actinobacteria	Actinobacteria	Actinomycetales	Mycobacteriaceae	sf_1	1726	13085	X52925.1	Mycobacterium terrae str. ATCC 15755	0.875	1	1	1	0.944	0.944	0.944	1	0.944	0.944	0.944	1	0.944	0.889	0.944	1	1	0.889	1	0.944	1	1	0.941	1	0.944	0.944	0.889	0.944	1	1		1104.71	980.985	891.805	1356.18	1107.77	1555.93	713.961	804.198	1366.8	781.373
Aquificae	Aquificae	Aquificales	Hydrogenothermaceae	sf_1	737	71370	AF528192.1	Sulfurihydrogenibium azorense	0.75	0.938	1	0.875	0.933	0.875	0.938	0.875	0.875	0.938	1	1	1	0.938	0.933	0.933	0.933	0.812	0.938	0.933	0.812	0.875	0.867	1	1	1	0.938	1	1	1		1257.76	1438.91	1393.62	1138.29	1247.08	1484.92	1153.17	978.225	1259.6	1268.14
Bacteroidetes	Sphingobacteria	Sphingobacteriales	Unclassified	sf_6	5439	56341	AF507859.1	Mono Lake at depth 35 m station 6 July 2000 clone ML635J-40 bacterium	1	1	1	1	1	1	1	1	1	1	1	1	1	1	1	1	1	1	1	1	1	1	1	1	1	1	1	1	1	1		3540.47	3504.34	3936.31	3910.24	3941.23	3713.67	3983.94	3599.44	3402.69	3786.3
Actinobacteria	Actinobacteria	Actinomycetales	Streptomycetaceae	sf_1	1111	20942	AB022868.1	Kitasatospora setae str. KM-6054	0.824	1	0.833	0.944	0.765	0.941	0.889	1	1	1	0.944	0.889	1	0.889	0.889	0.944	0.944	0.833	0.824	1	0.941	0.833	1	0.941	0.95	1	0.889	1	1	1		1075.61	999.187	1198.16	808.038	797.684	879.481	808.219	840.949	1176.52	989.86
Firmicutes	Catabacter	Unclassified	Unclassified	sf_4	4325	78194	AB088963.1	termite gut homogenate clone Rs-K21 bacterium	0.962	0.963	0.962	0.88	0.846	0.885	0.926	0.963	0.889	0.963	0.963	0.963	0.815	0.8	0.885	0.852	0.926	0.923	1	0.926	0.926	0.926	0.923	1	1	0.963	0.926	1	1	0.963		2381.87	2326.01	2153.61	2323.48	2117.79	1946.51	2137.87	1812.69	1626.75	1924.42
Actinobacteria	Actinobacteria	Actinomycetales	Micrococcaceae	sf_1	1557	12407	X83408.1	Arthrobacter oxydans str. DSM 20119	0.786	0.933	0.862	0.704	0.731	0.769	0.7	0.793	0.741	0.933	0.967	0.833	0.7	0.769	0.714	0.75	0.759	0.75	1	0.933	1	0.741	0.692	0.667	1	0.967	0.767	1	1	1		1852.68	2094.17	2010.88	2209.16	2206.55	2182.31	1790.92	1928.35	2252.98	1722.28
Bacteroidetes	Flavobacteria	Flavobacteriales	Flavobacteriaceae	sf_1	6211	NA			0.667	0.583	0.538	0.923	0.846	0.846	0.909	0.692	0.846	0.727	0.667	0.692	0.846	0.917	0.769	0.538	0.615	0.583	0.538	0.538	0.538	0.615	0.667	0.667	0.692	0.615	0.538	0.769	0.615	0.692		1328.89	1174.5	922.714	2236.52	2148.13	2338.91	1598.39	1414.91	2119.87	1378.73
Firmicutes	Bacilli	Lactobacillales	Enterococcaceae	sf_1	3680	15284	X75752.1	Melissococcus plutonius str. NCDO 2440	0.922	0.908	0.906	0.677	0.6	0.712	0.864	0.877	0.919	0.909	0.923	0.892	0.864	0.689	0.833	0.894	0.831	0.769	0.926	0.892	0.925	0.703	0.651	0.815	0.969	0.921	0.769	0.938	0.954	0.954		2054.23	2342.29	2131.79	2144.67	2099.82	1906.45	2100.77	2136.96	2030.54	2084.87
Firmicutes	Clostridia	Clostridiales	Peptococc/Acidaminococc	sf_11	71	81047	AY218598.1	penguin droppings sediments clone KD2-97	0.907	0.932	0.907	0.881	0.878	0.905	0.884	0.907	0.951	0.93	0.93	0.907	0.951	0.902	0.949	0.902	0.927	0.884	1	0.905	0.907	0.881	0.927	0.907	0.932	0.93	0.86	0.977	0.977	0.953		2755.85	2465.88	2287.24	1602.4	1649.3	1691.59	2197.03	2168.31	2107.37	2359.53
Cyanobacteria	Cyanobacteria	Pseudanabaena	Unclassified	sf_1	5082	58469	AB045929.1	Limnothrix redekei str. NIVA CYA 227/1	0.895	0.75	0.895	0.842	0.842	0.842	0.65	0.8	0.895	0.85	0.85	0.7	0.8	0.842	0.7	0.762	0.8	0.762	0.65	0.8	0.762	0.81	0.81	0.857	0.7	0.895	0.762	0.85	0.95	1		2213.74	1780.91	2398.15	2168.12	1911.07	2240.58	1949.35	1846.2	2295.86	2280.67
Verrucomicrobia	Unclassified	Unclassified	Unclassified	sf_4	288	1588	U60012.1	Prosthecobacter dejongeii	1	1	1	0.909	1	1	1	1	1	1	1	1	1	0.917	1	1	0.833	0.909	1	1	1	0.909	0.833	0.909	1	1	1	0.917	0.917	1		3959.72	3262.93	2479.96	3494.99	3894.04	3687.26	3443.46	3243.82	2902.43	3242.42
Acidobacteria	Acidobacteria-4	Unclassified	Unclassified	sf_1	6363	3686	Z95711.1	soil clone 32-11	0.867	0.938	0.8	0.8	0.733	0.867	0.875	0.875	0.867	0.938	0.938	0.875	0.8	0.8	0.8	0.786	0.8	0.812	0.812	0.867	0.812	0.8	0.857	0.812	1	0.875	0.812	0.875	0.938	0.938		2261.16	2437.14	2020.88	2519.87	2525.62	2307.95	1802.95	1758.64	2058.23	2012.35
Proteobacteria	Gammaproteobacteria	Enterobacteriales	Enterobacteriaceae	sf_1	8773	NA			0.958	0.958	0.773	0.773	0.773	0.81	0.913	0.913	0.81	0.957	0.913	0.913	0.864	0.762	0.773	0.957	0.727	0.682	1	0.917	0.958	0.708	0.682	0.75	0.917	1	0.913	0.957	0.957	0.958		1310.57	1652.54	628.173	641.936	362.89	671.901	789.167	818.25	745.931	852.077
Proteobacteria	Gammaproteobacteria	Enterobacteriales	Enterobacteriaceae	sf_1	9345	69975	AF141891.1	Erwinia amylovora str. BC199(=Ea528)	0.98	0.971	0.941	0.86	0.817	0.802	0.96	0.971	0.98	0.961	0.971	0.971	0.98	0.97	0.971	0.99	0.951	0.96	0.99	0.98	1	0.99	0.97	0.971	0.99	0.99	1	1	1	0.99		4374.66	3060.79	2009.97	1960.98	1982.97	1775.35	2451.73	2490.42	2131.49	2575.27
Actinobacteria	Actinobacteria	Actinomycetales	Cellulomonadaceae	sf_1	1431	39459	AB078838.1	Cellulomonadaceae str. W6	0.891	0.959	0.896	0.936	0.913	0.935	0.918	0.959	0.979	0.98	0.959	0.939	0.979	0.938	0.979	0.979	0.979	0.979	0.938	0.957	0.936	0.958	0.913	0.957	1	1	0.918	1	1	1		2066.08	2114.29	2029.06	2027.42	1813.33	1920.11	2140.88	2233.16	2500.43	2005.1
Proteobacteria	Alphaproteobacteria	Azospirillales	Magnetospirillaceae	sf_1	7561	4524	Y10110.1	Magnetospirillum magnetotacticum str. DSM 3856 (T)	0.455	0.385	0.455	0.417	0.556	0.667	0.429	0.4	0.455	0.625	0.812	0.938	0.364	0.273	0.455	0.417	0.333	0.333	0.6	0.385	0.5	0.455	0.231	0.417	0.882	0.769	0.5	0.8	0.933	0.929		766.293	517.316	339.995	126.042	106.732	253.101	192.529	274.552	318.026	321.795
Spirochaetes	Spirochaetes	Spirochaetales	Spirochaetaceae	sf_1	6503	108475	AY570600.1	biodegraded Canadian oil reservoir clone PL-16B9	0.727	0.9	0.682	0.636	0.682	0.762	0.682	0.727	0.818	0.864	0.87	0.87	0.609	0.65	0.619	0.857	0.682	0.667	0.75	0.773	0.652	0.696	0.609	0.652	0.826	0.909	0.682	0.826	0.826	0.87		1264.22	1192.7	1095.44	1616.08	1414.48	1734.38	1371.77	1200.89	1309.62	1423.15
Actinobacteria	Actinobacteria	Actinomycetales	Pseudonocardiaceae	sf_1	1402	NA			0.917	0.946	0.912	0.865	0.886	0.914	0.892	0.944	0.889	0.895	0.919	0.946	0.892	0.861	0.846	0.886	0.914	0.811	0.872	0.861	0.947	0.889	0.824	0.846	0.897	0.917	0.816	0.816	0.947	0.921		1447.44	1467.65	1179.07	1233.06	1165.07	1478.55	1129.1	1151.17	1087.18	1183.84
Bacteroidetes	Bacteroidetes	Bacteroidales	Unclassified	sf_15	5257	80463	AY188307.1	marine? clone KD3-67	0.923	0.857	0.846	0.929	0.929	0.929	1	1	0.929	1	1	1	0.929	0.929	0.857	0.929	0.929	0.929	0.857	0.929	0.929	0.929	0.857	0.929	1	1	0.929	1	1	0.929		3068.41	2271.4	2733.6	1884.77	2139.14	2417.21	2149.9	2179.12	2245.83	2222.65
Bacteroidetes	Unclassified	Unclassified	Unclassified	sf_4	5703	NA			1	1	1	1	1	0.929	1	1	1	1	1	1	1	1	1	1	0.929	0.786	1	1	1	0.929	0.929	0.929	1	1	1	1	1	1		2401.27	2843.32	3119.05	3753.91	3451.39	3217.48	3071.43	2941.16	3132.91	2874.4
Firmicutes	Clostridia	Clostridiales	Peptostreptococcaceae	sf_5	58	68341	AF481225.1	Peptostreptococcus sp. str. E3_32	0.964	1	0.929	0.964	0.929	0.929	0.929	0.964	0.964	0.964	0.931	0.966	0.964	0.929	0.931	0.929	0.929	1	0.966	0.893	0.897	0.929	0.929	1	1	0.897	0.929	0.964	0.964	0.897		3372.34	3202.57	3077.23	3399.23	3560.37	3118.24	3095.5	2877.39	2605.84	2904.31
Gemmatimonadetes	Unclassified	Unclassified	Unclassified	sf_5	1127	75312	AJ519396.1	uranium mining waste pile near Johanngeorgenstadt soil clone JG37-AG-21	1	0.947	0.882	1	0.944	0.944	0.85	0.9	0.85	0.95	1	1	0.947	0.895	0.95	0.944	0.944	0.9	1	1	1	0.944	0.941	0.9	1	0.85	1	0.9	0.9	0.9		2613.59	2642.15	3091.77	2459.29	2309.91	2654.83	2683.37	2815.77	2562.96	2974.11
Proteobacteria	Alphaproteobacteria	Unclassified	Unclassified	sf_6	7421	NA			0.833	0.8	0.714	1	1	1	0.714	0.667	0.857	0.733	0.667	0.8	0.786	0.786	0.846	0.692	0.714	0.714	0.769	0.643	0.667	0.714	0.643	0.533	0.929	0.714	0.667	0.733	0.857	0.857		1037.89	838.244	1015.44	2406.53	2194.19	2212.36	771.118	666.923	954.077	857.516
Firmicutes	Unclassified	Unclassified	Unclassified	sf_8	141	19343	AF407393.1	MCB-contaminated groundwater-treating reactor clone RB9C2	1	1	0.895	0.9	0.947	0.895	0.9	0.895	0.895	1	0.95	0.95	0.9	0.895	0.882	0.895	0.947	0.889	0.95	0.95	0.95	0.9	0.947	0.9	0.952	1	1	0.95	0.905	1		2959.55	2258.95	2380.87	1967.82	2181.83	2134.06	1937.32	2195.33	1916.19	2337.77
Proteobacteria	Gammaproteobacteria	Enterobacteriales	Enterobacteriaceae	sf_1	8890	10131	X93216.1	Raoultella planticola str. DR3	0.984	0.976	0.992	0.944	0.842	0.876	1	0.992	1	0.992	1	1	1	0.992	0.984	1	0.992	0.969	0.992	0.992	1	0.992	0.944	0.992	0.992	0.992	0.992	1	1	1		4178.51	3170	2059.97	1143.17	1078.56	1270.97	2282.27	2485.02	1905.47	2487.34
Actinobacteria	Actinobacteria	Actinomycetales	Streptomycetaceae	sf_1	1983	27863	AJ399487.1	Streptomyces cinnabarinus str. ISP 5467	0.824	0.943	0.857	0.941	0.875	0.939	0.886	0.971	0.943	0.971	0.943	0.886	0.971	0.941	0.886	0.943	0.943	0.882	0.882	0.97	0.971	0.857	0.941	0.912	0.946	0.971	0.914	0.971	0.971	0.971		1615.57	1527.04	1386.34	1302.44	1008.9	1162.63	1782.9	1891.6	2005.53	1571.81
Proteobacteria	Betaproteobacteria	Neisseriales	Unclassified	sf_1	7683	110507	AJ487013.2	Microvirgula aerodenitrificans str. LMG 4329	0.417	0.714	0.714	0.462	0.429	0.429	0.571	0.643	0.714	0.857	0.786	0.714	0.643	0.643	0.462	0.714	0.615	0.429	0.714	0.667	0.714	0.467	0.643	0.4	0.75	0.929	0.571	0.533	0.733	0.643		619.717	723.285	747.262	209.093	189.871	323.205	390.071	579.369	649.451	559.289
Firmicutes	Clostridia	Clostridiales	Peptostreptococcaceae	sf_5	2796	73998	AF287764.1	human subgingival plaque clone BB142	1	0.97	0.939	0.97	0.909	0.939	0.909	0.939	0.939	0.912	0.912	0.912	0.939	0.906	0.909	0.939	0.909	0.909	0.941	1	1	0.939	0.969	0.909	0.971	0.97	0.882	0.941	0.941	0.941		2711.67	2697.71	2463.6	2764.14	2823.35	2493.68	2568.05	2282.89	2248.51	2170.08
Proteobacteria	Deltaproteobacteria	Myxococcales	Unclassified	sf_1	10259	NA			0.909	0.917	0.917	0.833	0.909	0.909	0.917	0.917	0.917	1	1	1	0.917	0.833	0.833	0.917	0.917	0.917	0.917	0.917	0.833	1	0.917	0.917	1	1	0.917	1	1	1		2657.78	2360.5	2372.69	2122.2	2327.89	2178.67	2408.61	2202.9	1484.71	2267.98
Firmicutes	Clostridia	Clostridiales	Clostridiaceae	sf_12	4339	16235	U51843.1	Clostridium chauvoei str. ATCC 10092T	0.981	0.988	0.975	0.943	0.917	0.968	0.981	0.988	0.981	0.994	0.994	0.988	0.988	0.918	0.911	0.975	0.969	0.981	1	0.994	0.994	0.994	0.944	0.988	0.994	0.994	0.988	1	0.994	0.994		2821.6	2923.8	2659.05	2073.35	1939.16	2064.87	2408.61	2393.14	2032.33	2554.42
Actinobacteria	Actinobacteria	Actinomycetales	Unclassified	sf_3	1687	99714	AJ626896.1	Jonesia quinghaiensis str. DSM 15701	1	1	1	1	1	1	1	1	1	1	1	1	1	1	1	1	1	1	1	1	1	1	1	1	1	1	1	1	1	1		2676.1	3089.53	2817.23	3611.26	3747.99	3263.91	2428.67	2560.68	2841.68	2041.36
Bacteroidetes	Flavobacteria	Flavobacteriales	Unclassified	sf_3	5248	86113	AY274839.1	Delaware River estuary clone 1G12	1	1	1	1	1	1	1	1	1	1	1	1	1	1	1	0.909	1	1	1	1	1	1	1	1	1	1	1	1	1	1		4801.46	4147.15	4792.66	5992.38	5791.63	4499.37	5147.13	4861.94	4428.24	4478.84
Actinobacteria	Actinobacteria	Actinomycetales	Micromonosporaceae	sf_1	1159	43093	AJ277568.1	Actinoplanes durhamensis str. IMSNU 22124T	0.846	1	0.833	0.909	0.818	0.909	0.833	1	0.846	0.917	0.846	0.923	0.917	0.917	0.923	0.909	1	0.833	0.917	0.833	0.846	1	0.909	0.846	1	0.917	0.833	0.917	1	0.923		1629.59	1339.27	1365.43	1942.42	1857.14	2083.99	1028.83	1167.38	1616.03	1037.9
Firmicutes	Clostridia	Clostridiales	Clostridiaceae	sf_12	4306	86415	AY261814.1	UASB reactor granular sludge clone PD-UASB-4 bacterium	0.945	0.956	0.967	0.944	0.886	0.966	0.956	0.956	0.978	0.956	0.967	0.945	0.956	0.9	0.923	0.956	0.967	0.945	0.956	0.978	0.956	0.967	0.956	0.956	0.956	0.967	0.956	0.967	0.956	0.956		3071.64	3111.56	2989.05	2135.88	1879.61	2036.64	2465.77	2493.66	2042.15	2696.73
Firmicutes	Bacilli	Bacillales	Bacillaceae	sf_1	3385	77320	AY167806.1	Bacillus licheniformis str. SAFN-031	0.545	0.846	0.583	0.583	0.5	0.583	0.667	0.615	0.583	0.846	0.769	1	1	0.5	1	0.5	0.667	0.5	0.923	0.583	0.667	0.5	0.583	0.583	0.923	0.583	0.538	0.846	1	0.769		1688.86	1462.86	1408.16	1635.62	1533.57	1424.83	1267.48	1280.88	1297.12	1162.09
Actinobacteria	Actinobacteria	Actinomycetales	Micrococcaceae	sf_1	1593	12395	M23411.1	Arthrobacter globiformis	0.767	0.939	0.875	0.733	0.759	0.793	0.727	0.812	0.767	0.939	0.97	0.848	0.727	0.793	0.742	0.774	0.781	0.774	1	0.939	1	0.767	0.724	0.697	1	0.97	0.788	1	1	1		1747.06	1947.6	1838.16	2414.34	2530.12	2382.61	1653.54	1782.42	2163.65	1570.9
Proteobacteria	Alphaproteobacteria	Rickettsiales	Anaplasmataceae	sf_3	6699	6047	U52514.1	Ehrlichia-like sp.	0.731	0.92	0.76	0.778	0.643	0.724	0.885	0.821	0.815	0.852	0.815	0.793	0.808	0.769	0.643	0.852	0.846	0.815	0.679	0.846	0.815	0.846	0.778	0.846	0.852	0.852	0.84	0.778	0.889	0.852		2019.74	1808.69	1967.24	1609.24	1534.7	1661.54	1604.41	1568.4	1591.02	1811.12
Verrucomicrobia	Verrucomicrobiae	Verrucomicrobiales	Verrucomicrobia subdivision 5	sf_1	21	63770	AY114336.1	anoxic marine sediment clone LD1-PB9	0.7	0.909	0.6	1	0.909	1	1	1	0.909	1	1	1	1	0.909	0.727	0.727	0.909	0.818	0.909	1	0.818	0.818	0.727	0.818	1	1	1	1	1	1		1705.03	1925.57	1680.88	2205.25	2005.44	2015.7	2011.52	1651.63	1525.81	1847.38
Firmicutes	Clostridia	Clostridiales	Peptostreptococcaceae	sf_5	134	84857	AF542228.1	Peptoniphilus asaccharolyticus str. CCUG 9988	0.926	0.897	0.786	0.75	0.731	0.769	0.679	0.714	0.714	0.821	0.793	0.75	0.786	0.704	0.769	0.741	0.679	0.808	0.821	0.76	0.778	0.679	0.643	0.769	0.964	0.679	0.679	0.786	0.857	0.75		2515.51	2273.32	2143.61	2254.1	2232.39	2199.61	2037.6	1916.46	1788.45	1969.75
Proteobacteria	Gammaproteobacteria	Enterobacteriales	Enterobacteriaceae	sf_1	9265	84349	AY253919.1	Rahnella aquatilis k 8	0.92	0.97	0.908	0.894	0.768	0.828	0.949	0.94	0.944	0.945	0.956	0.975	0.927	0.922	0.922	0.918	0.923	0.913	0.965	0.929	0.99	0.92	0.881	0.915	0.966	0.985	0.965	0.99	0.96	0.956		3718.3	2986.07	1903.61	931.149	792.066	1012.4	1977.43	2219.11	1758.07	2172.8
Proteobacteria	Gammaproteobacteria	Enterobacteriales	Enterobacteriaceae	sf_1	8505	10056	AJ233406.1	Buttiauxella warmboldiae str. DSM 9404	0.977	0.971	0.959	0.899	0.841	0.838	0.982	0.965	0.988	0.965	0.977	0.982	0.988	0.971	0.971	0.988	0.964	0.952	0.988	0.988	0.988	0.988	0.947	0.976	0.982	0.971	0.988	1	0.994	0.988		4113.84	3046.42	2129.06	1662.98	1654.91	1585.98	2469.78	2537.98	2136.85	2565.3
Proteobacteria	Gammaproteobacteria	Unclassified	Unclassified	sf_3	8743	NA			0.455	0.667	0.545	0.5	0.4	0.636	0.417	0.667	0.917	0.636	0.667	0.75	0.583	0.538	0.583	0.636	0.556	0.364	0.786	0.583	0.571	0.5	0.444	0.545	0.917	0.615	0.455	0.571	0.75	0.571		682.227	536.476	397.267	238.405	201.106	213.042	305.84	334.002	594.065	378.902
Chlorobi	Unclassified	Unclassified	Unclassified	sf_8	636	60814	AY118152.1	benzene-degrading nitrate-reducing consortium clone Cart-N3 bacterium	0.857	0.857	0.857	0.952	0.95	0.905	0.905	0.952	0.952	0.952	1	1	1	0.81	0.952	0.905	0.905	0.905	1	1	1	1	0.905	0.952	1	1	0.952	1	1	1		4104.14	3665.28	3374.5	3299.57	3548.01	2917.03	4078.2	3818.86	3135.59	3561.5
Proteobacteria	Epsilonproteobacteria	Campylobacterales	Campylobacteraceae	sf_3	10446	NA			0.955	1	1	1	1	1	0.952	0.955	1	0.955	1	1	0.909	0.905	0.952	0.909	0.909	0.952	0.955	0.955	0.955	0.955	0.909	0.909	1	1	0.955	1	1	1		3613.76	3491.89	3994.49	4904.9	5063.61	4005.01	4021.04	3708.61	3216.88	3846.13
Deinococcus-Thermus	Unclassified	Unclassified	Unclassified	sf_3	920	NA			1	1	1	1	1	1	1	1	1	1	1	1	1	1	1	1	1	1	1	1	1	1	1	1	1	1	1	1	1	1		2836.69	2769.56	2607.23	3253.65	3141.3	2948.9	2652.28	2450.43	2440.58	2687.67
Chlorobi	Chlorobia	Chlorobiales	Chlorobiaceae	sf_1	262	18641	Y18253.1	Chlorobium ferrooxidans DSM 13031 str. KofoX	0.933	0.933	0.933	0.933	0.933	0.933	0.933	0.933	0.933	0.933	0.933	0.933	0.933	0.933	0.933	0.933	0.933	0.933	0.933	0.933	0.933	0.933	0.933	0.933	0.933	0.933	0.933	0.933	0.933	0.933		3442.39	3072.28	2583.6	2939.03	3010.97	3079.09	2903.97	2869.82	2874.74	2779.22
Chloroflexi	Thermomicrobia	Unclassified	Unclassified	sf_1	1041	85874	AY250886.1	Antarctic cryptoendolith clone FBP471	0.929	0.929	0.769	1	0.923	0.929	0.929	1	0.929	1	1	1	0.929	0.857	1	0.857	0.929	0.929	1	0.929	1	0.929	0.923	1	1	0.929	0.929	0.929	0.929	0.929		2779.56	2449.59	1431.8	2264.85	2386.31	2366.22	2508.89	2342.34	2062.7	2620.59
Proteobacteria	Epsilonproteobacteria	Campylobacterales	Helicobacteraceae	sf_3	10482	57475	AJ441202.1	hydrothermal vent polychaete mucous clone P. palm C 140	0.8	0.812	0.875	0.875	0.875	0.938	0.812	0.875	0.875	0.875	0.875	0.875	0.875	0.75	0.867	0.875	0.875	0.875	0.812	0.812	0.812	0.875	0.812	0.875	0.875	0.875	0.812	0.875	0.875	0.812		2430.37	2195.72	2609.96	2107.54	2003.2	2228.75	2396.58	2786.59	2265.49	2591.58
Bacteroidetes	Bacteroidetes	Bacteroidales	Unclassified	sf_15	5874	57448	AJ441239.1	hydrothermal vent polychaete mucous clone P. palm A 53	1	1	1	1	1	1	1	1	1	1	1	1	1	1	1	0.909	1	1	1	1	1	1	1	1	1	1	1	1	1	1		3806.68	3790.78	3469.04	4042.15	3759.22	3391.37	4192.51	4098.82	3291.03	3982.1
Firmicutes	Clostridia	Clostridiales	Peptostreptococcaceae	sf_5	436	84656	AF550609.1	Peptostreptococcaceae bacterium 19gly3	0.897	0.967	0.929	1	0.964	1	0.833	0.833	0.833	0.867	0.9	0.871	0.833	0.862	0.897	0.833	0.833	0.867	0.9	0.903	0.867	0.867	0.893	0.867	0.903	0.871	0.867	0.935	0.903	0.903		3001.59	2691.96	2753.6	2905.81	2880.65	2479.12	2750.55	2563.92	2318.19	2614.24
Firmicutes	Clostridia	Clostridiales	Peptostreptococcaceae	sf_5	224	87725	AB109771.1	Finegoldia magna str. ATCC 29328	0.955	1	1	1	1	1	1	1	1	1	1	1	1	0.955	0.955	0.955	1	1	1	1	1	1	1	1	1	1	1	1	1	1		3414.37	3550.32	3772.67	2982.02	2826.72	2866.96	3517.66	3507.56	3051.62	3474.48
Firmicutes	Catabacter	Unclassified	Unclassified	sf_4	2716	77959	AB089010.1	termite gut homogenate clone Rs-F76 bacterium	0.938	1	0.969	0.903	0.9	0.903	0.939	0.939	0.938	0.939	0.97	0.97	0.906	0.903	0.879	0.875	0.906	0.938	1	0.97	0.97	0.938	0.933	1	1	0.969	0.909	1	0.97	0.939		3400.36	3154.67	2989.96	3615.17	3525.54	2866.96	3152.66	2881.71	2721.98	2919.72
Chlamydiae	Chlamydiae	Chlamydiales	Chlamydiaceae	sf_1	4820	112346	NC_002179.2	Chlamydophila pneumoniae str. AR39	0.929	0.929	0.929	0.929	1	1	1	1	0.929	1	1	1	0.929	0.929	0.857	1	1	1	0.929	0.929	1	0.929	0.929	1	1	1	1	1	1	1		3721.53	2884.52	3599.95	3935.64	4341.2	3358.6	3428.41	2923.87	2810.42	3302.25
Bacteroidetes	Bacteroidetes	Bacteroidales	Rikenellaceae	sf_5	5945	83262	AY208811.1	cave microbial mats clone LKC2.127-25	0.778	0.889	0.895	0.947	0.944	0.895	1	1	1	1	1	1	0.947	0.895	0.947	0.842	0.842	0.895	0.889	0.833	0.889	0.947	0.778	0.947	1	0.947	0.842	1	0.947	1		2595.27	2219.67	2214.51	1866.21	1818.94	1750.77	2416.64	2368.28	2236.01	2153.76
Thermotogae	Thermotogae	Thermotogales	Thermotogaceae	sf_4	51	72302	AJ419874.1	Thermosipho sp. str. MV1063	0.909	0.818	0.909	0.909	0.818	0.909	0.909	0.909	0.909	0.909	0.909	0.909	0.909	0.818	0.909	0.818	0.909	0.909	0.9	0.909	0.909	0.909	0.818	0.909	0.909	0.909	0.909	0.909	0.909	0.909		2149.07	1508.84	1787.25	1597.51	1753.78	2141.34	1609.42	1904.57	1808.1	1753.1
Chloroflexi	Dehalococcoidetes	Unclassified	Unclassified	sf_1	2397	63104	AY093480.1	deep marine sediment clone MB-C2-127	1	0.933	0.933	1	1	1	1	0.938	0.933	1	1	0.938	0.933	0.867	0.867	1	1	1	0.933	0.933	1	1	1	1	1	0.938	1	1	1	1		2783.88	2712.08	2428.15	2795.4	3027.83	2743.14	2990.21	2492.58	2379.83	2417.54
Acidobacteria	Acidobacteria	Acidobacteriales	Acidobacteriaceae	sf_14	508	75917	AJ519382.1	uranium mining waste pile clone JG37-AG-81 sp.	1	1	0.957	1	1	1	1	1	1	1	1	0.957	1	1	0.957	0.913	0.957	0.913	1	1	1	0.957	0.957	0.957	1	1	0.957	1	1	1		3446.7	3006.18	2659.96	3162.78	3054.79	2899.74	2705.43	2974.67	2324.45	3057.51
Proteobacteria	Gammaproteobacteria	Pseudomonadales	Pseudomonadaceae	sf_1	9422	30985	AJ289164.1	Cellvibrio fibrivorans str. R-4079	0.667	0.667	0.667	0.5	0.5	0.667	0.714	0.714	0.643	0.786	0.857	0.857	0.556	0.5	0.615	0.75	0.583	0.6	0.786	0.769	0.786	0.769	0.833	0.571	0.929	0.786	0.846	0.786	0.786	0.714		1245.9	1834.56	2029.06	2116.34	2912.11	2267.89	1061.92	1160.9	907.623	1393.24
Proteobacteria	Alphaproteobacteria	Rickettsiales	Rickettsiaceae	sf_1	7556	5950	U11014.1	Rickettsia bellii str. strains 369-C and G2D42	0.923	1	1	1	1	1	1	1	0.929	1	1	1	0.929	0.929	0.929	1	1	1	0.929	0.929	1	1	1	1	1	1	1	1	1	1		2423.9	2732.2	3273.59	3045.53	3561.49	3271.19	2351.46	2286.13	2456.66	2850.83
Actinobacteria	Actinobacteria	Actinomycetales	Streptomycetaceae	sf_1	1690	11733	X79325.1	Streptomyces galbus str. DSM40480	0.852	0.964	0.893	1	0.889	0.963	0.929	1	1	1	0.964	0.929	1	0.964	0.929	0.964	0.964	0.893	0.889	0.962	0.963	0.893	1	0.963	1	1	0.929	1	1	1		1951.84	1784.74	1598.16	1454.86	1081.93	1289.18	2189.01	2281.8	2362.86	1891.79
Acidobacteria	Acidobacteria	Acidobacteriales	Acidobacteriaceae	sf_6	6362	3732	Y07646.1	grassland soil clone DA052	1	1	1	1	1	1	1	1	1	1	1	1	1	1	1	1	1	1	1	1	1	1	1	1	1	1	1	1	1	1		3815.3	3470.81	4108.12	3133.47	2927.84	3283.03	4018.03	4360.4	3604.59	3826.19
Proteobacteria	Gammaproteobacteria	Thiotrichales	Thiotrichaceae	sf_3	8477	60452	AF532774.1	marine sediment clone Limfjorden L8	0.897	1	1	0.872	0.865	0.921	1	0.974	1	1	1	1	0.949	0.897	0.921	1	1	0.947	1	1	0.974	1	0.872	0.974	1	1	0.949	0.974	1	0.949		2681.49	3143.18	3345.41	2654.7	2481.81	2449.98	3142.63	2947.65	2686.24	3109.17
Firmicutes	Desulfotomaculum	Unclassified	Unclassified	sf_1	2490	67543	AY084078.1	Desulfotomaculum solfataricum str. V21	1	1	1	1	1	1	1	1	1	1	1	1	1	1	1	1	1	1	1	1	1	1	1	1	1	1	1	1	1	1		3732.31	3219.82	2722.69	3209.68	3459.25	3434.16	3162.68	3014.66	2819.35	3126.4
Proteobacteria	Gammaproteobacteria	Oceanospirillales	Oceanospirillaceae	sf_1	8345	8195	AF140000.1	Oceanospirillum sp. str. ML-158	0.632	0.762	0.556	0.684	0.579	0.889	0.714	0.714	0.7	0.667	0.762	0.714	0.7	0.579	0.714	0.632	0.4	0.524	0.762	0.6	0.7	0.55	0.5	0.45	0.909	0.667	0.524	0.714	0.9	0.81		628.339	503.905	615.446	389.852	375.248	702.856	356.98	378.319	481.505	453.232
Firmicutes	Bacilli	Bacillales	Bacillaceae	sf_1	3900	14721	X68416.1	Bacillus licheniformis str. DSM 13	1	0.935	0.967	0.741	0.778	0.893	1	1	1	1	1	1	0.967	0.964	0.967	1	0.967	0.933	1	1	0.968	0.933	0.966	1	1	1	1	1	1	1		1484.09	2063.52	1829.06	2138.81	2012.19	1717.99	1664.57	1573.81	1536.53	1697.81
Spirochaetes	Spirochaetes	Spirochaetales	Spirochaetaceae	sf_1	6554	78084	AB088889.1	termite gut homogenate clone Rs-A43 sp.	0.982	0.931	0.914	0.915	0.879	0.915	0.915	0.949	0.915	0.932	0.949	0.949	0.898	0.847	0.898	0.881	0.915	0.915	0.948	0.898	0.915	0.915	0.895	0.949	0.966	0.949	0.931	0.949	0.949	0.949		2650.23	2474.5	2443.6	2209.16	2297.55	2302.49	2487.83	2325.04	2120.77	2572.55
Proteobacteria	Alphaproteobacteria	Unclassified	Unclassified	sf_6	7229	61821	AF529343.1	PCE-contaminated site clone CLi8	0.824	1	1	0.842	0.842	0.842	0.842	0.947	0.842	1	1	1	0.842	0.789	0.737	0.789	0.842	0.895	1	0.842	0.947	0.842	0.737	0.842	1	1	0.947	1	1	1		2378.64	2225.42	2328.15	2412.39	2431.25	2346.19	1817.99	2229.92	2087.71	2181.86
Spirochaetes	Spirochaetes	Spirochaetales	Spirochaetaceae	sf_1	6562	63291	AF523928.1	forested wetland clone RCP1-96	1	0.968	1	1	0.967	0.935	0.938	0.969	0.968	0.938	0.969	1	1	0.968	0.968	0.968	0.938	0.938	0.938	0.968	0.969	0.968	1	0.969	1	0.968	1	0.938	0.969	0.968		2098.42	2272.36	2479.05	1593.6	1553.8	1875.5	2025.56	2007.25	1919.77	2244.41
Proteobacteria	Gammaproteobacteria	Enterobacteriales	Enterobacteriaceae	sf_1	9142	9832	AJ233410.1	Erwinia amylovora str. DSM 30165	0.949	0.958	0.949	0.88	0.827	0.814	0.966	0.975	0.983	0.966	0.975	0.975	0.983	0.957	0.975	0.992	0.958	0.949	0.992	0.983	1	0.991	0.94	0.975	0.983	0.992	0.992	1	1	0.992		4190.36	3000.44	2016.33	1955.12	1957.13	1758.96	2401.59	2483.94	2087.71	2544.45
Proteobacteria	Deltaproteobacteria	Unclassified	Unclassified	sf_9	244	63100	AY093483.1	deep marine sediment clone MB-C2-152	0.789	0.947	0.842	0.895	0.944	0.944	1	1	1	1	0.947	1	0.947	0.944	1	0.944	0.944	0.944	0.947	0.947	0.944	0.944	0.944	0.944	0.947	0.947	0.944	0.947	0.947	0.947		2986.5	2615.32	2435.42	2337.16	2361.59	2617.5	2793.67	2741.19	2377.15	2713.96
OP10	CH21 cluster	Unclassified	Unclassified	sf_1	326	85439	AY222300.1	geothermal clone ST01-SN3H	1	1	1	1	0.969	0.938	1	1	1	1	1	1	1	1	1	1	1	1	1	1	1	1	1	1	1	1	1	1	1	1		3463.95	3177.66	3099.96	2738.73	2671.68	3063.61	3133.61	3280.57	3183.83	3229.73
Spirochaetes	Spirochaetes	Spirochaetales	Spirochaetaceae	sf_1	6583	78252	AB088875.1	termite gut homogenate clone Rs-J42 sp.	0.978	0.933	0.955	0.932	0.907	0.932	0.933	0.978	0.933	0.933	0.956	0.956	0.933	0.841	0.911	0.911	0.933	0.933	1	0.911	0.933	0.933	0.93	0.978	0.977	0.956	0.955	0.956	0.956	0.956		2981.11	2668.97	2791.78	2264.85	2460.46	2389.89	2498.86	2462.32	2035.9	2633.28
Fusobacteria	Fusobacteria	Fusobacterales	Fusobacteriaceae	sf_3	426	76867	AF550592.1	Fusobacteria Ko711	0.864	0.762	0.682	0.87	0.857	0.955	0.762	0.727	0.81	0.857	0.818	0.739	0.857	0.81	0.682	0.75	0.714	0.682	0.682	0.762	0.636	0.8	0.714	0.652	0.864	0.81	0.714	0.857	0.952	0.857		1717.96	1572.07	1954.52	1987.36	2234.64	1808.12	1822	1582.45	1799.17	1698.72
Firmicutes	Bacilli	Lactobacillales	Streptococcaceae	sf_1	3869	81475	AB104843.1	Streptococcus equi subsp. zooepidemicus str. Tokyo1291 subsp.	1	1	1	0.917	0.833	0.917	0.917	0.917	1	1	1	0.917	1	0.917	1	1	1	1	1	1	1	1	0.833	0.917	1	1	1	1	1	1		1592.94	2520.48	1975.43	1332.73	1477.4	2280.64	1721.73	1902.4	1853.66	2034.11
TM7	Unclassified	Unclassified	Unclassified	sf_1	3679	NA			0.818	0.9	1	1	0.909	1	1	1	0.833	1	1	1	0.833	0.909	0.833	0.769	0.769	0.769	0.846	0.769	0.769	0.769	0.769	0.769	1	1	1	1	1	1		1881.78	2418.93	2159.97	1913.11	1644.8	2467.28	2517.91	2339.09	2527.23	2224.46
Proteobacteria	Gammaproteobacteria	Thiotrichales	Piscirickettsiaceae	sf_3	8664	7698	AJ237758.1	Thiomicrospira sp. str. Milos-T2	1	0.958	0.96	0.96	0.96	0.96	1	1	1	0.96	0.96	0.96	0.92	0.96	0.96	0.96	0.96	0.92	0.92	1	0.96	0.96	0.92	0.96	0.96	0.96	1	0.96	0.958	0.958		2933.69	2550.18	2203.6	2383.08	2376.2	2301.58	2422.65	2595.27	2523.66	2486.43
Proteobacteria	Gammaproteobacteria	Enterobacteriales	Enterobacteriaceae	sf_1	9390	10042	Z96077.1	Enterobacter nimipressuralis str. LMG 10245-T	0.974	0.967	1	0.934	0.861	0.896	0.987	0.98	0.993	0.98	0.993	0.987	0.993	0.974	0.974	0.993	0.967	0.928	0.993	0.993	1	0.993	0.928	0.987	0.98	0.987	0.993	1	1	1		4196.83	3248.56	2204.51	1596.54	1578.51	1609.65	2534.96	2659.04	2177.05	2694.92
Bacteroidetes	Flavobacteria	Flavobacteriales	Flavobacteriaceae	sf_1	5297	NA			0.667	0.643	0.692	0.938	0.938	0.938	0.875	0.8	0.875	0.667	0.733	0.875	1	0.875	0.875	0.75	0.75	0.812	0.688	0.867	0.733	0.75	0.733	0.875	0.812	0.667	0.625	0.733	0.8	0.786		2218.05	1706.19	1918.15	3211.63	3507.56	3012.63	2387.56	2116.43	2319.98	1866.41
Cyanobacteria	Cyanobacteria	Chloroplasts	Chloroplasts	sf_11	5098	20563	AF289245.1	Euglena tripteris str. UW OB	1	1	1	1	0.955	1	1	1	0.952	1	0.955	1	0.952	0.952	0.952	1	1	1	0.952	0.952	1	0.952	0.955	0.955	0.955	0.955	0.955	0.955	0.955	1		3050.08	2551.14	3064.5	3449.06	3607.55	3424.15	2896.96	2437.46	2619.24	2907.94
Chlorobi	Chlorobia	Chlorobiales	Chlorobiaceae	sf_1	906	NA			0.933	0.9	0.781	0.867	0.867	0.839	0.844	0.844	0.844	0.875	0.875	0.903	0.844	0.871	0.833	0.9	0.806	0.767	0.933	0.871	0.75	0.839	0.742	0.75	0.935	0.933	0.774	0.839	0.871	0.903		2734.3	2554.97	2059.97	2722.12	2743.58	2521.91	2804.7	2797.4	2599.59	2488.25
Bacteroidetes	Sphingobacteria	Sphingobacteriales	Crenotrichaceae	sf_11	5347	73931	AJ290034.1	Austria: Lake Gossenkoellesee clone GKS2-217 GKS2-217	0.636	0.455	0.455	0.545	0.545	0.636	0.833	0.9	0.7	0.818	0.909	0.727	0.7	0.545	0.5	0.364	0.5	0.545	0.636	0.6	0.6	0.6	0.333	0.4	0.909	0.8	0.364	0.8	0.833	0.545		222.02	228.002	258.178	223.749	178.636	269.489	245.675	305.898	467.212	299.133
Firmicutes	Bacilli	Bacillales	Bacillaceae	sf_1	3345	101580	AY548955.1	Bacillus pumilus str. S9	0.958	0.852	0.96	0.609	0.682	0.75	0.923	0.923	0.962	0.923	0.923	0.962	0.885	0.833	0.846	0.923	0.923	0.808	0.963	0.885	0.926	0.885	0.84	0.923	1	0.923	0.923	0.962	0.962	0.962		1041.12	1500.22	1299.98	1171.51	1143.72	1019.69	880.418	852.839	954.077	1090.48
Firmicutes	Bacilli	Bacillales	Bacillaceae	sf_1	3706	30966	AF302119.1	Bacillus sonorensis str. NRRL B-23155	0.957	0.904	0.847	0.597	0.609	0.667	0.959	0.945	0.932	0.973	0.959	0.986	0.918	0.672	0.863	0.945	0.945	0.795	0.973	0.833	0.932	0.863	0.662	0.932	1	0.973	0.904	0.973	0.973	0.959		1334.28	1687.03	1403.62	1419.69	1417.85	1352.91	1120.08	1151.17	1164.01	1317.09
Cyanobacteria	Unclassified	Unclassified	Unclassified	sf_5	4998	NA			1	1	1	1	1	1	1	1	1	1	1	1	1	1	1	1	1	1	1	1	1	1	1	1	1	1	1	1	1	1		2691.19	2585.62	2609.05	3697.24	3471.61	3601.68	3439.44	3133.56	3228.5	3798.99
Actinobacteria	Actinobacteria	Acidimicrobiales	Unclassified	sf_1	1666	NA			0.923	0.923	1	0.846	0.923	0.923	0.923	0.923	1	1	1	0.923	1	0.923	0.923	1	0.923	0.923	0.923	0.923	0.923	1	0.923	0.923	0.923	1	0.923	1	1	1		1609.11	1694.69	1705.43	1681.54	1406.62	1357.46	2393.57	1894.84	2220.82	1933.49
Bacteroidetes	Unclassified	Unclassified	Unclassified	sf_4	5637	NA			0.909	0.818	0.818	1	1	1	0.909	0.909	0.909	0.909	0.909	0.909	0.909	0.909	0.909	0.727	0.818	0.818	0.818	0.818	0.818	0.909	0.9	0.818	0.909	0.909	0.818	1	1	0.909		4058.88	3365.43	3524.49	4926.4	4882.72	3592.58	4076.19	4018.83	3733.23	3438.22
Proteobacteria	Gammaproteobacteria	Alteromonadales	Alteromonadaceae	sf_1	8520	20204	AB059262.1	Moritella sp. str. PS10-13	0.909	1	0.727	0.75	0.5	0.75	0.769	0.846	0.917	0.846	0.846	0.917	0.769	0.667	0.636	0.769	0.727	0.75	0.923	0.833	0.846	0.615	0.778	0.583	0.846	1	0.692	0.769	0.833	0.833		1121.96	1108.4	746.353	279.442	296.604	705.587	788.164	822.574	889.757	818.538
Proteobacteria	Gammaproteobacteria	Vibrionales	Vibrionaceae	sf_1	9223	83211	AY245191.1	Vibrio parahaemolyticus 22	0.979	0.897	0.781	0.979	0.93	0.937	0.965	0.958	0.979	0.957	0.972	0.964	0.993	0.979	0.986	0.91	0.847	0.844	0.944	0.905	0.936	0.854	0.72	0.849	0.958	0.912	0.905	0.915	0.928	0.907		2861.48	2316.43	1801.79	1986.39	1769.51	1808.12	2358.48	2246.13	2239.58	2126.57
Proteobacteria	Gammaproteobacteria	Oceanospirillales	Unclassified	sf_3	8961	7673	M99446.1	Calyptogena magnifica symbiont	0.923	0.917	0.583	0.917	0.917	0.917	0.692	0.818	0.75	0.833	0.917	0.692	0.75	0.6	0.444	0.636	0.727	0.7	0.692	0.636	0.692	0.778	0.545	0.583	0.923	0.818	0.727	1	1	1		855.748	558.51	439.994	736.712	601.071	941.39	191.526	199.969	231.373	361.679
Acidobacteria	Solibacteres	Unclassified	Unclassified	sf_1	6367	62412	AF529104.1	TCE-contaminated site clone FTL227	0.957	1	0.875	0.792	0.773	0.905	0.96	0.96	1	1	1	1	0.92	0.88	0.958	0.87	0.92	0.88	0.96	0.958	0.958	0.958	0.913	0.92	1	1	1	1	1	1		2138.29	1913.11	1788.16	1531.07	1762.77	1490.38	2123.83	2053.73	2075.21	1928.05
Firmicutes	Clostridia	Clostridiales	Peptostreptococcaceae	sf_5	2679	41514	AB062845.1	termite gut homogenate clone BCf9-13	0.958	1	0.917	0.87	0.864	0.909	0.958	0.958	0.957	0.958	0.958	0.958	0.957	0.913	0.957	0.957	0.917	0.957	1	0.958	0.917	0.957	0.957	1	1	0.958	0.958	1	1	0.958		3240.85	3123.06	2825.41	2870.64	2769.42	2388.98	2803.7	2320.72	2179.73	2480.09
Proteobacteria	Gammaproteobacteria	Xanthomonadales	Xanthomonadaceae	sf_3	8538	NA			0.696	0.875	1	0.8	0.842	0.9	0.818	0.864	0.905	0.905	0.955	0.957	0.955	0.762	0.682	0.864	0.864	0.773	0.917	0.818	0.792	0.857	0.8	0.773	0.875	0.909	0.81	0.857	0.952	0.952		620.795	985.775	1339.07	554	642.641	762.034	673.85	879.862	921.917	862.048
Proteobacteria	Gammaproteobacteria	Enterobacteriales	Enterobacteriaceae	sf_1	8343	NA			0.667	0.818	0.727	0.636	0.545	0.6	0.636	0.636	0.818	0.636	0.636	0.727	0.727	0.818	0.818	0.8	0.7	0.7	0.727	0.727	0.818	0.818	0.8	0.818	0.909	0.818	0.818	0.727	0.909	0.818		1435.59	1434.12	1102.71	426.003	226.947	599.977	1075.95	1197.65	1326.6	1096.82
Chloroflexi	Anaerolineae	Chloroflexi-1f	Unclassified	sf_1	27	22922	AJ249103.1	DCP-dechlorinating consortium clone SHA-21	0.806	0.816	0.795	0.825	0.795	0.846	0.805	0.829	0.865	0.902	0.929	0.902	0.842	0.833	0.778	0.943	0.865	0.816	0.838	0.886	0.789	0.865	0.838	0.846	0.951	0.846	0.872	0.857	0.902	0.878		1770.77	1515.55	1505.43	1473.42	1735.8	1758.96	1412.88	1487.33	1505.26	1495.67
Proteobacteria	Alphaproteobacteria	Bradyrhizobiales	Beijerinck/Rhodoplan/Methylocyst	sf_3	7239	35557	AF358664.1	Thalassospira lucentensis	0.882	0.882	0.875	0.824	0.882	0.824	0.882	0.882	0.875	0.882	0.882	0.882	0.938	0.933	0.938	0.938	0.938	0.938	0.938	0.938	0.938	0.938	0.875	0.938	0.938	0.882	0.882	0.882	0.938	0.938		3123.37	2526.23	2101.79	2422.16	2779.53	2911.57	2028.57	2234.24	2582.62	2342.31
Actinobacteria	Actinobacteria	Actinomycetales	Kribbella	sf_1	1839	102895	AY253862.1	Kribbella solani str. DSA1	0.75	0.917	0.727	0.714	0.714	0.857	0.857	0.75	0.857	0.667	0.545	0.6	0.75	0.857	0.556	0.75	0.857	0.556	0.273	0.5	0.818	0.75	0.714	0.6	0.692	0.75	0.6	0.6	0.818	0.6		254.353	298.894	1011.8	1441.18	2061.62	1245.48	283.779	308.06	889.757	444.168
Firmicutes	Clostridia	Clostridiales	Peptostreptococcaceae	sf_5	2805	59565	AY134904.1	oral periodontitis clone FX033	0.958	0.979	0.979	0.957	0.957	0.957	0.979	0.979	0.979	0.979	0.979	0.979	0.936	0.978	0.979	0.979	0.957	1	1	1	0.979	0.979	0.979	0.979	1	0.979	0.979	0.979	0.979	0.957		3940.32	3603.01	3504.49	3095.36	2884.02	2834.19	3446.46	3359.47	2681.78	3442.75
Spirochaetes	Spirochaetes	Spirochaetales	Spirochaetaceae	sf_1	6472	59907	AY133086.1	TCE-contaminated site clone ccslm2126	0.583	0.667	0.727	0.462	0.778	0.545	0.615	0.727	0.75	0.846	0.786	0.846	0.833	0.7	0.538	0.692	0.545	0.571	0.571	0.727	0.615	0.75	0.9	0.667	0.923	0.833	0.615	0.75	0.846	0.909		647.739	1231.02	1310.89	442.613	498.833	451.576	759.084	991.196	812.93	1068.72
Proteobacteria	Gammaproteobacteria	Enterobacteriales	Enterobacteriaceae	sf_1	8225	NA			1	0.958	0.957	1	1	1	0.958	1	1	0.958	0.958	0.958	0.958	0.917	1	0.958	1	0.917	1	0.958	1	1	0.792	0.958	0.958	1	0.958	1	1	1		3267.79	2794.47	2779.05	2855.98	2819.98	2925.23	2725.48	2826.58	2684.46	2848.11
Proteobacteria	Gammaproteobacteria	Enterobacteriales	Enterobacteriaceae	sf_1	9157	42020	AF293618.1	Secondary symbiont type-U Acyrthosiphon pisum (rrs) clone 5B type-U	0.93	0.977	0.953	0.953	0.907	0.907	0.909	0.909	0.953	0.953	0.932	0.93	0.953	0.93	0.975	0.907	0.93	0.952	0.955	0.932	1	0.93	0.93	0.93	1	0.977	0.953	0.955	0.977	0.955		3482.27	2735.07	2720.87	2420.21	2460.46	2484.58	2893.95	2787.67	2555.82	2692.2
Chlorobi	Chlorobia	Chlorobiales	Chlorobiaceae	sf_1	859	2673	Y08105.1	Chlorobium phaeovibrioides str. 2631	0.95	0.905	0.905	0.952	0.952	0.905	0.952	0.952	0.952	0.952	0.952	0.952	0.952	0.952	0.952	0.952	0.952	0.952	0.952	0.952	0.952	0.952	0.952	0.952	0.952	0.952	0.952	0.952	0.952	0.952		3037.15	2760.94	2249.06	2637.12	2627.86	2523.73	3163.69	3310.83	2993.55	2875.31
Firmicutes	Clostridia	Clostridiales	Peptostreptococcaceae	sf_5	2988	82172	AB100461.1	termite gut clone Rs-050	0.8	0.8	0.733	0.857	0.786	0.857	0.733	0.733	0.769	0.8	0.8	0.867	0.769	0.833	0.769	0.769	0.714	0.667	0.733	0.769	0.786	0.714	0.769	0.786	0.933	0.857	0.857	0.8	0.867	0.933		2295.65	2302.06	1830.88	1659.07	1723.45	1571.41	1671.59	1717.57	1549.03	1751.29
Proteobacteria	Epsilonproteobacteria	Campylobacterales	Helicobacteraceae	sf_3	10602	NA			0.933	0.778	0.941	1	1	0.938	0.812	0.882	0.938	0.778	0.875	0.882	1	1	0.812	0.875	0.938	1	0.941	0.882	0.882	0.938	0.882	0.882	0.882	0.938	0.938	0.824	0.824	0.824		1514.26	1574.94	2303.6	1619.01	1529.08	1586.89	2005.51	1759.72	1526.7	1691.46
Firmicutes	Clostridia	Clostridiales	Clostridiaceae	sf_12	4589	16255	X68176.1	Clostridium butyricum str. ATCC43755	0.97	0.99	0.955	0.908	0.891	0.933	0.96	0.985	0.975	0.985	0.99	0.99	0.955	0.897	0.922	0.944	0.944	0.959	0.99	0.97	0.98	0.985	0.935	0.99	1	0.99	0.965	0.985	0.995	0.98		2603.89	2791.59	2466.33	2001.04	1866.13	1891.88	2292.29	2317.47	1914.41	2373.13
Firmicutes	Bacilli	Bacillales	Caryophanaceae	sf_1	3285	64192	AJ491302.1	Caryophanon latum str. DSM 14151	0.974	0.95	0.963	0.833	0.824	0.885	0.963	0.975	0.988	0.975	0.975	0.975	0.975	0.937	0.951	0.951	0.95	0.901	0.952	0.963	0.963	0.938	0.924	0.963	1	0.963	0.926	0.951	0.988	0.975		2282.71	2507.07	2121.79	2281.46	2255.98	1975.64	1967.4	1947.8	1929.59	2147.42
Actinobacteria	Actinobacteria	Actinomycetales	Promicromonosporaceae	sf_1	1671	12309	X79453.1	Cellulosimicrobium cellulans str. NCIMB 11025	0.98	0.962	0.92	0.96	0.958	0.979	0.961	1	0.961	0.962	0.942	0.942	0.962	0.961	0.98	1	0.98	0.94	0.98	0.98	0.98	0.96	0.936	0.98	1	0.962	0.923	0.962	1	1		2178.17	2280.02	2099.06	2423.14	2281.82	2363.49	2295.3	2395.3	2627.28	2046.8
Spirochaetes	Spirochaetes	Spirochaetales	Spirochaetaceae	sf_1	6580	3918	AF056341.1	Treponema sp. str. III:C:BA213	1	0.971	0.971	1	0.944	1	1	1	1	1	1	1	0.972	0.971	1	1	1	1	0.971	0.972	1	1	0.944	0.972	0.972	1	1	0.972	1	1		2488.57	2049.15	2631.78	2146.63	2230.14	2460.91	2352.46	2206.14	2186.87	2413.92
Proteobacteria	Gammaproteobacteria	Oceanospirillales	Halomonadaceae	sf_1	8514	37191	AJ295144.1	Chromohalobacter israelensis str. ATCC 43985 T	1	0.972	0.973	0.944	0.971	0.917	1	0.973	0.973	1	0.973	0.973	0.946	0.944	1	0.946	0.973	0.973	0.973	0.973	0.973	0.946	0.971	0.973	0.973	0.973	0.973	0.973	0.973	0.973		3217.14	2353.79	2354.51	2008.86	2187.45	2073.06	2357.47	2191.01	2261.02	2556.23
Proteobacteria	Alphaproteobacteria	Rhodobacterales	Rhodobacteraceae	sf_1	6882	5793	AF035433.1	Rhodobacter apigmentum	0.533	0.722	0.75	0.909	0.9	0.9	0.818	0.857	0.955	0.773	0.9	0.818	1	0.955	0.909	0.842	0.857	0.818	0.75	0.833	0.737	0.95	0.833	0.9	0.773	0.9	0.684	0.75	0.8	0.8		978.614	821	1183.62	1527.16	1602.11	1482.19	1243.41	1227.92	1513.3	977.169
Cyanobacteria	Cyanobacteria	Chloroplasts	Chloroplasts	sf_5	5040	69031	Y18934.1	Solanum nigrum	1	1	1	1	1	1	1	1	1	1	1	1	1	1	1	1	1	1	1	1	1	1	1	1	1	1	1	1	1	1		2121.05	2264.7	2024.52	2977.14	2873.91	3155.57	2790.66	2438.54	2618.35	3417.37
Actinobacteria	Actinobacteria	Actinomycetales	Streptomycetaceae	sf_1	1354	11806	X80825.1	Streptomyces subrutilus str. DSM 40445	0.929	0.964	0.929	0.963	0.926	0.963	0.964	1	0.964	1	1	0.929	1	0.964	0.964	1	1	1	0.964	0.963	0.964	0.964	0.929	0.964	1	1	0.964	1	1	1		2212.66	2173.69	1937.24	1673.72	1450.44	1803.57	2571.06	2593.11	2648.72	2183.67
Actinobacteria	Actinobacteria	Actinomycetales	Micrococcaceae	sf_1	1213	12499	X87756.1	Kocuria roseus	0.96	0.923	0.96	0.875	0.875	0.917	0.885	1	0.88	0.962	0.962	0.923	0.885	0.88	0.88	0.92	0.96	0.958	1	0.923	1	0.88	0.833	0.846	1	0.962	0.962	1	1	1		2127.52	2234.04	2226.33	2833.51	2711	2536.47	2024.56	2218.03	2492.39	1744.04
Proteobacteria	Gammaproteobacteria	Unclassified	Unclassified	sf_3	8967	NA			0.636	0.818	0.818	0.917	0.818	0.818	0.917	0.917	0.909	0.917	0.917	1	0.818	0.909	0.636	0.75	0.818	0.667	0.818	0.909	0.75	0.833	0.727	0.75	0.917	0.833	0.769	0.917	1	0.917		158.432	914.884	649.991	362.494	271.887	589.052	596.638	600.987	743.251	676.223
Proteobacteria	Deltaproteobacteria	Desulfobacterales	Nitrospinaceae	sf_1	580	19976	AF355044.1	marine clone Arctic97A-12	0.926	0.889	0.852	0.885	0.923	0.885	0.852	0.889	0.885	0.852	0.852	0.852	0.852	0.92	0.852	0.852	0.885	0.852	0.923	0.889	0.852	0.889	0.885	0.852	0.893	0.857	0.852	0.889	0.929	0.821		2443.3	2881.64	2836.32	2486.65	2398.67	2306.13	2638.24	2496.91	2333.38	2589.77
Firmicutes	Clostridia	Clostridiales	Clostridiaceae	sf_12	3021	67640	AF458779.1	Clostridium caminithermale str. DVird3	0.972	1	0.944	0.944	0.917	0.917	0.972	0.944	0.944	0.944	0.944	0.972	0.917	0.943	0.972	0.917	0.889	0.971	1	0.972	0.972	0.917	0.889	0.943	1	0.944	0.917	1	0.972	0.944		2657.78	3101.98	2741.78	2808.1	2645.84	2442.7	2959.13	2512.04	2287.82	2732.99
Chloroflexi	Dehalococcoidetes	Unclassified	Unclassified	sf_1	2497	74169	AF524015.1	forested wetland clone FW60	1	0.917	1	0.917	0.917	0.917	0.917	0.846	0.917	1	1	0.923	1	1	0.917	1	0.917	0.917	0.917	0.917	1	0.917	0.917	0.917	1	0.923	1	1	1	1		4556.81	3906.7	3976.31	5071	5309.65	4211.67	4716.95	3782.11	3824.35	3643.08
Firmicutes	Clostridia	Clostridiales	Clostridiaceae	sf_12	4480	73000	AF275949.1	Clostridium neonatale str. LCDC no.99--005	0.812	0.938	0.231	0.231	0.077	0.154	0.438	0.562	0.429	0.875	0.75	0.938	0.4	0.333	0.133	0.267	0.2	0.2	0.533	0.938	0.875	0.6	0.357	0.6	1	0.867	0.625	0.562	0.812	0.938		391.23	516.358	216.36	85.9823	35.9519	106.521	84.2313	140.519	158.119	288.256
Actinobacteria	Actinobacteria	Actinomycetales	Cellulomonadaceae	sf_1	1586	12338	X83800.1	Cellulomonas gelida str. DSM 20111T	1	1	1	0.955	0.955	1	0.957	1	0.957	1	1	0.957	1	0.957	0.957	1	1	1	1	1	1	0.957	0.909	0.957	1	1	1	1	1	1		2440.07	2691.96	2378.15	3022.08	3253.65	2815.07	2388.56	2212.63	2604.95	2045.89
Firmicutes	Clostridia	Clostridiales	Clostridiaceae	sf_12	4353	16246	X68171.1	Clostridium botulinum str. Eklund 202F ATCC23387	0.6	0.652	0.5	0.476	0.524	0.632	0.5	0.522	0.571	0.632	0.522	0.636	0.524	0.556	0.375	0.409	0.478	0.417	0.5	1	1	0.565	0.375	0.458	0.636	0.65	0.391	0.522	0.7	0.591		204.776	567.132	430.903	138.744	123.585	261.295	81.223	109.172	124.173	174.948
Proteobacteria	Gammaproteobacteria	SUP05	Unclassified	sf_1	8605	79242	AF382104.1	bacterioplankton clone ZA2525c	0.842	0.95	1	1	1	1	1	1	1	1	1	1	1	1	1	0.95	1	0.95	1	1	1	1	1	1	1	1	1	1	1	1		4190.36	3511.05	3139.95	3855.52	3981.68	3586.2	3078.45	3351.91	2545.99	3339.42
Bacteroidetes	Sphingobacteria	Sphingobacteriales	Sphingobacteriaceae	sf_1	6185	112258	AJ878852.1	Sphingobacterium spiritivorum B1	0.739	0.76	0.818	0.857	0.762	0.762	0.792	0.792	0.826	0.792	0.76	0.769	0.818	0.783	0.87	0.783	0.864	0.833	0.76	0.864	0.792	0.792	0.95	0.833	0.962	0.885	0.769	0.692	0.846	0.75		2219.13	2041.48	2399.06	2925.35	3134.56	2666.67	2658.3	2515.28	2659.44	2309.67
Bacteroidetes	Flavobacteria	Flavobacteriales	Flavobacteriaceae	sf_1	6140	NA			0.85	0.909	0.85	0.909	0.909	0.857	0.909	0.955	0.955	0.87	0.955	0.909	0.909	0.909	0.955	0.905	0.905	0.905	0.905	0.857	0.905	0.864	0.857	0.905	0.909	0.857	0.818	0.818	0.955	0.818		3100.74	2801.17	3150.86	3859.43	4034.48	3174.69	3517.66	3411.36	3317.83	2959.61
Firmicutes	Symbiobacteria	Symbiobacterales	Unclassified	sf_3	3508	44578	AF190460.1	Symbiobacterium toebii str. SC-1	0.85	0.9	0.85	0.895	0.895	0.842	0.95	0.95	0.895	0.95	0.95	0.95	0.85	0.842	0.895	0.895	0.85	0.9	0.95	0.9	0.9	0.85	0.895	0.9	0.95	0.9	0.9	0.9	0.95	0.9		2340.91	2365.29	2024.52	2166.17	1998.7	2165.93	1935.31	1916.46	1751.82	2375.84
Bacteroidetes	Sphingobacteria	Sphingobacteriales	Flexibacteraceae	sf_19	5366	58627	AB078061.1	Flexibacter roseolus str. IFO 16030	0.929	1	0.857	1	1	1	1	1	1	1	1	1	1	1	1	1	1	1	1	1	1	1	0.929	1	1	1	1	1	1	1		2667.48	2532.93	2419.06	2060.64	1704.35	2159.55	3168.7	3104.38	3136.48	3051.16
Firmicutes	Clostridia	Clostridiales	Peptostreptococcaceae	sf_5	17	59528	AF538859.1	Peptostreptococcus sp. oral clone P4PA_156 P4 oral	0.923	1	0.808	0.815	0.769	0.741	0.778	0.815	0.815	0.889	0.889	0.889	0.815	0.741	0.88	0.8	0.704	0.84	0.923	0.8	0.84	0.778	0.741	0.84	0.963	0.808	0.741	0.852	0.889	0.852		2575.87	2374.87	2274.51	2477.85	2371.7	2158.64	2263.21	2034.28	1880.46	2112.97
Firmicutes	Catabacter	Unclassified	Unclassified	sf_4	4170	66191	AJ488074.1	chlorobenzene-degrading consortium clone IA-23	0.8	0.682	0.895	0.6	0.579	0.737	0.727	0.773	0.889	0.826	0.826	0.826	0.941	0.65	0.6	0.889	0.833	0.75	0.826	0.714	0.762	0.727	0.737	0.762	0.818	0.85	0.696	0.826	0.818	0.818		2543.53	2222.54	2659.05	2595.1	2724.48	2080.34	2351.46	2178.04	2271.74	2065.83
Proteobacteria	Gammaproteobacteria	Enterobacteriales	Enterobacteriaceae	sf_1	8379	20321	AF289542.1	Erwinia amylovora EA G-5	0.939	0.962	0.947	0.854	0.78	0.81	0.962	0.97	0.97	0.962	0.977	0.97	0.962	0.938	0.947	0.992	0.939	0.924	0.992	0.985	1	0.992	0.931	0.97	0.992	0.992	1	1	1	0.992		4206.53	3102.94	2064.52	1943.4	1867.25	1861.84	2486.83	2560.68	2148.46	2569.83
Cyanobacteria	Cyanobacteria	Oscillatoriales	Unclassified	sf_1	5189	47726	AB039015.1	Oscillatoria sancta str. PCC 7515	1	1	0.917	1	1	1	1	1	1	1	1	1	1	1	0.917	1	1	0.917	0.917	0.917	0.917	1	1	1	1	1	1	1	1	1		1694.25	2107.59	1587.25	3252.67	3204.22	3407.76	3105.53	2684.98	2713.04	3740.07
Cyanobacteria	Cyanobacteria	Chloroplasts	Chloroplasts	sf_5	5006	NA			1	1	1	1	1	1	1	1	1	1	1	1	1	1	1	1	1	1	1	1	1	1	1	1	1	1	1	1	1	1		1636.05	2266.61	1460.89	2653.73	2509.89	2947.99	2665.32	2094.81	2301.22	3196.2
TM6	Unclassified	Unclassified	Unclassified	sf_1	10203	61498	AY043739.1	forest soil clone NOS7.2WL	0.7	0.818	0.9	0.818	0.818	0.818	0.909	0.818	0.818	0.909	0.909	0.909	0.818	0.727	0.636	0.818	0.909	0.818	0.818	0.818	0.818	0.909	0.909	0.909	0.909	0.909	0.909	0.909	0.909	0.909		2809.74	2029.03	2446.33	2744.59	2684.04	2332.54	2882.92	2437.46	2212.78	2490.06
Firmicutes	Bacilli	Bacillales	Staphylococcaceae	sf_1	3865	64393	AY119687.1	Macrococcus lamae str. CCM 4815	0.917	0.769	0.917	0.545	0.636	0.636	0.692	0.692	0.909	0.846	0.846	0.846	0.833	0.9	0.909	0.833	0.833	0.615	0.846	0.833	0.833	0.692	0.75	0.833	0.846	0.769	0.769	0.769	0.846	0.769		1252.37	1345.98	1087.26	837.35	851.612	1012.4	859.36	864.729	1172.05	949.975
Firmicutes	Clostridia	Clostridiales	Peptococc/Acidaminococc	sf_11	528	82350	AY214180.1	benzene-contaminated groundwater clone ZZ12C4	0.914	0.973	0.889	0.771	0.794	0.829	0.806	0.861	0.909	0.917	0.917	0.886	0.853	0.794	0.903	0.824	0.853	0.8	1	0.889	0.861	0.778	0.853	0.833	0.946	0.944	0.778	1	1	0.944		2531.68	2147.82	1882.7	1937.53	2048.14	1754.41	1983.45	1958.61	1975.15	2015.07
Proteobacteria	Deltaproteobacteria	Unclassified	Unclassified	sf_7	10048	NA			0.929	0.929	0.923	1	0.929	0.929	0.929	0.929	0.929	0.929	0.929	0.929	0.929	0.929	0.929	0.929	0.867	0.929	0.929	0.929	0.929	0.929	0.867	0.929	0.867	0.929	0.867	0.929	0.929	0.929		3726.92	3173.83	2698.14	4438.84	4179.41	3581.65	3755.31	3523.77	3097.18	3314.04
Proteobacteria	Gammaproteobacteria	Enterobacteriales	Enterobacteriaceae	sf_1	8504	63945	AF476104.1	Dysmicoccus neobrevipes symbiont	0.955	1	1	1	0.905	1	1	1	1	1	1	1	1	1	1	1	1	1	0.955	1	1	1	0.955	1	1	1	1	1	1	1		4425.32	3332.86	2953.59	3176.46	3067.15	2968.02	4077.2	4105.3	3224.03	3959.44
Actinobacteria	Actinobacteria	Actinomycetales	Acidothermaceae	sf_1	1399	75656	AJ532700.1	uranium mill tailings clone Gitt-KF-183	0.955	0.913	0.833	0.87	0.864	0.909	0.87	0.875	0.875	0.875	0.875	0.875	0.917	0.875	0.875	0.864	0.826	0.864	0.833	0.792	0.833	0.826	0.783	0.792	0.917	0.917	0.75	0.875	0.958	0.917		3394.97	2894.1	2358.15	3598.55	3667.1	3367.7	3299.06	2856.85	2514.72	2785.57
Chlorobi	Unclassified	Unclassified	Unclassified	sf_8	344	62569	AJ504563.1	sewage sludge clone	0.882	0.824	0.882	0.941	0.882	0.941	0.824	0.824	0.941	0.882	0.882	0.882	1	0.812	0.882	0.824	0.882	0.824	0.882	0.882	0.882	0.882	0.765	0.882	0.882	0.882	0.882	0.882	0.941	0.882		3032.84	2613.41	2429.96	2926.33	3357.01	2700.35	3331.15	3060.06	2774.68	2644.16
Chloroflexi	Anaerolineae	Unclassified	Unclassified	sf_9	727	71875	AF507692.1	forest soil clone S0208	1	1	1	1	1	1	1	0.938	1	1	1	0.938	1	1	1	1	1	1	1	1	1	1	1	1	1	0.938	1	1	1	1		3895.06	3262.93	3091.77	3910.24	4000.78	3832.93	3934.81	3273	3685.88	3303.16
Spirochaetes	Spirochaetes	Spirochaetales	Spirochaetaceae	sf_1	6526	83155	AY230217.1	Treponema sp. str. 7CPL208	1	1	0.857	0.929	0.857	0.857	0.929	1	0.929	1	1	1	0.929	0.929	1	0.929	0.929	1	1	1	1	0.929	1	1	1	0.929	0.929	0.929	0.929	0.929		2244.99	2174.65	2219.97	1924.83	1777.37	1892.8	2240.15	2084	2051.09	2285.2
Proteobacteria	Gammaproteobacteria	Enterobacteriales	Enterobacteriaceae	sf_1	9262	111180	AJ871363.1	Yersinia aldovae str. A125	0.927	0.91	0.893	0.846	0.8	0.85	0.909	0.9	0.922	0.913	0.914	0.933	0.931	0.911	0.897	0.902	0.917	0.897	0.918	0.894	0.919	0.903	0.852	0.913	0.953	0.952	0.919	0.924	0.948	0.934		3403.59	2780.1	1966.34	1281.92	1178.55	1338.34	2009.52	2246.13	1891.18	2191.83
Bacteroidetes	Sphingobacteria	Sphingobacteriales	Sphingobacteriaceae	sf_1	6158	59539	AF538748.1	municipal wastewater treatment bioreactor isolate str. CAGY10	1	1	0.947	1	1	1	1	1	1	1	1	1	1	1	1	1	1	1	1	1	1	1	1	1	1	1	1	1	1	1		2112.43	2030.95	1869.97	2782.7	2851.44	2802.32	3055.39	3217.87	3375.89	2532.66
Chloroflexi	Unclassified	Unclassified	Unclassified	sf_2	818	NA			1	0.909	1	0.909	0.909	1	0.909	0.917	1	1	1	0.917	0.909	1	1	1	0.909	1	1	1	1	0.909	0.909	1	1	0.917	0.909	1	1	1		3282.88	2647.89	2629.96	2556.02	3418.8	3116.42	2699.41	2238.57	2825.6	2599.74
Proteobacteria	Gammaproteobacteria	Enterobacteriales	Enterobacteriaceae	sf_1	8554	105947	AJ627202.1	Kluyvera ascorbata 69	0.967	0.967	1	0.949	0.912	0.897	0.983	0.983	0.983	0.983	0.983	0.983	0.983	0.95	0.95	0.983	0.949	0.95	1	1	1	0.983	0.917	0.967	0.983	0.983	1	1	1	1		4274.43	3311.78	2201.79	1862.3	1752.66	1697.05	2734.51	2801.72	2236.01	2721.21
OD2	Unclassified	Unclassified	Unclassified	sf_1	10531	83453	AY197399.1	Guaymas Basin hydrothermal vent sediments clone B02R017	0.556	0.75	0.364	0.667	0.583	0.667	0.833	0.833	1	1	1	1	0.917	0.667	0.917	0.917	0.75	0.667	0.833	0.833	0.833	0.667	0.583	0.833	1	1	0.917	1	0.917	1		1844.06	1163	1254.53	1629.76	1572.9	1210.88	1372.77	1396.54	1247.98	1389.61
Cyanobacteria	Cyanobacteria	Chloroplasts	Chloroplasts	sf_5	5156	NA			0.704	0.852	0.621	0.933	0.871	0.9	0.862	0.759	0.767	0.966	0.724	0.852	0.833	0.862	0.742	0.645	0.655	0.633	0.852	0.692	0.852	0.655	0.6	0.7	0.862	0.852	0.679	0.741	0.815	0.852		1078.85	1587.4	1868.15	1647.34	1418.98	1746.21	1544.24	1467.88	1357.86	1740.41
Firmicutes	Clostridia	Clostridiales	Eubacteriaceae	sf_1	28	77821	AB088988.1	termite gut homogenate clone Rs-H81 bacterium	0.917	1	0.923	1	1	1	0.833	0.769	0.909	0.923	0.923	0.846	1	0.909	1	0.909	1	0.909	0.769	0.917	0.769	0.833	0.909	0.833	0.923	0.833	0.917	0.923	0.923	0.923		2415.28	2780.1	2513.6	3363.08	3128.94	3143.73	2427.67	2007.25	2387.87	2161.01
Proteobacteria	Gammaproteobacteria	Alteromonadales	Alteromonadaceae	sf_1	9236	8880	AF114501.1	attached marine recovered surface clone 18 proteobacterium	0.944	0.942	0.941	0.962	0.925	0.943	0.906	0.904	0.926	0.942	0.923	0.942	0.944	0.962	0.944	0.98	0.882	0.9	0.963	0.963	0.907	0.923	0.816	0.868	0.926	0.962	0.907	0.907	0.926	0.907		2675.02	2402.65	2632.69	2831.55	2668.31	2553.77	2306.33	2434.21	2464.7	2480.09
Cyanobacteria	Cyanobacteria	Chloroplasts	Chloroplasts	sf_5	5183	3529	M37430.1	Pisum sativum -- chloroplast	1	1	1	1	1	1	0.96	1	1	1	1	1	1	0.96	0.96	0.96	0.96	0.96	1	1	1	0.96	0.96	0.96	1	1	0.96	1	1	1		2085.48	2248.41	2065.42	3002.54	2908.74	3127.35	2906.98	2468.8	2631.75	3225.2
Actinobacteria	Actinobacteria	Actinomycetales	Microbacteriaceae	sf_1	1197	80677	AF468440.1	Arctic sea ice ARK10173	0.913	1	0.958	0.958	0.958	1	0.917	0.958	0.957	1	1	1	0.957	0.957	0.917	1	1	1	0.958	0.958	0.958	1	1	1	1	1	1	1	1	1		1648.99	2142.07	1857.25	2899.95	2308.79	2041.2	1987.46	2192.09	2922.08	1544.62
Actinobacteria	Actinobacteria	Actinomycetales	Cellulomonadaceae	sf_1	1450	NA			0.941	0.971	0.94	0.928	0.912	0.941	0.914	0.957	0.957	0.971	0.971	0.971	0.957	0.928	0.971	0.985	1	0.956	0.957	0.956	0.957	0.985	0.909	0.971	1	0.986	0.929	0.971	1	1		2191.1	2171.77	2042.7	2428.02	2294.18	2259.7	2191.02	2216.95	2424.5	1969.75
Proteobacteria	Gammaproteobacteria	Enterobacteriales	Enterobacteriaceae	sf_1	8467	42000	AB061685.1	Serratia marcescens subsp. sakuensis str. KRED subsp.	0.962	0.975	0.962	0.941	0.833	0.853	0.981	0.975	0.975	0.968	0.981	0.987	0.974	0.968	0.968	0.974	0.967	0.955	0.987	0.981	0.987	0.961	0.968	0.974	0.975	0.968	0.974	0.994	0.987	0.981		4163.42	3403.75	2310.88	1544.75	1468.41	1608.74	2421.65	2672.01	2136.85	2723.93
Firmicutes	Clostridia	Clostridiales	Lachnospiraceae	sf_5	3017	78204	AB088993.1	termite gut homogenate clone Rs-D48 bacterium	0.96	0.96	1	1	1	0.96	1	1	1	1	1	1	1	0.92	0.98	0.96	0.98	0.98	1	0.98	1	1	1	1	1	1	1	1	1	1		3165.41	2767.64	2711.78	2021.56	2021.17	2497.32	2625.21	2913.06	2389.66	2793.72
Firmicutes	Clostridia	Clostridiales	Clostridiaceae	sf_12	4359	77816	AB089047.1	termite gut homogenate clone Rs-C69 bacterium	0.95	0.95	0.95	0.95	0.9	0.95	1	1	0.95	1	1	1	0.9	0.9	0.947	0.95	0.95	0.95	0.95	0.95	0.95	0.95	0.895	0.95	1	1	0.95	1	1	1		4124.62	3606.85	3675.4	2430.95	2273.96	2432.68	3672.08	3745.36	3098.07	3730.1
Bacteroidetes	Sphingobacteria	Sphingobacteriales	Flexibacteraceae	sf_19	5994	82222	AJ549285.1	Hymenobacter sp. str. NS/50	0.941	0.941	0.938	0.938	0.933	0.938	1	1	0.941	1	1	1	1	1	1	1	1	1	0.941	0.938	1	1	0.938	0.941	1	1	0.941	1	1	1		2255.77	2954.45	2641.78	3170.6	3414.31	3142.82	3549.75	3548.63	3523.29	3075.64
Actinobacteria	Actinobacteria	Actinomycetales	Kineosporiaceae	sf_1	1961	12664	X77958.1	Kineococcus aurantiacus str. IFO 15268	0.952	1	1	0.952	1	1	1	1	1	1	1	1	1	1	1	1	1	1	1	1	1	1	0.895	0.952	1	1	0.952	0.952	1	1		1883.94	2447.67	2228.15	3145.19	3328.92	3056.33	1819	2023.47	2312.83	1580.87
Proteobacteria	Deltaproteobacteria	Myxococcales	Polyangiaceae	sf_3	9735	77008	AJ518790.1	uranium mining waste pile clone JG37-AG-15 proteobacterium	0.938	1	0.938	0.938	0.938	0.938	0.938	1	0.938	0.938	0.938	0.938	0.938	1	0.938	1	0.938	1	0.938	0.938	0.938	0.938	0.938	0.938	0.938	0.938	0.938	0.938	0.938	0.938		3302.28	3011.93	3089.96	2641.02	2506.52	2921.59	3104.53	3502.15	2975.68	3304.97
Cyanobacteria	Cyanobacteria	Oscillatoriales	Unclassified	sf_1	5049	59109	AF420444.1	Oscillatoria spongeliae str. 520bg	0.909	0.879	0.938	0.938	0.969	0.938	0.879	0.848	0.939	0.969	0.906	0.939	0.938	0.909	0.909	0.938	0.818	0.844	0.969	0.909	0.844	0.879	0.75	0.818	0.909	0.939	0.848	0.875	0.97	0.938		1972.32	1871.92	1989.06	2038.17	1979.6	2165.93	2173.97	1893.76	2102.01	2120.22
Firmicutes	Clostridia	Clostridiales	Clostridiaceae	sf_12	4590	105443	AY542483.1	Swine manure pit isolate str. PPC78A	0.636	0.958	0.81	0.6	0.632	0.65	0.818	0.857	0.8	0.792	0.818	0.913	0.65	0.684	0.619	0.81	0.762	0.739	0.792	0.875	0.833	0.864	0.818	0.87	0.917	0.913	0.792	0.792	0.913	0.792		1243.74	1550.99	1069.98	681.996	756.114	960.509	931.558	1047.4	1035.37	1088.66
Spirochaetes	Spirochaetes	Spirochaetales	Spirochaetaceae	sf_1	6473	77621	AB088891.1	termite gut homogenate clone Rs-B29 sp.	0.933	0.867	0.933	0.867	0.867	0.867	0.867	0.867	0.933	1	0.933	0.933	0.867	0.8	0.8	0.8	0.867	0.857	0.929	0.933	0.933	0.8	0.867	0.933	0.933	0.933	0.867	0.933	1	0.933		1895.79	2114.29	1874.52	2063.58	2100.94	1875.5	1850.08	1889.43	1722.34	2056.77
Proteobacteria	Gammaproteobacteria	Enterobacteriales	Enterobacteriaceae	sf_1	8711	10171	AJ233432.1	Serratia odorifera str. DSM 4582	0.949	0.955	0.916	0.914	0.811	0.839	0.955	0.943	0.949	0.936	0.962	0.968	0.968	0.929	0.942	0.947	0.947	0.908	0.955	0.954	0.962	0.935	0.941	0.949	0.975	0.962	0.974	0.994	0.981	0.968		3932.78	3110.6	2208.15	1512.51	1363.93	1561.4	2352.46	2575.81	2177.05	2617.87
Proteobacteria	Betaproteobacteria	Burkholderiales	Burkholderiaceae	sf_1	8097	59707	AB091761.1	Burkholderia cepacia	0.968	1	1	0.984	0.984	0.968	1	1	1	1	1	1	0.984	0.968	1	1	1	1	1	1	1	1	1	1	1	1	1	1	1	1		2537.07	2406.48	2685.42	1486.13	1251.58	1788.1	2520.92	2514.2	2300.33	2568.02
Cyanobacteria	Cyanobacteria	Chloroplasts	Chloroplasts	sf_5	4976	42014	AF244550.1	Calypogeia muelleriana	1	1	1	1	1	1	1	1	1	1	1	1	1	1	1	1	1	1	1	1	1	1	1	1	1	1	1	1	1	1		2346.3	2331.76	2214.51	3180.37	3108.72	3212.93	2930.05	2622.29	2694.28	3452.72
Firmicutes	Desulfotomaculum	Unclassified	Unclassified	sf_1	2541	60012	AB091328.1	UASB granular sludge clone UT-2	0.935	0.871	0.967	0.933	0.966	0.966	0.871	0.967	0.967	0.903	0.933	0.844	0.931	0.931	0.839	0.933	0.967	0.812	0.875	0.871	0.903	0.967	0.967	0.933	0.844	0.935	0.844	0.967	0.933	0.967		3182.65	2656.52	2984.5	2945.87	3244.66	2836.01	2753.56	2649.31	2596.91	2616.06
Proteobacteria	Gammaproteobacteria	Enterobacteriales	Enterobacteriaceae	sf_1	8529	73261	AF181574.1	Raoultella planticola 7	0.978	0.971	0.993	0.956	0.873	0.911	0.993	0.986	0.993	0.986	0.993	0.993	0.993	0.978	0.978	0.993	0.978	0.957	0.993	0.993	1	0.993	0.935	0.986	0.986	0.993	0.993	1	1	1		4235.63	3264.84	2219.06	1582.86	1538.07	1570.5	2579.08	2706.6	2130.59	2656.85
Actinobacteria	Actinobacteria	Actinomycetales	Mycobacteriaceae	sf_1	1175	39844	AJ243481.1	Mycobacterium cf. xenopi 'Hymi_Wue Tb_939/99' str. Hymi_Wue Tb_939/99	0.885	1	1	1	0.962	0.962	0.962	1	0.962	0.962	0.962	1	0.962	0.885	0.962	1	1	0.923	1	0.962	1	1	0.92	1	1	0.962	0.962	0.962	1	1		1527.2	1610.39	1355.43	1562.34	1303.26	1664.28	1378.79	1370.6	1596.38	1368.76
Acidobacteria	Acidobacteria-9	Unclassified	Unclassified	sf_1	704	60180	AJ347029.1	sponge clone TK29	0.85	0.905	0.85	1	1	1	0.905	0.95	0.9	1	1	0.952	0.95	0.895	0.857	0.9	0.9	0.857	0.905	0.85	0.905	0.9	0.9	0.905	0.952	0.95	0.9	1	1	1		2133.98	2137.28	2017.24	1791.95	1679.63	1940.14	1839.05	1965.1	1820.61	2025.04
Unclassified	Unclassified	Unclassified	Unclassified	sf_95	2545	85421	AB106352.1	anaerobic sludge isolate str. JE	0.871	0.969	0.969	1	0.938	0.969	0.969	0.969	0.938	0.969	0.969	0.969	0.969	0.938	0.938	0.968	0.968	0.969	0.969	0.935	0.969	0.935	0.968	0.969	0.969	0.938	0.938	0.938	0.969	1		3005.9	2805.96	3215.41	3267.33	3449.14	3209.28	2706.43	2557.44	2607.63	2888
Chloroflexi	Anaerolineae	Chloroflexi-1f	Unclassified	sf_1	767	65482	AJ278166.2	anaerobic bioreactor clone SHD-197	0.897	0.862	0.867	0.867	0.867	0.867	0.867	0.839	0.9	0.9	0.871	0.839	0.867	0.867	0.897	0.897	0.867	0.867	0.897	0.897	0.897	0.867	0.867	0.867	0.933	0.867	0.897	0.9	0.9	0.9		2561.86	2165.07	1986.33	1959.03	2180.71	2143.16	2006.51	2115.34	2195.81	2121.13
Proteobacteria	Gammaproteobacteria	Unclassified	Unclassified	sf_3	9367	47581	AF387348.1	USA: Pacific Ocean seawater Naha Vents Hawaii isolate str. PV-4	0.905	0.864	0.909	0.909	0.909	0.955	0.864	0.864	0.955	0.864	0.909	0.864	0.955	0.909	0.955	0.909	0.909	0.905	1	0.955	0.955	0.909	0.909	0.909	0.909	0.909	0.909	0.909	0.909	0.909		3583.58	2691	2096.33	1725.51	1379.66	1733.47	2274.25	2385.57	2177.05	2367.69
Actinobacteria	Actinobacteria	Coriobacteriales	Coriobacteriaceae	sf_1	1926	11369	AB011815.1	Collinsella aerofaciens str. JCM7791	0.769	0.846	0.8	0.714	0.714	0.786	0.714	0.714	0.714	0.786	0.714	0.786	0.846	0.769	0.769	0.769	0.714	0.769	0.769	0.769	0.769	0.667	0.769	0.769	1	0.733	0.714	0.667	0.733	0.733		2531.68	2096.09	1739.97	2422.16	2235.76	2177.76	1987.46	1933.75	2049.3	1957.96
Fusobacteria	Fusobacteria	Fusobacterales	Fusobacteriaceae	sf_3	558	58542	AJ344093.1	Sneathia sanguinegens str. CCUG 41628T	0.929	0.929	0.929	0.538	0.538	0.571	0.692	0.692	0.615	0.692	0.692	0.692	0.692	0.538	0.538	0.692	0.667	0.538	0.643	0.643	0.643	0.692	0.5	0.692	0.833	0.692	0.615	0.75	0.692	0.692		2221.28	2199.55	2581.78	2489.58	2812.12	1945.6	2436.69	2298.02	1979.62	1962.5
Bacteroidetes	Unclassified	Unclassified	Unclassified	sf_4	5785	62696	AF507862.1	Mono Lake at depth 35 m station 6 July 2000 clone ML635J-56	1	1	1	1	1	1	1	1	1	1	1	1	1	1	1	1	1	1	1	1	1	1	1	1	1	1	1	1	1	1		3035	3732.34	4147.21	4602.98	4355.8	3873.9	4459.25	3803.73	3532.23	4092.69
Proteobacteria	Deltaproteobacteria	Desulfovibrionales	Desulfovibrionaceae	sf_1	10059	56227	AF458778.1	Desulfovibrio hydrothermalis str. AM13	0.811	0.829	0.857	0.811	0.811	0.789	0.914	0.865	0.889	0.914	0.889	0.889	0.861	0.806	0.861	0.757	0.811	0.806	0.861	0.789	0.889	0.811	0.806	0.833	0.889	0.889	0.861	0.865	0.917	0.889		2402.35	2121.96	2244.51	1838.85	1908.82	1833.62	2182.99	2061.3	1925.13	2162.83
Firmicutes	Clostridia	Clostridiales	Peptococc/Acidaminococc	sf_11	300	81849	AY214183.1	benzene-contaminated groundwater clone ZZ12C8	0.952	0.905	0.95	0.905	0.95	0.952	0.952	0.905	0.905	0.952	0.952	0.952	0.952	0.857	0.81	0.95	0.95	0.905	0.905	0.95	0.905	0.95	0.95	0.95	1	1	0.905	0.952	1	1		2643.77	2478.33	2403.6	2218.93	2373.95	2283.37	2108.79	2185.6	2240.47	2366.78
Bacteroidetes	Unclassified	Unclassified	Unclassified	sf_6	5655	NA			0.808	0.846	0.778	0.828	0.793	0.846	0.964	0.963	0.903	0.808	0.821	0.759	0.964	0.897	0.867	0.778	0.852	0.778	0.741	0.846	0.92	0.852	0.821	0.852	0.786	0.885	0.885	0.852	0.815	0.75		1667.31	1406.33	1857.25	2338.13	2521.13	2396.27	1990.47	1944.56	2057.34	1796.61
Bacteroidetes	Sphingobacteria	Sphingobacteriales	Crenotrichaceae	sf_11	5772	82403	AY218571.1	penguin droppings sediments clone KD2-128	0.8	0.727	0.8	0.8	0.8	0.8	0.9	0.9	0.9	1	1	0.909	0.8	0.8	0.8	0.8	0.8	0.727	0.7	0.9	0.9	0.8	0.7	0.8	0.909	1	0.9	0.909	0.9	0.909		2046.68	1519.38	1813.61	1180.3	1141.47	1642.43	2041.61	1846.2	2004.63	1633.45
Proteobacteria	Gammaproteobacteria	Enterobacteriales	Enterobacteriaceae	sf_1	8712	10173	AJ233434.1	Serratia proteamaculans str. DSM 4543	0.967	0.962	0.943	0.907	0.836	0.887	0.971	0.967	0.971	0.962	0.981	0.981	0.981	0.967	0.957	0.966	0.976	0.947	0.967	0.966	0.981	0.962	0.927	0.976	0.981	0.991	0.981	0.995	0.991	0.986		3730.16	3089.53	2079.06	1139.27	1053.84	1271.88	2208.06	2445.02	1957.29	2442.02
Firmicutes	Clostridia	Clostridiales	Unclassified	sf_17	602	NA			0.75	0.941	0.765	0.75	0.8	0.867	0.765	0.765	0.933	0.824	0.765	0.812	0.933	0.933	0.812	0.929	0.812	0.812	0.812	0.867	0.812	0.812	0.812	0.812	0.812	0.812	0.765	0.765	0.765	0.812		3013.44	2505.15	2220.88	2568.72	2909.86	2563.79	2736.51	2104.54	2360.18	2163.73
Actinobacteria	Actinobacteria	Actinomycetales	Micrococcaceae	sf_1	1494	12433	X80748.1	Arthrobacter agilis str. DSM 20550	0.774	0.941	0.879	0.742	0.767	0.8	0.735	0.818	0.774	0.941	0.971	0.853	0.735	0.8	0.75	0.781	0.788	0.781	1	0.941	1	0.774	0.733	0.706	1	0.971	0.794	1	1	1		1757.84	1990.71	1896.34	2561.88	2598.65	2435.41	1834.04	1976.99	2370.9	1729.53
Proteobacteria	Unclassified	Unclassified	Unclassified	sf_20	9618	NA			0.545	0.786	0.667	0.7	0.7	0.889	0.769	0.769	0.786	0.846	0.769	0.8	0.667	0.333	0.6	1	0.692	0.714	0.75	0.667	0.714	0.769	0.417	0.769	0.867	0.846	0.769	0.571	0.923	0.769		781.382	823.874	942.714	984.888	405.583	925.913	826.269	853.92	654.811	920.062
Proteobacteria	Gammaproteobacteria	Enterobacteriales	Enterobacteriaceae	sf_1	8624	63941	AF476105.1	Erium globosum symbiont	0.864	0.955	0.909	0.857	0.81	0.85	0.905	0.905	0.952	0.952	0.952	0.952	0.952	0.905	0.952	0.955	0.909	0.909	0.909	0.909	0.955	0.909	0.952	0.909	0.955	0.955	0.955	0.909	0.909	0.955		2136.14	1887.25	1432.71	1252.61	1019.01	1395.7	1555.27	1703.52	1524.91	1695.09
Firmicutes	Clostridia	Clostridiales	Clostridiaceae	sf_12	4598	104559	AB161372.1	Clostridium sardiniense str. DSM 600	1	0.991	0.955	0.954	0.927	0.954	0.982	1	0.991	1	1	1	1	0.945	0.936	0.973	0.982	0.982	0.991	0.982	0.991	0.991	0.946	1	1	0.991	0.982	0.991	0.991	0.991		3002.66	3025.34	2694.51	2301	2196.44	2285.19	2585.1	2603.92	2179.73	2750.21
Proteobacteria	Gammaproteobacteria	Enterobacteriales	Enterobacteriaceae	sf_1	8758	9861	U80201.1	Pectobacterium cypripedii str. ATCC 29267	1	1	0.857	0.692	0.667	0.75	0.929	0.929	0.929	1	1	1	0.857	0.857	1	1	0.929	0.923	1	1	1	1	0.929	1	1	1	1	1	1	1		2352.77	2138.24	580.901	314.617	287.616	528.052	602.655	865.81	517.238	995.298
Actinobacteria	Actinobacteria	Actinomycetales	Unclassified	sf_3	1577	77874	AB089072.1	termite gut homogenate clone Rs-N91 bacterium	0.97	0.939	0.939	0.97	0.97	1	0.939	0.97	0.97	0.97	0.97	0.97	0.97	0.939	0.909	0.97	0.97	0.97	0.97	0.97	0.97	0.97	0.969	0.97	0.97	0.97	0.97	0.97	0.97	1		2585.57	2995.65	2599.96	2675.22	2446.98	2542.85	3217.84	3158.42	3090.03	2810.95
Actinobacteria	Actinobacteria	Actinomycetales	Microbacteriaceae	sf_1	1098	NA			0.5	0.842	0.684	0.889	0.833	0.722	0.895	0.895	0.857	0.833	0.8	0.85	0.895	0.947	0.9	0.789	0.85	0.81	0.722	0.619	0.714	0.85	0.714	0.81	0.81	0.895	0.75	0.842	0.842	0.842		780.304	853.572	882.714	1452.91	1025.75	888.585	1135.12	1109.02	1417.71	871.113
Proteobacteria	Gammaproteobacteria	Alteromonadales	Alteromonadaceae	sf_1	9247	87995	AF500078.1	Shewanella japonica KMM 3577	0.842	0.95	0.9	0.95	0.95	0.95	0.95	0.95	1	0.95	0.95	0.95	1	1	1	1	0.9	0.947	1	1	1	0.95	0.85	0.95	0.95	0.95	0.95	0.95	0.95	0.95		2696.58	2126.75	1944.52	1592.63	1462.79	1713.44	2199.04	2098.05	2152.03	2085.78
Bacteroidetes	Sphingobacteria	Sphingobacteriales	Unclassified	sf_8	5380	2554	AJ007870.1	cytophagales clone LD1	0.444	0.455	0.4	0.667	0.556	0.6	0.636	0.636	0.8	0.909	0.818	0.818	0.556	0.375	0.5	0.4	0.5	0.4	0.273	0.7	0.7	0.4	0.364	0.5	0.909	0.545	0.455	0.545	0.636	0.545		276.987	300.81	397.267	454.338	453.893	410.606	302.832	249.691	391.279	366.212
Proteobacteria	Betaproteobacteria	Hydrogenophilales	Hydrogenophilaceae	sf_1	7706	84214	AY219713.1	Petrobacter succinatimandens str. BON4	0.857	0.839	0.903	0.69	0.704	0.63	0.759	0.677	0.786	0.774	0.806	0.71	0.724	0.679	0.69	0.793	0.759	0.767	0.833	0.8	0.774	0.759	0.724	0.733	0.839	0.774	0.8	0.871	0.935	0.903		1922.74	1837.43	2341.78	1109.95	947.109	1183.57	1864.12	1725.14	1597.27	1947.99
Acidobacteria	Solibacteres	Unclassified	Unclassified	sf_1	6357	60816	AY118153.1	anaerobic benzene-degrading clone Cart-N4	0.95	0.976	0.878	0.805	0.816	0.919	0.976	0.976	1	1	0.976	1	0.929	0.902	0.975	0.897	0.951	0.927	0.952	0.951	0.95	0.975	0.949	0.951	0.976	0.976	1	0.976	0.976	0.976		2643.77	2345.17	2192.7	2029.38	2106.56	2003.87	2605.15	2571.49	2344.99	2488.25
Actinobacteria	Actinobacteria	Actinomycetales	Streptomycetaceae	sf_1	1229	11793	AF074412.1	Streptacidiphilus carbonis str. JL 415; DSM 41754	0.571	0.714	0.643	0.769	0.692	0.714	0.571	0.786	0.733	0.786	0.857	0.6	0.786	0.833	0.538	0.786	0.786	0.5	0.4	0.769	0.5	0.786	0.733	0.533	0.75	0.846	0.5	0.733	0.929	0.857		127.177	199.263	339.086	206.162	141.561	252.191	121.333	171.865	461.852	185.825
Actinobacteria	Actinobacteria	Acidimicrobiales	Acidimicrobiaceae	sf_1	1856	63307	AF523913.1	forested wetland clone RCP2-105	0.955	1	0.909	1	0.955	1	1	1	1	1	1	1	1	1	1	1	1	1	1	0.955	1	1	1	1	1	1	0.955	0.955	1	1		2484.26	2179.44	2386.33	2291.23	2235.76	2455.44	2408.61	2327.2	2294.07	2430.23
Proteobacteria	Alphaproteobacteria	Acetobacterales	Acetobacteraceae	sf_1	6834	NA			1	0.9	0.889	0.889	0.889	0.889	0.9	0.9	0.889	0.9	0.9	1	0.889	0.8	0.6	0.8	0.8	0.5	0.7	0.8	0.8	1	0.8	0.7	0.818	0.9	0.9	0.9	0.9	0.9		2251.46	1856.59	2008.15	2668.38	2777.29	2346.19	2146.9	2169.39	2124.34	1901.76
OP10	Unclassified	Unclassified	Unclassified	sf_5	9782	79712	AY192275.1	Rocky Mountain alpine soil clone S1a-1H	0.933	0.933	0.933	1	1	1	1	0.933	1	0.933	1	0.933	1	0.933	1	0.933	1	1	0.933	1	0.933	1	1	1	1	1	1	1	1	1		3150.32	3125.93	2425.42	2795.4	2658.2	2788.66	3258.95	3111.94	3023.92	2968.67
[truncated: 2,152 more rows]
[truncated: 20 more columns]
